# Supplementary material for: MLe-KCNQ2: An Artificial Intelligence Model for the Prognosis of Missense KCNQ2 Gene Variants
Source: MDPI journal article supplement (doi:10.3390/ijms25052910), 2024-03-02
Supplement: s1 [file s1]

**Supplemental material description:**

- AlphaFold2\_KCNQ2\_Prediction.pdb: PDB file containing the highest ranked KCNQ2 structure predicted by AlphaFold2.
- Supp\_Alignment.xlsx: Multiple sequence alignment of KCNQ2 sequences used to calculate evolutionary conservation.
- Supp\_Data\_1\_FINAL\_DATASET\_KCNQ2.xlsx: Set of variants used for comparison of different predictive models.
- Supp\_Data\_2\_KCNQ2\_Performance\_Tools.xlsx: Performance, measured in sensitivity, specificity and AUC-ROC, of all predictive models for the set of variants in the Supp\_Data\_1\_FINAL\_DATASET\_KCNQ2.xlsx file
- Supp\_Data\_3\_KCNQ2\_All\_Predictions.xlsx: Predictions made by our model for all variants in our dataset (both train and test sets).
- Supp\_Data\_4\_All\_Possible\_Predictions\_no\_codon.xlsx: Predictions made by our model for all possible amino acid changes in the KCNQ2 amino acid sequence.
- Supp\_Data\_5\_All\_Possible\_Predictions.csv: Predictions made by our model for all possible nucleotide changes in the KCNQ2 gene.
- Supp\_Feature\_Description.docx: Detailed description and numerical values (when appropriate) of all the features employed for model development.
- AUC\_ROC\_Scores.xlsx: AUC-ROC scores computed for the models compared in this study.
