# Supplementary material for: MLe-KCNQ2: An Artificial Intelligence Model for the Prognosis of Missense KCNQ2 Gene Variants
Source: MDPI journal article supplement (doi:10.3390/ijms25052910), 2024-03-02
Supplement: s1 [file s1]

## SUPPLEMENTARY MATERIAL

### Physico-chemical changes features

The physiological pH value of nerve cells is 7.4 (Jalalvand et al., 2016). The basic physico-chemical properties of the amino acids used to generate these descriptors are listed in Table S1.

**Table S1.** Physico-chemical properties of the amino acids at pH = 7.4

| Amino acid | Charge   | Polarity  | Aromaticity  | Size (Da) | Standardized volume (%) | Medium solvent accessibility (%) | Hydrophobicity |
|------------|----------|-----------|--------------|-----------|-------------------------|----------------------------------|----------------|
| (Ser) S    | neutral  | polar     | non aromatic | 105.09    | 18.1                    | 40.5                             | -0.8           |
| (Thr) T    | neutral  | polar     | non aromatic | 119.12    | 34                      | 35.3                             | -0.7           |
| (Gln) Q    | neutral  | polar     | non aromatic | 146.15    | 51.3                    | 43.6                             | -3.5           |
| (Asn) N    | neutral  | polar     | non aromatic | 132.12    | 35.4                    | 46.1                             | -3.5           |
| (Tyr) Y    | neutral  | non polar | aromatic     | 181.19    | 78.5                    | 30.1                             | -1.3           |
| (Cys) C    | neutral  | polar     | non aromatic | 121.16    | 28                      | 7.4                              | 2.5            |
| (Gly) G    | neutral  | polar     | non aromatic | 75.07     | 0                       | 54                               | -0.4           |
| (Ala) A    | neutral  | non polar | non aromatic | 89.09     | 15.9                    | 37.4                             | 1.8            |
| (Val) V    | neutral  | non polar | non aromatic | 117.15    | 47.7                    | 19.6                             | 4.2            |
| (Leu) L    | neutral  | non polar | non aromatic | 131.17    | 63.6                    | 10.1                             | 3.8            |
| (Ile) I    | neutral  | non polar | non aromatic | 131.17    | 63.6                    | 7.5                              | 4.5            |
| (Met) M    | neutral  | non polar | non aromatic | 149.21    | 62.8                    | 3.9                              | 1.9            |
| (Pro) P    | neutral  | non polar | non aromatic | 115.13    | 41                      | 66.2                             | -1.6           |
| (Phe) F    | neutral  | non polar | aromatic     | 165.19    | 77.2                    | 5.5                              | 2.8            |
| (Trp) W    | neutral  | non polar | aromatic     | 204.23    | 100                     | 13.8                             | -0.9           |
| (Asp) D    | negative | polar     | non aromatic | 133.1     | 31.3                    | 45                               | -3.5           |
| (Glu) E    | negative | polar     | non aromatic | 147.13    | 47.2                    | 48.6                             | -3.5           |
| (Lys) K    | positive | polar     | non aromatic | 146.19    | 68                      | 54.3                             | -3.9           |
| (Arg) R    | positive | polar     | non aromatic | 174.2     | 70.8                    | 50.1                             | -4.5           |
| (His) H    | positive | polar     | non aromatic | 155.16    | 49.2                    | 28.1                             | -3.2           |

#### 1. Quantitative changes (*d\_size*, *d\_hf*, *d\_vol* and *d\_msa*)

Quantitative changes (e.g., changes in size (*d\_size*), hydrophobicity (*d\_hf*), volume (*d\_vol*), mean solvent accessibility (*d\_msa*)) that occur between the original amino acid and the one resulting from the substitution. These descriptors were calculated by subtracting the value of the original amino acid to the new one. The hydrophobicity of the amino acids was obtained from (Kyte and Doolittle, 1982) and both volume and average solvent accessibility from (Bogardt, Jr. et al., 1980).

#### 2. Qualitative changes (*d\_charge*, *d\_pol* and *d\_aro*)

Qualitative changes (e.g., changes in charge (*d\_charge*), polarity (*d\_pol*) and aromaticity (*d\_aro*)) that occur between the original amino acid and the one resulting from the substitution. To determine the charge change of the amino acids, they were first classified according to their charge and then a unique code was generated for each of the possible charge changes. E.g.: If the initial amino acid has positive charge (pos) and the resultant of the mutation has negative charge (neg), the change is set as pos\_to\_neg; if the initial amino acid has neutral charge (neu) and the resultant of the mutation has

positive charge (pos), the change is set as neu\_to\_pos, etc. The same procedure is performed for changes in polarity and in aromaticity.

## Biological-evolutive features

### 1. Original and mutated residues (*initial aa* and *final aa*)

These data were extracted directly from the nomenclature of the collected variants. E.g.: in the case of "L101H": "L" corresponds to the original amino acid and "H" to the amino acid resulting from the substitution (final).

### 2. Functional and topological affected domains (*functional domain* and *topological domain*)

The main topological and functional domains of K<sub>v</sub>7.2 were obtained: (1) directly from information available from Uniprot (<https://www.uniprot.org/>) (Uniprot ID: O43526) (2022), (2) from the PDB (PDB DOI: <https://www.rcsb.org/structure/7CR3>) (<https://www.rcsb.org/>) (Berman et al., 2003), (3) from information currently known in the laboratory and (4) from other bibliographic sources (Tables S2 y S3).

**Table S2.** Main topological domains of the K<sub>v</sub>7.2 channel.

| Topological domain | Initial residue | Final residue | Reference                 |
|--------------------|-----------------|---------------|---------------------------|
| S1                 | A92             | F112          | Uniprot (O43526)          |
| S2                 | E123            | V143          | Uniprot (O43526)          |
| S3                 | P167            | S187          | Uniprot (O43526)          |
| S4                 | A196            | W218          | Uniprot (O43526)          |
| S5                 | L232            | L252          | Uniprot (O43526)          |
| Pore               | A265            | P285          | Uniprot (O43526)          |
| S6                 | L292            | L312          | Uniprot (O43526)          |
| hA                 | R332            | N350          | RSCB PDB (7CR3)           |
| hTW                | H357            | T366          | RSCB PDB (7CR3)           |
| hB                 | G535            | L559          | RSCB PDB (7CR3)           |
| hC                 | D563            | G594          | RSCB PDB (7CR3)           |
| hD                 | R622            | R647          | Bernardo-Seisdedos (2015) |

**Table S3.** Main functional domains of the K<sub>v</sub>7.2 channel.

| Functional domain             | Initial residue                                         | Final residue | Reference                                                   |
|-------------------------------|---------------------------------------------------------|---------------|-------------------------------------------------------------|
| Voltage sensor domain (S1-S4) | A92                                                     | W218          | Ambrosino <i>et al.</i> (2015)                              |
| Selectivity filter            | T277                                                    | D282          | Uniprot (O43526)                                            |
| Pore domain (S5-S6)           | L232                                                    | L312          | Bañales-Belaunde (2019);<br>Yus-Nájera <i>et al.</i> (2002) |
| CaM interaction (hA-hTW-hB)   | R332                                                    | L559          | Ambrosino <i>et al.</i> (2015)                              |
| SID domain (hC-hD)            | D563                                                    | R647          | Bernardo-Seisdedos (2015)                                   |
| Unknown function              | <i>Residues not included in any of the above ranges</i> |               |                                                             |

3. Evolutionary conservation value across species of the substituted residue (residue conserv)

The evolutionary conservation value of each residue (residue\_conserv) in the K<sub>v</sub>7.2 channel (KCNQ2) was calculated by performing a Multiple Sequence Alignment (MSA) with Clustal Omega (<https://www.ebi.ac.uk/Tools/msa/clustalo/>) (Sievers and Higgins, 2018). A total of 62 species available in Uniprot were considered for this analysis. Species with similar sequence length for the channel were aligned, and the evolutionary conservation value was calculated using the software of (Capra and Singh, 2007) available at: <https://compbio.cs.princeton.edu/conservation/score.html>. The conservation values obtained for each residue and the 62 species considered are shown in Data S2 and Table S4, respectively.

**Table S4.** Species from which KCNQ2 sequences were obtained for the estimation of evolutionary conservation value. The sequences of all species (62) range from 850 to 875 amino acids.

| UniProt Code | Specie                             | UniProt Code | Specie                                |
|--------------|------------------------------------|--------------|---------------------------------------|
| A0A6J1YBD7   | <i>Acinonyx jubatus</i>            | A0A6J1VM80   | <i>Notechis scutatus</i>              |
| A0A7N5JUP3   | <i>Ailuropoda melanoleuca</i>      | A0A7L4BX40   | <i>Nyctiprogne leucopyga</i>          |
| A0A2K5EWT1   | <i>Aotus nancymae</i>              | A0A6P3FS62   | <i>Octodon degus</i>                  |
| A0A6P3GU07   | <i>Bison bison bison</i>           | A0A2U3WMF7   | <i>Odobenus rosmarus divergens</i>    |
| G3N2R2       | <i>Bos taurus</i>                  | A0A6J0W124   | <i>Odocoileus virginianus texanus</i> |
| F7CY15       | <i>Callithrix jacchus</i>          | A0A7L1ERT0   | <i>Oenanthe oenanthe</i>              |
| A0A452E7F3   | <i>Capra hircus</i>                | H0X1I7       | <i>Otolemur garnettii</i>             |
| A0A286XK97   | <i>Cavia porcellus</i>             | A0A6P3YM10   | <i>Ovis aries</i>                     |
| A0A2K5QX14   | <i>Cebus imitator</i>              | A0A2R9AU86   | <i>Pan paniscus</i>                   |
| A0A2K5L1K5   | <i>Cercocebus atys</i>             | H2QKS4       | <i>Pan troglodytes</i>                |
| A0A7L3EB03   | <i>Chaetops frenatus</i>           | A0A6P9E1I7   | <i>Pantherophis guttatus</i>          |
| A0A6J2VKS8   | <i>Chanos chanos</i>               | A0A2I3NH12   | <i>Papio anubis</i>                   |
| A0A6I9KEP6   | <i>Chrysochloris asiatica</i>      | A0A6J0CPL8   | <i>Peromyscus maniculatus bairdii</i> |
| A0A6J2PDX4   | <i>Cottoperca gobio</i>            | A0A6P5JXG8   | <i>Phascogale cinereus</i>            |
| A0A2Y9Q6H4   | <i>Delphinapterus leucas</i>       | A0A6J2MPK5   | <i>Phyllostomus discolor</i>          |
| A0A4W4F1P1   | <i>Electrophorus electricus</i>    | A0A2Y9T7Y1   | <i>Physeter macrocephalus</i>         |
| F6VHK7       | <i>Equus caballus</i>              | A0A2K6ET95   | <i>Propithecus coquereli</i>          |
| A0A1S3WCY9   | <i>Erinaceus europaeus</i>         | O88943       | <i>Rattus norvegicus</i>              |
| M3WAG9       | <i>Felis catus</i>                 | A0A671F4Z0   | <i>Rhinolophus ferrumequinum</i>      |
| G3QZ98       | <i>Gorilla gorilla gorilla</i>     | A0A2K6P629   | <i>Rhinopithecus roxellana</i>        |
| A0A7K9DPE3   | <i>Hemiprocne comata</i>           | A0A7N4NU17   | <i>Sarcophilus harrisii</i>           |
| O43526       | <i>Homo sapiens</i>                | A0A672MMS1   | <i>Sinocyclocheilus grahami</i>       |
| A0A2D0RWX1   | <i>Ictalurus punctatus</i>         | A0A286ZS06   | <i>Sus scrofa</i>                     |
| A0A287DBX6   | <i>Ictidomys tridecemlineatus</i>  | A0A6J3Q231   | <i>Tursiops truncatus</i>             |
| A0A6J0IPQ1   | <i>Lepidothrix coronata</i>        | A0A452SKB9   | <i>Ursus americanus</i>               |
| A0A340XT99   | <i>Lipotes vexillifer</i>          | A0A3Q7W3Y1   | <i>Ursus arctos horribilis</i>        |
| A0A2K6C5Y1   | <i>Macaca nemestrina</i>           | A0A6J3BGW9   | <i>Vicugna pacos</i>                  |
| A0A1U8BXY3   | <i>Mesocricetus auratus</i>        | A0A4X2LHR0   | <i>Vombatus ursinus</i>               |
| F6WQP9       | <i>Monodelphis domestica</i>       | A0A3Q7U035   | <i>Vulpes vulpes</i>                  |
| B7ZBV9       | <i>Mus musculus</i>                | A0A6I8QM30   | <i>Xenopus tropicalis</i>             |
| A0A341BVZ4   | <i>Neophocaena asiaeorientalis</i> | A0A6J2FFJ4   | <i>Zalophus californianus</i>         |

## Structural-based features

In order to characterise the *KCNQ2* dataset using structural descriptors, it is necessary to know the structure of the protein in which each variant is found. However, the structure of the  $K_v7.2$  channel is not fully solved as it only covers a fragment of its protein sequence (see Figure S2). This was a major challenge as a large number of the collected variants were located in areas of unknown structure. The following approaches were used.

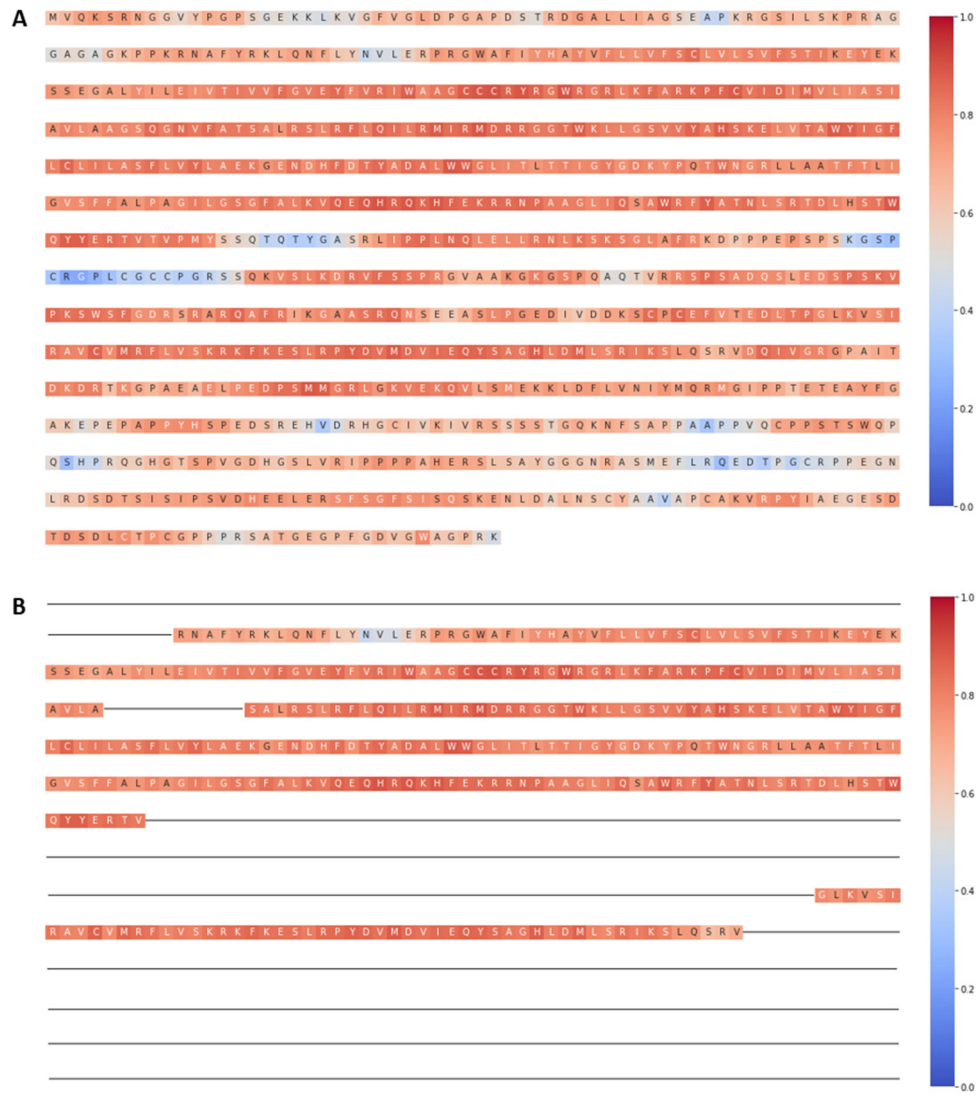

Figure S2. Complete sequence of the *KCNQ2* gene against the structurally solved sequence of the  $K_v7.2$  channel. (A) Complete sequence of *KCNQ2* gene isoform 1 (UniProt ID: O43526) from residue 1 to 872. Each residue is coloured with its evolutive conservation value: red colour corresponding to more conserved residues (values close to 1) and blue colour to less conserved residues (values close to 0). (B) Structurally solved sequence of the  $K_v7.2$  channel using 7CR3 PDB file as a reference. The residues whose structure is solved are coloured following the same pattern as in (A). The black lines simulate the sequence fragments of unknown structure.

### 1. Location within the structural landscape of *KCNQ2* (*str landscape*)

It is a qualitative feature of structurally solved and unsolved regions of the K<sub>v</sub>7.2 channel structure submitted in the RCSB Protein Data Bank (<https://www.rcsb.org/>) (PDB: 7CR3). We distinguish between GAPs and fragments (Figure S3).

#### GAPs

Correspond to regions (set of residues) with unsolved structure in the submitted 7CR3 file. In the specific case of the structure of the *KCNQ2* gene, 4 GAPs are identified:

- GAP 1 refers to amino acids located between positions 1-69.
- GAP 2 refers to amino acids located between positions 185-194.
- GAP 3 refers to amino acids located between positions 368-534.
- GAP 4 refers to amino acids located between positions 596-872.

#### Fragments (FRAGs)

Correspond to regions (set of residues) with solved structure in the submitted 7CR3 file. In the specific case of the structure of the *KCNQ2* gene, 3 fragments are identified:

- FRAG 1 refers to amino acids located between positions 70-184, which includes Cytoplasmic, Extracellular, S1, S2 and S3 topological domains.
- FRAG 2 refers to amino acids located between positions 195-367, which includes Cytoplasmic, Extracellular, S4, S5, S6, Pore, hA and hTW topological domains.
- FRAG 3 refers to amino acids located between positions 535-595, which includes Cytoplasmic, hB and hC topological domains.

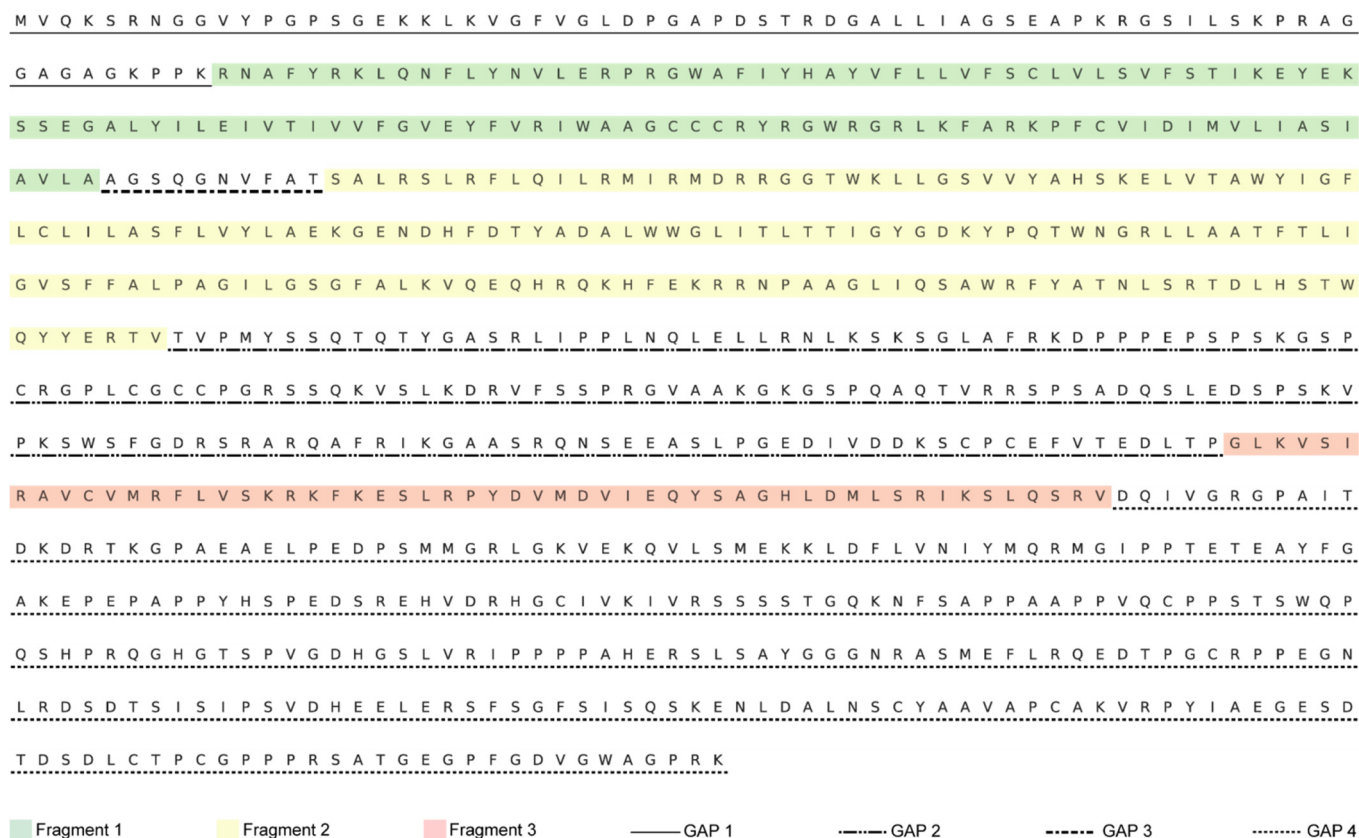

**Figure S3. Structural landscape of the *KCNQ2* gene (isoform 1).** The 4 GAPs correspond to regions with unsolved structure in the submitted 7CR3 PDB file, while the 3 fragments correspond to a set of residues already solved in the crystallographic structure.

## 2. Secondary structure affected by the mutation (*secondary str*)

In order to understand the secondary structure affected by the mutation, it was necessary to combine the crystallographic structure of *KCNQ2* with secondary structure prediction softwares. Although there are several softwares for this purpose, the PROTEUS2 metasever (<http://www.proteus2.ca/proteus2/>) (Montgomerie et al., 2008) was used. This software allows receiving the 7CR3 PDB file as input and modelling its unknown regions by homology modelling. The obtained results are shown in Figure S4.





### 3. AlphaFold2 pLDDT score (*plddt*)

The prediction of the 3D structure of the Kv7.2 channel was performed using AlphaFold2 [Jumper *et al.*, 2021], the software of choice in this field. In addition to returning the 3D coordinates file, AlphaFold produces a per-residue estimate of its confidence on a scale from 0 - 100. This confidence measure is called pLDDT and corresponds to the model's predicted score on the IDDT-C $\alpha$  metric, which is a superposition-free score that evaluates local distance differences of all atoms in a model, including validation of stereochemical plausibility (Mariani *et al.*, 2013).

AlphaFold Protein Structure Database (<https://alphafold.ebi.ac.uk/>) (Varadi *et al.*, 2021) provides guidance on the expected reliability of a given region, i.e., regions with pLDDT > 90 are expected to be modelled to high accuracy and regions with pLDDT between 70 and 90 are expected to be modelled well (a generally good backbone prediction). However, regions with pLDDT between 50 and 70 are low confidence and should be treated with caution and regions with pLDDT < 50 often have a ribbon-like appearance and should not be interpreted (probably suggesting that such region is either unstructured in physiological conditions or only structured as part of a complex).

The pLDDT score obtained with AlphaFold2 for each residue of the *KCNQ2* gene is provided in Data S4.

## Reference List

1. (2022). UniProt: the Universal Protein Knowledgebase in 2023. *Nucleic Acids Res.*
2. Berman, H., Henrick, K., and Nakamura, H. (2003). Announcing the worldwide Protein Data Bank. *Nat. Struct. Biol.* 10, 980.
3. Bogardt, R.A., Jr., Jones, B.N., Dwulet, F.E., Garner, W.H., Lehman, L.D., and Gurd, F.R. (1980). Evolution of the amino acid substitution in the mammalian myoglobin gene. *J. Mol. Evol.* 15, 197-218.
4. Capra, J.A. and Singh, M. (2007). Predicting functionally important residues from sequence conservation. *Bioinformatics.* 23, 1875-1882.
5. Jalalvand, E., Robertson, B., Tostivint, H., Wallen, P., and Grillner, S. (2016). The Spinal Cord Has an Intrinsic System for the Control of pH. *Curr. Biol.* 26, 1346-1351.
6. Kyte, J. and Doolittle, R.F. (1982). A simple method for displaying the hydropathic character of a protein. *J. Mol. Biol.* 157, 105-132.
7. Mariani, V., Biasini, M., Barbato, A., and Schwede, T. (2013). IDDT: a local superposition-free score for comparing protein structures and models using distance difference tests. *Bioinformatics.* 29, 2722-2728.
8. Montgomerie, S., Cruz, J.A., Shrivastava, S., Arndt, D., Berjanskii, M., and Wishart, D.S. (2008). PROTEUS2: a web server for comprehensive protein structure prediction and structure-based annotation. *Nucleic Acids Res.* 36, W202-W209.
9. Sievers, F. and Higgins, D.G. (2018). Clustal Omega for making accurate alignments of many protein sequences. *Protein Sci.* 27, 135-145.
10. Varadi, M., Anyango, S., Deshpande, M., Nair, S., Natassia, C., Yordanova, G., Yuan, D., Stroe, O., Wood, G., Laydon, A., Zidek, A., Green, T., Tunyasuvunakool, K., Petersen, S., Jumper, J., Clancy, E., Green, R., Vora, A., Lutfi, M., Figurnov, M., Cowie, A., Hobbs, N., Kohli, P., Kleywegt, G., Birney, E., Hassabis, D., and Velankar, S. (2021). AlphaFold Protein Structure Database: massively expanding the structural coverage of protein-sequence space with high-accuracy models. *Nucleic Acids Res.*
