# Supplementary material for: MLe-KCNQ2: An Artificial Intelligence Model for the Prognosis of Missense KCNQ2 Gene Variants
Source: Int J Mol Sci. 2024 Mar 2;25(5):2910. doi: 10.3390/ijms25052910 (PMC10932340; doi:10.3390/ijms25052910)
Supplement: Supplementary file 1 [file ijms-25-02910-s001.zip]

Archive with 11 entries (11 files):
- AlphaFold2_KCNQ2_Prediction.pdb
- AUC_ROC_Scores.xlsx
- Description Supplemental Material.pdf
- Supp_Alignment.xlsx
- Supp_Data_1_FINAL_DATASET_KCNQ2.xlsx
- Supp_Data_2_KCNQ2_Performance_Tools.xlsx
- Supp_Data_3_KCNQ2_All_Predictions.xlsx
- Supp_Data_4_All_Possible_Predictions_no_codon.xlsx
- Supp_Data_5_All_Possible_Predictions.csv
- Supp_Feature_Description.pdf
- Supp_Species_UniProt_Codes.xlsx
