# Supplementary material for: MLe-KCNQ2: An Artificial Intelligence Model for the Prognosis of Missense KCNQ2 Gene Variants
Source: Int J Mol Sci. 2024 Mar 2;25(5):2910. doi: 10.3390/ijms25052910 (PMC10932340; doi:10.3390/ijms25052910)
Supplement: Supplementary file 1 [file ijms-25-02910-s001.zip › AlphaFold2_KCNQ2_Prediction.pdb]

ATOM      1  N   MET A   1     -25.218  53.093   8.059  1.00 36.11           N  
ATOM      2  H   MET A   1     -24.705  53.655   7.394  1.00 36.11           H  
ATOM      3  H2  MET A   1     -25.194  52.134   7.745  1.00 36.11           H  
ATOM      4  H3  MET A   1     -26.178  53.404   8.104  1.00 36.11           H  
ATOM      5  CA  MET A   1     -24.586  53.169   9.398  1.00 36.11           C  
ATOM      6  HA  MET A   1     -24.513  54.219   9.681  1.00 36.11           H  
ATOM      7  C   MET A   1     -23.166  52.602   9.254  1.00 36.11           C  
ATOM      8  CB  MET A   1     -25.443  52.442  10.454  1.00 36.11           C  
ATOM      9  HB2 MET A   1     -25.575  51.398  10.171  1.00 36.11           H  
ATOM     10  HB3 MET A   1     -24.928  52.475  11.415  1.00 36.11           H  
ATOM     11  O   MET A   1     -23.012  51.717   8.424  1.00 36.11           O  
ATOM     12  CG  MET A   1     -26.821  53.092  10.674  1.00 36.11           C  
ATOM     13  HG2 MET A   1     -26.674  54.139  10.939  1.00 36.11           H  
ATOM     14  HG3 MET A   1     -27.289  52.602  11.528  1.00 36.11           H  
ATOM     15  SD  MET A   1     -27.985  53.003   9.279  1.00 36.11           S  
ATOM     16  CE  MET A   1     -29.414  53.870   9.988  1.00 36.11           C  
ATOM     17  HE1 MET A   1     -30.222  53.901   9.257  1.00 36.11           H  
ATOM     18  HE2 MET A   1     -29.760  53.346  10.878  1.00 36.11           H  
ATOM     19  HE3 MET A   1     -29.137  54.890  10.256  1.00 36.11           H  
ATOM     20  N   VAL A   2     -22.076  53.142   9.823  1.00 33.02           N  
ATOM     21  H   VAL A   2     -21.232  52.730   9.449  1.00 33.02           H  
ATOM     22  CA  VAL A   2     -21.860  53.829  11.126  1.00 33.02           C  
ATOM     23  HA  VAL A   2     -20.843  54.219  11.082  1.00 33.02           H  
ATOM     24  C   VAL A   2     -21.874  52.799  12.277  1.00 33.02           C  
ATOM     25  CB  VAL A   2     -22.778  55.060  11.344  1.00 33.02           C  
ATOM     26  HB  VAL A   2     -23.811  54.722  11.424  1.00 33.02           H  
ATOM     27  O   VAL A   2     -22.730  51.926  12.268  1.00 33.02           O  
ATOM     28  CG1 VAL A   2     -22.483  55.861  12.613  1.00 33.02           C  
ATOM     29 HG11 VAL A   2     -23.209  56.667  12.716  1.00 33.02           H  
ATOM     30 HG12 VAL A   2     -21.488  56.306  12.576  1.00 33.02           H  
ATOM     31 HG13 VAL A   2     -22.582  55.229  13.495  1.00 33.02           H  
ATOM     32  CG2 VAL A   2     -22.665  56.049  10.170  1.00 33.02           C  
ATOM     33 HG21 VAL A   2     -22.923  55.581   9.220  1.00 33.02           H  
ATOM     34 HG22 VAL A   2     -23.339  56.889  10.331  1.00 33.02           H  
ATOM     35 HG23 VAL A   2     -21.647  56.432  10.104  1.00 33.02           H  
ATOM     36  N   GLN A   3     -20.954  52.790  13.251  1.00 40.41           N  
ATOM     37  H   GLN A   3     -21.048  52.008  13.884  1.00 40.41           H  
ATOM     38  CA  GLN A   3     -19.949  53.805  13.625  1.00 40.41           C  
ATOM     39  HA  GLN A   3     -20.114  54.694  13.016  1.00 40.41           H  
ATOM     40  C   GLN A   3     -18.479  53.393  13.333  1.00 40.41           C  
ATOM     41  CB  GLN A   3     -20.237  54.218  15.090  1.00 40.41           C  
ATOM     42  HB2 GLN A   3     -21.316  54.187  15.241  1.00 40.41           H  
ATOM     43  HB3 GLN A   3     -19.810  53.485  15.773  1.00 40.41           H  
ATOM     44  O   GLN A   3     -18.205  52.760  12.316  1.00 40.41           O  
ATOM     45  CG  GLN A   3     -19.727  55.631  15.463  1.00 40.41           C  
ATOM     46  HG2 GLN A   3     -18.794  55.539  16.019  1.00 40.41           H  
ATOM     47  HG3 GLN A   3     -19.525  56.210  14.562  1.00 40.41           H  
ATOM     48  CD  GLN A   3     -20.724  56.434  16.298  1.00 40.41           C  
ATOM     49  NE2 GLN A   3     -20.290  57.133  17.323  1.00 40.41           N  
ATOM     50 HE21 GLN A   3     -19.323  57.115  17.614  1.00 40.41           H  
ATOM     51 HE22 GLN A   3     -20.996  57.643  17.833  1.00 40.41           H  
ATOM     52  OE1 GLN A   3     -21.907  56.471  16.016  1.00 40.41           O  
ATOM     53  N   LYS A   4     -17.528  53.880  14.146  1.00 37.31           N  
ATOM     54  H   LYS A   4     -17.853  54.311  14.999  1.00 37.31           H  
ATOM     55  CA  LYS A   4     -16.050  53.882  14.004  1.00 37.31           C  
ATOM     56  HA  LYS A   4     -15.714  52.879  13.739  1.00 37.31           H  
ATOM     57  C   LYS A   4     -15.460  54.253  15.404  1.00 37.31           C  
ATOM     58  CB  LYS A   4     -15.713  54.888  12.877  1.00 37.31           C  
ATOM     59  HB2 LYS A   4     -15.366  55.829  13.306  1.00 37.31           H  
ATOM     60  HB3 LYS A   4     -16.615  55.139  12.319  1.00 37.31           H  
ATOM     61  O   LYS A   4     -16.259  54.520  16.294  1.00 37.31           O  
ATOM     62  CG  LYS A   4     -14.711  54.337  11.848  1.00 37.31           C  
ATOM     63  HG2 LYS A   4     -15.161  53.485  11.339  1.00 37.31           H  
ATOM     64  HG3 LYS A   4     -13.805  53.994  12.348  1.00 37.31           H  
ATOM     65  CD  LYS A   4     -14.333  55.404  10.810  1.00 37.31           C  
ATOM     66  HD2 LYS A   4     -13.941  56.281  11.324  1.00 37.31           H  
ATOM     67  HD3 LYS A   4     -15.224  55.687  10.250  1.00 37.31           H  
ATOM     68  CE  LYS A   4     -13.267  54.854   9.852  1.00 37.31           C  
ATOM     69  HE2 LYS A   4     -12.389  54.578  10.436  1.00 37.31           H  
ATOM     70  HE3 LYS A   4     -13.655  53.948   9.387  1.00 37.31           H  
ATOM     71  NZ  LYS A   4     -12.897  55.844   8.806  1.00 37.31           N  
ATOM     72  HZ1 LYS A   4     -12.200  55.462   8.183  1.00 37.31           H  
ATOM     73  HZ2 LYS A   4     -13.703  56.098   8.254  1.00 37.31           H  
ATOM     74  HZ3 LYS A   4     -12.521  56.685   9.223  1.00 37.31           H  
ATOM     75  N   SER A   5     -14.159  54.336  15.725  1.00 38.29           N  
ATOM     76  H   SER A   5     -14.025  54.462  16.718  1.00 38.29           H  
ATOM     77  CA  SER A   5     -12.886  54.327  14.972  1.00 38.29           C  
ATOM     78  HA  SER A   5     -12.906  53.572  14.186  1.00 38.29           H  
ATOM     79  C   SER A   5     -11.687  54.049  15.910  1.00 38.29           C  
ATOM     80  CB  SER A   5     -12.628  55.736  14.412  1.00 38.29           C  
ATOM     81  HB2 SER A   5     -12.159  56.350  15.181  1.00 38.29           H  
ATOM     82  HB3 SER A   5     -13.564  56.227  14.145  1.00 38.29           H  
ATOM     83  O   SER A   5     -11.857  54.162  17.119  1.00 38.29           O  
ATOM     84  OG  SER A   5     -11.794  55.690  13.268  1.00 38.29           O  
ATOM     85  HG  SER A   5     -11.386  56.554  13.179  1.00 38.29           H  
ATOM     86  N   ARG A   6     -10.473  53.867  15.342  1.00 40.24           N  
ATOM     87  H   ARG A   6     -10.469  53.838  14.332  1.00 40.24           H  
ATOM     88  CA  ARG A   6      -9.152  53.709  16.023  1.00 40.24           C  
ATOM     89  HA  ARG A   6      -8.385  53.603  15.256  1.00 40.24           H  
ATOM     90  C   ARG A   6      -9.023  52.430  16.882  1.00 40.24           C  
ATOM     91  CB  ARG A   6      -8.814  54.990  16.823  1.00 40.24           C  
ATOM     92  HB2 ARG A   6      -7.918  54.804  17.415  1.00 40.24           H  
ATOM     93  HB3 ARG A   6      -9.611  55.222  17.529  1.00 40.24           H  
ATOM     94  O   ARG A   6     -10.029  51.865  17.281  1.00 40.24           O  
ATOM     95  CG  ARG A   6      -8.565  56.207  15.913  1.00 40.24           C  
ATOM     96  HG2 ARG A   6      -7.842  55.929  15.147  1.00 40.24           H  
ATOM     97  HG3 ARG A   6      -9.492  56.498  15.419  1.00 40.24           H  
ATOM     98  CD  ARG A   6      -8.019  57.406  16.706  1.00 40.24           C  
ATOM     99  HD2 ARG A   6      -7.289  57.043  17.430  1.00 40.24           H  
ATOM    100  HD3 ARG A   6      -8.841  57.868  17.253  1.00 40.24           H  
ATOM    101  NE  ARG A   6      -7.340  58.379  15.820  1.00 40.24           N  
ATOM    102  HE  ARG A   6      -6.753  57.979  15.103  1.00 40.24           H  
ATOM    103  NH1 ARG A   6      -7.923  60.339  16.890  1.00 40.24           N  
ATOM    104 HH11 ARG A   6      -7.829  61.340  16.991  1.00 40.24           H  
ATOM    105 HH12 ARG A   6      -8.447  59.820  17.579  1.00 40.24           H  
ATOM    106  NH2 ARG A   6      -6.548  60.405  15.141  1.00 40.24           N  
ATOM    107 HH21 ARG A   6      -6.004  59.966  14.411  1.00 40.24           H  
ATOM    108 HH22 ARG A   6      -6.456  61.400  15.286  1.00 40.24           H  
ATOM    109  CZ  ARG A   6      -7.279  59.696  15.955  1.00 40.24           C  
ATOM    110  N   ASN A   7      -7.840  51.872  17.171  1.00 39.60           N  
ATOM    111  H   ASN A   7      -7.950  51.051  17.748  1.00 39.60           H  
ATOM    112  CA  ASN A   7      -6.455  52.028  16.664  1.00 39.60           C  
ATOM    113  HA  ASN A   7      -6.456  52.400  15.640  1.00 39.60           H  
ATOM    114  C   ASN A   7      -5.813  50.605  16.647  1.00 39.60           C  
ATOM    115  CB  ASN A   7      -5.664  52.980  17.599  1.00 39.60           C  
ATOM    116  HB2 ASN A   7      -6.223  53.156  18.518  1.00 39.60           H  
ATOM    117  HB3 ASN A   7      -4.734  52.497  17.897  1.00 39.60           H  
ATOM    118  O   ASN A   7      -6.371  49.699  17.255  1.00 39.60           O  
ATOM    119  CG  ASN A   7      -5.296  54.326  16.995  1.00 39.60           C  
ATOM    120  ND2 ASN A   7      -4.506  55.105  17.694  1.00 39.60           N  
ATOM    121 HD21 ASN A   7      -4.166  55.949  17.255  1.00 39.60           H  
ATOM    122 HD22 ASN A   7      -4.091  54.756  18.546  1.00 39.60           H  
ATOM    123  OD1 ASN A   7      -5.723  54.710  15.916  1.00 39.60           O  
ATOM    124  N   GLY A   8      -4.690  50.283  15.989  1.00 38.72           N  
ATOM    125  H   GLY A   8      -4.433  49.317  16.135  1.00 38.72           H  
ATOM    126  CA  GLY A   8      -3.706  51.091  15.251  1.00 38.72           C  
ATOM    127  HA2 GLY A   8      -3.532  50.642  14.273  1.00 38.72           H  
ATOM    128  HA3 GLY A   8      -4.082  52.103  15.099  1.00 38.72           H  
ATOM    129  C   GLY A   8      -2.373  51.188  16.016  1.00 38.72           C  
ATOM    130  O   GLY A   8      -2.366  51.798  17.078  1.00 38.72           O  
ATOM    131  N   GLY A   9      -1.238  50.642  15.553  1.00 38.85           N  
ATOM    132  H   GLY A   9      -0.457  50.713  16.189  1.00 38.85           H  
ATOM    133  CA  GLY A   9      -0.939  49.892  14.314  1.00 38.85           C  
ATOM    134  HA2 GLY A   9      -1.101  50.537  13.450  1.00 38.85           H  
ATOM    135  HA3 GLY A   9      -1.591  49.022  14.239  1.00 38.85           H  
ATOM    136  C   GLY A   9       0.529  49.398  14.303  1.00 38.85           C  
ATOM    137  O   GLY A   9       1.075  49.231  15.385  1.00 38.85           O  
ATOM    138  N   VAL A  10       1.162  49.259  13.115  1.00 36.89           N  
ATOM    139  H   VAL A  10       0.612  49.427  12.285  1.00 36.89           H  
ATOM    140  CA  VAL A  10       2.612  48.934  12.893  1.00 36.89           C  
ATOM    141  HA  VAL A  10       2.799  49.038  11.825  1.00 36.89           H  
ATOM    142  C   VAL A  10       3.003  47.468  13.242  1.00 36.89           C  
ATOM    143  CB  VAL A  10       3.487  50.016  13.599  1.00 36.89           C  
ATOM    144  HB  VAL A  10       3.220  50.072  14.655  1.00 36.89           H  
ATOM    145  O   VAL A  10       2.545  46.947  14.247  1.00 36.89           O  
ATOM    146  CG1 VAL A  10       4.999  49.806  13.580  1.00 36.89           C  
ATOM    147 HG11 VAL A  10       5.394  49.915  12.570  1.00 36.89           H  
ATOM    148 HG12 VAL A  10       5.473  50.559  14.210  1.00 36.89           H  
ATOM    149 HG13 VAL A  10       5.248  48.832  14.002  1.00 36.89           H  
ATOM    150  CG2 VAL A  10       3.228  51.399  12.976  1.00 36.89           C  
ATOM    151 HG21 VAL A  10       3.878  52.140  13.441  1.00 36.89           H  
ATOM    152 HG22 VAL A  10       3.431  51.378  11.905  1.00 36.89           H  
ATOM    153 HG23 VAL A  10       2.197  51.707  13.149  1.00 36.89           H  
ATOM    154  N   TYR A  11       3.795  46.690  12.474  1.00 34.74           N  
ATOM    155  H   TYR A  11       3.939  45.780  12.887  1.00 34.74           H  
ATOM    156  CA  TYR A  11       4.357  46.794  11.100  1.00 34.74           C  
ATOM    157  HA  TYR A  11       3.702  47.433  10.507  1.00 34.74           H  
ATOM    158  C   TYR A  11       4.427  45.383  10.425  1.00 34.74           C  
ATOM    159  CB  TYR A  11       5.782  47.388  11.141  1.00 34.74           C  
ATOM    160  HB2 TYR A  11       5.966  47.869  12.102  1.00 34.74           H  
ATOM    161  HB3 TYR A  11       6.503  46.571  11.102  1.00 34.74           H  
ATOM    162  O   TYR A  11       4.218  44.396  11.132  1.00 34.74           O  
ATOM    163  CG  TYR A  11       6.108  48.386  10.038  1.00 34.74           C  
ATOM    164  CD1 TYR A  11       7.269  48.219   9.256  1.00 34.74           C  
ATOM    165  HD1 TYR A  11       7.930  47.384   9.437  1.00 34.74           H  
ATOM    166  CD2 TYR A  11       5.263  49.490   9.797  1.00 34.74           C  
ATOM    167  HD2 TYR A  11       4.385  49.651  10.405  1.00 34.74           H  
ATOM    168  CE1 TYR A  11       7.580  49.139   8.235  1.00 34.74           C  
ATOM    169  HE1 TYR A  11       8.474  49.007   7.643  1.00 34.74           H  
ATOM    170  CE2 TYR A  11       5.566  50.408   8.774  1.00 34.74           C  
ATOM    171  HE2 TYR A  11       4.933  51.263   8.588  1.00 34.74           H  
ATOM    172  OH  TYR A  11       7.010  51.132   7.012  1.00 34.74           O  
ATOM    173  HH  TYR A  11       7.851  50.952   6.586  1.00 34.74           H  
ATOM    174  CZ  TYR A  11       6.726  50.237   7.992  1.00 34.74           C  
ATOM    175  N   PRO A  12       4.703  45.234   9.103  1.00 44.13           N  
ATOM    176  CA  PRO A  12       4.565  43.944   8.396  1.00 44.13           C  
ATOM    177  HA  PRO A  12       4.183  43.171   9.062  1.00 44.13           H  
ATOM    178  C   PRO A  12       5.821  43.384   7.675  1.00 44.13           C  
ATOM    179  CB  PRO A  12       3.498  44.270   7.351  1.00 44.13           C  
ATOM    180  HB2 PRO A  12       3.488  43.559   6.525  1.00 44.13           H  
ATOM    181  HB3 PRO A  12       2.520  44.310   7.830  1.00 44.13           H  
ATOM    182  O   PRO A  12       6.669  44.136   7.202  1.00 44.13           O  
ATOM    183  CG  PRO A  12       3.903  45.675   6.888  1.00 44.13           C  
ATOM    184  HG2 PRO A  12       3.029  46.259   6.599  1.00 44.13           H  
ATOM    185  HG3 PRO A  12       4.602  45.607   6.054  1.00 44.13           H  
ATOM    186  CD  PRO A  12       4.609  46.293   8.101  1.00 44.13           C  
ATOM    187  HD2 PRO A  12       5.607  46.625   7.812  1.00 44.13           H  
ATOM    188  HD3 PRO A  12       4.025  47.140   8.458  1.00 44.13           H  
ATOM    189  N   GLY A  13       5.842  42.059   7.444  1.00 38.16           N  
ATOM    190  H   GLY A  13       5.206  41.480   7.974  1.00 38.16           H  
ATOM    191  CA  GLY A  13       6.656  41.376   6.413  1.00 38.16           C  
ATOM    192  HA2 GLY A  13       7.449  42.039   6.069  1.00 38.16           H  
ATOM    193  HA3 GLY A  13       6.009  41.157   5.564  1.00 38.16           H  
ATOM    194  C   GLY A  13       7.317  40.059   6.872  1.00 38.16           C  
ATOM    195  O   GLY A  13       7.392  39.827   8.077  1.00 38.16           O  
ATOM    196  N   PRO A  14       7.824  39.195   5.958  1.00 39.99           N  
ATOM    197  CA  PRO A  14       7.749  39.238   4.492  1.00 39.99           C  
ATOM    198  HA  PRO A  14       7.465  40.229   4.137  1.00 39.99           H  
ATOM    199  C   PRO A  14       6.722  38.213   3.925  1.00 39.99           C  
ATOM    200  CB  PRO A  14       9.207  38.984   4.083  1.00 39.99           C  
ATOM    201  HB2 PRO A  14       9.794  39.883   4.273  1.00 39.99           H  
ATOM    202  HB3 PRO A  14       9.331  38.684   3.042  1.00 39.99           H  
ATOM    203  O   PRO A  14       5.603  38.114   4.424  1.00 39.99           O  
ATOM    204  CG  PRO A  14       9.633  37.889   5.061  1.00 39.99           C  
ATOM    205  HG2 PRO A  14      10.707  37.916   5.246  1.00 39.99           H  
ATOM    206  HG3 PRO A  14       9.338  36.912   4.677  1.00 39.99           H  
ATOM    207  CD  PRO A  14       8.834  38.207   6.330  1.00 39.99           C  
ATOM    208  HD2 PRO A  14       8.361  37.304   6.719  1.00 39.99           H  
ATOM    209  HD3 PRO A  14       9.502  38.624   7.083  1.00 39.99           H  
ATOM    210  N   SER A  15       7.045  37.508   2.831  1.00 32.78           N  
ATOM    211  H   SER A  15       7.999  37.552   2.502  1.00 32.78           H  
ATOM    212  CA  SER A  15       6.159  36.620   2.053  1.00 32.78           C  
ATOM    213  HA  SER A  15       5.155  37.044   2.078  1.00 32.78           H  
ATOM    214  C   SER A  15       6.055  35.176   2.591  1.00 32.78           C  
ATOM    215  CB  SER A  15       6.632  36.625   0.590  1.00 32.78           C  
ATOM    216  HB2 SER A  15       6.087  35.873   0.019  1.00 32.78           H  
ATOM    217  HB3 SER A  15       6.433  37.606   0.160  1.00 32.78           H  
ATOM    218  O   SER A  15       6.963  34.685   3.253  1.00 32.78           O  
ATOM    219  OG  SER A  15       8.023  36.372   0.516  1.00 32.78           O  
ATOM    220  HG  SER A  15       8.329  36.424  -0.393  1.00 32.78           H  
ATOM    221  N   GLY A  16       4.944  34.473   2.290  1.00 36.08           N  
ATOM    222  H   GLY A  16       4.207  34.942   1.783  1.00 36.08           H  
ATOM    223  CA  GLY A  16       4.624  33.173   2.920  1.00 36.08           C  
ATOM    224  HA2 GLY A  16       5.555  32.632   3.089  1.00 36.08           H  
ATOM    225  HA3 GLY A  16       4.184  33.365   3.898  1.00 36.08           H  
ATOM    226  C   GLY A  16       3.689  32.204   2.166  1.00 36.08           C  
ATOM    227  O   GLY A  16       3.008  31.413   2.813  1.00 36.08           O  
ATOM    228  N   GLU A  17       3.666  32.221   0.824  1.00 34.07           N  
ATOM    229  H   GLU A  17       4.306  32.854   0.366  1.00 34.07           H  
ATOM    230  CA  GLU A  17       2.917  31.251  -0.023  1.00 34.07           C  
ATOM    231  HA  GLU A  17       3.107  31.542  -1.056  1.00 34.07           H  
ATOM    232  C   GLU A  17       1.360  31.288   0.109  1.00 34.07           C  
ATOM    233  CB  GLU A  17       3.547  29.845   0.157  1.00 34.07           C  
ATOM    234  HB2 GLU A  17       4.433  29.925   0.787  1.00 34.07           H  
ATOM    235  HB3 GLU A  17       2.851  29.188   0.678  1.00 34.07           H  
ATOM    236  O   GLU A  17       0.801  32.082   0.866  1.00 34.07           O  
ATOM    237  CG  GLU A  17       4.014  29.179  -1.147  1.00 34.07           C  
ATOM    238  HG2 GLU A  17       4.471  29.920  -1.803  1.00 34.07           H  
ATOM    239  HG3 GLU A  17       4.778  28.441  -0.901  1.00 34.07           H  
ATOM    240  CD  GLU A  17       2.859  28.471  -1.850  1.00 34.07           C  
ATOM    241  OE1 GLU A  17       2.097  29.148  -2.569  1.00 34.07           O  
ATOM    242  OE2 GLU A  17       2.656  27.266  -1.580  1.00 34.07           O  
ATOM    243  N   LYS A  18       0.620  30.529  -0.726  1.00 29.29           N  
ATOM    244  H   LYS A  18       1.125  29.959  -1.389  1.00 29.29           H  
ATOM    245  CA  LYS A  18      -0.840  30.667  -0.953  1.00 29.29           C  
ATOM    246  HA  LYS A  18      -1.287  31.072  -0.046  1.00 29.29           H  
ATOM    247  C   LYS A  18      -1.579  29.336  -1.243  1.00 29.29           C  
ATOM    248  CB  LYS A  18      -1.086  31.678  -2.099  1.00 29.29           C  
ATOM    249  HB2 LYS A  18      -2.158  31.733  -2.290  1.00 29.29           H  
ATOM    250  HB3 LYS A  18      -0.600  31.309  -3.002  1.00 29.29           H  
ATOM    251  O   LYS A  18      -2.275  29.208  -2.252  1.00 29.29           O  
ATOM    252  CG  LYS A  18      -0.600  33.108  -1.817  1.00 29.29           C  
ATOM    253  HG2 LYS A  18       0.483  33.108  -1.688  1.00 29.29           H  
ATOM    254  HG3 LYS A  18      -1.068  33.476  -0.904  1.00 29.29           H  
ATOM    255  CD  LYS A  18      -0.941  34.048  -2.981  1.00 29.29           C  
ATOM    256  HD2 LYS A  18      -2.023  34.095  -3.108  1.00 29.29           H  
ATOM    257  HD3 LYS A  18      -0.488  33.657  -3.892  1.00 29.29           H  
ATOM    258  CE  LYS A  18      -0.386  35.448  -2.688  1.00 29.29           C  
ATOM    259  HE2 LYS A  18       0.671  35.350  -2.439  1.00 29.29           H  
ATOM    260  HE3 LYS A  18      -0.893  35.850  -1.812  1.00 29.29           H  
ATOM    261  NZ  LYS A  18      -0.544  36.364  -3.848  1.00 29.29           N  
ATOM    262  HZ1 LYS A  18      -1.518  36.480  -4.088  1.00 29.29           H  
ATOM    263  HZ2 LYS A  18      -0.157  37.273  -3.636  1.00 29.29           H  
ATOM    264  HZ3 LYS A  18      -0.054  36.001  -4.653  1.00 29.29           H  
ATOM    265  N   LYS A  19      -1.515  28.337  -0.351  1.00 33.30           N  
ATOM    266  H   LYS A  19      -0.927  28.476   0.458  1.00 33.30           H  
ATOM    267  CA  LYS A  19      -2.283  27.072  -0.500  1.00 33.30           C  
ATOM    268  HA  LYS A  19      -2.369  26.873  -1.569  1.00 33.30           H  
ATOM    269  C   LYS A  19      -3.730  27.173   0.027  1.00 33.30           C  
ATOM    270  CB  LYS A  19      -1.505  25.886   0.101  1.00 33.30           C  
ATOM    271  HB2 LYS A  19      -2.158  25.013   0.116  1.00 33.30           H  
ATOM    272  HB3 LYS A  19      -1.213  26.117   1.125  1.00 33.30           H  
ATOM    273  O   LYS A  19      -3.965  27.567   1.168  1.00 33.30           O  
ATOM    274  CG  LYS A  19      -0.256  25.549  -0.739  1.00 33.30           C  
ATOM    275  HG2 LYS A  19       0.427  26.397  -0.715  1.00 33.30           H  
ATOM    276  HG3 LYS A  19      -0.562  25.376  -1.770  1.00 33.30           H  
ATOM    277  CD  LYS A  19       0.475  24.296  -0.225  1.00 33.30           C  
ATOM    278  HD2 LYS A  19       0.904  24.498   0.756  1.00 33.30           H  
ATOM    279  HD3 LYS A  19      -0.253  23.492  -0.118  1.00 33.30           H  
ATOM    280  CE  LYS A  19       1.573  23.804  -1.187  1.00 33.30           C  
ATOM    281  HE2 LYS A  19       1.156  23.748  -2.193  1.00 33.30           H  
ATOM    282  HE3 LYS A  19       1.869  22.798  -0.891  1.00 33.30           H  
ATOM    283  NZ  LYS A  19       2.772  24.677  -1.195  1.00 33.30           N  
ATOM    284  HZ1 LYS A  19       3.467  24.385  -1.868  1.00 33.30           H  
ATOM    285  HZ2 LYS A  19       3.203  24.770  -0.287  1.00 33.30           H  
ATOM    286  HZ3 LYS A  19       2.530  25.621  -1.460  1.00 33.30           H  
ATOM    287  N   LEU A  20      -4.718  26.788  -0.792  1.00 32.13           N  
ATOM    288  H   LEU A  20      -4.461  26.483  -1.720  1.00 32.13           H  
ATOM    289  CA  LEU A  20      -6.152  26.987  -0.507  1.00 32.13           C  
ATOM    290  HA  LEU A  20      -6.270  27.996  -0.112  1.00 32.13           H  
ATOM    291  C   LEU A  20      -6.701  26.020   0.565  1.00 32.13           C  
ATOM    292  CB  LEU A  20      -6.985  26.908  -1.805  1.00 32.13           C  
ATOM    293  HB2 LEU A  20      -8.010  26.665  -1.525  1.00 32.13           H  
ATOM    294  HB3 LEU A  20      -6.619  26.092  -2.428  1.00 32.13           H  
ATOM    295  O   LEU A  20      -6.863  24.820   0.339  1.00 32.13           O  
ATOM    296  CG  LEU A  20      -7.041  28.213  -2.626  1.00 32.13           C  
ATOM    297  HG  LEU A  20      -7.377  29.023  -1.979  1.00 32.13           H  
ATOM    298  CD1 LEU A  20      -5.699  28.600  -3.244  1.00 32.13           C  
ATOM    299 HD11 LEU A  20      -5.301  27.782  -3.846  1.00 32.13           H  
ATOM    300 HD12 LEU A  20      -5.823  29.476  -3.881  1.00 32.13           H  
ATOM    301 HD13 LEU A  20      -4.982  28.863  -2.466  1.00 32.13           H  
ATOM    302  CD2 LEU A  20      -8.056  28.056  -3.760  1.00 32.13           C  
ATOM    303 HD21 LEU A  20      -7.742  27.261  -4.437  1.00 32.13           H  
ATOM    304 HD22 LEU A  20      -8.126  28.989  -4.319  1.00 32.13           H  
ATOM    305 HD23 LEU A  20      -9.040  27.823  -3.352  1.00 32.13           H  
ATOM    306  N   LYS A  21      -7.069  26.573   1.726  1.00 28.57           N  
ATOM    307  H   LYS A  21      -6.874  27.559   1.827  1.00 28.57           H  
ATOM    308  CA  LYS A  21      -7.554  25.860   2.923  1.00 28.57           C  
ATOM    309  HA  LYS A  21      -6.981  24.938   3.016  1.00 28.57           H  
ATOM    310  C   LYS A  21      -9.036  25.452   2.814  1.00 28.57           C  
ATOM    311  CB  LYS A  21      -7.217  26.754   4.136  1.00 28.57           C  
ATOM    312  HB2 LYS A  21      -7.855  27.637   4.117  1.00 28.57           H  
ATOM    313  HB3 LYS A  21      -6.187  27.093   4.018  1.00 28.57           H  
ATOM    314  O   LYS A  21      -9.891  25.994   3.511  1.00 28.57           O  
ATOM    315  CG  LYS A  21      -7.327  26.083   5.517  1.00 28.57           C  
ATOM    316  HG2 LYS A  21      -8.368  25.847   5.736  1.00 28.57           H  
ATOM    317  HG3 LYS A  21      -6.741  25.164   5.520  1.00 28.57           H  
ATOM    318  CD  LYS A  21      -6.775  27.042   6.589  1.00 28.57           C  
ATOM    319  HD2 LYS A  21      -7.356  27.964   6.572  1.00 28.57           H  
ATOM    320  HD3 LYS A  21      -5.741  27.282   6.340  1.00 28.57           H  
ATOM    321  CE  LYS A  21      -6.817  26.443   8.002  1.00 28.57           C  
ATOM    322  HE2 LYS A  21      -7.858  26.266   8.274  1.00 28.57           H  
ATOM    323  HE3 LYS A  21      -6.303  25.482   7.987  1.00 28.57           H  
ATOM    324  NZ  LYS A  21      -6.171  27.346   8.996  1.00 28.57           N  
ATOM    325  HZ1 LYS A  21      -6.200  26.950   9.924  1.00 28.57           H  
ATOM    326  HZ2 LYS A  21      -5.202  27.505   8.760  1.00 28.57           H  
ATOM    327  HZ3 LYS A  21      -6.632  28.244   9.024  1.00 28.57           H  
ATOM    328  N   VAL A  22      -9.355  24.508   1.921  1.00 35.69           N  
ATOM    329  H   VAL A  22      -8.604  24.155   1.345  1.00 35.69           H  
ATOM    330  CA  VAL A  22     -10.731  24.013   1.684  1.00 35.69           C  
ATOM    331  HA  VAL A  22     -11.349  24.869   1.413  1.00 35.69           H  
ATOM    332  C   VAL A  22     -11.321  23.391   2.960  1.00 35.69           C  
ATOM    333  CB  VAL A  22     -10.784  23.014   0.508  1.00 35.69           C  
ATOM    334  HB  VAL A  22     -10.162  22.148   0.736  1.00 35.69           H  
ATOM    335  O   VAL A  22     -10.927  22.303   3.378  1.00 35.69           O  
ATOM    336  CG1 VAL A  22     -12.218  22.531   0.235  1.00 35.69           C  
ATOM    337 HG11 VAL A  22     -12.867  23.382   0.026  1.00 35.69           H  
ATOM    338 HG12 VAL A  22     -12.222  21.856  -0.621  1.00 35.69           H  
ATOM    339 HG13 VAL A  22     -12.604  21.987   1.097  1.00 35.69           H  
ATOM    340  CG2 VAL A  22     -10.269  23.652  -0.791  1.00 35.69           C  
ATOM    341 HG21 VAL A  22      -9.219  23.925  -0.687  1.00 35.69           H  
ATOM    342 HG22 VAL A  22     -10.848  24.544  -1.030  1.00 35.69           H  
ATOM    343 HG23 VAL A  22     -10.347  22.940  -1.612  1.00 35.69           H  
ATOM    344  N   GLY A  23     -12.263  24.099   3.587  1.00 30.09           N  
ATOM    345  H   GLY A  23     -12.491  25.010   3.216  1.00 30.09           H  
ATOM    346  CA  GLY A  23     -12.811  23.746   4.898  1.00 30.09           C  
ATOM    347  HA2 GLY A  23     -11.981  23.515   5.565  1.00 30.09           H  
ATOM    348  HA3 GLY A  23     -13.333  24.610   5.310  1.00 30.09           H  
ATOM    349  C   GLY A  23     -13.783  22.560   4.904  1.00 30.09           C  
ATOM    350  O   GLY A  23     -14.490  22.292   3.932  1.00 30.09           O  
ATOM    351  N   PHE A  24     -13.859  21.882   6.052  1.00 28.20           N  
ATOM    352  H   PHE A  24     -13.241  22.146   6.807  1.00 28.20           H  
ATOM    353  CA  PHE A  24     -14.858  20.857   6.351  1.00 28.20           C  
ATOM    354  HA  PHE A  24     -15.738  21.019   5.728  1.00 28.20           H  
ATOM    355  C   PHE A  24     -15.282  20.965   7.823  1.00 28.20           C  
ATOM    356  CB  PHE A  24     -14.284  19.471   6.016  1.00 28.20           C  
ATOM    357  HB2 PHE A  24     -13.417  19.278   6.648  1.00 28.20           H  
ATOM    358  HB3 PHE A  24     -13.936  19.477   4.983  1.00 28.20           H  
ATOM    359  O   PHE A  24     -14.478  20.716   8.719  1.00 28.20           O  
ATOM    360  CG  PHE A  24     -15.280  18.337   6.179  1.00 28.20           C  
ATOM    361  CD1 PHE A  24     -15.375  17.647   7.402  1.00 28.20           C  
ATOM    362  HD1 PHE A  24     -14.750  17.933   8.235  1.00 28.20           H  
ATOM    363  CD2 PHE A  24     -16.136  17.993   5.115  1.00 28.20           C  
ATOM    364  HD2 PHE A  24     -16.075  18.539   4.186  1.00 28.20           H  
ATOM    365  CE1 PHE A  24     -16.319  16.618   7.560  1.00 28.20           C  
ATOM    366  HE1 PHE A  24     -16.413  16.118   8.513  1.00 28.20           H  
ATOM    367  CE2 PHE A  24     -17.082  16.963   5.275  1.00 28.20           C  
ATOM    368  HE2 PHE A  24     -17.760  16.714   4.471  1.00 28.20           H  
ATOM    369  CZ  PHE A  24     -17.173  16.276   6.498  1.00 28.20           C  
ATOM    370  HZ  PHE A  24     -17.915  15.503   6.638  1.00 28.20           H  
ATOM    371  N   VAL A  25     -16.537  21.353   8.057  1.00 36.77           N  
ATOM    372  H   VAL A  25     -17.137  21.527   7.264  1.00 36.77           H  
ATOM    373  CA  VAL A  25     -17.176  21.386   9.386  1.00 36.77           C  
ATOM    374  HA  VAL A  25     -16.493  21.851  10.098  1.00 36.77           H  
ATOM    375  C   VAL A  25     -17.460  19.942   9.829  1.00 36.77           C  
ATOM    376  CB  VAL A  25     -18.479  22.218   9.321  1.00 36.77           C  
ATOM    377  HB  VAL A  25     -19.143  21.762   8.587  1.00 36.77           H  
ATOM    378  O   VAL A  25     -17.868  19.126   9.006  1.00 36.77           O  
ATOM    379  CG1 VAL A  25     -19.236  22.306  10.651  1.00 36.77           C  
ATOM    380 HG11 VAL A  25     -18.628  22.803  11.407  1.00 36.77           H  
ATOM    381 HG12 VAL A  25     -20.152  22.880  10.517  1.00 36.77           H  
ATOM    382 HG13 VAL A  25     -19.518  21.313  11.001  1.00 36.77           H  
ATOM    383  CG2 VAL A  25     -18.192  23.659   8.871  1.00 36.77           C  
ATOM    384 HG21 VAL A  25     -17.503  24.137   9.567  1.00 36.77           H  
ATOM    385 HG22 VAL A  25     -19.120  24.231   8.851  1.00 36.77           H  
ATOM    386 HG23 VAL A  25     -17.763  23.677   7.869  1.00 36.77           H  
ATOM    387  N   GLY A  26     -17.280  19.540  11.085  1.00 32.21           N  
ATOM    388  H   GLY A  26     -17.571  18.587  11.249  1.00 32.21           H  
ATOM    389  CA  GLY A  26     -16.936  20.310  12.289  1.00 32.21           C  
ATOM    390  HA2 GLY A  26     -17.080  21.382  12.153  1.00 32.21           H  
ATOM    391  HA3 GLY A  26     -15.893  20.134  12.554  1.00 32.21           H  
ATOM    392  C   GLY A  26     -17.836  19.845  13.436  1.00 32.21           C  
ATOM    393  O   GLY A  26     -19.042  19.713  13.245  1.00 32.21           O  
ATOM    394  N   LEU A  27     -17.249  19.500  14.581  1.00 32.35           N  
ATOM    395  H   LEU A  27     -16.284  19.771  14.702  1.00 32.35           H  
ATOM    396  CA  LEU A  27     -17.922  18.864  15.732  1.00 32.35           C  
ATOM    397  HA  LEU A  27     -18.962  19.190  15.755  1.00 32.35           H  
ATOM    398  C   LEU A  27     -17.302  19.356  17.052  1.00 32.35           C  
ATOM    399  CB  LEU A  27     -17.874  17.324  15.599  1.00 32.35           C  
ATOM    400  HB2 LEU A  27     -16.834  17.028  15.470  1.00 32.35           H  
ATOM    401  HB3 LEU A  27     -18.226  16.885  16.533  1.00 32.35           H  
ATOM    402  O   LEU A  27     -17.144  18.614  18.020  1.00 32.35           O  
ATOM    403  CG  LEU A  27     -18.718  16.717  14.462  1.00 32.35           C  
ATOM    404  HG  LEU A  27     -18.415  17.139  13.504  1.00 32.35           H  
ATOM    405  CD1 LEU A  27     -18.472  15.207  14.397  1.00 32.35           C  
ATOM    406 HD11 LEU A  27     -17.412  15.018  14.226  1.00 32.35           H  
ATOM    407 HD12 LEU A  27     -19.044  14.778  13.575  1.00 32.35           H  
ATOM    408 HD13 LEU A  27     -18.775  14.741  15.334  1.00 32.35           H  
ATOM    409  CD2 LEU A  27     -20.221  16.927  14.663  1.00 32.35           C  
ATOM    410 HD21 LEU A  27     -20.534  16.523  15.626  1.00 32.35           H  
ATOM    411 HD22 LEU A  27     -20.456  17.991  14.630  1.00 32.35           H  
ATOM    412 HD23 LEU A  27     -20.775  16.437  13.862  1.00 32.35           H  
ATOM    413  N   ASP A  28     -16.877  20.612  17.034  1.00 32.51           N  
ATOM    414  H   ASP A  28     -17.054  21.146  16.195  1.00 32.51           H  
ATOM    415  CA  ASP A  28     -15.998  21.243  18.005  1.00 32.51           C  
ATOM    416  HA  ASP A  28     -15.394  20.478  18.492  1.00 32.51           H  
ATOM    417  C   ASP A  28     -16.892  21.971  19.039  1.00 32.51           C  
ATOM    418  CB  ASP A  28     -15.029  22.134  17.205  1.00 32.51           C  
ATOM    419  HB2 ASP A  28     -14.312  22.582  17.893  1.00 32.51           H  
ATOM    420  HB3 ASP A  28     -15.585  22.939  16.724  1.00 32.51           H  
ATOM    421  O   ASP A  28     -17.584  22.925  18.678  1.00 32.51           O  
ATOM    422  CG  ASP A  28     -14.275  21.330  16.123  1.00 32.51           C  
ATOM    423  OD1 ASP A  28     -13.108  20.944  16.364  1.00 32.51           O  
ATOM    424  OD2 ASP A  28     -14.842  21.058  15.035  1.00 32.51           O  
ATOM    425  N   PRO A  29     -17.015  21.469  20.285  1.00 32.89           N  
ATOM    426  CA  PRO A  29     -18.306  21.451  20.994  1.00 32.89           C  
ATOM    427  HA  PRO A  29     -19.104  21.347  20.259  1.00 32.89           H  
ATOM    428  C   PRO A  29     -18.637  22.719  21.813  1.00 32.89           C  
ATOM    429  CB  PRO A  29     -18.261  20.160  21.829  1.00 32.89           C  
ATOM    430  HB2 PRO A  29     -18.915  20.175  22.701  1.00 32.89           H  
ATOM    431  HB3 PRO A  29     -18.513  19.310  21.195  1.00 32.89           H  
ATOM    432  O   PRO A  29     -19.108  22.612  22.943  1.00 32.89           O  
ATOM    433  CG  PRO A  29     -16.787  20.082  22.218  1.00 32.89           C  
ATOM    434  HG2 PRO A  29     -16.495  19.074  22.511  1.00 32.89           H  
ATOM    435  HG3 PRO A  29     -16.571  20.798  23.011  1.00 32.89           H  
ATOM    436  CD  PRO A  29     -16.109  20.516  20.920  1.00 32.89           C  
ATOM    437  HD2 PRO A  29     -15.141  20.971  21.129  1.00 32.89           H  
ATOM    438  HD3 PRO A  29     -15.986  19.636  20.289  1.00 32.89           H  
ATOM    439  N   GLY A  30     -18.397  23.913  21.262  1.00 29.86           N  
ATOM    440  H   GLY A  30     -18.045  23.923  20.316  1.00 29.86           H  
ATOM    441  CA  GLY A  30     -18.446  25.185  22.002  1.00 29.86           C  
ATOM    442  HA2 GLY A  30     -17.425  25.503  22.213  1.00 29.86           H  
ATOM    443  HA3 GLY A  30     -18.944  25.036  22.960  1.00 29.86           H  
ATOM    444  C   GLY A  30     -19.163  26.351  21.309  1.00 29.86           C  
ATOM    445  O   GLY A  30     -18.716  27.483  21.461  1.00 29.86           O  
ATOM    446  N   ALA A  31     -20.228  26.111  20.532  1.00 34.41           N  
ATOM    447  H   ALA A  31     -20.573  25.166  20.441  1.00 34.41           H  
ATOM    448  CA  ALA A  31     -20.969  27.174  19.834  1.00 34.41           C  
ATOM    449  HA  ALA A  31     -20.816  28.103  20.384  1.00 34.41           H  
ATOM    450  C   ALA A  31     -22.494  26.912  19.729  1.00 34.41           C  
ATOM    451  CB  ALA A  31     -20.357  27.360  18.439  1.00 34.41           C  
ATOM    452  HB1 ALA A  31     -19.299  27.606  18.528  1.00 34.41           H  
ATOM    453  HB2 ALA A  31     -20.866  28.173  17.920  1.00 34.41           H  
ATOM    454  HB3 ALA A  31     -20.470  26.444  17.859  1.00 34.41           H  
ATOM    455  O   ALA A  31     -22.897  25.746  19.648  1.00 34.41           O  
ATOM    456  N   PRO A  32     -23.336  27.968  19.709  1.00 33.43           N  
ATOM    457  CA  PRO A  32     -24.782  27.895  19.465  1.00 33.43           C  
ATOM    458  HA  PRO A  32     -25.178  26.929  19.777  1.00 33.43           H  
ATOM    459  C   PRO A  32     -25.165  28.126  17.980  1.00 33.43           C  
ATOM    460  CB  PRO A  32     -25.341  28.991  20.384  1.00 33.43           C  
ATOM    461  HB2 PRO A  32     -25.341  28.640  21.415  1.00 33.43           H  
ATOM    462  HB3 PRO A  32     -26.340  29.326  20.106  1.00 33.43           H  
ATOM    463  O   PRO A  32     -24.309  28.256  17.105  1.00 33.43           O  
ATOM    464  CG  PRO A  32     -24.306  30.104  20.224  1.00 33.43           C  
ATOM    465  HG2 PRO A  32     -24.307  30.782  21.077  1.00 33.43           H  
ATOM    466  HG3 PRO A  32     -24.487  30.651  19.299  1.00 33.43           H  
ATOM    467  CD  PRO A  32     -22.990  29.331  20.111  1.00 33.43           C  
ATOM    468  HD2 PRO A  32     -22.340  29.803  19.375  1.00 33.43           H  
ATOM    469  HD3 PRO A  32     -22.506  29.314  21.087  1.00 33.43           H  
ATOM    470  N   ASP A  33     -26.475  28.226  17.723  1.00 32.25           N  
ATOM    471  H   ASP A  33     -27.089  28.160  18.522  1.00 32.25           H  
ATOM    472  CA  ASP A  33     -27.099  28.806  16.520  1.00 32.25           C  
ATOM    473  HA  ASP A  33     -28.168  28.618  16.621  1.00 32.25           H  
ATOM    474  C   ASP A  33     -26.746  28.161  15.158  1.00 32.25           C  
ATOM    475  CB  ASP A  33     -26.949  30.341  16.576  1.00 32.25           C  
ATOM    476  HB2 ASP A  33     -27.465  30.797  15.731  1.00 32.25           H  
ATOM    477  HB3 ASP A  33     -25.895  30.613  16.524  1.00 32.25           H  
ATOM    478  O   ASP A  33     -26.606  26.944  15.045  1.00 32.25           O  
ATOM    479  CG  ASP A  33     -27.582  30.895  17.852  1.00 32.25           C  
ATOM    480  OD1 ASP A  33     -28.760  30.541  18.079  1.00 32.25           O  
ATOM    481  OD2 ASP A  33     -26.875  31.608  18.591  1.00 32.25           O  
ATOM    482  N   SER A  34     -26.718  28.957  14.076  1.00 38.46           N  
ATOM    483  H   SER A  34     -26.785  29.947  14.263  1.00 38.46           H  
ATOM    484  CA  SER A  34     -26.598  28.535  12.661  1.00 38.46           C  
ATOM    485  HA  SER A  34     -26.702  29.455  12.086  1.00 38.46           H  
ATOM    486  C   SER A  34     -27.732  27.634  12.111  1.00 38.46           C  
ATOM    487  CB  SER A  34     -25.177  28.040  12.344  1.00 38.46           C  
ATOM    488  HB2 SER A  34     -24.462  28.797  12.667  1.00 38.46           H  
ATOM    489  HB3 SER A  34     -25.072  27.908  11.267  1.00 38.46           H  
ATOM    490  O   SER A  34     -27.526  26.793  11.241  1.00 38.46           O  
ATOM    491  OG  SER A  34     -24.863  26.822  12.983  1.00 38.46           O  
ATOM    492  HG  SER A  34     -25.337  26.798  13.817  1.00 38.46           H  
ATOM    493  N   THR A  35     -28.965  27.842  12.586  1.00 36.12           N  
ATOM    494  H   THR A  35     -29.050  28.492  13.355  1.00 36.12           H  
ATOM    495  CA  THR A  35     -30.176  27.054  12.268  1.00 36.12           C  
ATOM    496  HA  THR A  35     -30.037  26.067  12.709  1.00 36.12           H  
ATOM    497  C   THR A  35     -30.503  26.874  10.768  1.00 36.12           C  
ATOM    498  CB  THR A  35     -31.382  27.712  12.965  1.00 36.12           C  
ATOM    499  HB  THR A  35     -31.538  28.709  12.554  1.00 36.12           H  
ATOM    500  O   THR A  35     -30.592  27.861  10.031  1.00 36.12           O  
ATOM    501  CG2 THR A  35     -32.684  26.914  12.857  1.00 36.12           C  
ATOM    502 HG21 THR A  35     -32.527  25.899  13.221  1.00 36.12           H  
ATOM    503 HG22 THR A  35     -33.455  27.393  13.461  1.00 36.12           H  
ATOM    504 HG23 THR A  35     -33.027  26.887  11.823  1.00 36.12           H  
ATOM    505  OG1 THR A  35     -31.094  27.822  14.337  1.00 36.12           O  
ATOM    506  HG1 THR A  35     -31.702  28.440  14.750  1.00 36.12           H  
ATOM    507  N   ARG A  36     -30.865  25.618  10.409  1.00 36.11           N  
ATOM    508  H   ARG A  36     -30.693  24.950  11.147  1.00 36.11           H  
ATOM    509  CA  ARG A  36     -31.191  24.984   9.090  1.00 36.11           C  
ATOM    510  HA  ARG A  36     -32.071  24.359   9.239  1.00 36.11           H  
ATOM    511  C   ARG A  36     -30.078  24.022   8.624  1.00 36.11           C  
ATOM    512  CB  ARG A  36     -31.542  25.994   7.978  1.00 36.11           C  
ATOM    513  HB2 ARG A  36     -30.722  26.703   7.863  1.00 36.11           H  
ATOM    514  HB3 ARG A  36     -31.622  25.473   7.024  1.00 36.11           H  
ATOM    515  O   ARG A  36     -28.957  24.096   9.094  1.00 36.11           O  
ATOM    516  CG  ARG A  36     -32.869  26.734   8.207  1.00 36.11           C  
ATOM    517  HG2 ARG A  36     -33.698  26.029   8.151  1.00 36.11           H  
ATOM    518  HG3 ARG A  36     -32.878  27.197   9.193  1.00 36.11           H  
ATOM    519  CD  ARG A  36     -33.039  27.811   7.126  1.00 36.11           C  
ATOM    520  HD2 ARG A  36     -33.276  27.324   6.180  1.00 36.11           H  
ATOM    521  HD3 ARG A  36     -32.093  28.337   6.993  1.00 36.11           H  
ATOM    522  NE  ARG A  36     -34.093  28.788   7.466  1.00 36.11           N  
ATOM    523  HE  ARG A  36     -34.972  28.695   6.978  1.00 36.11           H  
ATOM    524  NH1 ARG A  36     -32.864  30.034   8.965  1.00 36.11           N  
ATOM    525 HH11 ARG A  36     -32.764  30.845   9.558  1.00 36.11           H  
ATOM    526 HH12 ARG A  36     -32.120  29.351   8.943  1.00 36.11           H  
ATOM    527  NH2 ARG A  36     -34.922  30.691   8.402  1.00 36.11           N  
ATOM    528 HH21 ARG A  36     -35.780  30.584   7.881  1.00 36.11           H  
ATOM    529 HH22 ARG A  36     -34.812  31.482   9.020  1.00 36.11           H  
ATOM    530  CZ  ARG A  36     -33.952  29.828   8.272  1.00 36.11           C  
ATOM    531  N   ASP A  37     -30.316  23.033   7.759  1.00 37.27           N  
ATOM    532  H   ASP A  37     -29.466  22.601   7.424  1.00 37.27           H  
ATOM    533  CA  ASP A  37     -31.577  22.593   7.126  1.00 37.27           C  
ATOM    534  HA  ASP A  37     -32.290  23.414   7.053  1.00 37.27           H  
ATOM    535  C   ASP A  37     -32.265  21.420   7.856  1.00 37.27           C  
ATOM    536  CB  ASP A  37     -31.266  22.101   5.699  1.00 37.27           C  
ATOM    537  HB2 ASP A  37     -30.605  21.237   5.766  1.00 37.27           H  
ATOM    538  HB3 ASP A  37     -32.194  21.767   5.234  1.00 37.27           H  
ATOM    539  O   ASP A  37     -33.448  21.157   7.651  1.00 37.27           O  
ATOM    540  CG  ASP A  37     -30.634  23.147   4.781  1.00 37.27           C  
ATOM    541  OD1 ASP A  37     -31.136  24.291   4.779  1.00 37.27           O  
ATOM    542  OD2 ASP A  37     -29.669  22.768   4.076  1.00 37.27           O  
ATOM    543  N   GLY A  38     -31.516  20.670   8.674  1.00 42.97           N  
ATOM    544  H   GLY A  38     -30.592  21.029   8.869  1.00 42.97           H  
ATOM    545  CA  GLY A  38     -31.696  19.217   8.845  1.00 42.97           C  
ATOM    546  HA2 GLY A  38     -31.514  18.740   7.882  1.00 42.97           H  
ATOM    547  HA3 GLY A  38     -30.930  18.864   9.534  1.00 42.97           H  
ATOM    548  C   GLY A  38     -33.041  18.681   9.364  1.00 42.97           C  
ATOM    549  O   GLY A  38     -33.298  17.492   9.196  1.00 42.97           O  
ATOM    550  N   ALA A  39     -33.894  19.514   9.964  1.00 38.95           N  
ATOM    551  H   ALA A  39     -33.643  20.492  10.002  1.00 38.95           H  
ATOM    552  CA  ALA A  39     -35.198  19.110  10.505  1.00 38.95           C  
ATOM    553  HA  ALA A  39     -35.174  18.043  10.727  1.00 38.95           H  
ATOM    554  C   ALA A  39     -36.385  19.333   9.541  1.00 38.95           C  
ATOM    555  CB  ALA A  39     -35.405  19.848  11.834  1.00 38.95           C  
ATOM    556  HB1 ALA A  39     -35.499  20.920  11.658  1.00 38.95           H  
ATOM    557  HB2 ALA A  39     -34.565  19.661  12.502  1.00 38.95           H  
ATOM    558  HB3 ALA A  39     -36.318  19.490  12.310  1.00 38.95           H  
ATOM    559  O   ALA A  39     -37.477  18.808   9.775  1.00 38.95           O  
ATOM    560  N   LEU A  40     -36.197  20.088   8.449  1.00 38.21           N  
ATOM    561  H   LEU A  40     -35.265  20.429   8.262  1.00 38.21           H  
ATOM    562  CA  LEU A  40     -37.274  20.593   7.578  1.00 38.21           C  
ATOM    563  HA  LEU A  40     -38.117  20.813   8.233  1.00 38.21           H  
ATOM    564  C   LEU A  40     -37.804  19.540   6.572  1.00 38.21           C  
ATOM    565  CB  LEU A  40     -36.828  21.938   6.956  1.00 38.21           C  
ATOM    566  HB2 LEU A  40     -36.465  21.778   5.940  1.00 38.21           H  
ATOM    567  HB3 LEU A  40     -35.992  22.332   7.534  1.00 38.21           H  
ATOM    568  O   LEU A  40     -38.038  19.818   5.401  1.00 38.21           O  
ATOM    569  CG  LEU A  40     -37.920  23.026   6.959  1.00 38.21           C  
ATOM    570  HG  LEU A  40     -38.242  23.192   7.987  1.00 38.21           H  
ATOM    571  CD1 LEU A  40     -37.334  24.337   6.430  1.00 38.21           C  
ATOM    572 HD11 LEU A  40     -37.012  24.209   5.397  1.00 38.21           H  
ATOM    573 HD12 LEU A  40     -38.092  25.119   6.475  1.00 38.21           H  
ATOM    574 HD13 LEU A  40     -36.483  24.636   7.042  1.00 38.21           H  
ATOM    575  CD2 LEU A  40     -39.147  22.677   6.119  1.00 38.21           C  
ATOM    576 HD21 LEU A  40     -38.850  22.464   5.092  1.00 38.21           H  
ATOM    577 HD22 LEU A  40     -39.852  23.508   6.125  1.00 38.21           H  
ATOM    578 HD23 LEU A  40     -39.652  21.804   6.532  1.00 38.21           H  
ATOM    579  N   LEU A  41     -37.953  18.299   7.043  1.00 40.66           N  
ATOM    580  H   LEU A  41     -37.692  18.170   8.010  1.00 40.66           H  
ATOM    581  CA  LEU A  41     -38.537  17.148   6.338  1.00 40.66           C  
ATOM    582  HA  LEU A  41     -39.173  17.515   5.532  1.00 40.66           H  
ATOM    583  C   LEU A  41     -39.460  16.299   7.243  1.00 40.66           C  
ATOM    584  CB  LEU A  41     -37.400  16.286   5.741  1.00 40.66           C  
ATOM    585  HB2 LEU A  41     -36.714  16.027   6.547  1.00 40.66           H  
ATOM    586  HB3 LEU A  41     -37.826  15.357   5.363  1.00 40.66           H  
ATOM    587  O   LEU A  41     -39.910  15.236   6.820  1.00 40.66           O  
ATOM    588  CG  LEU A  41     -36.602  16.934   4.593  1.00 40.66           C  
ATOM    589  HG  LEU A  41     -36.164  17.875   4.925  1.00 40.66           H  
ATOM    590  CD1 LEU A  41     -35.456  16.004   4.180  1.00 40.66           C  
ATOM    591 HD11 LEU A  41     -34.818  15.823   5.044  1.00 40.66           H  
ATOM    592 HD12 LEU A  41     -34.867  16.487   3.400  1.00 40.66           H  
ATOM    593 HD13 LEU A  41     -35.861  15.057   3.822  1.00 40.66           H  
ATOM    594  CD2 LEU A  41     -37.455  17.177   3.345  1.00 40.66           C  
ATOM    595 HD21 LEU A  41     -37.933  16.252   3.022  1.00 40.66           H  
ATOM    596 HD22 LEU A  41     -38.227  17.914   3.569  1.00 40.66           H  
ATOM    597 HD23 LEU A  41     -36.838  17.584   2.544  1.00 40.66           H  
ATOM    598  N   ILE A  42     -39.705  16.736   8.487  1.00 42.53           N  
ATOM    599  H   ILE A  42     -39.273  17.606   8.765  1.00 42.53           H  
ATOM    600  CA  ILE A  42     -40.574  16.060   9.474  1.00 42.53           C  
ATOM    601  HA  ILE A  42     -41.144  15.278   8.972  1.00 42.53           H  
ATOM    602  C   ILE A  42     -41.617  17.026  10.064  1.00 42.53           C  
ATOM    603  CB  ILE A  42     -39.712  15.386  10.576  1.00 42.53           C  
ATOM    604  HB  ILE A  42     -39.076  16.150  11.025  1.00 42.53           H  
ATOM    605  O   ILE A  42     -42.727  16.603  10.376  1.00 42.53           O  
ATOM    606  CG1 ILE A  42     -38.802  14.295   9.957  1.00 42.53           C  
ATOM    607 HG12 ILE A  42     -39.423  13.529   9.493  1.00 42.53           H  
ATOM    608 HG13 ILE A  42     -38.186  14.743   9.177  1.00 42.53           H  
ATOM    609  CG2 ILE A  42     -40.582  14.778  11.695  1.00 42.53           C  
ATOM    610 HG21 ILE A  42     -41.172  15.551  12.188  1.00 42.53           H  
ATOM    611 HG22 ILE A  42     -41.258  14.031  11.281  1.00 42.53           H  
ATOM    612 HG23 ILE A  42     -39.963  14.322  12.468  1.00 42.53           H  
ATOM    613  CD1 ILE A  42     -37.834  13.622  10.939  1.00 42.53           C  
ATOM    614 HD11 ILE A  42     -38.377  12.983  11.636  1.00 42.53           H  
ATOM    615 HD12 ILE A  42     -37.277  14.380  11.489  1.00 42.53           H  
ATOM    616 HD13 ILE A  42     -37.133  13.001  10.381  1.00 42.53           H  
ATOM    617  N   ALA A  43     -41.290  18.317  10.194  1.00 38.82           N  
ATOM    618  H   ALA A  43     -40.367  18.626   9.926  1.00 38.82           H  
ATOM    619  CA  ALA A  43     -42.252  19.339  10.608  1.00 38.82           C  
ATOM    620  HA  ALA A  43     -42.674  19.040  11.568  1.00 38.82           H  
ATOM    621  C   ALA A  43     -43.413  19.476   9.602  1.00 38.82           C  
ATOM    622  CB  ALA A  43     -41.510  20.666  10.805  1.00 38.82           C  
ATOM    623  HB1 ALA A  43     -40.719  20.548  11.546  1.00 38.82           H  
ATOM    624  HB2 ALA A  43     -42.209  21.426  11.154  1.00 38.82           H  
ATOM    625  HB3 ALA A  43     -41.080  20.995   9.859  1.00 38.82           H  
ATOM    626  O   ALA A  43     -43.205  19.388   8.390  1.00 38.82           O  
ATOM    627  N   GLY A  44     -44.625  19.699  10.121  1.00 34.96           N  
ATOM    628  H   GLY A  44     -44.707  19.774  11.125  1.00 34.96           H  
ATOM    629  CA  GLY A  44     -45.826  19.965   9.327  1.00 34.96           C  
ATOM    630  HA2 GLY A  44     -45.857  19.289   8.472  1.00 34.96           H  
ATOM    631  HA3 GLY A  44     -46.705  19.775   9.942  1.00 34.96           H  
ATOM    632  C   GLY A  44     -45.906  21.405   8.804  1.00 34.96           C  
ATOM    633  O   GLY A  44     -44.935  22.159   8.851  1.00 34.96           O  
ATOM    634  N   SER A  45     -47.087  21.792   8.317  1.00 33.03           N  
ATOM    635  H   SER A  45     -47.873  21.161   8.383  1.00 33.03           H  
ATOM    636  CA  SER A  45     -47.379  23.146   7.839  1.00 33.03           C  
ATOM    637  HA  SER A  45     -46.546  23.806   8.083  1.00 33.03           H  
ATOM    638  C   SER A  45     -48.631  23.684   8.530  1.00 33.03           C  
ATOM    639  CB  SER A  45     -47.540  23.131   6.315  1.00 33.03           C  
ATOM    640  HB2 SER A  45     -48.424  22.552   6.047  1.00 33.03           H  
ATOM    641  HB3 SER A  45     -46.665  22.657   5.871  1.00 33.03           H  
ATOM    642  O   SER A  45     -49.690  23.068   8.452  1.00 33.03           O  
ATOM    643  OG  SER A  45     -47.662  24.438   5.791  1.00 33.03           O  
ATOM    644  HG  SER A  45     -46.958  24.992   6.135  1.00 33.03           H  
ATOM    645  N   GLU A  46     -48.490  24.828   9.198  1.00 36.63           N  
ATOM    646  H   GLU A  46     -47.589  25.286   9.190  1.00 36.63           H  
ATOM    647  CA  GLU A  46     -49.557  25.579   9.868  1.00 36.63           C  
ATOM    648  HA  GLU A  46     -50.527  25.267   9.479  1.00 36.63           H  
ATOM    649  C   GLU A  46     -49.390  27.083   9.582  1.00 36.63           C  
ATOM    650  CB  GLU A  46     -49.540  25.328  11.387  1.00 36.63           C  
ATOM    651  HB2 GLU A  46     -48.562  25.601  11.783  1.00 36.63           H  
ATOM    652  HB3 GLU A  46     -50.287  25.976  11.846  1.00 36.63           H  
ATOM    653  O   GLU A  46     -48.336  27.514   9.105  1.00 36.63           O  
ATOM    654  CG  GLU A  46     -49.867  23.879  11.777  1.00 36.63           C  
ATOM    655  HG2 GLU A  46     -49.038  23.232  11.490  1.00 36.63           H  
ATOM    656  HG3 GLU A  46     -50.752  23.565  11.224  1.00 36.63           H  
ATOM    657  CD  GLU A  46     -50.129  23.741  13.284  1.00 36.63           C  
ATOM    658  OE1 GLU A  46     -51.047  22.968  13.638  1.00 36.63           O  
ATOM    659  OE2 GLU A  46     -49.414  24.408  14.067  1.00 36.63           O  
ATOM    660  N   ALA A  47     -50.420  27.887   9.868  1.00 42.18           N  
ATOM    661  H   ALA A  47     -51.229  27.492  10.326  1.00 42.18           H  
ATOM    662  CA  ALA A  47     -50.444  29.329   9.605  1.00 42.18           C  
ATOM    663  HA  ALA A  47     -49.417  29.664   9.455  1.00 42.18           H  
ATOM    664  C   ALA A  47     -51.040  30.127  10.791  1.00 42.18           C  
ATOM    665  CB  ALA A  47     -51.212  29.568   8.299  1.00 42.18           C  
ATOM    666  HB1 ALA A  47     -52.240  29.221   8.405  1.00 42.18           H  
ATOM    667  HB2 ALA A  47     -50.732  29.024   7.485  1.00 42.18           H  
ATOM    668  HB3 ALA A  47     -51.220  30.631   8.056  1.00 42.18           H  
ATOM    669  O   ALA A  47     -51.884  29.605  11.526  1.00 42.18           O  
ATOM    670  N   PRO A  48     -50.624  31.390  11.014  1.00 40.23           N  
ATOM    671  CA  PRO A  48     -50.937  32.118  12.245  1.00 40.23           C  
ATOM    672  HA  PRO A  48     -50.814  31.446  13.094  1.00 40.23           H  
ATOM    673  C   PRO A  48     -52.368  32.690  12.304  1.00 40.23           C  
ATOM    674  CB  PRO A  48     -49.853  33.198  12.354  1.00 40.23           C  
ATOM    675  HB2 PRO A  48     -48.979  32.786  12.857  1.00 40.23           H  
ATOM    676  HB3 PRO A  48     -50.198  34.089  12.878  1.00 40.23           H  
ATOM    677  O   PRO A  48     -52.638  33.793  11.842  1.00 40.23           O  
ATOM    678  CG  PRO A  48     -49.502  33.493  10.897  1.00 40.23           C  
ATOM    679  HG2 PRO A  48     -50.239  34.174  10.471  1.00 40.23           H  
ATOM    680  HG3 PRO A  48     -48.497  33.901  10.795  1.00 40.23           H  
ATOM    681  CD  PRO A  48     -49.628  32.120  10.239  1.00 40.23           C  
ATOM    682  HD2 PRO A  48     -48.669  31.605  10.298  1.00 40.23           H  
ATOM    683  HD3 PRO A  48     -49.935  32.231   9.199  1.00 40.23           H  
ATOM    684  N   LYS A  49     -53.254  31.951  12.984  1.00 34.88           N  
ATOM    685  H   LYS A  49     -52.986  30.984  13.103  1.00 34.88           H  
ATOM    686  CA  LYS A  49     -54.364  32.440  13.835  1.00 34.88           C  
ATOM    687  HA  LYS A  49     -55.099  31.638  13.908  1.00 34.88           H  
ATOM    688  C   LYS A  49     -55.155  33.683  13.355  1.00 34.88           C  
ATOM    689  CB  LYS A  49     -53.825  32.701  15.260  1.00 34.88           C  
ATOM    690  HB2 LYS A  49     -53.074  33.489  15.212  1.00 34.88           H  
ATOM    691  HB3 LYS A  49     -54.651  33.067  15.870  1.00 34.88           H  
ATOM    692  O   LYS A  49     -54.972  34.778  13.885  1.00 34.88           O  
ATOM    693  CG  LYS A  49     -53.216  31.486  15.978  1.00 34.88           C  
ATOM    694  HG2 LYS A  49     -53.947  30.679  16.007  1.00 34.88           H  
ATOM    695  HG3 LYS A  49     -52.328  31.147  15.443  1.00 34.88           H  
ATOM    696  CD  LYS A  49     -52.828  31.878  17.414  1.00 34.88           C  
ATOM    697  HD2 LYS A  49     -53.720  32.217  17.940  1.00 34.88           H  
ATOM    698  HD3 LYS A  49     -52.108  32.695  17.380  1.00 34.88           H  
ATOM    699  CE  LYS A  49     -52.217  30.689  18.167  1.00 34.88           C  
ATOM    700  HE2 LYS A  49     -51.313  30.373  17.647  1.00 34.88           H  
ATOM    701  HE3 LYS A  49     -52.922  29.858  18.135  1.00 34.88           H  
ATOM    702  NZ  LYS A  49     -51.904  31.033  19.580  1.00 34.88           N  
ATOM    703  HZ1 LYS A  49     -51.501  30.238  20.055  1.00 34.88           H  
ATOM    704  HZ2 LYS A  49     -52.742  31.300  20.076  1.00 34.88           H  
ATOM    705  HZ3 LYS A  49     -51.246  31.797  19.628  1.00 34.88           H  
ATOM    706  N   ARG A  50     -56.167  33.484  12.502  1.00 37.76           N  
ATOM    707  H   ARG A  50     -56.200  32.599  12.018  1.00 37.76           H  
ATOM    708  CA  ARG A  50     -57.401  34.307  12.447  1.00 37.76           C  
ATOM    709  HA  ARG A  50     -57.690  34.556  13.468  1.00 37.76           H  
ATOM    710  C   ARG A  50     -58.551  33.480  11.855  1.00 37.76           C  
ATOM    711  CB  ARG A  50     -57.175  35.619  11.655  1.00 37.76           C  
ATOM    712  HB2 ARG A  50     -56.224  35.573  11.124  1.00 37.76           H  
ATOM    713  HB3 ARG A  50     -57.963  35.741  10.912  1.00 37.76           H  
ATOM    714  O   ARG A  50     -58.303  32.619  11.018  1.00 37.76           O  
ATOM    715  CG  ARG A  50     -57.185  36.853  12.579  1.00 37.76           C  
ATOM    716  HG2 ARG A  50     -56.421  36.741  13.347  1.00 37.76           H  
ATOM    717  HG3 ARG A  50     -58.157  36.923  13.066  1.00 37.76           H  
ATOM    718  CD  ARG A  50     -56.916  38.159  11.816  1.00 37.76           C  
ATOM    719  HD2 ARG A  50     -57.706  38.299  11.078  1.00 37.76           H  
ATOM    720  HD3 ARG A  50     -55.961  38.072  11.298  1.00 37.76           H  
ATOM    721  NE  ARG A  50     -56.869  39.317  12.735  1.00 37.76           N  
ATOM    722  HE  ARG A  50     -56.795  39.104  13.719  1.00 37.76           H  
ATOM    723  NH1 ARG A  50     -56.960  41.001  11.169  1.00 37.76           N  
ATOM    724 HH11 ARG A  50     -57.011  40.312  10.432  1.00 37.76           H  
ATOM    725 HH12 ARG A  50     -56.983  41.986  10.946  1.00 37.76           H  
ATOM    726  NH2 ARG A  50     -56.844  41.518  13.332  1.00 37.76           N  
ATOM    727 HH21 ARG A  50     -56.817  41.264  14.309  1.00 37.76           H  
ATOM    728 HH22 ARG A  50     -56.872  42.496  13.081  1.00 37.76           H  
ATOM    729  CZ  ARG A  50     -56.890  40.600  12.408  1.00 37.76           C  
ATOM    730  N   GLY A  51     -59.785  33.721  12.297  1.00 36.55           N  
ATOM    731  H   GLY A  51     -59.921  34.391  13.041  1.00 36.55           H  
ATOM    732  CA  GLY A  51     -60.977  32.977  11.868  1.00 36.55           C  
ATOM    733  HA2 GLY A  51     -61.362  33.415  10.947  1.00 36.55           H  
ATOM    734  HA3 GLY A  51     -60.718  31.937  11.671  1.00 36.55           H  
ATOM    735  C   GLY A  51     -62.089  33.001  12.921  1.00 36.55           C  
ATOM    736  O   GLY A  51     -61.858  33.463  14.039  1.00 36.55           O  
ATOM    737  N   SER A  52     -63.277  32.506  12.560  1.00 36.18           N  
ATOM    738  H   SER A  52     -63.380  32.097  11.642  1.00 36.18           H  
ATOM    739  CA  SER A  52     -64.493  32.626  13.374  1.00 36.18           C  
ATOM    740  HA  SER A  52     -64.260  33.231  14.250  1.00 36.18           H  
ATOM    741  C   SER A  52     -65.055  31.297  13.884  1.00 36.18           C  
ATOM    742  CB  SER A  52     -65.597  33.375  12.617  1.00 36.18           C  
ATOM    743  HB2 SER A  52     -66.503  33.402  13.223  1.00 36.18           H  
ATOM    744  HB3 SER A  52     -65.816  32.861  11.681  1.00 36.18           H  
ATOM    745  O   SER A  52     -64.918  30.242  13.269  1.00 36.18           O  
ATOM    746  OG  SER A  52     -65.184  34.702  12.356  1.00 36.18           O  
ATOM    747  HG  SER A  52     -65.924  35.187  11.983  1.00 36.18           H  
ATOM    748  N   ILE A  53     -65.733  31.443  15.020  1.00 41.43           N  
ATOM    749  H   ILE A  53     -65.653  32.366  15.422  1.00 41.43           H  
ATOM    750  CA  ILE A  53     -66.787  30.628  15.639  1.00 41.43           C  
ATOM    751  HA  ILE A  53     -66.341  30.028  16.432  1.00 41.43           H  
ATOM    752  C   ILE A  53     -67.553  29.678  14.683  1.00 41.43           C  
ATOM    753  CB  ILE A  53     -67.760  31.658  16.286  1.00 41.43           C  
ATOM    754  HB  ILE A  53     -68.057  32.358  15.505  1.00 41.43           H  
ATOM    755  O   ILE A  53     -67.966  30.070  13.598  1.00 41.43           O  
ATOM    756  CG1 ILE A  53     -67.067  32.469  17.415  1.00 41.43           C  
ATOM    757 HG12 ILE A  53     -67.012  31.860  18.318  1.00 41.43           H  
ATOM    758 HG13 ILE A  53     -66.045  32.728  17.140  1.00 41.43           H  
ATOM    759  CG2 ILE A  53     -69.050  31.029  16.834  1.00 41.43           C  
ATOM    760 HG21 ILE A  53     -69.659  30.662  16.008  1.00 41.43           H  
ATOM    761 HG22 ILE A  53     -69.654  31.772  17.353  1.00 41.43           H  
ATOM    762 HG23 ILE A  53     -68.819  30.219  17.526  1.00 41.43           H  
ATOM    763  CD1 ILE A  53     -67.772  33.794  17.743  1.00 41.43           C  
ATOM    764 HD11 ILE A  53     -68.754  33.614  18.180  1.00 41.43           H  
ATOM    765 HD12 ILE A  53     -67.173  34.350  18.464  1.00 41.43           H  
ATOM    766 HD13 ILE A  53     -67.880  34.393  16.839  1.00 41.43           H  
ATOM    767  N   LEU A  54     -67.834  28.467  15.189  1.00 37.95           N  
ATOM    768  H   LEU A  54     -67.404  28.269  16.081  1.00 37.95           H  
ATOM    769  CA  LEU A  54     -68.888  27.520  14.775  1.00 37.95           C  
ATOM    770  HA  LEU A  54     -68.681  26.605  15.331  1.00 37.95           H  
ATOM    771  C   LEU A  54     -68.951  27.098  13.288  1.00 37.95           C  
ATOM    772  CB  LEU A  54     -70.246  28.040  15.298  1.00 37.95           C  
ATOM    773  HB2 LEU A  54     -70.138  28.308  16.349  1.00 37.95           H  
ATOM    774  HB3 LEU A  54     -70.496  28.943  14.742  1.00 37.95           H  
ATOM    775  O   LEU A  54     -69.697  27.643  12.482  1.00 37.95           O  
ATOM    776  CG  LEU A  54     -71.437  27.069  15.178  1.00 37.95           C  
ATOM    777  HG  LEU A  54     -71.593  26.795  14.134  1.00 37.95           H  
ATOM    778  CD1 LEU A  54     -71.230  25.790  15.994  1.00 37.95           C  
ATOM    779 HD11 LEU A  54     -71.027  26.043  17.035  1.00 37.95           H  
ATOM    780 HD12 LEU A  54     -70.402  25.211  15.585  1.00 37.95           H  
ATOM    781 HD13 LEU A  54     -72.133  25.182  15.947  1.00 37.95           H  
ATOM    782  CD2 LEU A  54     -72.702  27.758  15.688  1.00 37.95           C  
ATOM    783 HD21 LEU A  54     -72.592  28.030  16.738  1.00 37.95           H  
ATOM    784 HD22 LEU A  54     -72.889  28.659  15.104  1.00 37.95           H  
ATOM    785 HD23 LEU A  54     -73.560  27.094  15.576  1.00 37.95           H  
ATOM    786  N   SER A  55     -68.310  25.970  12.969  1.00 41.37           N  
ATOM    787  H   SER A  55     -67.688  25.559  13.651  1.00 41.37           H  
ATOM    788  CA  SER A  55     -68.733  25.090  11.866  1.00 41.37           C  
ATOM    789  HA  SER A  55     -69.813  25.186  11.751  1.00 41.37           H  
ATOM    790  C   SER A  55     -68.435  23.619  12.200  1.00 41.37           C  
ATOM    791  CB  SER A  55     -68.098  25.512  10.535  1.00 41.37           C  
ATOM    792  HB2 SER A  55     -68.550  24.937   9.727  1.00 41.37           H  
ATOM    793  HB3 SER A  55     -68.292  26.569  10.353  1.00 41.37           H  
ATOM    794  O   SER A  55     -67.646  23.335  13.102  1.00 41.37           O  
ATOM    795  OG  SER A  55     -66.707  25.275  10.538  1.00 41.37           O  
ATOM    796  HG  SER A  55     -66.297  25.977  11.047  1.00 41.37           H  
ATOM    797  N   LYS A  56     -69.094  22.666  11.520  1.00 37.75           N  
ATOM    798  H   LYS A  56     -69.752  22.959  10.812  1.00 37.75           H  
ATOM    799  CA  LYS A  56     -68.960  21.220  11.804  1.00 37.75           C  
ATOM    800  HA  LYS A  56     -67.969  21.045  12.224  1.00 37.75           H  
ATOM    801  C   LYS A  56     -69.056  20.359  10.524  1.00 37.75           C  
ATOM    802  CB  LYS A  56     -69.994  20.858  12.894  1.00 37.75           C  
ATOM    803  HB2 LYS A  56     -70.997  20.858  12.469  1.00 37.75           H  
ATOM    804  HB3 LYS A  56     -69.962  21.634  13.659  1.00 37.75           H  
ATOM    805  O   LYS A  56     -70.092  19.736  10.290  1.00 37.75           O  
ATOM    806  CG  LYS A  56     -69.724  19.513  13.590  1.00 37.75           C  
ATOM    807  HG2 LYS A  56     -68.690  19.489  13.933  1.00 37.75           H  
ATOM    808  HG3 LYS A  56     -69.886  18.694  12.888  1.00 37.75           H  
ATOM    809  CD  LYS A  56     -70.657  19.351  14.803  1.00 37.75           C  
ATOM    810  HD2 LYS A  56     -71.691  19.345  14.458  1.00 37.75           H  
ATOM    811  HD3 LYS A  56     -70.516  20.203  15.467  1.00 37.75           H  
ATOM    812  CE  LYS A  56     -70.364  18.059  15.578  1.00 37.75           C  
ATOM    813  HE2 LYS A  56     -69.305  18.043  15.835  1.00 37.75           H  
ATOM    814  HE3 LYS A  56     -70.564  17.209  14.926  1.00 37.75           H  
ATOM    815  NZ  LYS A  56     -71.186  17.966  16.815  1.00 37.75           N  
ATOM    816  HZ1 LYS A  56     -70.991  18.741  17.432  1.00 37.75           H  
ATOM    817  HZ2 LYS A  56     -70.988  17.113  17.319  1.00 37.75           H  
ATOM    818  HZ3 LYS A  56     -72.172  17.984  16.597  1.00 37.75           H  
ATOM    819  N   PRO A  57     -68.021  20.349   9.657  1.00 41.15           N  
ATOM    820  CA  PRO A  57     -68.073  19.686   8.347  1.00 41.15           C  
ATOM    821  HA  PRO A  57     -68.889  20.135   7.780  1.00 41.15           H  
ATOM    822  C   PRO A  57     -68.293  18.165   8.416  1.00 41.15           C  
ATOM    823  CB  PRO A  57     -66.749  20.028   7.651  1.00 41.15           C  
ATOM    824  HB2 PRO A  57     -66.880  20.165   6.578  1.00 41.15           H  
ATOM    825  HB3 PRO A  57     -66.010  19.251   7.848  1.00 41.15           H  
ATOM    826  O   PRO A  57     -67.761  17.487   9.294  1.00 41.15           O  
ATOM    827  CG  PRO A  57     -66.306  21.320   8.335  1.00 41.15           C  
ATOM    828  HG2 PRO A  57     -66.830  22.170   7.896  1.00 41.15           H  
ATOM    829  HG3 PRO A  57     -65.227  21.462   8.282  1.00 41.15           H  
ATOM    830  CD  PRO A  57     -66.781  21.109   9.770  1.00 41.15           C  
ATOM    831  HD2 PRO A  57     -66.918  22.077  10.252  1.00 41.15           H  
ATOM    832  HD3 PRO A  57     -66.046  20.520  10.320  1.00 41.15           H  
ATOM    833  N   ARG A  58     -69.033  17.611   7.444  1.00 37.00           N  
ATOM    834  H   ARG A  58     -69.412  18.223   6.736  1.00 37.00           H  
ATOM    835  CA  ARG A  58     -69.401  16.184   7.373  1.00 37.00           C  
ATOM    836  HA  ARG A  58     -68.983  15.670   8.238  1.00 37.00           H  
ATOM    837  C   ARG A  58     -68.836  15.518   6.111  1.00 37.00           C  
ATOM    838  CB  ARG A  58     -70.939  16.078   7.471  1.00 37.00           C  
ATOM    839  HB2 ARG A  58     -71.259  16.578   8.385  1.00 37.00           H  
ATOM    840  HB3 ARG A  58     -71.385  16.606   6.628  1.00 37.00           H  
ATOM    841  O   ARG A  58     -69.291  15.801   5.012  1.00 37.00           O  
ATOM    842  CG  ARG A  58     -71.479  14.636   7.492  1.00 37.00           C  
ATOM    843  HG2 ARG A  58     -71.028  14.093   8.323  1.00 37.00           H  
ATOM    844  HG3 ARG A  58     -71.221  14.138   6.558  1.00 37.00           H  
ATOM    845  CD  ARG A  58     -73.010  14.633   7.655  1.00 37.00           C  
ATOM    846  HD2 ARG A  58     -73.446  15.215   6.843  1.00 37.00           H  
ATOM    847  HD3 ARG A  58     -73.259  15.116   8.600  1.00 37.00           H  
ATOM    848  NE  ARG A  58     -73.576  13.266   7.632  1.00 37.00           N  
ATOM    849  HE  ARG A  58     -72.941  12.512   7.411  1.00 37.00           H  
ATOM    850  NH1 ARG A  58     -75.764  13.822   8.094  1.00 37.00           N  
ATOM    851 HH11 ARG A  58     -75.515  14.800   8.126  1.00 37.00           H  
ATOM    852 HH12 ARG A  58     -76.728  13.548   8.222  1.00 37.00           H  
ATOM    853  NH2 ARG A  58     -75.224  11.690   7.758  1.00 37.00           N  
ATOM    854 HH21 ARG A  58     -74.564  10.957   7.538  1.00 37.00           H  
ATOM    855 HH22 ARG A  58     -76.195  11.451   7.903  1.00 37.00           H  
ATOM    856  CZ  ARG A  58     -74.845  12.935   7.828  1.00 37.00           C  
ATOM    857  N   ALA A  59     -67.893  14.589   6.297  1.00 36.92           N  
ATOM    858  H   ALA A  59     -67.546  14.484   7.239  1.00 36.92           H  
ATOM    859  CA  ALA A  59     -67.488  13.561   5.322  1.00 36.92           C  
ATOM    860  HA  ALA A  59     -66.576  13.115   5.720  1.00 36.92           H  
ATOM    861  C   ALA A  59     -67.092  14.031   3.894  1.00 36.92           C  
ATOM    862  CB  ALA A  59     -68.545  12.445   5.336  1.00 36.92           C  
ATOM    863  HB1 ALA A  59     -69.477  12.814   4.907  1.00 36.92           H  
ATOM    864  HB2 ALA A  59     -68.197  11.603   4.739  1.00 36.92           H  
ATOM    865  HB3 ALA A  59     -68.721  12.102   6.356  1.00 36.92           H  
ATOM    866  O   ALA A  59     -67.525  13.448   2.901  1.00 36.92           O  
ATOM    867  N   GLY A  60     -66.221  15.040   3.770  1.00 36.14           N  
ATOM    868  H   GLY A  60     -65.884  15.498   4.605  1.00 36.14           H  
ATOM    869  CA  GLY A  60     -65.650  15.441   2.473  1.00 36.14           C  
ATOM    870  HA2 GLY A  60     -65.063  16.351   2.599  1.00 36.14           H  
ATOM    871  HA3 GLY A  60     -66.464  15.660   1.782  1.00 36.14           H  
ATOM    872  C   GLY A  60     -64.738  14.364   1.853  1.00 36.14           C  
ATOM    873  O   GLY A  60     -63.763  13.938   2.472  1.00 36.14           O  
ATOM    874  N   GLY A  61     -65.037  13.932   0.623  1.00 32.79           N  
ATOM    875  H   GLY A  61     -65.862  14.318   0.187  1.00 32.79           H  
ATOM    876  CA  GLY A  61     -64.401  12.788  -0.054  1.00 32.79           C  
ATOM    877  HA2 GLY A  61     -64.321  11.965   0.657  1.00 32.79           H  
ATOM    878  HA3 GLY A  61     -65.049  12.460  -0.866  1.00 32.79           H  
ATOM    879  C   GLY A  61     -63.002  13.038  -0.640  1.00 32.79           C  
ATOM    880  O   GLY A  61     -62.810  12.918  -1.848  1.00 32.79           O  
ATOM    881  N   ALA A  62     -62.010  13.372   0.188  1.00 39.79           N  
ATOM    882  H   ALA A  62     -62.232  13.478   1.168  1.00 39.79           H  
ATOM    883  CA  ALA A  62     -60.641  13.642  -0.263  1.00 39.79           C  
ATOM    884  HA  ALA A  62     -60.698  14.344  -1.095  1.00 39.79           H  
ATOM    885  C   ALA A  62     -59.907  12.374  -0.768  1.00 39.79           C  
ATOM    886  CB  ALA A  62     -59.884  14.345   0.870  1.00 39.79           C  
ATOM    887  HB1 ALA A  62     -58.876  14.597   0.538  1.00 39.79           H  
ATOM    888  HB2 ALA A  62     -60.403  15.261   1.151  1.00 39.79           H  
ATOM    889  HB3 ALA A  62     -59.819  13.689   1.738  1.00 39.79           H  
ATOM    890  O   ALA A  62     -59.501  11.507   0.008  1.00 39.79           O  
ATOM    891  N   GLY A  63     -59.694  12.274  -2.085  1.00 38.51           N  
ATOM    892  H   GLY A  63     -60.105  12.982  -2.677  1.00 38.51           H  
ATOM    893  CA  GLY A  63     -59.045  11.127  -2.734  1.00 38.51           C  
ATOM    894  HA2 GLY A  63     -59.526  10.210  -2.395  1.00 38.51           H  
ATOM    895  HA3 GLY A  63     -59.192  11.205  -3.811  1.00 38.51           H  
ATOM    896  C   GLY A  63     -57.537  11.027  -2.467  1.00 38.51           C  
ATOM    897  O   GLY A  63     -56.733  11.581  -3.213  1.00 38.51           O  
ATOM    898  N   ALA A  64     -57.138  10.282  -1.431  1.00 47.34           N  
ATOM    899  H   ALA A  64     -57.857   9.961  -0.798  1.00 47.34           H  
ATOM    900  CA  ALA A  64     -55.738  10.125  -1.025  1.00 47.34           C  
ATOM    901  HA  ALA A  64     -55.364  11.113  -0.756  1.00 47.34           H  
ATOM    902  C   ALA A  64     -54.828   9.562  -2.146  1.00 47.34           C  
ATOM    903  CB  ALA A  64     -55.693   9.260   0.242  1.00 47.34           C  
ATOM    904  HB1 ALA A  64     -56.089   8.267   0.031  1.00 47.34           H  
ATOM    905  HB2 ALA A  64     -54.664   9.170   0.590  1.00 47.34           H  
ATOM    906  HB3 ALA A  64     -56.290   9.725   1.027  1.00 47.34           H  
ATOM    907  O   ALA A  64     -54.910   8.389  -2.527  1.00 47.34           O  
ATOM    908  N   GLY A  65     -53.923  10.408  -2.653  1.00 45.30           N  
ATOM    909  H   GLY A  65     -53.958  11.364  -2.328  1.00 45.30           H  
ATOM    910  CA  GLY A  65     -53.044  10.120  -3.789  1.00 45.30           C  
ATOM    911  HA2 GLY A  65     -53.653   9.813  -4.640  1.00 45.30           H  
ATOM    912  HA3 GLY A  65     -52.520  11.034  -4.069  1.00 45.30           H  
ATOM    913  C   GLY A  65     -51.993   9.041  -3.507  1.00 45.30           C  
ATOM    914  O   GLY A  65     -50.909   9.325  -2.999  1.00 45.30           O  
ATOM    915  N   LYS A  66     -52.295   7.794  -3.886  1.00 46.68           N  
ATOM    916  H   LYS A  66     -53.237   7.648  -4.220  1.00 46.68           H  
ATOM    917  CA  LYS A  66     -51.390   6.635  -3.765  1.00 46.68           C  
ATOM    918  HA  LYS A  66     -51.178   6.496  -2.705  1.00 46.68           H  
ATOM    919  C   LYS A  66     -50.065   6.923  -4.508  1.00 46.68           C  
ATOM    920  CB  LYS A  66     -52.102   5.376  -4.301  1.00 46.68           C  
ATOM    921  HB2 LYS A  66     -52.446   5.571  -5.316  1.00 46.68           H  
ATOM    922  HB3 LYS A  66     -51.396   4.546  -4.331  1.00 46.68           H  
ATOM    923  O   LYS A  66     -50.109   7.204  -5.707  1.00 46.68           O  
ATOM    924  CG  LYS A  66     -53.299   4.981  -3.413  1.00 46.68           C  
ATOM    925  HG2 LYS A  66     -52.923   4.575  -2.474  1.00 46.68           H  
ATOM    926  HG3 LYS A  66     -53.889   5.869  -3.183  1.00 46.68           H  
ATOM    927  CD  LYS A  66     -54.241   3.960  -4.070  1.00 46.68           C  
ATOM    928  HD2 LYS A  66     -54.589   4.364  -5.020  1.00 46.68           H  
ATOM    929  HD3 LYS A  66     -53.712   3.023  -4.243  1.00 46.68           H  
ATOM    930  CE  LYS A  66     -55.444   3.730  -3.138  1.00 46.68           C  
ATOM    931  HE2 LYS A  66     -55.097   3.229  -2.234  1.00 46.68           H  
ATOM    932  HE3 LYS A  66     -55.831   4.704  -2.838  1.00 46.68           H  
ATOM    933  NZ  LYS A  66     -56.534   2.946  -3.777  1.00 46.68           N  
ATOM    934  HZ1 LYS A  66     -56.217   2.027  -4.054  1.00 46.68           H  
ATOM    935  HZ2 LYS A  66     -57.302   2.831  -3.132  1.00 46.68           H  
ATOM    936  HZ3 LYS A  66     -56.895   3.431  -4.585  1.00 46.68           H  
ATOM    937  N   PRO A  67     -48.892   6.872  -3.841  1.00 51.56           N  
ATOM    938  CA  PRO A  67     -47.663   7.473  -4.361  1.00 51.56           C  
ATOM    939  HA  PRO A  67     -47.866   8.533  -4.511  1.00 51.56           H  
ATOM    940  C   PRO A  67     -47.210   6.846  -5.696  1.00 51.56           C  
ATOM    941  CB  PRO A  67     -46.616   7.342  -3.247  1.00 51.56           C  
ATOM    942  HB2 PRO A  67     -46.583   8.269  -2.674  1.00 51.56           H  
ATOM    943  HB3 PRO A  67     -45.626   7.102  -3.635  1.00 51.56           H  
ATOM    944  O   PRO A  67     -47.218   5.620  -5.840  1.00 51.56           O  
ATOM    945  CG  PRO A  67     -47.160   6.221  -2.362  1.00 51.56           C  
ATOM    946  HG2 PRO A  67     -46.826   6.318  -1.329  1.00 51.56           H  
ATOM    947  HG3 PRO A  67     -46.868   5.254  -2.773  1.00 51.56           H  
ATOM    948  CD  PRO A  67     -48.672   6.393  -2.486  1.00 51.56           C  
ATOM    949  HD2 PRO A  67     -49.020   7.142  -1.775  1.00 51.56           H  
ATOM    950  HD3 PRO A  67     -49.175   5.441  -2.311  1.00 51.56           H  
ATOM    951  N   PRO A  68     -46.802   7.659  -6.691  1.00 52.38           N  
ATOM    952  CA  PRO A  68     -46.702   7.215  -8.079  1.00 52.38           C  
ATOM    953  HA  PRO A  68     -47.659   6.782  -8.372  1.00 52.38           H  
ATOM    954  C   PRO A  68     -45.604   6.165  -8.292  1.00 52.38           C  
ATOM    955  CB  PRO A  68     -46.478   8.487  -8.909  1.00 52.38           C  
ATOM    956  HB2 PRO A  68     -45.811   8.320  -9.755  1.00 52.38           H  
ATOM    957  HB3 PRO A  68     -47.440   8.864  -9.257  1.00 52.38           H  
ATOM    958  O   PRO A  68     -44.420   6.425  -8.063  1.00 52.38           O  
ATOM    959  CG  PRO A  68     -45.882   9.476  -7.908  1.00 52.38           C  
ATOM    960  HG2 PRO A  68     -46.078  10.510  -8.189  1.00 52.38           H  
ATOM    961  HG3 PRO A  68     -44.811   9.296  -7.808  1.00 52.38           H  
ATOM    962  CD  PRO A  68     -46.587   9.096  -6.609  1.00 52.38           C  
ATOM    963  HD2 PRO A  68     -47.550   9.604  -6.553  1.00 52.38           H  
ATOM    964  HD3 PRO A  68     -45.970   9.361  -5.751  1.00 52.38           H  
ATOM    965  N   LYS A  69     -45.996   4.994  -8.822  1.00 59.45           N  
ATOM    966  H   LYS A  69     -46.993   4.875  -8.926  1.00 59.45           H  
ATOM    967  CA  LYS A  69     -45.140   3.807  -9.051  1.00 59.45           C  
ATOM    968  HA  LYS A  69     -44.895   3.363  -8.086  1.00 59.45           H  
ATOM    969  C   LYS A  69     -43.798   4.129  -9.732  1.00 59.45           C  
ATOM    970  CB  LYS A  69     -45.909   2.766  -9.895  1.00 59.45           C  
ATOM    971  HB2 LYS A  69     -45.223   1.957 -10.147  1.00 59.45           H  
ATOM    972  HB3 LYS A  69     -46.226   3.233 -10.828  1.00 59.45           H  
ATOM    973  O   LYS A  69     -42.767   3.570  -9.351  1.00 59.45           O  
ATOM    974  CG  LYS A  69     -47.139   2.146  -9.201  1.00 59.45           C  
ATOM    975  HG2 LYS A  69     -46.815   1.631  -8.296  1.00 59.45           H  
ATOM    976  HG3 LYS A  69     -47.841   2.933  -8.925  1.00 59.45           H  
ATOM    977  CD  LYS A  69     -47.848   1.144 -10.134  1.00 59.45           C  
ATOM    978  HD2 LYS A  69     -47.138   0.373 -10.433  1.00 59.45           H  
ATOM    979  HD3 LYS A  69     -48.182   1.673 -11.027  1.00 59.45           H  
ATOM    980  CE  LYS A  69     -49.060   0.478  -9.459  1.00 59.45           C  
ATOM    981  HE2 LYS A  69     -49.741   1.258  -9.119  1.00 59.45           H  
ATOM    982  HE3 LYS A  69     -48.713  -0.066  -8.581  1.00 59.45           H  
ATOM    983  NZ  LYS A  69     -49.775  -0.450 -10.380  1.00 59.45           N  
ATOM    984  HZ1 LYS A  69     -49.164  -1.183 -10.711  1.00 59.45           H  
ATOM    985  HZ2 LYS A  69     -50.558  -0.889  -9.917  1.00 59.45           H  
ATOM    986  HZ3 LYS A  69     -50.136   0.041 -11.186  1.00 59.45           H  
ATOM    987  N   ARG A  70     -43.789   5.075 -10.685  1.00 62.69           N  
ATOM    988  H   ARG A  70     -44.679   5.490 -10.919  1.00 62.69           H  
ATOM    989  CA  ARG A  70     -42.582   5.559 -11.387  1.00 62.69           C  
ATOM    990  HA  ARG A  70     -42.168   4.735 -11.969  1.00 62.69           H  
ATOM    991  C   ARG A  70     -41.478   5.994 -10.415  1.00 62.69           C  
ATOM    992  CB  ARG A  70     -42.977   6.694 -12.360  1.00 62.69           C  
ATOM    993  HB2 ARG A  70     -43.786   6.332 -12.994  1.00 62.69           H  
ATOM    994  HB3 ARG A  70     -43.342   7.553 -11.796  1.00 62.69           H  
ATOM    995  O   ARG A  70     -40.318   5.657 -10.626  1.00 62.69           O  
ATOM    996  CG  ARG A  70     -41.812   7.137 -13.267  1.00 62.69           C  
ATOM    997  HG2 ARG A  70     -41.334   6.244 -13.670  1.00 62.69           H  
ATOM    998  HG3 ARG A  70     -41.071   7.680 -12.680  1.00 62.69           H  
ATOM    999  CD  ARG A  70     -42.253   8.003 -14.463  1.00 62.69           C  
ATOM   1000  HD2 ARG A  70     -41.414   8.064 -15.157  1.00 62.69           H  
ATOM   1001  HD3 ARG A  70     -43.075   7.504 -14.976  1.00 62.69           H  
ATOM   1002  NE  ARG A  70     -42.652   9.378 -14.089  1.00 62.69           N  
ATOM   1003  HE  ARG A  70     -42.538   9.649 -13.123  1.00 62.69           H  
ATOM   1004  NH1 ARG A  70     -43.245  10.095 -16.203  1.00 62.69           N  
ATOM   1005 HH11 ARG A  70     -43.573  10.826 -16.817  1.00 62.69           H  
ATOM   1006 HH12 ARG A  70     -43.036   9.187 -16.592  1.00 62.69           H  
ATOM   1007  NH2 ARG A  70     -43.364  11.512 -14.495  1.00 62.69           N  
ATOM   1008 HH21 ARG A  70     -43.695  12.212 -15.144  1.00 62.69           H  
ATOM   1009 HH22 ARG A  70     -43.255  11.758 -13.521  1.00 62.69           H  
ATOM   1010  CZ  ARG A  70     -43.083  10.315 -14.926  1.00 62.69           C  
ATOM   1011  N   ASN A  71     -41.835   6.642  -9.307  1.00 74.15           N  
ATOM   1012  H   ASN A  71     -42.818   6.816  -9.153  1.00 74.15           H  
ATOM   1013  CA  ASN A  71     -40.889   7.186  -8.328  1.00 74.15           C  
ATOM   1014  HA  ASN A  71     -40.029   7.573  -8.873  1.00 74.15           H  
ATOM   1015  C   ASN A  71     -40.337   6.116  -7.359  1.00 74.15           C  
ATOM   1016  CB  ASN A  71     -41.545   8.377  -7.595  1.00 74.15           C  
ATOM   1017  HB2 ASN A  71     -42.451   8.043  -7.090  1.00 74.15           H  
ATOM   1018  HB3 ASN A  71     -40.852   8.746  -6.839  1.00 74.15           H  
ATOM   1019  O   ASN A  71     -39.441   6.414  -6.561  1.00 74.15           O  
ATOM   1020  CG  ASN A  71     -41.903   9.553  -8.499  1.00 74.15           C  
ATOM   1021  ND2 ASN A  71     -42.275  10.672  -7.923  1.00 74.15           N  
ATOM   1022 HD21 ASN A  71     -42.334  10.759  -6.919  1.00 74.15           H  
ATOM   1023 HD22 ASN A  71     -42.496  11.445  -8.535  1.00 74.15           H  
ATOM   1024  OD1 ASN A  71     -41.865   9.492  -9.718  1.00 74.15           O  
ATOM   1025  N   ALA A  72     -40.835   4.876  -7.424  1.00 79.59           N  
ATOM   1026  H   ALA A  72     -41.606   4.709  -8.054  1.00 79.59           H  
ATOM   1027  CA  ALA A  72     -40.214   3.701  -6.811  1.00 79.59           C  
ATOM   1028  HA  ALA A  72     -39.571   4.011  -5.988  1.00 79.59           H  
ATOM   1029  C   ALA A  72     -39.325   2.959  -7.826  1.00 79.59           C  
ATOM   1030  CB  ALA A  72     -41.313   2.806  -6.224  1.00 79.59           C  
ATOM   1031  HB1 ALA A  72     -41.981   2.454  -7.011  1.00 79.59           H  
ATOM   1032  HB2 ALA A  72     -40.860   1.944  -5.735  1.00 79.59           H  
ATOM   1033  HB3 ALA A  72     -41.892   3.363  -5.488  1.00 79.59           H  
ATOM   1034  O   ALA A  72     -38.148   2.722  -7.549  1.00 79.59           O  
ATOM   1035  N   PHE A  73     -39.850   2.676  -9.027  1.00 84.37           N  
ATOM   1036  H   PHE A  73     -40.819   2.906  -9.194  1.00 84.37           H  
ATOM   1037  CA  PHE A  73     -39.113   1.994 -10.099  1.00 84.37           C  
ATOM   1038  HA  PHE A  73     -38.823   1.002  -9.751  1.00 84.37           H  
ATOM   1039  C   PHE A  73     -37.820   2.731 -10.481  1.00 84.37           C  
ATOM   1040  CB  PHE A  73     -40.030   1.819 -11.318  1.00 84.37           C  
ATOM   1041  HB2 PHE A  73     -40.358   2.798 -11.666  1.00 84.37           H  
ATOM   1042  HB3 PHE A  73     -40.918   1.264 -11.015  1.00 84.37           H  
ATOM   1043  O   PHE A  73     -36.754   2.123 -10.488  1.00 84.37           O  
ATOM   1044  CG  PHE A  73     -39.367   1.080 -12.466  1.00 84.37           C  
ATOM   1045  CD1 PHE A  73     -38.774   1.795 -13.525  1.00 84.37           C  
ATOM   1046  HD1 PHE A  73     -38.803   2.875 -13.541  1.00 84.37           H  
ATOM   1047  CD2 PHE A  73     -39.318  -0.328 -12.463  1.00 84.37           C  
ATOM   1048  HD2 PHE A  73     -39.771  -0.890 -11.659  1.00 84.37           H  
ATOM   1049  CE1 PHE A  73     -38.139   1.107 -14.574  1.00 84.37           C  
ATOM   1050  HE1 PHE A  73     -37.693   1.652 -15.393  1.00 84.37           H  
ATOM   1051  CE2 PHE A  73     -38.683  -1.015 -13.513  1.00 84.37           C  
ATOM   1052  HE2 PHE A  73     -38.652  -2.094 -13.519  1.00 84.37           H  
ATOM   1053  CZ  PHE A  73     -38.094  -0.298 -14.568  1.00 84.37           C  
ATOM   1054  HZ  PHE A  73     -37.613  -0.826 -15.379  1.00 84.37           H  
ATOM   1055  N   TYR A  74     -37.887   4.053 -10.674  1.00 83.74           N  
ATOM   1056  H   TYR A  74     -38.800   4.486 -10.662  1.00 83.74           H  
ATOM   1057  CA  TYR A  74     -36.739   4.923 -10.967  1.00 83.74           C  
ATOM   1058  HA  TYR A  74     -36.363   4.697 -11.965  1.00 83.74           H  
ATOM   1059  C   TYR A  74     -35.580   4.729  -9.976  1.00 83.74           C  
ATOM   1060  CB  TYR A  74     -37.252   6.374 -10.949  1.00 83.74           C  
ATOM   1061  HB2 TYR A  74     -37.698   6.575  -9.975  1.00 83.74           H  
ATOM   1062  HB3 TYR A  74     -38.049   6.460 -11.688  1.00 83.74           H  
ATOM   1063  O   TYR A  74     -34.425   4.649 -10.383  1.00 83.74           O  
ATOM   1064  CG  TYR A  74     -36.239   7.470 -11.230  1.00 83.74           C  
ATOM   1065  CD1 TYR A  74     -35.378   7.919 -10.208  1.00 83.74           C  
ATOM   1066  HD1 TYR A  74     -35.387   7.449  -9.236  1.00 83.74           H  
ATOM   1067  CD2 TYR A  74     -36.210   8.099 -12.492  1.00 83.74           C  
ATOM   1068  HD2 TYR A  74     -36.871   7.770 -13.280  1.00 83.74           H  
ATOM   1069  CE1 TYR A  74     -34.486   8.978 -10.447  1.00 83.74           C  
ATOM   1070  HE1 TYR A  74     -33.825   9.311  -9.661  1.00 83.74           H  
ATOM   1071  CE2 TYR A  74     -35.323   9.168 -12.730  1.00 83.74           C  
ATOM   1072  HE2 TYR A  74     -35.297   9.656 -13.693  1.00 83.74           H  
ATOM   1073  OH  TYR A  74     -33.571  10.611 -11.935  1.00 83.74           O  
ATOM   1074  HH  TYR A  74     -33.047  10.772 -11.147  1.00 83.74           H  
ATOM   1075  CZ  TYR A  74     -34.448   9.598 -11.713  1.00 83.74           C  
ATOM   1076  N   ARG A  75     -35.872   4.588  -8.673  1.00 83.08           N  
ATOM   1077  H   ARG A  75     -36.846   4.540  -8.410  1.00 83.08           H  
ATOM   1078  CA  ARG A  75     -34.841   4.403  -7.637  1.00 83.08           C  
ATOM   1079  HA  ARG A  75     -33.975   5.009  -7.902  1.00 83.08           H  
ATOM   1080  C   ARG A  75     -34.293   2.976  -7.580  1.00 83.08           C  
ATOM   1081  CB  ARG A  75     -35.350   4.887  -6.272  1.00 83.08           C  
ATOM   1082  HB2 ARG A  75     -36.371   4.541  -6.110  1.00 83.08           H  
ATOM   1083  HB3 ARG A  75     -34.716   4.472  -5.488  1.00 83.08           H  
ATOM   1084  O   ARG A  75     -33.099   2.822  -7.333  1.00 83.08           O  
ATOM   1085  CG  ARG A  75     -35.277   6.421  -6.186  1.00 83.08           C  
ATOM   1086  HG2 ARG A  75     -34.238   6.727  -6.314  1.00 83.08           H  
ATOM   1087  HG3 ARG A  75     -35.867   6.869  -6.986  1.00 83.08           H  
ATOM   1088  CD  ARG A  75     -35.772   6.952  -4.836  1.00 83.08           C  
ATOM   1089  HD2 ARG A  75     -35.463   7.994  -4.747  1.00 83.08           H  
ATOM   1090  HD3 ARG A  75     -35.301   6.381  -4.036  1.00 83.08           H  
ATOM   1091  NE  ARG A  75     -37.241   6.879  -4.729  1.00 83.08           N  
ATOM   1092  HE  ARG A  75     -37.756   6.673  -5.573  1.00 83.08           H  
ATOM   1093  NH1 ARG A  75     -37.470   7.382  -2.494  1.00 83.08           N  
ATOM   1094 HH11 ARG A  75     -36.465   7.391  -2.391  1.00 83.08           H  
ATOM   1095 HH12 ARG A  75     -38.066   7.530  -1.692  1.00 83.08           H  
ATOM   1096  NH2 ARG A  75     -39.274   7.039  -3.769  1.00 83.08           N  
ATOM   1097 HH21 ARG A  75     -39.655   6.815  -4.677  1.00 83.08           H  
ATOM   1098 HH22 ARG A  75     -39.875   7.190  -2.971  1.00 83.08           H  
ATOM   1099  CZ  ARG A  75     -37.981   7.102  -3.661  1.00 83.08           C  
ATOM   1100  N   LYS A  76     -35.100   1.945  -7.874  1.00 85.91           N  
ATOM   1101  H   LYS A  76     -36.068   2.136  -8.089  1.00 85.91           H  
ATOM   1102  CA  LYS A  76     -34.561   0.588  -8.086  1.00 85.91           C  
ATOM   1103  HA  LYS A  76     -33.868   0.368  -7.274  1.00 85.91           H  
ATOM   1104  C   LYS A  76     -33.685   0.521  -9.343  1.00 85.91           C  
ATOM   1105  CB  LYS A  76     -35.655  -0.502  -8.073  1.00 85.91           C  
ATOM   1106  HB2 LYS A  76     -36.498  -0.205  -8.698  1.00 85.91           H  
ATOM   1107  HB3 LYS A  76     -35.222  -1.406  -8.500  1.00 85.91           H  
ATOM   1108  O   LYS A  76     -32.632  -0.100  -9.278  1.00 85.91           O  
ATOM   1109  CG  LYS A  76     -36.137  -0.826  -6.642  1.00 85.91           C  
ATOM   1110  HG2 LYS A  76     -36.908  -0.113  -6.352  1.00 85.91           H  
ATOM   1111  HG3 LYS A  76     -35.297  -0.713  -5.956  1.00 85.91           H  
ATOM   1112  CD  LYS A  76     -36.670  -2.266  -6.486  1.00 85.91           C  
ATOM   1113  HD2 LYS A  76     -37.580  -2.390  -7.072  1.00 85.91           H  
ATOM   1114  HD3 LYS A  76     -35.912  -2.957  -6.857  1.00 85.91           H  
ATOM   1115  CE  LYS A  76     -36.943  -2.574  -5.000  1.00 85.91           C  
ATOM   1116  HE2 LYS A  76     -36.095  -2.214  -4.417  1.00 85.91           H  
ATOM   1117  HE3 LYS A  76     -37.820  -2.011  -4.678  1.00 85.91           H  
ATOM   1118  NZ  LYS A  76     -37.132  -4.026  -4.721  1.00 85.91           N  
ATOM   1119  HZ1 LYS A  76     -36.316  -4.554  -4.997  1.00 85.91           H  
ATOM   1120  HZ2 LYS A  76     -37.936  -4.399  -5.205  1.00 85.91           H  
ATOM   1121  HZ3 LYS A  76     -37.255  -4.181  -3.731  1.00 85.91           H  
ATOM   1122  N   LEU A  77     -34.043   1.221 -10.424  1.00 88.75           N  
ATOM   1123  H   LEU A  77     -34.949   1.667 -10.425  1.00 88.75           H  
ATOM   1124  CA  LEU A  77     -33.229   1.315 -11.641  1.00 88.75           C  
ATOM   1125  HA  LEU A  77     -32.964   0.300 -11.939  1.00 88.75           H  
ATOM   1126  C   LEU A  77     -31.908   2.071 -11.408  1.00 88.75           C  
ATOM   1127  CB  LEU A  77     -34.075   1.938 -12.767  1.00 88.75           C  
ATOM   1128  HB2 LEU A  77     -34.383   2.938 -12.462  1.00 88.75           H  
ATOM   1129  HB3 LEU A  77     -34.974   1.337 -12.900  1.00 88.75           H  
ATOM   1130  O   LEU A  77     -30.859   1.576 -11.809  1.00 88.75           O  
ATOM   1131  CG  LEU A  77     -33.349   2.046 -14.124  1.00 88.75           C  
ATOM   1132  HG  LEU A  77     -32.469   2.681 -14.015  1.00 88.75           H  
ATOM   1133  CD1 LEU A  77     -32.915   0.684 -14.670  1.00 88.75           C  
ATOM   1134 HD11 LEU A  77     -32.157   0.240 -14.026  1.00 88.75           H  
ATOM   1135 HD12 LEU A  77     -33.772   0.014 -14.744  1.00 88.75           H  
ATOM   1136 HD13 LEU A  77     -32.478   0.809 -15.661  1.00 88.75           H  
ATOM   1137  CD2 LEU A  77     -34.282   2.697 -15.143  1.00 88.75           C  
ATOM   1138 HD21 LEU A  77     -34.590   3.682 -14.793  1.00 88.75           H  
ATOM   1139 HD22 LEU A  77     -33.759   2.816 -16.092  1.00 88.75           H  
ATOM   1140 HD23 LEU A  77     -35.161   2.071 -15.301  1.00 88.75           H  
ATOM   1141  N   GLN A  78     -31.927   3.211 -10.702  1.00 88.76           N  
ATOM   1142  H   GLN A  78     -32.819   3.620 -10.462  1.00 88.76           H  
ATOM   1143  CA  GLN A  78     -30.695   3.894 -10.278  1.00 88.76           C  
ATOM   1144  HA  GLN A  78     -30.124   4.188 -11.158  1.00 88.76           H  
ATOM   1145  C   GLN A  78     -29.795   2.971  -9.447  1.00 88.76           C  
ATOM   1146  CB  GLN A  78     -30.992   5.142  -9.435  1.00 88.76           C  
ATOM   1147  HB2 GLN A  78     -31.725   4.897  -8.666  1.00 88.76           H  
ATOM   1148  HB3 GLN A  78     -30.064   5.420  -8.935  1.00 88.76           H  
ATOM   1149  O   GLN A  78     -28.614   2.849  -9.754  1.00 88.76           O  
ATOM   1150  CG  GLN A  78     -31.456   6.377 -10.210  1.00 88.76           C  
ATOM   1151  HG2 GLN A  78     -32.430   6.204 -10.668  1.00 88.76           H  
ATOM   1152  HG3 GLN A  78     -30.735   6.601 -10.996  1.00 88.76           H  
ATOM   1153  CD  GLN A  78     -31.547   7.569  -9.265  1.00 88.76           C  
ATOM   1154  NE2 GLN A  78     -30.666   8.541  -9.368  1.00 88.76           N  
ATOM   1155 HE21 GLN A  78     -30.687   9.231  -8.631  1.00 88.76           H  
ATOM   1156 HE22 GLN A  78     -29.910   8.467 -10.034  1.00 88.76           H  
ATOM   1157  OE1 GLN A  78     -32.383   7.637  -8.375  1.00 88.76           O  
ATOM   1158  N   ASN A  79     -30.337   2.298  -8.424  1.00 87.07           N  
ATOM   1159  H   ASN A  79     -31.309   2.445  -8.191  1.00 87.07           H  
ATOM   1160  CA  ASN A  79     -29.531   1.421  -7.575  1.00 87.07           C  
ATOM   1161  HA  ASN A  79     -28.660   1.985  -7.240  1.00 87.07           H  
ATOM   1162  C   ASN A  79     -29.001   0.200  -8.343  1.00 87.07           C  
ATOM   1163  CB  ASN A  79     -30.337   1.014  -6.333  1.00 87.07           C  
ATOM   1164  HB2 ASN A  79     -31.158   0.357  -6.617  1.00 87.07           H  
ATOM   1165  HB3 ASN A  79     -30.749   1.905  -5.857  1.00 87.07           H  
ATOM   1166  O   ASN A  79     -27.857  -0.193  -8.132  1.00 87.07           O  
ATOM   1167  CG  ASN A  79     -29.438   0.326  -5.318  1.00 87.07           C  
ATOM   1168  ND2 ASN A  79     -29.534  -0.974  -5.158  1.00 87.07           N  
ATOM   1169 HD21 ASN A  79     -30.169  -1.536  -5.706  1.00 87.07           H  
ATOM   1170 HD22 ASN A  79     -28.898  -1.391  -4.493  1.00 87.07           H  
ATOM   1171  OD1 ASN A  79     -28.611   0.954  -4.685  1.00 87.07           O  
ATOM   1172  N   PHE A  80     -29.793  -0.376  -9.252  1.00 88.03           N  
ATOM   1173  H   PHE A  80     -30.735  -0.031  -9.368  1.00 88.03           H  
ATOM   1174  CA  PHE A  80     -29.357  -1.463 -10.129  1.00 88.03           C  
ATOM   1175  HA  PHE A  80     -28.999  -2.290  -9.516  1.00 88.03           H  
ATOM   1176  C   PHE A  80     -28.184  -1.023 -11.010  1.00 88.03           C  
ATOM   1177  CB  PHE A  80     -30.542  -1.966 -10.965  1.00 88.03           C  
ATOM   1178  HB2 PHE A  80     -30.983  -1.128 -11.504  1.00 88.03           H  
ATOM   1179  HB3 PHE A  80     -31.304  -2.360 -10.293  1.00 88.03           H  
ATOM   1180  O   PHE A  80     -27.120  -1.625 -10.929  1.00 88.03           O  
ATOM   1181  CG  PHE A  80     -30.175  -3.050 -11.961  1.00 88.03           C  
ATOM   1182  CD1 PHE A  80     -30.049  -2.742 -13.330  1.00 88.03           C  
ATOM   1183  HD1 PHE A  80     -30.217  -1.735 -13.682  1.00 88.03           H  
ATOM   1184  CD2 PHE A  80     -29.943  -4.366 -11.518  1.00 88.03           C  
ATOM   1185  HD2 PHE A  80     -30.028  -4.611 -10.470  1.00 88.03           H  
ATOM   1186  CE1 PHE A  80     -29.701  -3.747 -14.250  1.00 88.03           C  
ATOM   1187  HE1 PHE A  80     -29.604  -3.512 -15.300  1.00 88.03           H  
ATOM   1188  CE2 PHE A  80     -29.596  -5.370 -12.440  1.00 88.03           C  
ATOM   1189  HE2 PHE A  80     -29.417  -6.380 -12.101  1.00 88.03           H  
ATOM   1190  CZ  PHE A  80     -29.477  -5.061 -13.806  1.00 88.03           C  
ATOM   1191  HZ  PHE A  80     -29.210  -5.832 -14.514  1.00 88.03           H  
ATOM   1192  N   LEU A  81     -28.327   0.067 -11.772  1.00 89.32           N  
ATOM   1193  H   LEU A  81     -29.213   0.552 -11.769  1.00 89.32           H  
ATOM   1194  CA  LEU A  81     -27.262   0.559 -12.653  1.00 89.32           C  
ATOM   1195  HA  LEU A  81     -26.919  -0.268 -13.274  1.00 89.32           H  
ATOM   1196  C   LEU A  81     -26.024   1.027 -11.872  1.00 89.32           C  
ATOM   1197  CB  LEU A  81     -27.814   1.669 -13.567  1.00 89.32           C  
ATOM   1198  HB2 LEU A  81     -28.260   2.445 -12.946  1.00 89.32           H  
ATOM   1199  HB3 LEU A  81     -26.981   2.115 -14.111  1.00 89.32           H  
ATOM   1200  O   LEU A  81     -24.905   0.760 -12.300  1.00 89.32           O  
ATOM   1201  CG  LEU A  81     -28.856   1.182 -14.595  1.00 89.32           C  
ATOM   1202  HG  LEU A  81     -29.690   0.711 -14.075  1.00 89.32           H  
ATOM   1203  CD1 LEU A  81     -29.399   2.373 -15.383  1.00 89.32           C  
ATOM   1204 HD11 LEU A  81     -30.140   2.032 -16.106  1.00 89.32           H  
ATOM   1205 HD12 LEU A  81     -28.588   2.866 -15.917  1.00 89.32           H  
ATOM   1206 HD13 LEU A  81     -29.873   3.081 -14.702  1.00 89.32           H  
ATOM   1207  CD2 LEU A  81     -28.280   0.179 -15.596  1.00 89.32           C  
ATOM   1208 HD21 LEU A  81     -28.001  -0.746 -15.092  1.00 89.32           H  
ATOM   1209 HD22 LEU A  81     -27.404   0.599 -16.091  1.00 89.32           H  
ATOM   1210 HD23 LEU A  81     -29.029  -0.065 -16.350  1.00 89.32           H  
ATOM   1211  N   TYR A  82     -26.192   1.649 -10.700  1.00 87.50           N  
ATOM   1212  H   TYR A  82     -27.128   1.870 -10.390  1.00 87.50           H  
ATOM   1213  CA  TYR A  82     -25.058   2.033  -9.857  1.00 87.50           C  
ATOM   1214  HA  TYR A  82     -24.359   2.600 -10.471  1.00 87.50           H  
ATOM   1215  C   TYR A  82     -24.290   0.812  -9.330  1.00 87.50           C  
ATOM   1216  CB  TYR A  82     -25.516   2.935  -8.702  1.00 87.50           C  
ATOM   1217  HB2 TYR A  82     -26.207   2.381  -8.066  1.00 87.50           H  
ATOM   1218  HB3 TYR A  82     -26.050   3.797  -9.100  1.00 87.50           H  
ATOM   1219  O   TYR A  82     -23.063   0.823  -9.335  1.00 87.50           O  
ATOM   1220  CG  TYR A  82     -24.354   3.447  -7.871  1.00 87.50           C  
ATOM   1221  CD1 TYR A  82     -24.155   2.973  -6.560  1.00 87.50           C  
ATOM   1222  HD1 TYR A  82     -24.852   2.270  -6.128  1.00 87.50           H  
ATOM   1223  CD2 TYR A  82     -23.428   4.342  -8.442  1.00 87.50           C  
ATOM   1224  HD2 TYR A  82     -23.560   4.683  -9.459  1.00 87.50           H  
ATOM   1225  CE1 TYR A  82     -23.033   3.394  -5.819  1.00 87.50           C  
ATOM   1226  HE1 TYR A  82     -22.883   3.021  -4.817  1.00 87.50           H  
ATOM   1227  CE2 TYR A  82     -22.306   4.764  -7.705  1.00 87.50           C  
ATOM   1228  HE2 TYR A  82     -21.571   5.415  -8.154  1.00 87.50           H  
ATOM   1229  OH  TYR A  82     -21.025   4.702  -5.673  1.00 87.50           O  
ATOM   1230  HH  TYR A  82     -20.965   4.210  -4.851  1.00 87.50           H  
ATOM   1231  CZ  TYR A  82     -22.107   4.294  -6.390  1.00 87.50           C  
ATOM   1232  N   ASN A  83     -24.979  -0.265  -8.934  1.00 85.86           N  
ATOM   1233  H   ASN A  83     -25.988  -0.245  -8.974  1.00 85.86           H  
ATOM   1234  CA  ASN A  83     -24.311  -1.497  -8.514  1.00 85.86           C  
ATOM   1235  HA  ASN A  83     -23.462  -1.228  -7.885  1.00 85.86           H  
ATOM   1236  C   ASN A  83     -23.707  -2.261  -9.702  1.00 85.86           C  
ATOM   1237  CB  ASN A  83     -25.255  -2.361  -7.662  1.00 85.86           C  
ATOM   1238  HB2 ASN A  83     -26.243  -2.412  -8.119  1.00 85.86           H  
ATOM   1239  HB3 ASN A  83     -24.854  -3.373  -7.606  1.00 85.86           H  
ATOM   1240  O   ASN A  83     -22.569  -2.696  -9.599  1.00 85.86           O  
ATOM   1241  CG  ASN A  83     -25.353  -1.839  -6.239  1.00 85.86           C  
ATOM   1242  ND2 ASN A  83     -26.303  -0.990  -5.942  1.00 85.86           N  
ATOM   1243 HD21 ASN A  83     -26.368  -0.660  -4.990  1.00 85.86           H  
ATOM   1244 HD22 ASN A  83     -26.938  -0.684  -6.666  1.00 85.86           H  
ATOM   1245  OD1 ASN A  83     -24.547  -2.157  -5.382  1.00 85.86           O  
ATOM   1246  N   VAL A  84     -24.393  -2.367 -10.845  1.00 86.90           N  
ATOM   1247  H   VAL A  84     -25.333  -2.000 -10.884  1.00 86.90           H  
ATOM   1248  CA  VAL A  84     -23.841  -3.004 -12.057  1.00 86.90           C  
ATOM   1249  HA  VAL A  84     -23.546  -4.023 -11.806  1.00 86.90           H  
ATOM   1250  C   VAL A  84     -22.568  -2.295 -12.527  1.00 86.90           C  
ATOM   1251  CB  VAL A  84     -24.900  -3.075 -13.178  1.00 86.90           C  
ATOM   1252  HB  VAL A  84     -25.375  -2.100 -13.280  1.00 86.90           H  
ATOM   1253  O   VAL A  84     -21.617  -2.966 -12.918  1.00 86.90           O  
ATOM   1254  CG1 VAL A  84     -24.326  -3.473 -14.546  1.00 86.90           C  
ATOM   1255 HG11 VAL A  84     -23.772  -4.408 -14.466  1.00 86.90           H  
ATOM   1256 HG12 VAL A  84     -23.662  -2.695 -14.921  1.00 86.90           H  
ATOM   1257 HG13 VAL A  84     -25.134  -3.597 -15.267  1.00 86.90           H  
ATOM   1258  CG2 VAL A  84     -25.970  -4.117 -12.825  1.00 86.90           C  
ATOM   1259 HG21 VAL A  84     -25.529  -5.113 -12.795  1.00 86.90           H  
ATOM   1260 HG22 VAL A  84     -26.760  -4.097 -13.577  1.00 86.90           H  
ATOM   1261 HG23 VAL A  84     -26.416  -3.899 -11.855  1.00 86.90           H  
ATOM   1262  N   LEU A  85     -22.497  -0.962 -12.438  1.00 86.19           N  
ATOM   1263  H   LEU A  85     -23.319  -0.447 -12.159  1.00 86.19           H  
ATOM   1264  CA  LEU A  85     -21.283  -0.221 -12.782  1.00 86.19           C  
ATOM   1265  HA  LEU A  85     -20.830  -0.703 -13.649  1.00 86.19           H  
ATOM   1266  C   LEU A  85     -20.215  -0.287 -11.679  1.00 86.19           C  
ATOM   1267  CB  LEU A  85     -21.635   1.222 -13.190  1.00 86.19           C  
ATOM   1268  HB2 LEU A  85     -20.707   1.778 -13.321  1.00 86.19           H  
ATOM   1269  HB3 LEU A  85     -22.195   1.690 -12.381  1.00 86.19           H  
ATOM   1270  O   LEU A  85     -19.076  -0.659 -11.959  1.00 86.19           O  
ATOM   1271  CG  LEU A  85     -22.449   1.330 -14.499  1.00 86.19           C  
ATOM   1272  HG  LEU A  85     -23.387   0.784 -14.398  1.00 86.19           H  
ATOM   1273  CD1 LEU A  85     -22.778   2.796 -14.780  1.00 86.19           C  
ATOM   1274 HD11 LEU A  85     -21.855   3.356 -14.932  1.00 86.19           H  
ATOM   1275 HD12 LEU A  85     -23.379   2.867 -15.687  1.00 86.19           H  
ATOM   1276 HD13 LEU A  85     -23.341   3.215 -13.946  1.00 86.19           H  
ATOM   1277  CD2 LEU A  85     -21.698   0.767 -15.707  1.00 86.19           C  
ATOM   1278 HD21 LEU A  85     -20.704   1.210 -15.771  1.00 86.19           H  
ATOM   1279 HD22 LEU A  85     -22.242   0.995 -16.624  1.00 86.19           H  
ATOM   1280 HD23 LEU A  85     -21.615  -0.317 -15.635  1.00 86.19           H  
ATOM   1281  N   GLU A  86     -20.530   0.068 -10.431  1.00 80.21           N  
ATOM   1282  H   GLU A  86     -21.482   0.340 -10.233  1.00 80.21           H  
ATOM   1283  CA  GLU A  86     -19.530   0.252  -9.362  1.00 80.21           C  
ATOM   1284  HA  GLU A  86     -18.599   0.574  -9.829  1.00 80.21           H  
ATOM   1285  C   GLU A  86     -19.183  -1.043  -8.586  1.00 80.21           C  
ATOM   1286  CB  GLU A  86     -19.985   1.399  -8.433  1.00 80.21           C  
ATOM   1287  HB2 GLU A  86     -20.502   0.968  -7.576  1.00 80.21           H  
ATOM   1288  HB3 GLU A  86     -20.691   2.047  -8.951  1.00 80.21           H  
ATOM   1289  O   GLU A  86     -18.208  -1.077  -7.829  1.00 80.21           O  
ATOM   1290  CG  GLU A  86     -18.829   2.282  -7.933  1.00 80.21           C  
ATOM   1291  HG2 GLU A  86     -17.958   1.666  -7.711  1.00 80.21           H  
ATOM   1292  HG3 GLU A  86     -19.142   2.743  -6.996  1.00 80.21           H  
ATOM   1293  CD  GLU A  86     -18.443   3.395  -8.927  1.00 80.21           C  
ATOM   1294  OE1 GLU A  86     -18.484   4.582  -8.518  1.00 80.21           O  
ATOM   1295  OE2 GLU A  86     -18.048   3.089 -10.074  1.00 80.21           O  
ATOM   1296  N   ARG A  87     -19.939  -2.135  -8.774  1.00 76.02           N  
ATOM   1297  H   ARG A  87     -20.742  -2.053  -9.381  1.00 76.02           H  
ATOM   1298  CA  ARG A  87     -19.704  -3.456  -8.160  1.00 76.02           C  
ATOM   1299  HA  ARG A  87     -18.733  -3.450  -7.666  1.00 76.02           H  
ATOM   1300  C   ARG A  87     -19.670  -4.582  -9.216  1.00 76.02           C  
ATOM   1301  CB  ARG A  87     -20.758  -3.757  -7.071  1.00 76.02           C  
ATOM   1302  HB2 ARG A  87     -21.751  -3.842  -7.511  1.00 76.02           H  
ATOM   1303  HB3 ARG A  87     -20.507  -4.730  -6.648  1.00 76.02           H  
ATOM   1304  O   ARG A  87     -20.688  -5.238  -9.434  1.00 76.02           O  
ATOM   1305  CG  ARG A  87     -20.816  -2.725  -5.935  1.00 76.02           C  
ATOM   1306  HG2 ARG A  87     -21.340  -1.830  -6.269  1.00 76.02           H  
ATOM   1307  HG3 ARG A  87     -19.802  -2.447  -5.650  1.00 76.02           H  
ATOM   1308  CD  ARG A  87     -21.540  -3.324  -4.720  1.00 76.02           C  
ATOM   1309  HD2 ARG A  87     -21.169  -4.335  -4.551  1.00 76.02           H  
ATOM   1310  HD3 ARG A  87     -22.607  -3.406  -4.926  1.00 76.02           H  
ATOM   1311  NE  ARG A  87     -21.279  -2.560  -3.489  1.00 76.02           N  
ATOM   1312  HE  ARG A  87     -20.329  -2.559  -3.147  1.00 76.02           H  
ATOM   1313  NH1 ARG A  87     -23.417  -1.997  -2.810  1.00 76.02           N  
ATOM   1314 HH11 ARG A  87     -23.804  -2.240  -3.710  1.00 76.02           H  
ATOM   1315 HH12 ARG A  87     -24.030  -1.716  -2.058  1.00 76.02           H  
ATOM   1316  NH2 ARG A  87     -21.675  -1.681  -1.464  1.00 76.02           N  
ATOM   1317 HH21 ARG A  87     -22.301  -1.355  -0.742  1.00 76.02           H  
ATOM   1318 HH22 ARG A  87     -20.690  -1.820  -1.285  1.00 76.02           H  
ATOM   1319  CZ  ARG A  87     -22.137  -2.083  -2.609  1.00 76.02           C  
ATOM   1320  N   PRO A  88     -18.507  -4.888  -9.827  1.00 76.67           N  
ATOM   1321  CA  PRO A  88     -18.360  -6.055 -10.702  1.00 76.67           C  
ATOM   1322  HA  PRO A  88     -19.095  -6.010 -11.507  1.00 76.67           H  
ATOM   1323  C   PRO A  88     -18.558  -7.370  -9.922  1.00 76.67           C  
ATOM   1324  CB  PRO A  88     -16.953  -5.931 -11.309  1.00 76.67           C  
ATOM   1325  HB2 PRO A  88     -16.491  -6.899 -11.502  1.00 76.67           H  
ATOM   1326  HB3 PRO A  88     -16.999  -5.354 -12.233  1.00 76.67           H  
ATOM   1327  O   PRO A  88     -17.631  -7.880  -9.296  1.00 76.67           O  
ATOM   1328  CG  PRO A  88     -16.177  -5.125 -10.270  1.00 76.67           C  
ATOM   1329  HG2 PRO A  88     -15.342  -4.585 -10.717  1.00 76.67           H  
ATOM   1330  HG3 PRO A  88     -15.826  -5.784  -9.476  1.00 76.67           H  
ATOM   1331  CD  PRO A  88     -17.239  -4.173  -9.722  1.00 76.67           C  
ATOM   1332  HD2 PRO A  88     -17.282  -3.275 -10.338  1.00 76.67           H  
ATOM   1333  HD3 PRO A  88     -16.992  -3.910  -8.693  1.00 76.67           H  
ATOM   1334  N   ARG A  89     -19.780  -7.919  -9.937  1.00 78.52           N  
ATOM   1335  H   ARG A  89     -20.520  -7.378 -10.360  1.00 78.52           H  
ATOM   1336  CA  ARG A  89     -20.135  -9.248  -9.403  1.00 78.52           C  
ATOM   1337  HA  ARG A  89     -19.248  -9.881  -9.435  1.00 78.52           H  
ATOM   1338  C   ARG A  89     -21.203  -9.921 -10.266  1.00 78.52           C  
ATOM   1339  CB  ARG A  89     -20.630  -9.157  -7.946  1.00 78.52           C  
ATOM   1340  HB2 ARG A  89     -21.437  -8.427  -7.877  1.00 78.52           H  
ATOM   1341  HB3 ARG A  89     -21.030 -10.131  -7.663  1.00 78.52           H  
ATOM   1342  O   ARG A  89     -22.096  -9.252 -10.785  1.00 78.52           O  
ATOM   1343  CG  ARG A  89     -19.518  -8.791  -6.953  1.00 78.52           C  
ATOM   1344  HG2 ARG A  89     -19.265  -7.737  -7.064  1.00 78.52           H  
ATOM   1345  HG3 ARG A  89     -18.633  -9.390  -7.170  1.00 78.52           H  
ATOM   1346  CD  ARG A  89     -19.950  -9.067  -5.507  1.00 78.52           C  
ATOM   1347  HD2 ARG A  89     -20.850  -8.497  -5.277  1.00 78.52           H  
ATOM   1348  HD3 ARG A  89     -20.195 -10.125  -5.412  1.00 78.52           H  
ATOM   1349  NE  ARG A  89     -18.866  -8.747  -4.557  1.00 78.52           N  
ATOM   1350  HE  ARG A  89     -18.213  -9.488  -4.345  1.00 78.52           H  
ATOM   1351  NH1 ARG A  89     -19.410  -6.550  -4.177  1.00 78.52           N  
ATOM   1352 HH11 ARG A  89     -19.152  -5.711  -3.677  1.00 78.52           H  
ATOM   1353 HH12 ARG A  89     -20.282  -6.658  -4.674  1.00 78.52           H  
ATOM   1354  NH2 ARG A  89     -17.594  -7.367  -3.246  1.00 78.52           N  
ATOM   1355 HH21 ARG A  89     -16.918  -8.091  -3.048  1.00 78.52           H  
ATOM   1356 HH22 ARG A  89     -17.489  -6.440  -2.858  1.00 78.52           H  
ATOM   1357  CZ  ARG A  89     -18.630  -7.574  -4.001  1.00 78.52           C  
ATOM   1358  N   GLY A  90     -21.130 -11.249 -10.387  1.00 84.96           N  
ATOM   1359  H   GLY A  90     -20.350 -11.730  -9.962  1.00 84.96           H  
ATOM   1360  CA  GLY A  90     -22.045 -12.031 -11.227  1.00 84.96           C  
ATOM   1361  HA2 GLY A  90     -23.047 -11.991 -10.800  1.00 84.96           H  
ATOM   1362  HA3 GLY A  90     -21.723 -13.072 -11.257  1.00 84.96           H  
ATOM   1363  C   GLY A  90     -22.086 -11.499 -12.663  1.00 84.96           C  
ATOM   1364  O   GLY A  90     -21.055 -11.117 -13.212  1.00 84.96           O  
ATOM   1365  N   TRP A  91     -23.285 -11.395 -13.239  1.00 82.67           N  
ATOM   1366  H   TRP A  91     -24.087 -11.766 -12.749  1.00 82.67           H  
ATOM   1367  CA  TRP A  91     -23.524 -10.893 -14.600  1.00 82.67           C  
ATOM   1368  HA  TRP A  91     -23.121 -11.613 -15.312  1.00 82.67           H  
ATOM   1369  C   TRP A  91     -22.870  -9.535 -14.912  1.00 82.67           C  
ATOM   1370  CB  TRP A  91     -25.041 -10.803 -14.812  1.00 82.67           C  
ATOM   1371  HB2 TRP A  91     -25.232 -10.552 -15.855  1.00 82.67           H  
ATOM   1372  HB3 TRP A  91     -25.438  -9.992 -14.201  1.00 82.67           H  
ATOM   1373  O   TRP A  91     -22.488  -9.296 -16.054  1.00 82.67           O  
ATOM   1374  CG  TRP A  91     -25.792 -12.060 -14.487  1.00 82.67           C  
ATOM   1375  CD1 TRP A  91     -26.589 -12.256 -13.411  1.00 82.67           C  
ATOM   1376  HD1 TRP A  91     -26.808 -11.513 -12.658  1.00 82.67           H  
ATOM   1377  CD2 TRP A  91     -25.810 -13.319 -15.230  1.00 82.67           C  
ATOM   1378  CE2 TRP A  91     -26.631 -14.249 -14.526  1.00 82.67           C  
ATOM   1379  CE3 TRP A  91     -25.216 -13.768 -16.429  1.00 82.67           C  
ATOM   1380  HE3 TRP A  91     -24.601 -13.090 -17.003  1.00 82.67           H  
ATOM   1381  NE1 TRP A  91     -27.082 -13.547 -13.428  1.00 82.67           N  
ATOM   1382  HE1 TRP A  91     -27.718 -13.919 -12.738  1.00 82.67           H  
ATOM   1383  CH2 TRP A  91     -26.234 -15.975 -16.173  1.00 82.67           C  
ATOM   1384  HH2 TRP A  91     -26.389 -16.978 -16.542  1.00 82.67           H  
ATOM   1385  CZ2 TRP A  91     -26.845 -15.559 -14.978  1.00 82.67           C  
ATOM   1386  HZ2 TRP A  91     -27.474 -16.238 -14.422  1.00 82.67           H  
ATOM   1387  CZ3 TRP A  91     -25.424 -15.081 -16.895  1.00 82.67           C  
ATOM   1388  HZ3 TRP A  91     -24.964 -15.404 -17.817  1.00 82.67           H  
ATOM   1389  N   ALA A  92     -22.673  -8.661 -13.915  1.00 86.06           N  
ATOM   1390  H   ALA A  92     -22.927  -8.924 -12.973  1.00 86.06           H  
ATOM   1391  CA  ALA A  92     -22.006  -7.373 -14.121  1.00 86.06           C  
ATOM   1392  HA  ALA A  92     -22.525  -6.841 -14.918  1.00 86.06           H  
ATOM   1393  C   ALA A  92     -20.537  -7.521 -14.565  1.00 86.06           C  
ATOM   1394  CB  ALA A  92     -22.123  -6.542 -12.839  1.00 86.06           C  
ATOM   1395  HB1 ALA A  92     -21.684  -5.559 -13.007  1.00 86.06           H  
ATOM   1396  HB2 ALA A  92     -21.588  -7.027 -12.022  1.00 86.06           H  
ATOM   1397  HB3 ALA A  92     -23.171  -6.421 -12.565  1.00 86.06           H  
ATOM   1398  O   ALA A  92     -20.026  -6.647 -15.260  1.00 86.06           O  
ATOM   1399  N   PHE A  93     -19.866  -8.631 -14.227  1.00 87.73           N  
ATOM   1400  H   PHE A  93     -20.352  -9.359 -13.724  1.00 87.73           H  
ATOM   1401  CA  PHE A  93     -18.509  -8.927 -14.704  1.00 87.73           C  
ATOM   1402  HA  PHE A  93     -17.828  -8.150 -14.355  1.00 87.73           H  
ATOM   1403  C   PHE A  93     -18.427  -8.944 -16.237  1.00 87.73           C  
ATOM   1404  CB  PHE A  93     -18.051 -10.273 -14.124  1.00 87.73           C  
ATOM   1405  HB2 PHE A  93     -18.758 -11.047 -14.422  1.00 87.73           H  
ATOM   1406  HB3 PHE A  93     -18.064 -10.214 -13.035  1.00 87.73           H  
ATOM   1407  O   PHE A  93     -17.467  -8.423 -16.792  1.00 87.73           O  
ATOM   1408  CG  PHE A  93     -16.665 -10.699 -14.573  1.00 87.73           C  
ATOM   1409  CD1 PHE A  93     -16.516 -11.595 -15.650  1.00 87.73           C  
ATOM   1410  HD1 PHE A  93     -17.384 -11.994 -16.154  1.00 87.73           H  
ATOM   1411  CD2 PHE A  93     -15.523 -10.181 -13.933  1.00 87.73           C  
ATOM   1412  HD2 PHE A  93     -15.625  -9.489 -13.110  1.00 87.73           H  
ATOM   1413  CE1 PHE A  93     -15.233 -11.970 -16.085  1.00 87.73           C  
ATOM   1414  HE1 PHE A  93     -15.118 -12.652 -16.914  1.00 87.73           H  
ATOM   1415  CE2 PHE A  93     -14.239 -10.558 -14.369  1.00 87.73           C  
ATOM   1416  HE2 PHE A  93     -13.361 -10.159 -13.883  1.00 87.73           H  
ATOM   1417  CZ  PHE A  93     -14.094 -11.451 -15.444  1.00 87.73           C  
ATOM   1418  HZ  PHE A  93     -13.109 -11.736 -15.782  1.00 87.73           H  
ATOM   1419  N   ILE A  94     -19.459  -9.454 -16.921  1.00 90.16           N  
ATOM   1420  H   ILE A  94     -20.257  -9.794 -16.405  1.00 90.16           H  
ATOM   1421  CA  ILE A  94     -19.502  -9.547 -18.390  1.00 90.16           C  
ATOM   1422  HA  ILE A  94     -18.622 -10.093 -18.728  1.00 90.16           H  
ATOM   1423  C   ILE A  94     -19.439  -8.150 -19.025  1.00 90.16           C  
ATOM   1424  CB  ILE A  94     -20.761 -10.325 -18.850  1.00 90.16           C  
ATOM   1425  HB  ILE A  94     -21.643  -9.757 -18.551  1.00 90.16           H  
ATOM   1426  O   ILE A  94     -18.728  -7.954 -20.007  1.00 90.16           O  
ATOM   1427  CG1 ILE A  94     -20.832 -11.723 -18.183  1.00 90.16           C  
ATOM   1428 HG12 ILE A  94     -19.985 -12.325 -18.512  1.00 90.16           H  
ATOM   1429 HG13 ILE A  94     -20.768 -11.618 -17.100  1.00 90.16           H  
ATOM   1430  CG2 ILE A  94     -20.783 -10.462 -20.385  1.00 90.16           C  
ATOM   1431 HG21 ILE A  94     -19.916 -11.028 -20.725  1.00 90.16           H  
ATOM   1432 HG22 ILE A  94     -21.691 -10.967 -20.715  1.00 90.16           H  
ATOM   1433 HG23 ILE A  94     -20.772  -9.483 -20.864  1.00 90.16           H  
ATOM   1434  CD1 ILE A  94     -22.130 -12.488 -18.468  1.00 90.16           C  
ATOM   1435 HD11 ILE A  94     -22.167 -13.378 -17.839  1.00 90.16           H  
ATOM   1436 HD12 ILE A  94     -22.170 -12.803 -19.511  1.00 90.16           H  
ATOM   1437 HD13 ILE A  94     -22.988 -11.855 -18.243  1.00 90.16           H  
ATOM   1438  N   TYR A  95     -20.113  -7.155 -18.435  1.00 89.81           N  
ATOM   1439  H   TYR A  95     -20.638  -7.355 -17.596  1.00 89.81           H  
ATOM   1440  CA  TYR A  95     -20.051  -5.775 -18.922  1.00 89.81           C  
ATOM   1441  HA  TYR A  95     -20.262  -5.778 -19.992  1.00 89.81           H  
ATOM   1442  C   TYR A  95     -18.654  -5.159 -18.749  1.00 89.81           C  
ATOM   1443  CB  TYR A  95     -21.124  -4.920 -18.234  1.00 89.81           C  
ATOM   1444  HB2 TYR A  95     -22.109  -5.325 -18.470  1.00 89.81           H  
ATOM   1445  HB3 TYR A  95     -20.990  -4.970 -17.154  1.00 89.81           H  
ATOM   1446  O   TYR A  95     -18.146  -4.525 -19.671  1.00 89.81           O  
ATOM   1447  CG  TYR A  95     -21.068  -3.471 -18.677  1.00 89.81           C  
ATOM   1448  CD1 TYR A  95     -20.431  -2.514 -17.864  1.00 89.81           C  
ATOM   1449  HD1 TYR A  95     -20.027  -2.809 -16.907  1.00 89.81           H  
ATOM   1450  CD2 TYR A  95     -21.545  -3.107 -19.951  1.00 89.81           C  
ATOM   1451  HD2 TYR A  95     -22.008  -3.846 -20.587  1.00 89.81           H  
ATOM   1452  CE1 TYR A  95     -20.258  -1.196 -18.328  1.00 89.81           C  
ATOM   1453  HE1 TYR A  95     -19.738  -0.461 -17.731  1.00 89.81           H  
ATOM   1454  CE2 TYR A  95     -21.370  -1.791 -20.421  1.00 89.81           C  
ATOM   1455  HE2 TYR A  95     -21.709  -1.523 -21.411  1.00 89.81           H  
ATOM   1456  OH  TYR A  95     -20.502   0.419 -20.081  1.00 89.81           O  
ATOM   1457  HH  TYR A  95     -20.795   0.529 -20.988  1.00 89.81           H  
ATOM   1458  CZ  TYR A  95     -20.715  -0.837 -19.613  1.00 89.81           C  
ATOM   1459  N   HIS A  96     -17.993  -5.378 -17.607  1.00 88.73           N  
ATOM   1460  H   HIS A  96     -18.437  -5.921 -16.881  1.00 88.73           H  
ATOM   1461  CA  HIS A  96     -16.640  -4.843 -17.388  1.00 88.73           C  
ATOM   1462  HA  HIS A  96     -16.620  -3.819 -17.760  1.00 88.73           H  
ATOM   1463  C   HIS A  96     -15.572  -5.592 -18.195  1.00 88.73           C  
ATOM   1464  CB  HIS A  96     -16.322  -4.766 -15.890  1.00 88.73           C  
ATOM   1465  HB2 HIS A  96     -15.319  -4.361 -15.760  1.00 88.73           H  
ATOM   1466  HB3 HIS A  96     -16.351  -5.767 -15.460  1.00 88.73           H  
ATOM   1467  O   HIS A  96     -14.611  -4.968 -18.632  1.00 88.73           O  
ATOM   1468  CG  HIS A  96     -17.299  -3.869 -15.170  1.00 88.73           C  
ATOM   1469  CD2 HIS A  96     -18.282  -4.301 -14.332  1.00 88.73           C  
ATOM   1470  HD2 HIS A  96     -18.447  -5.323 -14.025  1.00 88.73           H  
ATOM   1471  ND1 HIS A  96     -17.498  -2.510 -15.430  1.00 88.73           N  
ATOM   1472  CE1 HIS A  96     -18.620  -2.176 -14.778  1.00 88.73           C  
ATOM   1473  HE1 HIS A  96     -19.090  -1.205 -14.836  1.00 88.73           H  
ATOM   1474  NE2 HIS A  96     -19.094  -3.221 -14.087  1.00 88.73           N  
ATOM   1475  HE2 HIS A  96     -19.969  -3.230 -13.581  1.00 88.73           H  
ATOM   1476  N   ALA A  97     -15.773  -6.881 -18.484  1.00 88.78           N  
ATOM   1477  H   ALA A  97     -16.548  -7.359 -18.048  1.00 88.78           H  
ATOM   1478  CA  ALA A  97     -14.956  -7.639 -19.430  1.00 88.78           C  
ATOM   1479  HA  ALA A  97     -13.906  -7.510 -19.167  1.00 88.78           H  
ATOM   1480  C   ALA A  97     -15.135  -7.135 -20.876  1.00 88.78           C  
ATOM   1481  CB  ALA A  97     -15.302  -9.127 -19.292  1.00 88.78           C  
ATOM   1482  HB1 ALA A  97     -14.666  -9.711 -19.956  1.00 88.78           H  
ATOM   1483  HB2 ALA A  97     -16.345  -9.298 -19.558  1.00 88.78           H  
ATOM   1484  HB3 ALA A  97     -15.134  -9.453 -18.265  1.00 88.78           H  
ATOM   1485  O   ALA A  97     -14.149  -6.945 -21.581  1.00 88.78           O  
ATOM   1486  N   TYR A  98     -16.368  -6.832 -21.299  1.00 91.06           N  
ATOM   1487  H   TYR A  98     -17.153  -7.062 -20.707  1.00 91.06           H  
ATOM   1488  CA  TYR A  98     -16.642  -6.172 -22.582  1.00 91.06           C  
ATOM   1489  HA  TYR A  98     -16.221  -6.776 -23.386  1.00 91.06           H  
ATOM   1490  C   TYR A  98     -15.972  -4.790 -22.667  1.00 91.06           C  
ATOM   1491  CB  TYR A  98     -18.162  -6.090 -22.792  1.00 91.06           C  
ATOM   1492  HB2 TYR A  98     -18.542  -7.095 -22.975  1.00 91.06           H  
ATOM   1493  HB3 TYR A  98     -18.632  -5.734 -21.875  1.00 91.06           H  
ATOM   1494  O   TYR A  98     -15.298  -4.500 -23.651  1.00 91.06           O  
ATOM   1495  CG  TYR A  98     -18.596  -5.186 -23.930  1.00 91.06           C  
ATOM   1496  CD1 TYR A  98     -19.077  -3.890 -23.651  1.00 91.06           C  
ATOM   1497  HD1 TYR A  98     -19.136  -3.544 -22.629  1.00 91.06           H  
ATOM   1498  CD2 TYR A  98     -18.501  -5.630 -25.263  1.00 91.06           C  
ATOM   1499  HD2 TYR A  98     -18.118  -6.616 -25.478  1.00 91.06           H  
ATOM   1500  CE1 TYR A  98     -19.471  -3.044 -24.705  1.00 91.06           C  
ATOM   1501  HE1 TYR A  98     -19.837  -2.047 -24.509  1.00 91.06           H  
ATOM   1502  CE2 TYR A  98     -18.894  -4.785 -26.320  1.00 91.06           C  
ATOM   1503  HE2 TYR A  98     -18.817  -5.126 -27.342  1.00 91.06           H  
ATOM   1504  OH  TYR A  98     -19.776  -2.667 -27.046  1.00 91.06           O  
ATOM   1505  HH  TYR A  98     -19.649  -3.064 -27.911  1.00 91.06           H  
ATOM   1506  CZ  TYR A  98     -19.384  -3.491 -26.040  1.00 91.06           C  
ATOM   1507  N   VAL A  99     -16.071  -3.965 -21.618  1.00 88.35           N  
ATOM   1508  H   VAL A  99     -16.670  -4.241 -20.853  1.00 88.35           H  
ATOM   1509  CA  VAL A  99     -15.377  -2.665 -21.541  1.00 88.35           C  
ATOM   1510  HA  VAL A  99     -15.632  -2.090 -22.432  1.00 88.35           H  
ATOM   1511  C   VAL A  99     -13.852  -2.830 -21.567  1.00 88.35           C  
ATOM   1512  CB  VAL A  99     -15.855  -1.867 -20.309  1.00 88.35           C  
ATOM   1513  HB  VAL A  99     -15.861  -2.524 -19.439  1.00 88.35           H  
ATOM   1514  O   VAL A  99     -13.182  -2.057 -22.246  1.00 88.35           O  
ATOM   1515  CG1 VAL A  99     -14.980  -0.652 -19.969  1.00 88.35           C  
ATOM   1516 HG11 VAL A  99     -13.998  -0.983 -19.631  1.00 88.35           H  
ATOM   1517 HG12 VAL A  99     -14.855  -0.021 -20.849  1.00 88.35           H  
ATOM   1518 HG13 VAL A  99     -15.439  -0.074 -19.167  1.00 88.35           H  
ATOM   1519  CG2 VAL A  99     -17.280  -1.345 -20.542  1.00 88.35           C  
ATOM   1520 HG21 VAL A  99     -17.296  -0.656 -21.386  1.00 88.35           H  
ATOM   1521 HG22 VAL A  99     -17.957  -2.174 -20.750  1.00 88.35           H  
ATOM   1522 HG23 VAL A  99     -17.636  -0.830 -19.650  1.00 88.35           H  
ATOM   1523  N   PHE A 100     -13.292  -3.841 -20.894  1.00 88.34           N  
ATOM   1524  H   PHE A 100     -13.878  -4.426 -20.316  1.00 88.34           H  
ATOM   1525  CA  PHE A 100     -11.863  -4.159 -20.969  1.00 88.34           C  
ATOM   1526  HA  PHE A 100     -11.291  -3.271 -20.699  1.00 88.34           H  
ATOM   1527  C   PHE A 100     -11.436  -4.527 -22.394  1.00 88.34           C  
ATOM   1528  CB  PHE A 100     -11.513  -5.275 -19.970  1.00 88.34           C  
ATOM   1529  HB2 PHE A 100     -12.163  -6.132 -20.143  1.00 88.34           H  
ATOM   1530  HB3 PHE A 100     -11.707  -4.919 -18.958  1.00 88.34           H  
ATOM   1531  O   PHE A 100     -10.479  -3.949 -22.900  1.00 88.34           O  
ATOM   1532  CG  PHE A 100     -10.071  -5.743 -20.065  1.00 88.34           C  
ATOM   1533  CD1 PHE A 100      -9.726  -6.788 -20.944  1.00 88.34           C  
ATOM   1534  HD1 PHE A 100     -10.488  -7.282 -21.529  1.00 88.34           H  
ATOM   1535  CD2 PHE A 100      -9.065  -5.107 -19.312  1.00 88.34           C  
ATOM   1536  HD2 PHE A 100      -9.321  -4.311 -18.628  1.00 88.34           H  
ATOM   1537  CE1 PHE A 100      -8.383  -7.177 -21.089  1.00 88.34           C  
ATOM   1538  HE1 PHE A 100      -8.118  -7.965 -21.778  1.00 88.34           H  
ATOM   1539  CE2 PHE A 100      -7.722  -5.500 -19.452  1.00 88.34           C  
ATOM   1540  HE2 PHE A 100      -6.948  -5.008 -18.881  1.00 88.34           H  
ATOM   1541  CZ  PHE A 100      -7.380  -6.531 -20.345  1.00 88.34           C  
ATOM   1542  HZ  PHE A 100      -6.348  -6.828 -20.464  1.00 88.34           H  
ATOM   1543  N   LEU A 101     -12.160  -5.427 -23.065  1.00 90.35           N  
ATOM   1544  H   LEU A 101     -12.941  -5.863 -22.595  1.00 90.35           H  
ATOM   1545  CA  LEU A 101     -11.861  -5.838 -24.441  1.00 90.35           C  
ATOM   1546  HA  LEU A 101     -10.821  -6.161 -24.493  1.00 90.35           H  
ATOM   1547  C   LEU A 101     -11.996  -4.670 -25.431  1.00 90.35           C  
ATOM   1548  CB  LEU A 101     -12.772  -7.016 -24.829  1.00 90.35           C  
ATOM   1549  HB2 LEU A 101     -13.805  -6.741 -24.611  1.00 90.35           H  
ATOM   1550  HB3 LEU A 101     -12.695  -7.181 -25.904  1.00 90.35           H  
ATOM   1551  O   LEU A 101     -11.148  -4.510 -26.302  1.00 90.35           O  
ATOM   1552  CG  LEU A 101     -12.435  -8.337 -24.109  1.00 90.35           C  
ATOM   1553  HG  LEU A 101     -12.375  -8.169 -23.033  1.00 90.35           H  
ATOM   1554  CD1 LEU A 101     -13.538  -9.362 -24.372  1.00 90.35           C  
ATOM   1555 HD11 LEU A 101     -13.619  -9.558 -25.441  1.00 90.35           H  
ATOM   1556 HD12 LEU A 101     -13.308 -10.292 -23.852  1.00 90.35           H  
ATOM   1557 HD13 LEU A 101     -14.488  -8.979 -23.999  1.00 90.35           H  
ATOM   1558  CD2 LEU A 101     -11.106  -8.932 -24.578  1.00 90.35           C  
ATOM   1559 HD21 LEU A 101     -10.280  -8.269 -24.320  1.00 90.35           H  
ATOM   1560 HD22 LEU A 101     -10.937  -9.891 -24.088  1.00 90.35           H  
ATOM   1561 HD23 LEU A 101     -11.122  -9.081 -25.657  1.00 90.35           H  
ATOM   1562  N   LEU A 102     -12.997  -3.805 -25.253  1.00 89.37           N  
ATOM   1563  H   LEU A 102     -13.682  -4.018 -24.542  1.00 89.37           H  
ATOM   1564  CA  LEU A 102     -13.212  -2.613 -26.078  1.00 89.37           C  
ATOM   1565  HA  LEU A 102     -13.194  -2.922 -27.123  1.00 89.37           H  
ATOM   1566  C   LEU A 102     -12.086  -1.573 -25.905  1.00 89.37           C  
ATOM   1567  CB  LEU A 102     -14.627  -2.095 -25.754  1.00 89.37           C  
ATOM   1568  HB2 LEU A 102     -15.297  -2.952 -25.833  1.00 89.37           H  
ATOM   1569  HB3 LEU A 102     -14.665  -1.750 -24.721  1.00 89.37           H  
ATOM   1570  O   LEU A 102     -11.682  -0.939 -26.879  1.00 89.37           O  
ATOM   1571  CG  LEU A 102     -15.167  -0.998 -26.691  1.00 89.37           C  
ATOM   1572  HG  LEU A 102     -14.766  -1.134 -27.695  1.00 89.37           H  
ATOM   1573  CD1 LEU A 102     -16.693  -1.091 -26.757  1.00 89.37           C  
ATOM   1574 HD11 LEU A 102     -16.977  -2.045 -27.200  1.00 89.37           H  
ATOM   1575 HD12 LEU A 102     -17.122  -1.018 -25.758  1.00 89.37           H  
ATOM   1576 HD13 LEU A 102     -17.090  -0.291 -27.383  1.00 89.37           H  
ATOM   1577  CD2 LEU A 102     -14.838   0.407 -26.190  1.00 89.37           C  
ATOM   1578 HD21 LEU A 102     -15.281   0.567 -25.207  1.00 89.37           H  
ATOM   1579 HD22 LEU A 102     -15.242   1.139 -26.889  1.00 89.37           H  
ATOM   1580 HD23 LEU A 102     -13.758   0.540 -26.135  1.00 89.37           H  
ATOM   1581  N   VAL A 103     -11.515  -1.440 -24.700  1.00 87.76           N  
ATOM   1582  H   VAL A 103     -11.903  -1.968 -23.932  1.00 87.76           H  
ATOM   1583  CA  VAL A 103     -10.268  -0.679 -24.479  1.00 87.76           C  
ATOM   1584  HA  VAL A 103     -10.354   0.285 -24.981  1.00 87.76           H  
ATOM   1585  C   VAL A 103      -9.063  -1.388 -25.108  1.00 87.76           C  
ATOM   1586  CB  VAL A 103     -10.029  -0.419 -22.975  1.00 87.76           C  
ATOM   1587  HB  VAL A 103     -10.123  -1.354 -22.422  1.00 87.76           H  
ATOM   1588  O   VAL A 103      -8.251  -0.741 -25.767  1.00 87.76           O  
ATOM   1589  CG1 VAL A 103      -8.642   0.168 -22.680  1.00 87.76           C  
ATOM   1590 HG11 VAL A 103      -7.870  -0.574 -22.883  1.00 87.76           H  
ATOM   1591 HG12 VAL A 103      -8.568   0.443 -21.628  1.00 87.76           H  
ATOM   1592 HG13 VAL A 103      -8.463   1.041 -23.307  1.00 87.76           H  
ATOM   1593  CG2 VAL A 103     -11.062   0.574 -22.428  1.00 87.76           C  
ATOM   1594 HG21 VAL A 103     -10.861   0.786 -21.378  1.00 87.76           H  
ATOM   1595 HG22 VAL A 103     -11.029   1.497 -23.005  1.00 87.76           H  
ATOM   1596 HG23 VAL A 103     -12.061   0.145 -22.504  1.00 87.76           H  
ATOM   1597  N   PHE A 104      -8.940  -2.703 -24.925  1.00 88.54           N  
ATOM   1598  H   PHE A 104      -9.642  -3.178 -24.375  1.00 88.54           H  
ATOM   1599  CA  PHE A 104      -7.782  -3.483 -25.359  1.00 88.54           C  
ATOM   1600  HA  PHE A 104      -6.882  -3.004 -24.974  1.00 88.54           H  
ATOM   1601  C   PHE A 104      -7.640  -3.522 -26.886  1.00 88.54           C  
ATOM   1602  CB  PHE A 104      -7.865  -4.889 -24.752  1.00 88.54           C  
ATOM   1603  HB2 PHE A 104      -7.960  -4.802 -23.669  1.00 88.54           H  
ATOM   1604  HB3 PHE A 104      -8.762  -5.386 -25.123  1.00 88.54           H  
ATOM   1605  O   PHE A 104      -6.576  -3.189 -27.398  1.00 88.54           O  
ATOM   1606  CG  PHE A 104      -6.658  -5.753 -25.052  1.00 88.54           C  
ATOM   1607  CD1 PHE A 104      -6.735  -6.766 -26.027  1.00 88.54           C  
ATOM   1608  HD1 PHE A 104      -7.657  -6.938 -26.562  1.00 88.54           H  
ATOM   1609  CD2 PHE A 104      -5.447  -5.528 -24.371  1.00 88.54           C  
ATOM   1610  HD2 PHE A 104      -5.379  -4.746 -23.629  1.00 88.54           H  
ATOM   1611  CE1 PHE A 104      -5.605  -7.552 -26.316  1.00 88.54           C  
ATOM   1612  HE1 PHE A 104      -5.660  -8.325 -27.067  1.00 88.54           H  
ATOM   1613  CE2 PHE A 104      -4.316  -6.310 -24.665  1.00 88.54           C  
ATOM   1614  HE2 PHE A 104      -3.383  -6.131 -24.152  1.00 88.54           H  
ATOM   1615  CZ  PHE A 104      -4.395  -7.322 -25.637  1.00 88.54           C  
ATOM   1616  HZ  PHE A 104      -3.525  -7.919 -25.868  1.00 88.54           H  
ATOM   1617  N   SER A 105      -8.709  -3.824 -27.630  1.00 88.32           N  
ATOM   1618  H   SER A 105      -9.561  -4.112 -27.171  1.00 88.32           H  
ATOM   1619  CA  SER A 105      -8.691  -3.804 -29.100  1.00 88.32           C  
ATOM   1620  HA  SER A 105      -7.903  -4.470 -29.451  1.00 88.32           H  
ATOM   1621  C   SER A 105      -8.395  -2.411 -29.665  1.00 88.32           C  
ATOM   1622  CB  SER A 105     -10.027  -4.305 -29.656  1.00 88.32           C  
ATOM   1623  HB2 SER A 105     -10.838  -3.692 -29.260  1.00 88.32           H  
ATOM   1624  HB3 SER A 105     -10.024  -4.226 -30.743  1.00 88.32           H  
ATOM   1625  O   SER A 105      -7.704  -2.304 -30.675  1.00 88.32           O  
ATOM   1626  OG  SER A 105     -10.237  -5.654 -29.287  1.00 88.32           O  
ATOM   1627  HG  SER A 105      -9.647  -6.211 -29.800  1.00 88.32           H  
ATOM   1628  N   CYS A 106      -8.848  -1.344 -28.997  1.00 86.16           N  
ATOM   1629  H   CYS A 106      -9.406  -1.493 -28.168  1.00 86.16           H  
ATOM   1630  CA  CYS A 106      -8.506   0.030 -29.367  1.00 86.16           C  
ATOM   1631  HA  CYS A 106      -8.730   0.181 -30.423  1.00 86.16           H  
ATOM   1632  C   CYS A 106      -7.008   0.328 -29.170  1.00 86.16           C  
ATOM   1633  CB  CYS A 106      -9.378   0.980 -28.537  1.00 86.16           C  
ATOM   1634  HB2 CYS A 106      -9.117   0.890 -27.483  1.00 86.16           H  
ATOM   1635  HB3 CYS A 106     -10.430   0.723 -28.662  1.00 86.16           H  
ATOM   1636  O   CYS A 106      -6.393   0.955 -30.028  1.00 86.16           O  
ATOM   1637  SG  CYS A 106      -9.113   2.689 -29.082  1.00 86.16           S  
ATOM   1638  HG  CYS A 106      -7.842   2.570 -29.477  1.00 86.16           H  
ATOM   1639  N   LEU A 107      -6.408  -0.139 -28.069  1.00 86.56           N  
ATOM   1640  H   LEU A 107      -6.970  -0.634 -27.391  1.00 86.56           H  
ATOM   1641  CA  LEU A 107      -4.974   0.012 -27.798  1.00 86.56           C  
ATOM   1642  HA  LEU A 107      -4.703   1.056 -27.954  1.00 86.56           H  
ATOM   1643  C   LEU A 107      -4.133  -0.818 -28.782  1.00 86.56           C  
ATOM   1644  CB  LEU A 107      -4.741  -0.328 -26.311  1.00 86.56           C  
ATOM   1645  HB2 LEU A 107      -5.412   0.312 -25.739  1.00 86.56           H  
ATOM   1646  HB3 LEU A 107      -5.038  -1.359 -26.121  1.00 86.56           H  
ATOM   1647  O   LEU A 107      -3.170  -0.308 -29.346  1.00 86.56           O  
ATOM   1648  CG  LEU A 107      -3.311  -0.109 -25.774  1.00 86.56           C  
ATOM   1649  HG  LEU A 107      -2.927   0.845 -26.135  1.00 86.56           H  
ATOM   1650  CD1 LEU A 107      -3.358  -0.057 -24.243  1.00 86.56           C  
ATOM   1651 HD11 LEU A 107      -4.021   0.743 -23.915  1.00 86.56           H  
ATOM   1652 HD12 LEU A 107      -2.359   0.137 -23.851  1.00 86.56           H  
ATOM   1653 HD13 LEU A 107      -3.715  -1.010 -23.851  1.00 86.56           H  
ATOM   1654  CD2 LEU A 107      -2.338  -1.231 -26.151  1.00 86.56           C  
ATOM   1655 HD21 LEU A 107      -2.784  -2.205 -25.950  1.00 86.56           H  
ATOM   1656 HD22 LEU A 107      -1.413  -1.134 -25.581  1.00 86.56           H  
ATOM   1657 HD23 LEU A 107      -2.070  -1.165 -27.205  1.00 86.56           H  
ATOM   1658  N   VAL A 108      -4.529  -2.063 -29.058  1.00 88.18           N  
ATOM   1659  H   VAL A 108      -5.317  -2.432 -28.546  1.00 88.18           H  
ATOM   1660  CA  VAL A 108      -3.859  -2.939 -30.034  1.00 88.18           C  
ATOM   1661  HA  VAL A 108      -2.808  -3.025 -29.761  1.00 88.18           H  
ATOM   1662  C   VAL A 108      -3.888  -2.332 -31.443  1.00 88.18           C  
ATOM   1663  CB  VAL A 108      -4.481  -4.350 -29.986  1.00 88.18           C  
ATOM   1664  HB  VAL A 108      -5.567  -4.262 -30.022  1.00 88.18           H  
ATOM   1665  O   VAL A 108      -2.849  -2.265 -32.096  1.00 88.18           O  
ATOM   1666  CG1 VAL A 108      -4.041  -5.248 -31.145  1.00 88.18           C  
ATOM   1667 HG11 VAL A 108      -2.953  -5.282 -31.199  1.00 88.18           H  
ATOM   1668 HG12 VAL A 108      -4.426  -6.258 -31.004  1.00 88.18           H  
ATOM   1669 HG13 VAL A 108      -4.438  -4.864 -32.085  1.00 88.18           H  
ATOM   1670  CG2 VAL A 108      -4.086  -5.062 -28.685  1.00 88.18           C  
ATOM   1671 HG21 VAL A 108      -4.585  -6.030 -28.628  1.00 88.18           H  
ATOM   1672 HG22 VAL A 108      -3.007  -5.215 -28.655  1.00 88.18           H  
ATOM   1673 HG23 VAL A 108      -4.381  -4.473 -27.817  1.00 88.18           H  
ATOM   1674  N   LEU A 109      -5.031  -1.808 -31.899  1.00 86.94           N  
ATOM   1675  H   LEU A 109      -5.869  -1.887 -31.341  1.00 86.94           H  
ATOM   1676  CA  LEU A 109      -5.108  -1.115 -33.192  1.00 86.94           C  
ATOM   1677  HA  LEU A 109      -4.576  -1.719 -33.927  1.00 86.94           H  
ATOM   1678  C   LEU A 109      -4.380   0.237 -33.197  1.00 86.94           C  
ATOM   1679  CB  LEU A 109      -6.574  -1.003 -33.642  1.00 86.94           C  
ATOM   1680  HB2 LEU A 109      -7.184  -0.692 -32.793  1.00 86.94           H  
ATOM   1681  HB3 LEU A 109      -6.660  -0.234 -34.410  1.00 86.94           H  
ATOM   1682  O   LEU A 109      -3.875   0.632 -34.244  1.00 86.94           O  
ATOM   1683  CG  LEU A 109      -7.100  -2.333 -34.218  1.00 86.94           C  
ATOM   1684  HG  LEU A 109      -6.794  -3.160 -33.578  1.00 86.94           H  
ATOM   1685  CD1 LEU A 109      -8.623  -2.317 -34.272  1.00 86.94           C  
ATOM   1686 HD11 LEU A 109      -9.009  -2.234 -33.256  1.00 86.94           H  
ATOM   1687 HD12 LEU A 109      -8.990  -3.244 -34.713  1.00 86.94           H  
ATOM   1688 HD13 LEU A 109      -8.964  -1.470 -34.868  1.00 86.94           H  
ATOM   1689  CD2 LEU A 109      -6.584  -2.585 -35.639  1.00 86.94           C  
ATOM   1690 HD21 LEU A 109      -6.994  -3.520 -36.022  1.00 86.94           H  
ATOM   1691 HD22 LEU A 109      -6.884  -1.769 -36.297  1.00 86.94           H  
ATOM   1692 HD23 LEU A 109      -5.497  -2.663 -35.648  1.00 86.94           H  
ATOM   1693  N   SER A 110      -4.216   0.906 -32.049  1.00 82.91           N  
ATOM   1694  H   SER A 110      -4.701   0.590 -31.221  1.00 82.91           H  
ATOM   1695  CA  SER A 110      -3.305   2.054 -31.944  1.00 82.91           C  
ATOM   1696  HA  SER A 110      -3.589   2.787 -32.700  1.00 82.91           H  
ATOM   1697  C   SER A 110      -1.849   1.662 -32.210  1.00 82.91           C  
ATOM   1698  CB  SER A 110      -3.411   2.742 -30.581  1.00 82.91           C  
ATOM   1699  HB2 SER A 110      -4.446   3.032 -30.398  1.00 82.91           H  
ATOM   1700  HB3 SER A 110      -3.088   2.064 -29.791  1.00 82.91           H  
ATOM   1701  O   SER A 110      -1.144   2.438 -32.851  1.00 82.91           O  
ATOM   1702  OG  SER A 110      -2.584   3.891 -30.562  1.00 82.91           O  
ATOM   1703  HG  SER A 110      -1.758   3.695 -31.010  1.00 82.91           H  
ATOM   1704  N   VAL A 111      -1.398   0.481 -31.771  1.00 86.46           N  
ATOM   1705  H   VAL A 111      -2.022  -0.101 -31.231  1.00 86.46           H  
ATOM   1706  CA  VAL A 111      -0.035  -0.019 -32.044  1.00 86.46           C  
ATOM   1707  HA  VAL A 111       0.673   0.794 -31.881  1.00 86.46           H  
ATOM   1708  C   VAL A 111       0.121  -0.431 -33.511  1.00 86.46           C  
ATOM   1709  CB  VAL A 111       0.344  -1.163 -31.081  1.00 86.46           C  
ATOM   1710  HB  VAL A 111      -0.399  -1.957 -31.149  1.00 86.46           H  
ATOM   1711  O   VAL A 111       1.103  -0.055 -34.150  1.00 86.46           O  
ATOM   1712  CG1 VAL A 111       1.720  -1.764 -31.397  1.00 86.46           C  
ATOM   1713 HG11 VAL A 111       1.706  -2.251 -32.372  1.00 86.46           H  
ATOM   1714 HG12 VAL A 111       2.480  -0.983 -31.401  1.00 86.46           H  
ATOM   1715 HG13 VAL A 111       1.980  -2.516 -30.651  1.00 86.46           H  
ATOM   1716  CG2 VAL A 111       0.391  -0.660 -29.630  1.00 86.46           C  
ATOM   1717 HG21 VAL A 111       1.145   0.121 -29.532  1.00 86.46           H  
ATOM   1718 HG22 VAL A 111       0.639  -1.484 -28.962  1.00 86.46           H  
ATOM   1719 HG23 VAL A 111      -0.579  -0.259 -29.335  1.00 86.46           H  
ATOM   1720  N   PHE A 112      -0.871  -1.105 -34.104  1.00 88.07           N  
ATOM   1721  H   PHE A 112      -1.645  -1.440 -33.547  1.00 88.07           H  
ATOM   1722  CA  PHE A 112      -0.861  -1.354 -35.553  1.00 88.07           C  
ATOM   1723  HA  PHE A 112       0.092  -1.817 -35.809  1.00 88.07           H  
ATOM   1724  C   PHE A 112      -0.923  -0.049 -36.375  1.00 88.07           C  
ATOM   1725  CB  PHE A 112      -1.967  -2.343 -35.946  1.00 88.07           C  
ATOM   1726  HB2 PHE A 112      -2.928  -1.985 -35.577  1.00 88.07           H  
ATOM   1727  HB3 PHE A 112      -2.017  -2.366 -37.034  1.00 88.07           H  
ATOM   1728  O   PHE A 112      -0.314   0.026 -37.439  1.00 88.07           O  
ATOM   1729  CG  PHE A 112      -1.734  -3.780 -35.515  1.00 88.07           C  
ATOM   1730  CD1 PHE A 112      -0.690  -4.518 -36.105  1.00 88.07           C  
ATOM   1731  HD1 PHE A 112      -0.055  -4.057 -36.847  1.00 88.07           H  
ATOM   1732  CD2 PHE A 112      -2.587  -4.407 -34.586  1.00 88.07           C  
ATOM   1733  HD2 PHE A 112      -3.405  -3.855 -34.148  1.00 88.07           H  
ATOM   1734  CE1 PHE A 112      -0.481  -5.862 -35.751  1.00 88.07           C  
ATOM   1735  HE1 PHE A 112       0.320  -6.421 -36.212  1.00 88.07           H  
ATOM   1736  CE2 PHE A 112      -2.386  -5.757 -34.243  1.00 88.07           C  
ATOM   1737  HE2 PHE A 112      -3.048  -6.247 -33.544  1.00 88.07           H  
ATOM   1738  CZ  PHE A 112      -1.328  -6.482 -34.818  1.00 88.07           C  
ATOM   1739  HZ  PHE A 112      -1.175  -7.519 -34.558  1.00 88.07           H  
ATOM   1740  N   SER A 113      -1.523   1.029 -35.847  1.00 83.05           N  
ATOM   1741  H   SER A 113      -2.072   0.898 -35.009  1.00 83.05           H  
ATOM   1742  CA  SER A 113      -1.472   2.379 -36.444  1.00 83.05           C  
ATOM   1743  HA  SER A 113      -1.643   2.250 -37.512  1.00 83.05           H  
ATOM   1744  C   SER A 113      -0.108   3.088 -36.339  1.00 83.05           C  
ATOM   1745  CB  SER A 113      -2.620   3.266 -35.937  1.00 83.05           C  
ATOM   1746  HB2 SER A 113      -2.856   3.993 -36.714  1.00 83.05           H  
ATOM   1747  HB3 SER A 113      -3.511   2.660 -35.774  1.00 83.05           H  
ATOM   1748  O   SER A 113      -0.001   4.253 -36.709  1.00 83.05           O  
ATOM   1749  OG  SER A 113      -2.294   3.979 -34.751  1.00 83.05           O  
ATOM   1750  HG  SER A 113      -1.844   3.384 -34.147  1.00 83.05           H  
ATOM   1751  N   THR A 114       0.935   2.409 -35.846  1.00 84.40           N  
ATOM   1752  H   THR A 114       0.762   1.500 -35.440  1.00 84.40           H  
ATOM   1753  CA  THR A 114       2.341   2.850 -35.948  1.00 84.40           C  
ATOM   1754  HA  THR A 114       2.361   3.797 -36.487  1.00 84.40           H  
ATOM   1755  C   THR A 114       3.217   1.918 -36.796  1.00 84.40           C  
ATOM   1756  CB  THR A 114       2.975   3.129 -34.570  1.00 84.40           C  
ATOM   1757  HB  THR A 114       4.017   3.415 -34.714  1.00 84.40           H  
ATOM   1758  O   THR A 114       4.418   2.145 -36.912  1.00 84.40           O  
ATOM   1759  CG2 THR A 114       2.267   4.281 -33.855  1.00 84.40           C  
ATOM   1760 HG21 THR A 114       2.279   5.169 -34.487  1.00 84.40           H  
ATOM   1761 HG22 THR A 114       2.788   4.502 -32.923  1.00 84.40           H  
ATOM   1762 HG23 THR A 114       1.235   4.011 -33.632  1.00 84.40           H  
ATOM   1763  OG1 THR A 114       2.932   2.031 -33.685  1.00 84.40           O  
ATOM   1764  HG1 THR A 114       2.721   1.230 -34.169  1.00 84.40           H  
ATOM   1765  N   ILE A 115       2.632   0.885 -37.416  1.00 89.14           N  
ATOM   1766  H   ILE A 115       1.630   0.784 -37.341  1.00 89.14           H  
ATOM   1767  CA  ILE A 115       3.316  -0.051 -38.320  1.00 89.14           C  
ATOM   1768  HA  ILE A 115       4.392   0.114 -38.277  1.00 89.14           H  
ATOM   1769  C   ILE A 115       2.838   0.263 -39.743  1.00 89.14           C  
ATOM   1770  CB  ILE A 115       3.045  -1.513 -37.886  1.00 89.14           C  
ATOM   1771  HB  ILE A 115       1.973  -1.701 -37.945  1.00 89.14           H  
ATOM   1772  O   ILE A 115       1.660   0.084 -40.048  1.00 89.14           O  
ATOM   1773  CG1 ILE A 115       3.506  -1.757 -36.426  1.00 89.14           C  
ATOM   1774 HG12 ILE A 115       3.041  -1.021 -35.770  1.00 89.14           H  
ATOM   1775 HG13 ILE A 115       4.586  -1.623 -36.361  1.00 89.14           H  
ATOM   1776  CG2 ILE A 115       3.765  -2.479 -38.842  1.00 89.14           C  
ATOM   1777 HG21 ILE A 115       4.838  -2.290 -38.837  1.00 89.14           H  
ATOM   1778 HG22 ILE A 115       3.589  -3.517 -38.560  1.00 89.14           H  
ATOM   1779 HG23 ILE A 115       3.399  -2.348 -39.861  1.00 89.14           H  
ATOM   1780  CD1 ILE A 115       3.141  -3.136 -35.861  1.00 89.14           C  
ATOM   1781 HD11 ILE A 115       2.073  -3.315 -35.980  1.00 89.14           H  
ATOM   1782 HD12 ILE A 115       3.706  -3.921 -36.363  1.00 89.14           H  
ATOM   1783 HD13 ILE A 115       3.385  -3.162 -34.799  1.00 89.14           H  
ATOM   1784  N   LYS A 116       3.728   0.763 -40.611  1.00 88.32           N  
ATOM   1785  H   LYS A 116       4.702   0.720 -40.346  1.00 88.32           H  
ATOM   1786  CA  LYS A 116       3.394   1.362 -41.928  1.00 88.32           C  
ATOM   1787  HA  LYS A 116       2.820   2.277 -41.783  1.00 88.32           H  
ATOM   1788  C   LYS A 116       2.564   0.417 -42.802  1.00 88.32           C  
ATOM   1789  CB  LYS A 116       4.681   1.672 -42.716  1.00 88.32           C  
ATOM   1790  HB2 LYS A 116       5.068   0.726 -43.093  1.00 88.32           H  
ATOM   1791  HB3 LYS A 116       4.415   2.272 -43.586  1.00 88.32           H  
ATOM   1792  O   LYS A 116       1.648   0.830 -43.508  1.00 88.32           O  
ATOM   1793  CG  LYS A 116       5.820   2.378 -41.963  1.00 88.32           C  
ATOM   1794  HG2 LYS A 116       5.990   1.905 -40.996  1.00 88.32           H  
ATOM   1795  HG3 LYS A 116       5.575   3.429 -41.812  1.00 88.32           H  
ATOM   1796  CD  LYS A 116       7.102   2.237 -42.795  1.00 88.32           C  
ATOM   1797  HD2 LYS A 116       7.252   1.180 -43.015  1.00 88.32           H  
ATOM   1798  HD3 LYS A 116       6.992   2.777 -43.735  1.00 88.32           H  
ATOM   1799  CE  LYS A 116       8.325   2.750 -42.033  1.00 88.32           C  
ATOM   1800  HE2 LYS A 116       8.278   2.362 -41.015  1.00 88.32           H  
ATOM   1801  HE3 LYS A 116       8.290   3.838 -41.986  1.00 88.32           H  
ATOM   1802  NZ  LYS A 116       9.569   2.278 -42.688  1.00 88.32           N  
ATOM   1803  HZ1 LYS A 116      10.387   2.565 -42.169  1.00 88.32           H  
ATOM   1804  HZ2 LYS A 116       9.630   2.629 -43.634  1.00 88.32           H  
ATOM   1805  HZ3 LYS A 116       9.557   1.270 -42.736  1.00 88.32           H  
ATOM   1806  N   GLU A 117       2.902  -0.861 -42.707  1.00 88.79           N  
ATOM   1807  H   GLU A 117       3.685  -1.053 -42.098  1.00 88.79           H  
ATOM   1808  CA  GLU A 117       2.371  -2.001 -43.443  1.00 88.79           C  
ATOM   1809  HA  GLU A 117       2.426  -1.802 -44.514  1.00 88.79           H  
ATOM   1810  C   GLU A 117       0.893  -2.267 -43.096  1.00 88.79           C  
ATOM   1811  CB  GLU A 117       3.261  -3.222 -43.117  1.00 88.79           C  
ATOM   1812  HB2 GLU A 117       2.848  -4.083 -43.641  1.00 88.79           H  
ATOM   1813  HB3 GLU A 117       3.200  -3.436 -42.050  1.00 88.79           H  
ATOM   1814  O   GLU A 117       0.154  -2.814 -43.912  1.00 88.79           O  
ATOM   1815  CG  GLU A 117       4.752  -3.097 -43.527  1.00 88.79           C  
ATOM   1816  HG2 GLU A 117       4.788  -2.897 -44.598  1.00 88.79           H  
ATOM   1817  HG3 GLU A 117       5.225  -4.065 -43.362  1.00 88.79           H  
ATOM   1818  CD  GLU A 117       5.577  -2.023 -42.777  1.00 88.79           C  
ATOM   1819  OE1 GLU A 117       6.458  -1.392 -43.406  1.00 88.79           O  
ATOM   1820  OE2 GLU A 117       5.275  -1.744 -41.592  1.00 88.79           O  
ATOM   1821  N   TYR A 118       0.442  -1.813 -41.920  1.00 87.80           N  
ATOM   1822  H   TYR A 118       1.108  -1.354 -41.314  1.00 87.80           H  
ATOM   1823  CA  TYR A 118      -0.940  -1.913 -41.446  1.00 87.80           C  
ATOM   1824  HA  TYR A 118      -1.535  -2.426 -42.201  1.00 87.80           H  
ATOM   1825  C   TYR A 118      -1.615  -0.553 -41.210  1.00 87.80           C  
ATOM   1826  CB  TYR A 118      -0.977  -2.769 -40.170  1.00 87.80           C  
ATOM   1827  HB2 TYR A 118      -0.373  -2.288 -39.400  1.00 87.80           H  
ATOM   1828  HB3 TYR A 118      -2.001  -2.814 -39.802  1.00 87.80           H  
ATOM   1829  O   TYR A 118      -2.836  -0.524 -41.035  1.00 87.80           O  
ATOM   1830  CG  TYR A 118      -0.495  -4.191 -40.382  1.00 87.80           C  
ATOM   1831  CD1 TYR A 118      -1.344  -5.136 -40.991  1.00 87.80           C  
ATOM   1832  HD1 TYR A 118      -2.343  -4.853 -41.288  1.00 87.80           H  
ATOM   1833  CD2 TYR A 118       0.813  -4.555 -40.013  1.00 87.80           C  
ATOM   1834  HD2 TYR A 118       1.465  -3.821 -39.562  1.00 87.80           H  
ATOM   1835  CE1 TYR A 118      -0.881  -6.442 -41.235  1.00 87.80           C  
ATOM   1836  HE1 TYR A 118      -1.515  -7.173 -41.715  1.00 87.80           H  
ATOM   1837  CE2 TYR A 118       1.284  -5.858 -40.262  1.00 87.80           C  
ATOM   1838  HE2 TYR A 118       2.296  -6.128 -39.996  1.00 87.80           H  
ATOM   1839  OH  TYR A 118       0.879  -8.062 -41.132  1.00 87.80           O  
ATOM   1840  HH  TYR A 118       1.804  -8.171 -40.900  1.00 87.80           H  
ATOM   1841  CZ  TYR A 118       0.435  -6.804 -40.878  1.00 87.80           C  
ATOM   1842  N   GLU A 119      -0.879   0.566 -41.209  1.00 84.66           N  
ATOM   1843  H   GLU A 119       0.121   0.451 -41.290  1.00 84.66           H  
ATOM   1844  CA  GLU A 119      -1.349   1.886 -40.759  1.00 84.66           C  
ATOM   1845  HA  GLU A 119      -1.542   1.826 -39.688  1.00 84.66           H  
ATOM   1846  C   GLU A 119      -2.663   2.301 -41.435  1.00 84.66           C  
ATOM   1847  CB  GLU A 119      -0.246   2.945 -40.974  1.00 84.66           C  
ATOM   1848  HB2 GLU A 119      -0.052   3.044 -42.042  1.00 84.66           H  
ATOM   1849  HB3 GLU A 119       0.668   2.609 -40.486  1.00 84.66           H  
ATOM   1850  O   GLU A 119      -3.643   2.575 -40.749  1.00 84.66           O  
ATOM   1851  CG  GLU A 119      -0.631   4.317 -40.389  1.00 84.66           C  
ATOM   1852  HG2 GLU A 119      -1.555   4.657 -40.857  1.00 84.66           H  
ATOM   1853  HG3 GLU A 119      -0.826   4.196 -39.323  1.00 84.66           H  
ATOM   1854  CD  GLU A 119       0.446   5.391 -40.612  1.00 84.66           C  
ATOM   1855  OE1 GLU A 119       0.850   6.068 -39.631  1.00 84.66           O  
ATOM   1856  OE2 GLU A 119       0.819   5.614 -41.784  1.00 84.66           O  
ATOM   1857  N   LYS A 120      -2.734   2.242 -42.771  1.00 83.68           N  
ATOM   1858  H   LYS A 120      -1.889   1.978 -43.257  1.00 83.68           H  
ATOM   1859  CA  LYS A 120      -3.915   2.670 -43.552  1.00 83.68           C  
ATOM   1860  HA  LYS A 120      -4.135   3.708 -43.305  1.00 83.68           H  
ATOM   1861  C   LYS A 120      -5.195   1.886 -43.224  1.00 83.68           C  
ATOM   1862  CB  LYS A 120      -3.605   2.569 -45.055  1.00 83.68           C  
ATOM   1863  HB2 LYS A 120      -3.325   1.543 -45.295  1.00 83.68           H  
ATOM   1864  HB3 LYS A 120      -4.507   2.817 -45.616  1.00 83.68           H  
ATOM   1865  O   LYS A 120      -6.284   2.447 -43.279  1.00 83.68           O  
ATOM   1866  CG  LYS A 120      -2.481   3.523 -45.490  1.00 83.68           C  
ATOM   1867  HG2 LYS A 120      -2.788   4.551 -45.295  1.00 83.68           H  
ATOM   1868  HG3 LYS A 120      -1.579   3.313 -44.916  1.00 83.68           H  
ATOM   1869  CD  LYS A 120      -2.162   3.359 -46.981  1.00 83.68           C  
ATOM   1870  HD2 LYS A 120      -1.870   2.326 -47.169  1.00 83.68           H  
ATOM   1871  HD3 LYS A 120      -3.048   3.598 -47.570  1.00 83.68           H  
ATOM   1872  CE  LYS A 120      -1.011   4.298 -47.360  1.00 83.68           C  
ATOM   1873  HE2 LYS A 120      -0.174   4.103 -46.689  1.00 83.68           H  
ATOM   1874  HE3 LYS A 120      -1.331   5.326 -47.194  1.00 83.68           H  
ATOM   1875  NZ  LYS A 120      -0.586   4.108 -48.770  1.00 83.68           N  
ATOM   1876  HZ1 LYS A 120       0.173   4.736 -48.994  1.00 83.68           H  
ATOM   1877  HZ2 LYS A 120      -0.263   3.162 -48.913  1.00 83.68           H  
ATOM   1878  HZ3 LYS A 120      -1.353   4.290 -49.401  1.00 83.68           H  
ATOM   1879  N   SER A 121      -5.071   0.605 -42.873  1.00 86.88           N  
ATOM   1880  H   SER A 121      -4.134   0.242 -42.772  1.00 86.88           H  
ATOM   1881  CA  SER A 121      -6.201  -0.231 -42.432  1.00 86.88           C  
ATOM   1882  HA  SER A 121      -7.090   0.020 -43.009  1.00 86.88           H  
ATOM   1883  C   SER A 121      -6.519   0.006 -40.950  1.00 86.88           C  
ATOM   1884  CB  SER A 121      -5.858  -1.702 -42.695  1.00 86.88           C  
ATOM   1885  HB2 SER A 121      -5.556  -1.817 -43.736  1.00 86.88           H  
ATOM   1886  HB3 SER A 121      -5.033  -2.010 -42.053  1.00 86.88           H  
ATOM   1887  O   SER A 121      -7.677   0.139 -40.546  1.00 86.88           O  
ATOM   1888  OG  SER A 121      -6.979  -2.524 -42.454  1.00 86.88           O  
ATOM   1889  HG  SER A 121      -6.751  -3.433 -42.661  1.00 86.88           H  
ATOM   1890  N   SER A 122      -5.466   0.144 -40.141  1.00 85.37           N  
ATOM   1891  H   SER A 122      -4.546   0.086 -40.553  1.00 85.37           H  
ATOM   1892  CA  SER A 122      -5.547   0.349 -38.695  1.00 85.37           C  
ATOM   1893  HA  SER A 122      -6.155  -0.444 -38.260  1.00 85.37           H  
ATOM   1894  C   SER A 122      -6.187   1.682 -38.337  1.00 85.37           C  
ATOM   1895  CB  SER A 122      -4.158   0.286 -38.062  1.00 85.37           C  
ATOM   1896  HB2 SER A 122      -4.253   0.350 -36.978  1.00 85.37           H  
ATOM   1897  HB3 SER A 122      -3.547   1.117 -38.416  1.00 85.37           H  
ATOM   1898  O   SER A 122      -7.004   1.717 -37.429  1.00 85.37           O  
ATOM   1899  OG  SER A 122      -3.536  -0.930 -38.402  1.00 85.37           O  
ATOM   1900  HG  SER A 122      -3.254  -0.871 -39.317  1.00 85.37           H  
ATOM   1901  N   GLU A 123      -5.876   2.765 -39.052  1.00 82.10           N  
ATOM   1902  H   GLU A 123      -5.168   2.686 -39.768  1.00 82.10           H  
ATOM   1903  CA  GLU A 123      -6.475   4.085 -38.824  1.00 82.10           C  
ATOM   1904  HA  GLU A 123      -6.399   4.322 -37.763  1.00 82.10           H  
ATOM   1905  C   GLU A 123      -7.973   4.108 -39.159  1.00 82.10           C  
ATOM   1906  CB  GLU A 123      -5.708   5.172 -39.598  1.00 82.10           C  
ATOM   1907  HB2 GLU A 123      -5.603   4.883 -40.644  1.00 82.10           H  
ATOM   1908  HB3 GLU A 123      -6.286   6.094 -39.543  1.00 82.10           H  
ATOM   1909  O   GLU A 123      -8.746   4.705 -38.411  1.00 82.10           O  
ATOM   1910  CG  GLU A 123      -4.323   5.425 -38.976  1.00 82.10           C  
ATOM   1911  HG2 GLU A 123      -3.697   4.540 -39.096  1.00 82.10           H  
ATOM   1912  HG3 GLU A 123      -4.459   5.578 -37.905  1.00 82.10           H  
ATOM   1913  CD  GLU A 123      -3.584   6.651 -39.537  1.00 82.10           C  
ATOM   1914  OE1 GLU A 123      -2.501   6.955 -38.982  1.00 82.10           O  
ATOM   1915  OE2 GLU A 123      -4.129   7.391 -40.379  1.00 82.10           O  
ATOM   1916  N   GLY A 124      -8.415   3.392 -40.201  1.00 84.60           N  
ATOM   1917  H   GLY A 124      -7.737   2.910 -40.773  1.00 84.60           H  
ATOM   1918  CA  GLY A 124      -9.840   3.233 -40.513  1.00 84.60           C  
ATOM   1919  HA2 GLY A 124     -10.299   4.216 -40.623  1.00 84.60           H  
ATOM   1920  HA3 GLY A 124      -9.937   2.691 -41.454  1.00 84.60           H  
ATOM   1921  C   GLY A 124     -10.597   2.457 -39.429  1.00 84.60           C  
ATOM   1922  O   GLY A 124     -11.632   2.912 -38.937  1.00 84.60           O  
ATOM   1923  N   ALA A 125     -10.049   1.319 -38.991  1.00 87.98           N  
ATOM   1924  H   ALA A 125      -9.204   0.987 -39.432  1.00 87.98           H  
ATOM   1925  CA  ALA A 125     -10.617   0.534 -37.893  1.00 87.98           C  
ATOM   1926  HA  ALA A 125     -11.659   0.312 -38.126  1.00 87.98           H  
ATOM   1927  C   ALA A 125     -10.597   1.301 -36.554  1.00 87.98           C  
ATOM   1928  CB  ALA A 125      -9.847  -0.789 -37.804  1.00 87.98           C  
ATOM   1929  HB1 ALA A 125     -10.282  -1.415 -37.025  1.00 87.98           H  
ATOM   1930  HB2 ALA A 125      -9.905  -1.315 -38.757  1.00 87.98           H  
ATOM   1931  HB3 ALA A 125      -8.800  -0.597 -37.569  1.00 87.98           H  
ATOM   1932  O   ALA A 125     -11.573   1.270 -35.801  1.00 87.98           O  
ATOM   1933  N   LEU A 126      -9.513   2.032 -36.276  1.00 84.59           N  
ATOM   1934  H   LEU A 126      -8.739   1.990 -36.924  1.00 84.59           H  
ATOM   1935  CA  LEU A 126      -9.347   2.874 -35.093  1.00 84.59           C  
ATOM   1936  HA  LEU A 126      -9.570   2.270 -34.214  1.00 84.59           H  
ATOM   1937  C   LEU A 126     -10.335   4.038 -35.098  1.00 84.59           C  
ATOM   1938  CB  LEU A 126      -7.875   3.322 -34.995  1.00 84.59           C  
ATOM   1939  HB2 LEU A 126      -7.277   2.411 -34.972  1.00 84.59           H  
ATOM   1940  HB3 LEU A 126      -7.605   3.872 -35.897  1.00 84.59           H  
ATOM   1941  O   LEU A 126     -10.932   4.280 -34.062  1.00 84.59           O  
ATOM   1942  CG  LEU A 126      -7.490   4.168 -33.762  1.00 84.59           C  
ATOM   1943  HG  LEU A 126      -8.012   3.795 -32.881  1.00 84.59           H  
ATOM   1944  CD1 LEU A 126      -5.986   4.034 -33.520  1.00 84.59           C  
ATOM   1945 HD11 LEU A 126      -5.740   2.983 -33.367  1.00 84.59           H  
ATOM   1946 HD12 LEU A 126      -5.694   4.587 -32.628  1.00 84.59           H  
ATOM   1947 HD13 LEU A 126      -5.428   4.408 -34.378  1.00 84.59           H  
ATOM   1948  CD2 LEU A 126      -7.774   5.665 -33.930  1.00 84.59           C  
ATOM   1949 HD21 LEU A 126      -7.329   6.227 -33.109  1.00 84.59           H  
ATOM   1950 HD22 LEU A 126      -7.352   6.022 -34.870  1.00 84.59           H  
ATOM   1951 HD23 LEU A 126      -8.847   5.857 -33.923  1.00 84.59           H  
ATOM   1952  N   TYR A 127     -10.574   4.716 -36.223  1.00 84.19           N  
ATOM   1953  H   TYR A 127     -10.026   4.502 -37.044  1.00 84.19           H  
ATOM   1954  CA  TYR A 127     -11.555   5.807 -36.317  1.00 84.19           C  
ATOM   1955  HA  TYR A 127     -11.291   6.580 -35.595  1.00 84.19           H  
ATOM   1956  C   TYR A 127     -12.980   5.333 -35.983  1.00 84.19           C  
ATOM   1957  CB  TYR A 127     -11.476   6.414 -37.725  1.00 84.19           C  
ATOM   1958  HB2 TYR A 127     -11.658   5.631 -38.462  1.00 84.19           H  
ATOM   1959  HB3 TYR A 127     -10.463   6.780 -37.890  1.00 84.19           H  
ATOM   1960  O   TYR A 127     -13.684   5.964 -35.193  1.00 84.19           O  
ATOM   1961  CG  TYR A 127     -12.441   7.556 -37.980  1.00 84.19           C  
ATOM   1962  CD1 TYR A 127     -13.676   7.308 -38.611  1.00 84.19           C  
ATOM   1963  HD1 TYR A 127     -13.941   6.303 -38.906  1.00 84.19           H  
ATOM   1964  CD2 TYR A 127     -12.093   8.870 -37.609  1.00 84.19           C  
ATOM   1965  HD2 TYR A 127     -11.141   9.058 -37.134  1.00 84.19           H  
ATOM   1966  CE1 TYR A 127     -14.562   8.371 -38.867  1.00 84.19           C  
ATOM   1967  HE1 TYR A 127     -15.510   8.193 -39.353  1.00 84.19           H  
ATOM   1968  CE2 TYR A 127     -12.974   9.938 -37.870  1.00 84.19           C  
ATOM   1969  HE2 TYR A 127     -12.700  10.945 -37.594  1.00 84.19           H  
ATOM   1970  OH  TYR A 127     -15.078  10.706 -38.743  1.00 84.19           O  
ATOM   1971  HH  TYR A 127     -14.714  11.561 -38.501  1.00 84.19           H  
ATOM   1972  CZ  TYR A 127     -14.214   9.686 -38.496  1.00 84.19           C  
ATOM   1973  N   ILE A 128     -13.383   4.172 -36.512  1.00 88.67           N  
ATOM   1974  H   ILE A 128     -12.760   3.702 -37.153  1.00 88.67           H  
ATOM   1975  CA  ILE A 128     -14.686   3.557 -36.211  1.00 88.67           C  
ATOM   1976  HA  ILE A 128     -15.466   4.298 -36.387  1.00 88.67           H  
ATOM   1977  C   ILE A 128     -14.773   3.166 -34.726  1.00 88.67           C  
ATOM   1978  CB  ILE A 128     -14.935   2.361 -37.163  1.00 88.67           C  
ATOM   1979  HB  ILE A 128     -14.082   1.685 -37.095  1.00 88.67           H  
ATOM   1980  O   ILE A 128     -15.765   3.471 -34.058  1.00 88.67           O  
ATOM   1981  CG1 ILE A 128     -15.060   2.859 -38.624  1.00 88.67           C  
ATOM   1982 HG12 ILE A 128     -14.235   3.532 -38.856  1.00 88.67           H  
ATOM   1983 HG13 ILE A 128     -15.985   3.425 -38.737  1.00 88.67           H  
ATOM   1984  CG2 ILE A 128     -16.202   1.579 -36.760  1.00 88.67           C  
ATOM   1985 HG21 ILE A 128     -17.070   2.237 -36.785  1.00 88.67           H  
ATOM   1986 HG22 ILE A 128     -16.365   0.742 -37.439  1.00 88.67           H  
ATOM   1987 HG23 ILE A 128     -16.094   1.164 -35.757  1.00 88.67           H  
ATOM   1988  CD1 ILE A 128     -15.029   1.740 -39.673  1.00 88.67           C  
ATOM   1989 HD11 ILE A 128     -15.918   1.114 -39.600  1.00 88.67           H  
ATOM   1990 HD12 ILE A 128     -14.137   1.129 -39.536  1.00 88.67           H  
ATOM   1991 HD13 ILE A 128     -15.001   2.184 -40.668  1.00 88.67           H  
ATOM   1992  N   LEU A 129     -13.731   2.536 -34.174  1.00 87.29           N  
ATOM   1993  H   LEU A 129     -12.940   2.305 -34.758  1.00 87.29           H  
ATOM   1994  CA  LEU A 129     -13.691   2.169 -32.755  1.00 87.29           C  
ATOM   1995  HA  LEU A 129     -14.635   1.687 -32.503  1.00 87.29           H  
ATOM   1996  C   LEU A 129     -13.584   3.382 -31.822  1.00 87.29           C  
ATOM   1997  CB  LEU A 129     -12.545   1.178 -32.502  1.00 87.29           C  
ATOM   1998  HB2 LEU A 129     -11.635   1.580 -32.948  1.00 87.29           H  
ATOM   1999  HB3 LEU A 129     -12.378   1.103 -31.427  1.00 87.29           H  
ATOM   2000  O   LEU A 129     -14.152   3.345 -30.736  1.00 87.29           O  
ATOM   2001  CG  LEU A 129     -12.805  -0.237 -33.049  1.00 87.29           C  
ATOM   2002  HG  LEU A 129     -13.046  -0.191 -34.111  1.00 87.29           H  
ATOM   2003  CD1 LEU A 129     -11.538  -1.066 -32.869  1.00 87.29           C  
ATOM   2004 HD11 LEU A 129     -10.727  -0.580 -33.411  1.00 87.29           H  
ATOM   2005 HD12 LEU A 129     -11.685  -2.064 -33.281  1.00 87.29           H  
ATOM   2006 HD13 LEU A 129     -11.276  -1.136 -31.813  1.00 87.29           H  
ATOM   2007  CD2 LEU A 129     -13.943  -0.956 -32.316  1.00 87.29           C  
ATOM   2008 HD21 LEU A 129     -14.891  -0.455 -32.512  1.00 87.29           H  
ATOM   2009 HD22 LEU A 129     -14.020  -1.980 -32.682  1.00 87.29           H  
ATOM   2010 HD23 LEU A 129     -13.749  -0.968 -31.243  1.00 87.29           H  
ATOM   2011  N   GLU A 130     -12.930   4.467 -32.229  1.00 86.16           N  
ATOM   2012  H   GLU A 130     -12.439   4.415 -33.111  1.00 86.16           H  
ATOM   2013  CA  GLU A 130     -12.812   5.720 -31.480  1.00 86.16           C  
ATOM   2014  HA  GLU A 130     -12.369   5.505 -30.508  1.00 86.16           H  
ATOM   2015  C   GLU A 130     -14.202   6.322 -31.251  1.00 86.16           C  
ATOM   2016  CB  GLU A 130     -11.876   6.680 -32.243  1.00 86.16           C  
ATOM   2017  HB2 GLU A 130     -12.305   6.889 -33.223  1.00 86.16           H  
ATOM   2018  HB3 GLU A 130     -10.914   6.191 -32.398  1.00 86.16           H  
ATOM   2019  O   GLU A 130     -14.581   6.566 -30.102  1.00 86.16           O  
ATOM   2020  CG  GLU A 130     -11.610   8.026 -31.555  1.00 86.16           C  
ATOM   2021  HG2 GLU A 130     -11.032   8.648 -32.238  1.00 86.16           H  
ATOM   2022  HG3 GLU A 130     -12.561   8.526 -31.373  1.00 86.16           H  
ATOM   2023  CD  GLU A 130     -10.833   7.901 -30.242  1.00 86.16           C  
ATOM   2024  OE1 GLU A 130     -10.797   8.871 -29.460  1.00 86.16           O  
ATOM   2025  OE2 GLU A 130     -10.276   6.825 -29.919  1.00 86.16           O  
ATOM   2026  N   ILE A 131     -15.010   6.432 -32.314  1.00 89.42           N  
ATOM   2027  H   ILE A 131     -14.629   6.185 -33.217  1.00 89.42           H  
ATOM   2028  CA  ILE A 131     -16.423   6.839 -32.246  1.00 89.42           C  
ATOM   2029  HA  ILE A 131     -16.476   7.854 -31.852  1.00 89.42           H  
ATOM   2030  C   ILE A 131     -17.199   5.935 -31.275  1.00 89.42           C  
ATOM   2031  CB  ILE A 131     -17.049   6.830 -33.665  1.00 89.42           C  
ATOM   2032  HB  ILE A 131     -16.848   5.862 -34.124  1.00 89.42           H  
ATOM   2033  O   ILE A 131     -17.891   6.433 -30.383  1.00 89.42           O  
ATOM   2034  CG1 ILE A 131     -16.417   7.933 -34.544  1.00 89.42           C  
ATOM   2035 HG12 ILE A 131     -15.334   7.935 -34.416  1.00 89.42           H  
ATOM   2036 HG13 ILE A 131     -16.795   8.904 -34.224  1.00 89.42           H  
ATOM   2037  CG2 ILE A 131     -18.578   7.028 -33.606  1.00 89.42           C  
ATOM   2038 HG21 ILE A 131     -18.997   7.050 -34.612  1.00 89.42           H  
ATOM   2039 HG22 ILE A 131     -19.053   6.201 -33.079  1.00 89.42           H  
ATOM   2040 HG23 ILE A 131     -18.815   7.964 -33.101  1.00 89.42           H  
ATOM   2041  CD1 ILE A 131     -16.687   7.771 -36.044  1.00 89.42           C  
ATOM   2042 HD11 ILE A 131     -17.753   7.848 -36.261  1.00 89.42           H  
ATOM   2043 HD12 ILE A 131     -16.312   6.806 -36.387  1.00 89.42           H  
ATOM   2044 HD13 ILE A 131     -16.170   8.565 -36.582  1.00 89.42           H  
ATOM   2045  N   VAL A 132     -17.049   4.611 -31.389  1.00 91.31           N  
ATOM   2046  H   VAL A 132     -16.470   4.260 -32.139  1.00 91.31           H  
ATOM   2047  CA  VAL A 132     -17.717   3.653 -30.492  1.00 91.31           C  
ATOM   2048  HA  VAL A 132     -18.784   3.878 -30.496  1.00 91.31           H  
ATOM   2049  C   VAL A 132     -17.253   3.816 -29.037  1.00 91.31           C  
ATOM   2050  CB  VAL A 132     -17.548   2.207 -31.005  1.00 91.31           C  
ATOM   2051  HB  VAL A 132     -16.491   2.006 -31.178  1.00 91.31           H  
ATOM   2052  O   VAL A 132     -18.092   3.786 -28.137  1.00 91.31           O  
ATOM   2053  CG1 VAL A 132     -18.080   1.159 -30.019  1.00 91.31           C  
ATOM   2054 HG11 VAL A 132     -17.487   1.178 -29.104  1.00 91.31           H  
ATOM   2055 HG12 VAL A 132     -17.996   0.164 -30.457  1.00 91.31           H  
ATOM   2056 HG13 VAL A 132     -19.124   1.362 -29.780  1.00 91.31           H  
ATOM   2057  CG2 VAL A 132     -18.316   2.010 -32.319  1.00 91.31           C  
ATOM   2058 HG21 VAL A 132     -19.386   2.140 -32.156  1.00 91.31           H  
ATOM   2059 HG22 VAL A 132     -18.129   1.011 -32.711  1.00 91.31           H  
ATOM   2060 HG23 VAL A 132     -17.986   2.732 -33.066  1.00 91.31           H  
ATOM   2061  N   THR A 133     -15.964   4.058 -28.772  1.00 88.53           N  
ATOM   2062  H   THR A 133     -15.311   4.059 -29.542  1.00 88.53           H  
ATOM   2063  CA  THR A 133     -15.458   4.296 -27.407  1.00 88.53           C  
ATOM   2064  HA  THR A 133     -15.794   3.474 -26.776  1.00 88.53           H  
ATOM   2065  C   THR A 133     -16.043   5.573 -26.809  1.00 88.53           C  
ATOM   2066  CB  THR A 133     -13.921   4.348 -27.305  1.00 88.53           C  
ATOM   2067  HB  THR A 133     -13.691   4.423 -26.242  1.00 88.53           H  
ATOM   2068  O   THR A 133     -16.459   5.566 -25.652  1.00 88.53           O  
ATOM   2069  CG2 THR A 133     -13.179   3.109 -27.816  1.00 88.53           C  
ATOM   2070 HG21 THR A 133     -13.848   2.452 -28.372  1.00 88.53           H  
ATOM   2071 HG22 THR A 133     -12.352   3.395 -28.465  1.00 88.53           H  
ATOM   2072 HG23 THR A 133     -12.779   2.554 -26.968  1.00 88.53           H  
ATOM   2073  OG1 THR A 133     -13.357   5.502 -27.877  1.00 88.53           O  
ATOM   2074  HG1 THR A 133     -13.747   5.664 -28.740  1.00 88.53           H  
ATOM   2075  N   ILE A 134     -16.156   6.647 -27.594  1.00 90.95           N  
ATOM   2076  H   ILE A 134     -15.790   6.585 -28.534  1.00 90.95           H  
ATOM   2077  CA  ILE A 134     -16.719   7.932 -27.164  1.00 90.95           C  
ATOM   2078  HA  ILE A 134     -16.220   8.243 -26.246  1.00 90.95           H  
ATOM   2079  C   ILE A 134     -18.207   7.784 -26.836  1.00 90.95           C  
ATOM   2080  CB  ILE A 134     -16.440   8.993 -28.250  1.00 90.95           C  
ATOM   2081  HB  ILE A 134     -16.701   8.568 -29.220  1.00 90.95           H  
ATOM   2082  O   ILE A 134     -18.651   8.254 -25.787  1.00 90.95           O  
ATOM   2083  CG1 ILE A 134     -14.935   9.338 -28.239  1.00 90.95           C  
ATOM   2084 HG12 ILE A 134     -14.717   9.982 -27.387  1.00 90.95           H  
ATOM   2085 HG13 ILE A 134     -14.341   8.431 -28.133  1.00 90.95           H  
ATOM   2086  CG2 ILE A 134     -17.272  10.275 -28.056  1.00 90.95           C  
ATOM   2087 HG21 ILE A 134     -17.033  10.996 -28.838  1.00 90.95           H  
ATOM   2088 HG22 ILE A 134     -17.064  10.717 -27.082  1.00 90.95           H  
ATOM   2089 HG23 ILE A 134     -18.337  10.055 -28.136  1.00 90.95           H  
ATOM   2090  CD1 ILE A 134     -14.477  10.023 -29.526  1.00 90.95           C  
ATOM   2091 HD11 ILE A 134     -13.389  10.095 -29.539  1.00 90.95           H  
ATOM   2092 HD12 ILE A 134     -14.899  11.025 -29.606  1.00 90.95           H  
ATOM   2093 HD13 ILE A 134     -14.788   9.415 -30.376  1.00 90.95           H  
ATOM   2094  N   VAL A 135     -18.970   7.072 -27.672  1.00 93.25           N  
ATOM   2095  H   VAL A 135     -18.551   6.731 -28.525  1.00 93.25           H  
ATOM   2096  CA  VAL A 135     -20.388   6.783 -27.413  1.00 93.25           C  
ATOM   2097  HA  VAL A 135     -20.895   7.725 -27.201  1.00 93.25           H  
ATOM   2098  C   VAL A 135     -20.547   5.909 -26.165  1.00 93.25           C  
ATOM   2099  CB  VAL A 135     -21.059   6.160 -28.655  1.00 93.25           C  
ATOM   2100  HB  VAL A 135     -20.470   5.308 -28.994  1.00 93.25           H  
ATOM   2101  O   VAL A 135     -21.282   6.283 -25.251  1.00 93.25           O  
ATOM   2102  CG1 VAL A 135     -22.490   5.678 -28.372  1.00 93.25           C  
ATOM   2103 HG11 VAL A 135     -22.479   4.853 -27.660  1.00 93.25           H  
ATOM   2104 HG12 VAL A 135     -22.945   5.319 -29.295  1.00 93.25           H  
ATOM   2105 HG13 VAL A 135     -23.088   6.496 -27.971  1.00 93.25           H  
ATOM   2106  CG2 VAL A 135     -21.150   7.189 -29.791  1.00 93.25           C  
ATOM   2107 HG21 VAL A 135     -21.564   6.719 -30.683  1.00 93.25           H  
ATOM   2108 HG22 VAL A 135     -21.784   8.024 -29.495  1.00 93.25           H  
ATOM   2109 HG23 VAL A 135     -20.160   7.571 -30.041  1.00 93.25           H  
ATOM   2110  N   VAL A 136     -19.838   4.780 -26.070  1.00 92.28           N  
ATOM   2111  H   VAL A 136     -19.219   4.538 -26.830  1.00 92.28           H  
ATOM   2112  CA  VAL A 136     -19.975   3.831 -24.949  1.00 92.28           C  
ATOM   2113  HA  VAL A 136     -21.034   3.605 -24.825  1.00 92.28           H  
ATOM   2114  C   VAL A 136     -19.509   4.443 -23.625  1.00 92.28           C  
ATOM   2115  CB  VAL A 136     -19.247   2.503 -25.261  1.00 92.28           C  
ATOM   2116  HB  VAL A 136     -18.223   2.718 -25.568  1.00 92.28           H  
ATOM   2117  O   VAL A 136     -20.216   4.334 -22.622  1.00 92.28           O  
ATOM   2118  CG1 VAL A 136     -19.195   1.547 -24.059  1.00 92.28           C  
ATOM   2119 HG11 VAL A 136     -18.587   1.974 -23.262  1.00 92.28           H  
ATOM   2120 HG12 VAL A 136     -20.203   1.358 -23.688  1.00 92.28           H  
ATOM   2121 HG13 VAL A 136     -18.738   0.605 -24.362  1.00 92.28           H  
ATOM   2122  CG2 VAL A 136     -19.968   1.750 -26.389  1.00 92.28           C  
ATOM   2123 HG21 VAL A 136     -19.409   0.852 -26.651  1.00 92.28           H  
ATOM   2124 HG22 VAL A 136     -20.041   2.374 -27.280  1.00 92.28           H  
ATOM   2125 HG23 VAL A 136     -20.974   1.469 -26.076  1.00 92.28           H  
ATOM   2126  N   PHE A 137     -18.358   5.120 -23.593  1.00 90.73           N  
ATOM   2127  H   PHE A 137     -17.813   5.198 -24.440  1.00 90.73           H  
ATOM   2128  CA  PHE A 137     -17.816   5.718 -22.368  1.00 90.73           C  
ATOM   2129  HA  PHE A 137     -17.995   5.034 -21.538  1.00 90.73           H  
ATOM   2130  C   PHE A 137     -18.516   7.022 -21.984  1.00 90.73           C  
ATOM   2131  CB  PHE A 137     -16.300   5.920 -22.495  1.00 90.73           C  
ATOM   2132  HB2 PHE A 137     -16.120   6.642 -23.291  1.00 90.73           H  
ATOM   2133  HB3 PHE A 137     -15.934   6.374 -21.574  1.00 90.73           H  
ATOM   2134  O   PHE A 137     -18.687   7.272 -20.792  1.00 90.73           O  
ATOM   2135  CG  PHE A 137     -15.468   4.673 -22.771  1.00 90.73           C  
ATOM   2136  CD1 PHE A 137     -15.920   3.382 -22.421  1.00 90.73           C  
ATOM   2137  HD1 PHE A 137     -16.866   3.242 -21.918  1.00 90.73           H  
ATOM   2138  CD2 PHE A 137     -14.229   4.813 -23.426  1.00 90.73           C  
ATOM   2139  HD2 PHE A 137     -13.885   5.793 -23.722  1.00 90.73           H  
ATOM   2140  CE1 PHE A 137     -15.169   2.249 -22.773  1.00 90.73           C  
ATOM   2141  HE1 PHE A 137     -15.549   1.260 -22.561  1.00 90.73           H  
ATOM   2142  CE2 PHE A 137     -13.466   3.679 -23.751  1.00 90.73           C  
ATOM   2143  HE2 PHE A 137     -12.536   3.791 -24.290  1.00 90.73           H  
ATOM   2144  CZ  PHE A 137     -13.944   2.397 -23.443  1.00 90.73           C  
ATOM   2145  HZ  PHE A 137     -13.388   1.524 -23.749  1.00 90.73           H  
ATOM   2146  N   GLY A 138     -18.988   7.813 -22.953  1.00 92.70           N  
ATOM   2147  H   GLY A 138     -18.789   7.586 -23.917  1.00 92.70           H  
ATOM   2148  CA  GLY A 138     -19.842   8.973 -22.698  1.00 92.70           C  
ATOM   2149  HA2 GLY A 138     -20.031   9.489 -23.639  1.00 92.70           H  
ATOM   2150  HA3 GLY A 138     -19.340   9.652 -22.009  1.00 92.70           H  
ATOM   2151  C   GLY A 138     -21.177   8.568 -22.080  1.00 92.70           C  
ATOM   2152  O   GLY A 138     -21.555   9.090 -21.028  1.00 92.70           O  
ATOM   2153  N   VAL A 139     -21.856   7.572 -22.662  1.00 93.91           N  
ATOM   2154  H   VAL A 139     -21.500   7.177 -23.520  1.00 93.91           H  
ATOM   2155  CA  VAL A 139     -23.078   6.996 -22.083  1.00 93.91           C  
ATOM   2156  HA  VAL A 139     -23.794   7.805 -21.931  1.00 93.91           H  
ATOM   2157  C   VAL A 139     -22.798   6.405 -20.700  1.00 93.91           C  
ATOM   2158  CB  VAL A 139     -23.729   5.975 -23.041  1.00 93.91           C  
ATOM   2159  HB  VAL A 139     -22.976   5.262 -23.376  1.00 93.91           H  
ATOM   2160  O   VAL A 139     -23.550   6.700 -19.773  1.00 93.91           O  
ATOM   2161  CG1 VAL A 139     -24.876   5.191 -22.386  1.00 93.91           C  
ATOM   2162 HG11 VAL A 139     -25.351   4.550 -23.129  1.00 93.91           H  
ATOM   2163 HG12 VAL A 139     -25.617   5.879 -21.978  1.00 93.91           H  
ATOM   2164 HG13 VAL A 139     -24.491   4.554 -21.590  1.00 93.91           H  
ATOM   2165  CG2 VAL A 139     -24.328   6.698 -24.257  1.00 93.91           C  
ATOM   2166 HG21 VAL A 139     -25.141   7.354 -23.948  1.00 93.91           H  
ATOM   2167 HG22 VAL A 139     -23.567   7.296 -24.758  1.00 93.91           H  
ATOM   2168 HG23 VAL A 139     -24.704   5.966 -24.971  1.00 93.91           H  
ATOM   2169  N   GLU A 140     -21.711   5.651 -20.497  1.00 92.47           N  
ATOM   2170  H   GLU A 140     -21.132   5.397 -21.285  1.00 92.47           H  
ATOM   2171  CA  GLU A 140     -21.380   5.111 -19.170  1.00 92.47           C  
ATOM   2172  HA  GLU A 140     -22.255   4.564 -18.820  1.00 92.47           H  
ATOM   2173  C   GLU A 140     -21.106   6.222 -18.143  1.00 92.47           C  
ATOM   2174  CB  GLU A 140     -20.206   4.114 -19.235  1.00 92.47           C  
ATOM   2175  HB2 GLU A 140     -20.354   3.455 -20.091  1.00 92.47           H  
ATOM   2176  HB3 GLU A 140     -19.280   4.667 -19.393  1.00 92.47           H  
ATOM   2177  O   GLU A 140     -21.642   6.160 -17.040  1.00 92.47           O  
ATOM   2178  CG  GLU A 140     -20.129   3.226 -17.969  1.00 92.47           C  
ATOM   2179  HG2 GLU A 140     -20.939   3.492 -17.290  1.00 92.47           H  
ATOM   2180  HG3 GLU A 140     -20.307   2.189 -18.256  1.00 92.47           H  
ATOM   2181  CD  GLU A 140     -18.805   3.285 -17.193  1.00 92.47           C  
ATOM   2182  OE1 GLU A 140     -18.832   3.144 -15.946  1.00 92.47           O  
ATOM   2183  OE2 GLU A 140     -17.729   3.588 -17.764  1.00 92.47           O  
ATOM   2184  N   TYR A 141     -20.352   7.271 -18.487  1.00 91.68           N  
ATOM   2185  H   TYR A 141     -19.939   7.282 -19.408  1.00 91.68           H  
ATOM   2186  CA  TYR A 141     -20.074   8.412 -17.603  1.00 91.68           C  
ATOM   2187  HA  TYR A 141     -19.593   8.043 -16.697  1.00 91.68           H  
ATOM   2188  C   TYR A 141     -21.361   9.140 -17.184  1.00 91.68           C  
ATOM   2189  CB  TYR A 141     -19.097   9.366 -18.309  1.00 91.68           C  
ATOM   2190  HB2 TYR A 141     -18.153   8.844 -18.465  1.00 91.68           H  
ATOM   2191  HB3 TYR A 141     -19.491   9.611 -19.295  1.00 91.68           H  
ATOM   2192  O   TYR A 141     -21.610   9.335 -15.985  1.00 91.68           O  
ATOM   2193  CG  TYR A 141     -18.812  10.660 -17.564  1.00 91.68           C  
ATOM   2194  CD1 TYR A 141     -19.338  11.878 -18.037  1.00 91.68           C  
ATOM   2195  HD1 TYR A 141     -19.950  11.889 -18.928  1.00 91.68           H  
ATOM   2196  CD2 TYR A 141     -17.997  10.650 -16.416  1.00 91.68           C  
ATOM   2197  HD2 TYR A 141     -17.582   9.716 -16.067  1.00 91.68           H  
ATOM   2198  CE1 TYR A 141     -19.042  13.083 -17.371  1.00 91.68           C  
ATOM   2199  HE1 TYR A 141     -19.433  14.014 -17.754  1.00 91.68           H  
ATOM   2200  CE2 TYR A 141     -17.686  11.852 -15.753  1.00 91.68           C  
ATOM   2201  HE2 TYR A 141     -17.020  11.858 -14.903  1.00 91.68           H  
ATOM   2202  OH  TYR A 141     -17.917  14.234 -15.590  1.00 91.68           O  
ATOM   2203  HH  TYR A 141     -18.218  14.987 -16.104  1.00 91.68           H  
ATOM   2204  CZ  TYR A 141     -18.211  13.071 -16.229  1.00 91.68           C  
ATOM   2205  N   PHE A 142     -22.226   9.480 -18.148  1.00 92.46           N  
ATOM   2206  H   PHE A 142     -21.979   9.288 -19.108  1.00 92.46           H  
ATOM   2207  CA  PHE A 142     -23.510  10.123 -17.866  1.00 92.46           C  
ATOM   2208  HA  PHE A 142     -23.321  10.994 -17.238  1.00 92.46           H  
ATOM   2209  C   PHE A 142     -24.448   9.209 -17.066  1.00 92.46           C  
ATOM   2210  CB  PHE A 142     -24.173  10.601 -19.169  1.00 92.46           C  
ATOM   2211  HB2 PHE A 142     -25.183  10.939 -18.936  1.00 92.46           H  
ATOM   2212  HB3 PHE A 142     -24.265   9.750 -19.844  1.00 92.46           H  
ATOM   2213  O   PHE A 142     -25.059   9.670 -16.099  1.00 92.46           O  
ATOM   2214  CG  PHE A 142     -23.470  11.744 -19.888  1.00 92.46           C  
ATOM   2215  CD1 PHE A 142     -23.133  12.928 -19.201  1.00 92.46           C  
ATOM   2216  HD1 PHE A 142     -23.362  13.033 -18.151  1.00 92.46           H  
ATOM   2217  CD2 PHE A 142     -23.189  11.644 -21.265  1.00 92.46           C  
ATOM   2218  HD2 PHE A 142     -23.451  10.749 -21.810  1.00 92.46           H  
ATOM   2219  CE1 PHE A 142     -22.499  13.987 -19.878  1.00 92.46           C  
ATOM   2220  HE1 PHE A 142     -22.238  14.893 -19.352  1.00 92.46           H  
ATOM   2221  CE2 PHE A 142     -22.552  12.699 -21.941  1.00 92.46           C  
ATOM   2222  HE2 PHE A 142     -22.330  12.609 -22.994  1.00 92.46           H  
ATOM   2223  CZ  PHE A 142     -22.205  13.870 -21.247  1.00 92.46           C  
ATOM   2224  HZ  PHE A 142     -21.717  14.679 -21.771  1.00 92.46           H  
ATOM   2225  N   VAL A 143     -24.524   7.911 -17.386  1.00 92.85           N  
ATOM   2226  H   VAL A 143     -24.006   7.586 -18.190  1.00 92.85           H  
ATOM   2227  CA  VAL A 143     -25.339   6.933 -16.645  1.00 92.85           C  
ATOM   2228  HA  VAL A 143     -26.340   7.349 -16.532  1.00 92.85           H  
ATOM   2229  C   VAL A 143     -24.799   6.706 -15.231  1.00 92.85           C  
ATOM   2230  CB  VAL A 143     -25.490   5.609 -17.425  1.00 92.85           C  
ATOM   2231  HB  VAL A 143     -24.509   5.266 -17.753  1.00 92.85           H  
ATOM   2232  O   VAL A 143     -25.596   6.646 -14.297  1.00 92.85           O  
ATOM   2233  CG1 VAL A 143     -26.135   4.491 -16.590  1.00 92.85           C  
ATOM   2234 HG11 VAL A 143     -26.295   3.614 -17.217  1.00 92.85           H  
ATOM   2235 HG12 VAL A 143     -25.475   4.200 -15.773  1.00 92.85           H  
ATOM   2236 HG13 VAL A 143     -27.090   4.828 -16.187  1.00 92.85           H  
ATOM   2237  CG2 VAL A 143     -26.401   5.819 -18.644  1.00 92.85           C  
ATOM   2238 HG21 VAL A 143     -27.416   6.059 -18.327  1.00 92.85           H  
ATOM   2239 HG22 VAL A 143     -26.028   6.632 -19.266  1.00 92.85           H  
ATOM   2240 HG23 VAL A 143     -26.418   4.912 -19.250  1.00 92.85           H  
ATOM   2241  N   ARG A 144     -23.478   6.663 -15.014  1.00 91.13           N  
ATOM   2242  H   ARG A 144     -22.866   6.683 -15.818  1.00 91.13           H  
ATOM   2243  CA  ARG A 144     -22.874   6.497 -13.679  1.00 91.13           C  
ATOM   2244  HA  ARG A 144     -23.335   5.624 -13.216  1.00 91.13           H  
ATOM   2245  C   ARG A 144     -23.182   7.695 -12.782  1.00 91.13           C  
ATOM   2246  CB  ARG A 144     -21.359   6.239 -13.810  1.00 91.13           C  
ATOM   2247  HB2 ARG A 144     -21.172   5.663 -14.715  1.00 91.13           H  
ATOM   2248  HB3 ARG A 144     -20.828   7.187 -13.893  1.00 91.13           H  
ATOM   2249  O   ARG A 144     -23.627   7.510 -11.651  1.00 91.13           O  
ATOM   2250  CG  ARG A 144     -20.797   5.410 -12.644  1.00 91.13           C  
ATOM   2251  HG2 ARG A 144     -21.126   5.839 -11.697  1.00 91.13           H  
ATOM   2252  HG3 ARG A 144     -21.196   4.398 -12.712  1.00 91.13           H  
ATOM   2253  CD  ARG A 144     -19.261   5.330 -12.628  1.00 91.13           C  
ATOM   2254  HD2 ARG A 144     -18.967   4.529 -11.950  1.00 91.13           H  
ATOM   2255  HD3 ARG A 144     -18.871   6.260 -12.213  1.00 91.13           H  
ATOM   2256  NE  ARG A 144     -18.660   5.079 -13.955  1.00 91.13           N  
ATOM   2257  HE  ARG A 144     -18.857   4.209 -14.428  1.00 91.13           H  
ATOM   2258  NH1 ARG A 144     -17.554   7.086 -14.292  1.00 91.13           N  
ATOM   2259 HH11 ARG A 144     -17.923   7.515 -13.455  1.00 91.13           H  
ATOM   2260 HH12 ARG A 144     -16.988   7.582 -14.965  1.00 91.13           H  
ATOM   2261  NH2 ARG A 144     -17.305   5.480 -15.735  1.00 91.13           N  
ATOM   2262 HH21 ARG A 144     -17.546   4.582 -16.129  1.00 91.13           H  
ATOM   2263 HH22 ARG A 144     -16.794   6.159 -16.282  1.00 91.13           H  
ATOM   2264  CZ  ARG A 144     -17.864   5.875 -14.644  1.00 91.13           C  
ATOM   2265  N   ILE A 145     -23.042   8.920 -13.300  1.00 91.77           N  
ATOM   2266  H   ILE A 145     -22.668   8.988 -14.235  1.00 91.77           H  
ATOM   2267  CA  ILE A 145     -23.423  10.161 -12.596  1.00 91.77           C  
ATOM   2268  HA  ILE A 145     -22.984  10.137 -11.599  1.00 91.77           H  
ATOM   2269  C   ILE A 145     -24.946  10.250 -12.393  1.00 91.77           C  
ATOM   2270  CB  ILE A 145     -22.841  11.384 -13.350  1.00 91.77           C  
ATOM   2271  HB  ILE A 145     -23.028  11.261 -14.417  1.00 91.77           H  
ATOM   2272  O   ILE A 145     -25.416  10.724 -11.350  1.00 91.77           O  
ATOM   2273  CG1 ILE A 145     -21.316  11.425 -13.105  1.00 91.77           C  
ATOM   2274 HG12 ILE A 145     -21.133  11.613 -12.047  1.00 91.77           H  
ATOM   2275 HG13 ILE A 145     -20.882  10.457 -13.356  1.00 91.77           H  
ATOM   2276  CG2 ILE A 145     -23.489  12.710 -12.903  1.00 91.77           C  
ATOM   2277 HG21 ILE A 145     -23.336  12.856 -11.834  1.00 91.77           H  
ATOM   2278 HG22 ILE A 145     -23.054  13.546 -13.451  1.00 91.77           H  
ATOM   2279 HG23 ILE A 145     -24.554  12.706 -13.136  1.00 91.77           H  
ATOM   2280  CD1 ILE A 145     -20.563  12.481 -13.917  1.00 91.77           C  
ATOM   2281 HD11 ILE A 145     -20.754  12.332 -14.980  1.00 91.77           H  
ATOM   2282 HD12 ILE A 145     -19.496  12.375 -13.722  1.00 91.77           H  
ATOM   2283 HD13 ILE A 145     -20.862  13.488 -13.626  1.00 91.77           H  
ATOM   2284  N   TRP A 146     -25.745   9.773 -13.350  1.00 91.71           N  
ATOM   2285  H   TRP A 146     -25.334   9.463 -14.219  1.00 91.71           H  
ATOM   2286  CA  TRP A 146     -27.197   9.703 -13.208  1.00 91.71           C  
ATOM   2287  HA  TRP A 146     -27.546  10.704 -12.956  1.00 91.71           H  
ATOM   2288  C   TRP A 146     -27.604   8.742 -12.079  1.00 91.71           C  
ATOM   2289  CB  TRP A 146     -27.849   9.331 -14.545  1.00 91.71           C  
ATOM   2290  HB2 TRP A 146     -27.454   8.373 -14.883  1.00 91.71           H  
ATOM   2291  HB3 TRP A 146     -27.579  10.079 -15.290  1.00 91.71           H  
ATOM   2292  O   TRP A 146     -28.376   9.127 -11.187  1.00 91.71           O  
ATOM   2293  CG  TRP A 146     -29.341   9.220 -14.500  1.00 91.71           C  
ATOM   2294  CD1 TRP A 146     -30.218  10.197 -14.821  1.00 91.71           C  
ATOM   2295  HD1 TRP A 146     -29.942  11.174 -15.189  1.00 91.71           H  
ATOM   2296  CD2 TRP A 146     -30.150   8.044 -14.178  1.00 91.71           C  
ATOM   2297  CE2 TRP A 146     -31.526   8.403 -14.285  1.00 91.71           C  
ATOM   2298  CE3 TRP A 146     -29.860   6.702 -13.846  1.00 91.71           C  
ATOM   2299  HE3 TRP A 146     -28.831   6.376 -13.820  1.00 91.71           H  
ATOM   2300  NE1 TRP A 146     -31.510   9.726 -14.675  1.00 91.71           N  
ATOM   2301  HE1 TRP A 146     -32.330  10.249 -14.946  1.00 91.71           H  
ATOM   2302  CH2 TRP A 146     -32.238   6.163 -13.698  1.00 91.71           C  
ATOM   2303  HH2 TRP A 146     -33.023   5.441 -13.527  1.00 91.71           H  
ATOM   2304  CZ2 TRP A 146     -32.559   7.484 -14.053  1.00 91.71           C  
ATOM   2305  HZ2 TRP A 146     -33.591   7.779 -14.176  1.00 91.71           H  
ATOM   2306  CZ3 TRP A 146     -30.891   5.774 -13.603  1.00 91.71           C  
ATOM   2307  HZ3 TRP A 146     -30.648   4.749 -13.366  1.00 91.71           H  
ATOM   2308  N   ALA A 147     -27.036   7.537 -12.077  1.00 90.17           N  
ATOM   2309  H   ALA A 147     -26.409   7.319 -12.838  1.00 90.17           H  
ATOM   2310  CA  ALA A 147     -27.332   6.449 -11.155  1.00 90.17           C  
ATOM   2311  HA  ALA A 147     -28.412   6.307 -11.119  1.00 90.17           H  
ATOM   2312  C   ALA A 147     -26.860   6.756  -9.727  1.00 90.17           C  
ATOM   2313  CB  ALA A 147     -26.712   5.165 -11.719  1.00 90.17           C  
ATOM   2314  HB1 ALA A 147     -26.994   4.317 -11.094  1.00 90.17           H  
ATOM   2315  HB2 ALA A 147     -25.625   5.246 -11.747  1.00 90.17           H  
ATOM   2316  HB3 ALA A 147     -27.080   4.982 -12.728  1.00 90.17           H  
ATOM   2317  O   ALA A 147     -27.672   6.693  -8.807  1.00 90.17           O  
ATOM   2318  N   ALA A 148     -25.613   7.216  -9.545  1.00 87.68           N  
ATOM   2319  H   ALA A 148     -25.005   7.266 -10.350  1.00 87.68           H  
ATOM   2320  CA  ALA A 148     -25.013   7.538  -8.241  1.00 87.68           C  
ATOM   2321  HA  ALA A 148     -24.940   6.618  -7.660  1.00 87.68           H  
ATOM   2322  C   ALA A 148     -25.818   8.549  -7.397  1.00 87.68           C  
ATOM   2323  CB  ALA A 148     -23.595   8.068  -8.488  1.00 87.68           C  
ATOM   2324  HB1 ALA A 148     -23.108   8.265  -7.533  1.00 87.68           H  
ATOM   2325  HB2 ALA A 148     -23.007   7.327  -9.030  1.00 87.68           H  
ATOM   2326  HB3 ALA A 148     -23.630   8.988  -9.071  1.00 87.68           H  
ATOM   2327  O   ALA A 148     -25.670   8.606  -6.176  1.00 87.68           O  
ATOM   2328  N   GLY A 149     -26.725   9.308  -8.023  1.00 85.43           N  
ATOM   2329  H   GLY A 149     -26.803   9.188  -9.023  1.00 85.43           H  
ATOM   2330  CA  GLY A 149     -27.700  10.158  -7.337  1.00 85.43           C  
ATOM   2331  HA2 GLY A 149     -27.160  10.876  -6.721  1.00 85.43           H  
ATOM   2332  HA3 GLY A 149     -28.272  10.706  -8.086  1.00 85.43           H  
ATOM   2333  C   GLY A 149     -28.697   9.418  -6.426  1.00 85.43           C  
ATOM   2334  O   GLY A 149     -29.443  10.092  -5.716  1.00 85.43           O  
ATOM   2335  N   CYS A 150     -28.732   8.076  -6.415  1.00 81.85           N  
ATOM   2336  H   CYS A 150     -28.167   7.562  -7.076  1.00 81.85           H  
ATOM   2337  CA  CYS A 150     -29.441   7.302  -5.388  1.00 81.85           C  
ATOM   2338  HA  CYS A 150     -30.419   7.756  -5.232  1.00 81.85           H  
ATOM   2339  C   CYS A 150     -28.732   7.320  -4.023  1.00 81.85           C  
ATOM   2340  CB  CYS A 150     -29.672   5.863  -5.878  1.00 81.85           C  
ATOM   2341  HB2 CYS A 150     -30.258   5.896  -6.796  1.00 81.85           H  
ATOM   2342  HB3 CYS A 150     -30.245   5.316  -5.129  1.00 81.85           H  
ATOM   2343  O   CYS A 150     -29.391   7.206  -2.991  1.00 81.85           O  
ATOM   2344  SG  CYS A 150     -28.120   4.966  -6.194  1.00 81.85           S  
ATOM   2345  HG  CYS A 150     -27.670   4.871  -4.939  1.00 81.85           H  
ATOM   2346  N   CYS A 151     -27.407   7.491  -3.990  1.00 79.20           N  
ATOM   2347  H   CYS A 151     -26.908   7.614  -4.860  1.00 79.20           H  
ATOM   2348  CA  CYS A 151     -26.630   7.519  -2.756  1.00 79.20           C  
ATOM   2349  HA  CYS A 151     -27.033   6.775  -2.069  1.00 79.20           H  
ATOM   2350  C   CYS A 151     -26.721   8.899  -2.088  1.00 79.20           C  
ATOM   2351  CB  CYS A 151     -25.177   7.145  -3.077  1.00 79.20           C  
ATOM   2352  HB2 CYS A 151     -24.563   7.218  -2.179  1.00 79.20           H  
ATOM   2353  HB3 CYS A 151     -24.789   7.833  -3.827  1.00 79.20           H  
ATOM   2354  O   CYS A 151     -26.358   9.914  -2.683  1.00 79.20           O  
ATOM   2355  SG  CYS A 151     -25.082   5.452  -3.726  1.00 79.20           S  
ATOM   2356  HG  CYS A 151     -25.502   4.791  -2.644  1.00 79.20           H  
ATOM   2357  N   CYS A 152     -27.127   8.955  -0.814  1.00 78.66           N  
ATOM   2358  H   CYS A 152     -27.501   8.117  -0.394  1.00 78.66           H  
ATOM   2359  CA  CYS A 152     -27.309  10.219  -0.082  1.00 78.66           C  
ATOM   2360  HA  CYS A 152     -28.085  10.798  -0.582  1.00 78.66           H  
ATOM   2361  C   CYS A 152     -26.047  11.107  -0.054  1.00 78.66           C  
ATOM   2362  CB  CYS A 152     -27.800   9.898   1.337  1.00 78.66           C  
ATOM   2363  HB2 CYS A 152     -27.878  10.819   1.914  1.00 78.66           H  
ATOM   2364  HB3 CYS A 152     -27.098   9.230   1.837  1.00 78.66           H  
ATOM   2365  O   CYS A 152     -26.161  12.327  -0.152  1.00 78.66           O  
ATOM   2366  SG  CYS A 152     -29.436   9.115   1.236  1.00 78.66           S  
ATOM   2367  HG  CYS A 152     -29.568   8.812   2.530  1.00 78.66           H  
ATOM   2368  N   ARG A 153     -24.851  10.494  -0.026  1.00 80.49           N  
ATOM   2369  H   ARG A 153     -24.869   9.486   0.032  1.00 80.49           H  
ATOM   2370  CA  ARG A 153     -23.521  11.144  -0.107  1.00 80.49           C  
ATOM   2371  HA  ARG A 153     -23.450  11.872   0.700  1.00 80.49           H  
ATOM   2372  C   ARG A 153     -23.302  11.947  -1.411  1.00 80.49           C  
ATOM   2373  CB  ARG A 153     -22.464  10.034   0.137  1.00 80.49           C  
ATOM   2374  HB2 ARG A 153     -22.778   9.490   1.028  1.00 80.49           H  
ATOM   2375  HB3 ARG A 153     -22.499   9.332  -0.697  1.00 80.49           H  
ATOM   2376  O   ARG A 153     -22.393  12.774  -1.452  1.00 80.49           O  
ATOM   2377  CG  ARG A 153     -20.989  10.445   0.358  1.00 80.49           C  
ATOM   2378  HG2 ARG A 153     -20.547  10.713  -0.602  1.00 80.49           H  
ATOM   2379  HG3 ARG A 153     -20.942  11.305   1.027  1.00 80.49           H  
ATOM   2380  CD  ARG A 153     -20.206   9.268   0.994  1.00 80.49           C  
ATOM   2381  HD2 ARG A 153     -20.434   8.361   0.433  1.00 80.49           H  
ATOM   2382  HD3 ARG A 153     -20.565   9.129   2.014  1.00 80.49           H  
ATOM   2383  NE  ARG A 153     -18.733   9.438   1.001  1.00 80.49           N  
ATOM   2384  HE  ARG A 153     -18.324   9.959   0.238  1.00 80.49           H  
ATOM   2385  NH1 ARG A 153     -18.200   8.042   2.776  1.00 80.49           N  
ATOM   2386 HH11 ARG A 153     -19.160   7.826   3.004  1.00 80.49           H  
ATOM   2387 HH12 ARG A 153     -17.445   7.580   3.262  1.00 80.49           H  
ATOM   2388  NH2 ARG A 153     -16.577   8.904   1.573  1.00 80.49           N  
ATOM   2389 HH21 ARG A 153     -16.163   9.363   0.774  1.00 80.49           H  
ATOM   2390 HH22 ARG A 153     -15.953   8.336   2.129  1.00 80.49           H  
ATOM   2391  CZ  ARG A 153     -17.857   8.803   1.781  1.00 80.49           C  
ATOM   2392  N   TYR A 154     -24.154  11.749  -2.427  1.00 84.79           N  
ATOM   2393  H   TYR A 154     -24.864  11.043  -2.300  1.00 84.79           H  
ATOM   2394  CA  TYR A 154     -24.090  12.359  -3.764  1.00 84.79           C  
ATOM   2395  HA  TYR A 154     -23.434  13.228  -3.714  1.00 84.79           H  
ATOM   2396  C   TYR A 154     -25.453  12.877  -4.295  1.00 84.79           C  
ATOM   2397  CB  TYR A 154     -23.453  11.349  -4.734  1.00 84.79           C  
ATOM   2398  HB2 TYR A 154     -23.352  11.814  -5.715  1.00 84.79           H  
ATOM   2399  HB3 TYR A 154     -24.124  10.497  -4.845  1.00 84.79           H  
ATOM   2400  O   TYR A 154     -25.605  13.117  -5.494  1.00 84.79           O  
ATOM   2401  CG  TYR A 154     -22.080  10.860  -4.307  1.00 84.79           C  
ATOM   2402  CD1 TYR A 154     -21.004  11.766  -4.256  1.00 84.79           C  
ATOM   2403  HD1 TYR A 154     -21.162  12.801  -4.522  1.00 84.79           H  
ATOM   2404  CD2 TYR A 154     -21.877   9.509  -3.961  1.00 84.79           C  
ATOM   2405  HD2 TYR A 154     -22.694   8.805  -4.022  1.00 84.79           H  
ATOM   2406  CE1 TYR A 154     -19.721  11.325  -3.884  1.00 84.79           C  
ATOM   2407  HE1 TYR A 154     -18.893  12.019  -3.869  1.00 84.79           H  
ATOM   2408  CE2 TYR A 154     -20.596   9.066  -3.572  1.00 84.79           C  
ATOM   2409  HE2 TYR A 154     -20.425   8.028  -3.328  1.00 84.79           H  
ATOM   2410  OH  TYR A 154     -18.272   9.544  -3.207  1.00 84.79           O  
ATOM   2411  HH  TYR A 154     -17.612  10.228  -3.340  1.00 84.79           H  
ATOM   2412  CZ  TYR A 154     -19.515   9.972  -3.546  1.00 84.79           C  
ATOM   2413  N   ARG A 155     -26.457  13.094  -3.430  1.00 79.09           N  
ATOM   2414  H   ARG A 155     -26.282  12.908  -2.452  1.00 79.09           H  
ATOM   2415  CA  ARG A 155     -27.808  13.538  -3.838  1.00 79.09           C  
ATOM   2416  HA  ARG A 155     -28.110  12.895  -4.665  1.00 79.09           H  
ATOM   2417  C   ARG A 155     -27.831  14.994  -4.350  1.00 79.09           C  
ATOM   2418  CB  ARG A 155     -28.786  13.300  -2.668  1.00 79.09           C  
ATOM   2419  HB2 ARG A 155     -28.624  12.291  -2.289  1.00 79.09           H  
ATOM   2420  HB3 ARG A 155     -28.566  14.006  -1.867  1.00 79.09           H  
ATOM   2421  O   ARG A 155     -27.246  15.884  -3.738  1.00 79.09           O  
ATOM   2422  CG  ARG A 155     -30.266  13.417  -3.076  1.00 79.09           C  
ATOM   2423  HG2 ARG A 155     -30.479  14.426  -3.429  1.00 79.09           H  
ATOM   2424  HG3 ARG A 155     -30.450  12.724  -3.897  1.00 79.09           H  
ATOM   2425  CD  ARG A 155     -31.235  13.066  -1.932  1.00 79.09           C  
ATOM   2426  HD2 ARG A 155     -30.928  12.121  -1.485  1.00 79.09           H  
ATOM   2427  HD3 ARG A 155     -32.226  12.937  -2.366  1.00 79.09           H  
ATOM   2428  NE  ARG A 155     -31.299  14.113  -0.888  1.00 79.09           N  
ATOM   2429  HE  ARG A 155     -30.633  14.870  -0.955  1.00 79.09           H  
ATOM   2430  NH1 ARG A 155     -33.085  13.277   0.301  1.00 79.09           N  
ATOM   2431 HH11 ARG A 155     -33.094  12.455  -0.285  1.00 79.09           H  
ATOM   2432 HH12 ARG A 155     -33.728  13.362   1.076  1.00 79.09           H  
ATOM   2433  NH2 ARG A 155     -32.165  15.205   0.922  1.00 79.09           N  
ATOM   2434 HH21 ARG A 155     -32.874  15.295   1.636  1.00 79.09           H  
ATOM   2435 HH22 ARG A 155     -31.461  15.926   0.856  1.00 79.09           H  
ATOM   2436  CZ  ARG A 155     -32.178  14.192   0.101  1.00 79.09           C  
ATOM   2437  N   GLY A 156     -28.577  15.256  -5.429  1.00 86.26           N  
ATOM   2438  H   GLY A 156     -28.986  14.468  -5.911  1.00 86.26           H  
ATOM   2439  CA  GLY A 156     -28.759  16.599  -6.016  1.00 86.26           C  
ATOM   2440  HA2 GLY A 156     -29.632  16.587  -6.668  1.00 86.26           H  
ATOM   2441  HA3 GLY A 156     -28.951  17.316  -5.218  1.00 86.26           H  
ATOM   2442  C   GLY A 156     -27.557  17.103  -6.834  1.00 86.26           C  
ATOM   2443  O   GLY A 156     -26.556  16.406  -6.962  1.00 86.26           O  
ATOM   2444  N   TRP A 157     -27.631  18.315  -7.404  1.00 85.81           N  
ATOM   2445  H   TRP A 157     -28.482  18.850  -7.303  1.00 85.81           H  
ATOM   2446  CA  TRP A 157     -26.589  18.839  -8.314  1.00 85.81           C  
ATOM   2447  HA  TRP A 157     -26.449  18.128  -9.128  1.00 85.81           H  
ATOM   2448  C   TRP A 157     -25.219  19.001  -7.635  1.00 85.81           C  
ATOM   2449  CB  TRP A 157     -27.053  20.163  -8.936  1.00 85.81           C  
ATOM   2450  HB2 TRP A 157     -28.047  20.021  -9.361  1.00 85.81           H  
ATOM   2451  HB3 TRP A 157     -27.135  20.924  -8.160  1.00 85.81           H  
ATOM   2452  O   TRP A 157     -24.222  18.453  -8.105  1.00 85.81           O  
ATOM   2453  CG  TRP A 157     -26.165  20.674 -10.031  1.00 85.81           C  
ATOM   2454  CD1 TRP A 157     -25.238  21.654  -9.918  1.00 85.81           C  
ATOM   2455  HD1 TRP A 157     -25.026  22.215  -9.020  1.00 85.81           H  
ATOM   2456  CD2 TRP A 157     -26.125  20.250 -11.431  1.00 85.81           C  
ATOM   2457  CE2 TRP A 157     -25.130  21.017 -12.108  1.00 85.81           C  
ATOM   2458  CE3 TRP A 157     -26.846  19.310 -12.201  1.00 85.81           C  
ATOM   2459  HE3 TRP A 157     -27.635  18.738 -11.737  1.00 85.81           H  
ATOM   2460  NE1 TRP A 157     -24.625  21.857 -11.140  1.00 85.81           N  
ATOM   2461  HE1 TRP A 157     -23.950  22.585 -11.322  1.00 85.81           H  
ATOM   2462  CH2 TRP A 157     -25.589  19.914 -14.210  1.00 85.81           C  
ATOM   2463  HH2 TRP A 157     -25.405  19.796 -15.268  1.00 85.81           H  
ATOM   2464  CZ2 TRP A 157     -24.855  20.857 -13.473  1.00 85.81           C  
ATOM   2465  HZ2 TRP A 157     -24.109  21.468 -13.960  1.00 85.81           H  
ATOM   2466  CZ3 TRP A 157     -26.581  19.145 -13.576  1.00 85.81           C  
ATOM   2467  HZ3 TRP A 157     -27.157  18.445 -14.163  1.00 85.81           H  
ATOM   2468  N   ARG A 158     -25.183  19.655  -6.461  1.00 89.24           N  
ATOM   2469  H   ARG A 158     -26.041  20.076  -6.137  1.00 89.24           H  
ATOM   2470  CA  ARG A 158     -23.971  19.762  -5.621  1.00 89.24           C  
ATOM   2471  HA  ARG A 158     -23.177  20.223  -6.208  1.00 89.24           H  
ATOM   2472  C   ARG A 158     -23.423  18.380  -5.215  1.00 89.24           C  
ATOM   2473  CB  ARG A 158     -24.248  20.647  -4.382  1.00 89.24           C  
ATOM   2474  HB2 ARG A 158     -25.110  20.250  -3.844  1.00 89.24           H  
ATOM   2475  HB3 ARG A 158     -23.385  20.586  -3.720  1.00 89.24           H  
ATOM   2476  O   ARG A 158     -22.215  18.229  -5.063  1.00 89.24           O  
ATOM   2477  CG  ARG A 158     -24.492  22.138  -4.707  1.00 89.24           C  
ATOM   2478  HG2 ARG A 158     -23.619  22.533  -5.226  1.00 89.24           H  
ATOM   2479  HG3 ARG A 158     -25.358  22.230  -5.362  1.00 89.24           H  
ATOM   2480  CD  ARG A 158     -24.739  22.973  -3.433  1.00 89.24           C  
ATOM   2481  HD2 ARG A 158     -23.886  22.853  -2.764  1.00 89.24           H  
ATOM   2482  HD3 ARG A 158     -25.627  22.588  -2.932  1.00 89.24           H  
ATOM   2483  NE  ARG A 158     -24.924  24.414  -3.723  1.00 89.24           N  
ATOM   2484  HE  ARG A 158     -24.727  24.725  -4.664  1.00 89.24           H  
ATOM   2485  NH1 ARG A 158     -25.582  25.115  -1.622  1.00 89.24           N  
ATOM   2486 HH11 ARG A 158     -25.532  24.172  -1.263  1.00 89.24           H  
ATOM   2487 HH12 ARG A 158     -25.882  25.860  -1.009  1.00 89.24           H  
ATOM   2488  NH2 ARG A 158     -25.408  26.601  -3.265  1.00 89.24           N  
ATOM   2489 HH21 ARG A 158     -25.211  26.873  -4.217  1.00 89.24           H  
ATOM   2490 HH22 ARG A 158     -25.701  27.315  -2.614  1.00 89.24           H  
ATOM   2491  CZ  ARG A 158     -25.301  25.362  -2.872  1.00 89.24           C  
ATOM   2492  N   GLY A 159     -24.289  17.368  -5.092  1.00 88.08           N  
ATOM   2493  H   GLY A 159     -25.267  17.554  -5.264  1.00 88.08           H  
ATOM   2494  CA  GLY A 159     -23.913  15.978  -4.829  1.00 88.08           C  
ATOM   2495  HA2 GLY A 159     -24.808  15.439  -4.518  1.00 88.08           H  
ATOM   2496  HA3 GLY A 159     -23.190  15.940  -4.015  1.00 88.08           H  
ATOM   2497  C   GLY A 159     -23.318  15.256  -6.044  1.00 88.08           C  
ATOM   2498  O   GLY A 159     -22.248  14.663  -5.926  1.00 88.08           O  
ATOM   2499  N   ARG A 160     -23.934  15.365  -7.229  1.00 90.21           N  
ATOM   2500  H   ARG A 160     -24.828  15.834  -7.248  1.00 90.21           H  
ATOM   2501  CA  ARG A 160     -23.405  14.804  -8.488  1.00 90.21           C  
ATOM   2502  HA  ARG A 160     -23.215  13.740  -8.344  1.00 90.21           H  
ATOM   2503  C   ARG A 160     -22.051  15.407  -8.863  1.00 90.21           C  
ATOM   2504  CB  ARG A 160     -24.421  14.971  -9.632  1.00 90.21           C  
ATOM   2505  HB2 ARG A 160     -24.893  15.952  -9.570  1.00 90.21           H  
ATOM   2506  HB3 ARG A 160     -23.888  14.913 -10.581  1.00 90.21           H  
ATOM   2507  O   ARG A 160     -21.146  14.661  -9.220  1.00 90.21           O  
ATOM   2508  CG  ARG A 160     -25.491  13.867  -9.623  1.00 90.21           C  
ATOM   2509  HG2 ARG A 160     -24.998  12.897  -9.686  1.00 90.21           H  
ATOM   2510  HG3 ARG A 160     -26.063  13.912  -8.696  1.00 90.21           H  
ATOM   2511  CD  ARG A 160     -26.440  14.027 -10.821  1.00 90.21           C  
ATOM   2512  HD2 ARG A 160     -25.847  14.128 -11.730  1.00 90.21           H  
ATOM   2513  HD3 ARG A 160     -27.016  14.942 -10.680  1.00 90.21           H  
ATOM   2514  NE  ARG A 160     -27.341  12.864 -10.972  1.00 90.21           N  
ATOM   2515  HE  ARG A 160     -26.926  11.966 -10.769  1.00 90.21           H  
ATOM   2516  NH1 ARG A 160     -29.064  13.929 -12.057  1.00 90.21           N  
ATOM   2517 HH11 ARG A 160     -28.482  14.749 -12.151  1.00 90.21           H  
ATOM   2518 HH12 ARG A 160     -29.964  13.897 -12.515  1.00 90.21           H  
ATOM   2519  NH2 ARG A 160     -29.275  11.779 -11.546  1.00 90.21           N  
ATOM   2520 HH21 ARG A 160     -28.890  10.902 -11.225  1.00 90.21           H  
ATOM   2521 HH22 ARG A 160     -30.138  11.752 -12.070  1.00 90.21           H  
ATOM   2522  CZ  ARG A 160     -28.548  12.860 -11.515  1.00 90.21           C  
ATOM   2523  N   LEU A 161     -21.854  16.715  -8.676  1.00 90.36           N  
ATOM   2524  H   LEU A 161     -22.649  17.288  -8.429  1.00 90.36           H  
ATOM   2525  CA  LEU A 161     -20.541  17.352  -8.848  1.00 90.36           C  
ATOM   2526  HA  LEU A 161     -20.191  17.129  -9.857  1.00 90.36           H  
ATOM   2527  C   LEU A 161     -19.488  16.795  -7.865  1.00 90.36           C  
ATOM   2528  CB  LEU A 161     -20.719  18.876  -8.714  1.00 90.36           C  
ATOM   2529  HB2 LEU A 161     -21.468  19.200  -9.436  1.00 90.36           H  
ATOM   2530  HB3 LEU A 161     -21.100  19.094  -7.716  1.00 90.36           H  
ATOM   2531  O   LEU A 161     -18.321  16.642  -8.223  1.00 90.36           O  
ATOM   2532  CG  LEU A 161     -19.434  19.699  -8.938  1.00 90.36           C  
ATOM   2533  HG  LEU A 161     -18.696  19.435  -8.181  1.00 90.36           H  
ATOM   2534  CD1 LEU A 161     -18.819  19.481 -10.322  1.00 90.36           C  
ATOM   2535 HD11 LEU A 161     -18.446  18.461 -10.414  1.00 90.36           H  
ATOM   2536 HD12 LEU A 161     -19.566  19.660 -11.096  1.00 90.36           H  
ATOM   2537 HD13 LEU A 161     -17.987  20.168 -10.473  1.00 90.36           H  
ATOM   2538  CD2 LEU A 161     -19.753  21.186  -8.787  1.00 90.36           C  
ATOM   2539 HD21 LEU A 161     -20.172  21.378  -7.799  1.00 90.36           H  
ATOM   2540 HD22 LEU A 161     -20.469  21.494  -9.549  1.00 90.36           H  
ATOM   2541 HD23 LEU A 161     -18.842  21.775  -8.900  1.00 90.36           H  
ATOM   2542  N   LYS A 162     -19.903  16.426  -6.645  1.00 90.04           N  
ATOM   2543  H   LYS A 162     -20.873  16.581  -6.411  1.00 90.04           H  
ATOM   2544  CA  LYS A 162     -19.050  15.765  -5.642  1.00 90.04           C  
ATOM   2545  HA  LYS A 162     -18.077  16.255  -5.662  1.00 90.04           H  
ATOM   2546  C   LYS A 162     -18.769  14.284  -5.960  1.00 90.04           C  
ATOM   2547  CB  LYS A 162     -19.670  15.986  -4.248  1.00 90.04           C  
ATOM   2548  HB2 LYS A 162     -20.015  17.019  -4.189  1.00 90.04           H  
ATOM   2549  HB3 LYS A 162     -20.532  15.331  -4.117  1.00 90.04           H  
ATOM   2550  O   LYS A 162     -17.817  13.736  -5.412  1.00 90.04           O  
ATOM   2551  CG  LYS A 162     -18.681  15.759  -3.094  1.00 90.04           C  
ATOM   2552  HG2 LYS A 162     -18.406  14.705  -3.046  1.00 90.04           H  
ATOM   2553  HG3 LYS A 162     -17.785  16.352  -3.274  1.00 90.04           H  
ATOM   2554  CD  LYS A 162     -19.297  16.178  -1.751  1.00 90.04           C  
ATOM   2555  HD2 LYS A 162     -19.631  17.214  -1.820  1.00 90.04           H  
ATOM   2556  HD3 LYS A 162     -20.154  15.540  -1.535  1.00 90.04           H  
ATOM   2557  CE  LYS A 162     -18.254  16.052  -0.632  1.00 90.04           C  
ATOM   2558  HE2 LYS A 162     -17.952  15.007  -0.556  1.00 90.04           H  
ATOM   2559  HE3 LYS A 162     -17.374  16.629  -0.915  1.00 90.04           H  
ATOM   2560  NZ  LYS A 162     -18.776  16.534   0.674  1.00 90.04           N  
ATOM   2561  HZ1 LYS A 162     -19.589  16.002   0.951  1.00 90.04           H  
ATOM   2562  HZ2 LYS A 162     -18.072  16.440   1.392  1.00 90.04           H  
ATOM   2563  HZ3 LYS A 162     -19.034  17.508   0.616  1.00 90.04           H  
ATOM   2564  N   PHE A 163     -19.537  13.653  -6.855  1.00 88.84           N  
ATOM   2565  H   PHE A 163     -20.340  14.146  -7.219  1.00 88.84           H  
ATOM   2566  CA  PHE A 163     -19.214  12.343  -7.439  1.00 88.84           C  
ATOM   2567  HA  PHE A 163     -18.698  11.737  -6.694  1.00 88.84           H  
ATOM   2568  C   PHE A 163     -18.270  12.478  -8.641  1.00 88.84           C  
ATOM   2569  CB  PHE A 163     -20.498  11.599  -7.835  1.00 88.84           C  
ATOM   2570  HB2 PHE A 163     -21.172  11.563  -6.979  1.00 88.84           H  
ATOM   2571  HB3 PHE A 163     -21.011  12.147  -8.625  1.00 88.84           H  
ATOM   2572  O   PHE A 163     -17.254  11.792  -8.698  1.00 88.84           O  
ATOM   2573  CG  PHE A 163     -20.248  10.182  -8.317  1.00 88.84           C  
ATOM   2574  CD1 PHE A 163     -19.947   9.936  -9.671  1.00 88.84           C  
ATOM   2575  HD1 PHE A 163     -19.880  10.755 -10.372  1.00 88.84           H  
ATOM   2576  CD2 PHE A 163     -20.299   9.106  -7.411  1.00 88.84           C  
ATOM   2577  HD2 PHE A 163     -20.532   9.285  -6.372  1.00 88.84           H  
ATOM   2578  CE1 PHE A 163     -19.713   8.625 -10.118  1.00 88.84           C  
ATOM   2579  HE1 PHE A 163     -19.482   8.444 -11.158  1.00 88.84           H  
ATOM   2580  CE2 PHE A 163     -20.064   7.793  -7.858  1.00 88.84           C  
ATOM   2581  HE2 PHE A 163     -20.124   6.964  -7.169  1.00 88.84           H  
ATOM   2582  CZ  PHE A 163     -19.775   7.553  -9.213  1.00 88.84           C  
ATOM   2583  HZ  PHE A 163     -19.606   6.545  -9.561  1.00 88.84           H  
ATOM   2584  N   ALA A 164     -18.556  13.400  -9.568  1.00 89.96           N  
ATOM   2585  H   ALA A 164     -19.424  13.910  -9.487  1.00 89.96           H  
ATOM   2586  CA  ALA A 164     -17.727  13.650 -10.752  1.00 89.96           C  
ATOM   2587  HA  ALA A 164     -17.694  12.743 -11.357  1.00 89.96           H  
ATOM   2588  C   ALA A 164     -16.274  14.017 -10.392  1.00 89.96           C  
ATOM   2589  CB  ALA A 164     -18.395  14.757 -11.576  1.00 89.96           C  
ATOM   2590  HB1 ALA A 164     -17.838  14.902 -12.502  1.00 89.96           H  
ATOM   2591  HB2 ALA A 164     -19.417  14.471 -11.826  1.00 89.96           H  
ATOM   2592  HB3 ALA A 164     -18.405  15.691 -11.015  1.00 89.96           H  
ATOM   2593  O   ALA A 164     -15.348  13.661 -11.110  1.00 89.96           O  
ATOM   2594  N   ARG A 165     -16.062  14.657  -9.233  1.00 91.89           N  
ATOM   2595  H   ARG A 165     -16.879  14.967  -8.726  1.00 91.89           H  
ATOM   2596  CA  ARG A 165     -14.734  14.964  -8.673  1.00 91.89           C  
ATOM   2597  HA  ARG A 165     -14.060  15.120  -9.516  1.00 91.89           H  
ATOM   2598  C   ARG A 165     -14.059  13.795  -7.917  1.00 91.89           C  
ATOM   2599  CB  ARG A 165     -14.788  16.297  -7.896  1.00 91.89           C  
ATOM   2600  HB2 ARG A 165     -15.566  16.244  -7.134  1.00 91.89           H  
ATOM   2601  HB3 ARG A 165     -13.831  16.466  -7.402  1.00 91.89           H  
ATOM   2602  O   ARG A 165     -13.100  14.028  -7.186  1.00 91.89           O  
ATOM   2603  CG  ARG A 165     -15.053  17.486  -8.841  1.00 91.89           C  
ATOM   2604  HG2 ARG A 165     -14.260  17.519  -9.588  1.00 91.89           H  
ATOM   2605  HG3 ARG A 165     -16.003  17.346  -9.355  1.00 91.89           H  
ATOM   2606  CD  ARG A 165     -15.087  18.828  -8.096  1.00 91.89           C  
ATOM   2607  HD2 ARG A 165     -14.146  18.947  -7.559  1.00 91.89           H  
ATOM   2608  HD3 ARG A 165     -15.908  18.810  -7.378  1.00 91.89           H  
ATOM   2609  NE  ARG A 165     -15.271  19.955  -9.036  1.00 91.89           N  
ATOM   2610  HE  ARG A 165     -15.502  19.706  -9.987  1.00 91.89           H  
ATOM   2611  NH1 ARG A 165     -14.757  21.689  -7.612  1.00 91.89           N  
ATOM   2612 HH11 ARG A 165     -14.556  21.022  -6.880  1.00 91.89           H  
ATOM   2613 HH12 ARG A 165     -14.559  22.670  -7.479  1.00 91.89           H  
ATOM   2614  NH2 ARG A 165     -15.246  22.123  -9.741  1.00 91.89           N  
ATOM   2615 HH21 ARG A 165     -15.064  23.102  -9.571  1.00 91.89           H  
ATOM   2616 HH22 ARG A 165     -15.426  21.828 -10.690  1.00 91.89           H  
ATOM   2617  CZ  ARG A 165     -15.094  21.244  -8.791  1.00 91.89           C  
ATOM   2618  N   LYS A 166     -14.495  12.538  -8.102  1.00 87.61           N  
ATOM   2619  H   LYS A 166     -15.320  12.414  -8.670  1.00 87.61           H  
ATOM   2620  CA  LYS A 166     -13.629  11.352  -7.895  1.00 87.61           C  
ATOM   2621  HA  LYS A 166     -13.242  11.353  -6.876  1.00 87.61           H  
ATOM   2622  C   LYS A 166     -12.454  11.420  -8.890  1.00 87.61           C  
ATOM   2623  CB  LYS A 166     -14.392  10.042  -8.190  1.00 87.61           C  
ATOM   2624  HB2 LYS A 166     -14.953  10.168  -9.116  1.00 87.61           H  
ATOM   2625  HB3 LYS A 166     -13.650   9.264  -8.369  1.00 87.61           H  
ATOM   2626  O   LYS A 166     -12.722  11.698 -10.056  1.00 87.61           O  
ATOM   2627  CG  LYS A 166     -15.349   9.509  -7.111  1.00 87.61           C  
ATOM   2628  HG2 LYS A 166     -14.791   9.339  -6.190  1.00 87.61           H  
ATOM   2629  HG3 LYS A 166     -16.146  10.227  -6.920  1.00 87.61           H  
ATOM   2630  CD  LYS A 166     -15.944   8.175  -7.609  1.00 87.61           C  
ATOM   2631  HD2 LYS A 166     -15.124   7.513  -7.891  1.00 87.61           H  
ATOM   2632  HD3 LYS A 166     -16.555   8.358  -8.492  1.00 87.61           H  
ATOM   2633  CE  LYS A 166     -16.799   7.466  -6.552  1.00 87.61           C  
ATOM   2634  HE2 LYS A 166     -16.278   7.513  -5.596  1.00 87.61           H  
ATOM   2635  HE3 LYS A 166     -17.748   7.994  -6.453  1.00 87.61           H  
ATOM   2636  NZ  LYS A 166     -17.036   6.042  -6.908  1.00 87.61           N  
ATOM   2637  HZ1 LYS A 166     -17.601   5.918  -7.735  1.00 87.61           H  
ATOM   2638  HZ2 LYS A 166     -16.183   5.537  -7.102  1.00 87.61           H  
ATOM   2639  HZ3 LYS A 166     -17.553   5.538  -6.201  1.00 87.61           H  
ATOM   2640  N   PRO A 167     -11.205  11.063  -8.530  1.00 86.86           N  
ATOM   2641  CA  PRO A 167     -10.081  11.089  -9.477  1.00 86.86           C  
ATOM   2642  HA  PRO A 167      -9.913  12.111  -9.815  1.00 86.86           H  
ATOM   2643  C   PRO A 167     -10.347  10.225 -10.720  1.00 86.86           C  
ATOM   2644  CB  PRO A 167      -8.854  10.625  -8.683  1.00 86.86           C  
ATOM   2645  HB2 PRO A 167      -8.319  11.497  -8.306  1.00 86.86           H  
ATOM   2646  HB3 PRO A 167      -8.184  10.007  -9.280  1.00 86.86           H  
ATOM   2647  O   PRO A 167     -10.217  10.709 -11.838  1.00 86.86           O  
ATOM   2648  CG  PRO A 167      -9.444   9.846  -7.506  1.00 86.86           C  
ATOM   2649  HG2 PRO A 167      -8.786   9.868  -6.638  1.00 86.86           H  
ATOM   2650  HG3 PRO A 167      -9.641   8.818  -7.809  1.00 86.86           H  
ATOM   2651  CD  PRO A 167     -10.765  10.567  -7.236  1.00 86.86           C  
ATOM   2652  HD2 PRO A 167     -10.595  11.410  -6.565  1.00 86.86           H  
ATOM   2653  HD3 PRO A 167     -11.485   9.875  -6.800  1.00 86.86           H  
ATOM   2654  N   PHE A 168     -10.866   9.005 -10.547  1.00 85.90           N  
ATOM   2655  H   PHE A 168     -10.871   8.611  -9.617  1.00 85.90           H  
ATOM   2656  CA  PHE A 168     -11.240   8.123 -11.662  1.00 85.90           C  
ATOM   2657  HA  PHE A 168     -10.372   8.006 -12.311  1.00 85.90           H  
ATOM   2658  C   PHE A 168     -12.373   8.673 -12.550  1.00 85.90           C  
ATOM   2659  CB  PHE A 168     -11.597   6.735 -11.106  1.00 85.90           C  
ATOM   2660  HB2 PHE A 168     -12.495   6.811 -10.493  1.00 85.90           H  
ATOM   2661  HB3 PHE A 168     -11.822   6.070 -11.940  1.00 85.90           H  
ATOM   2662  O   PHE A 168     -12.464   8.286 -13.707  1.00 85.90           O  
ATOM   2663  CG  PHE A 168     -10.476   6.120 -10.291  1.00 85.90           C  
ATOM   2664  CD1 PHE A 168      -9.355   5.573 -10.945  1.00 85.90           C  
ATOM   2665  HD1 PHE A 168      -9.318   5.523 -12.023  1.00 85.90           H  
ATOM   2666  CD2 PHE A 168     -10.516   6.154  -8.883  1.00 85.90           C  
ATOM   2667  HD2 PHE A 168     -11.383   6.547  -8.373  1.00 85.90           H  
ATOM   2668  CE1 PHE A 168      -8.271   5.086 -10.196  1.00 85.90           C  
ATOM   2669  HE1 PHE A 168      -7.417   4.659 -10.701  1.00 85.90           H  
ATOM   2670  CE2 PHE A 168      -9.425   5.676  -8.135  1.00 85.90           C  
ATOM   2671  HE2 PHE A 168      -9.449   5.703  -7.055  1.00 85.90           H  
ATOM   2672  CZ  PHE A 168      -8.300   5.147  -8.792  1.00 85.90           C  
ATOM   2673  HZ  PHE A 168      -7.460   4.773  -8.227  1.00 85.90           H  
ATOM   2674  N   CYS A 169     -13.217   9.588 -12.052  1.00 88.29           N  
ATOM   2675  H   CYS A 169     -13.026   9.965 -11.134  1.00 88.29           H  
ATOM   2676  CA  CYS A 169     -14.240  10.271 -12.858  1.00 88.29           C  
ATOM   2677  HA  CYS A 169     -14.536   9.627 -13.686  1.00 88.29           H  
ATOM   2678  C   CYS A 169     -13.728  11.572 -13.502  1.00 88.29           C  
ATOM   2679  CB  CYS A 169     -15.487  10.524 -12.004  1.00 88.29           C  
ATOM   2680  HB2 CYS A 169     -15.209  11.092 -11.115  1.00 88.29           H  
ATOM   2681  HB3 CYS A 169     -16.197  11.119 -12.579  1.00 88.29           H  
ATOM   2682  O   CYS A 169     -14.271  11.981 -14.522  1.00 88.29           O  
ATOM   2683  SG  CYS A 169     -16.259   8.943 -11.546  1.00 88.29           S  
ATOM   2684  HG  CYS A 169     -15.146   8.213 -11.659  1.00 88.29           H  
ATOM   2685  N   VAL A 170     -12.667  12.184 -12.961  1.00 90.03           N  
ATOM   2686  H   VAL A 170     -12.307  11.836 -12.083  1.00 90.03           H  
ATOM   2687  CA  VAL A 170     -11.917  13.255 -13.637  1.00 90.03           C  
ATOM   2688  HA  VAL A 170     -12.628  13.964 -14.062  1.00 90.03           H  
ATOM   2689  C   VAL A 170     -11.111  12.674 -14.802  1.00 90.03           C  
ATOM   2690  CB  VAL A 170     -11.021  14.035 -12.654  1.00 90.03           C  
ATOM   2691  HB  VAL A 170     -10.345  13.343 -12.151  1.00 90.03           H  
ATOM   2692  O   VAL A 170     -11.163  13.227 -15.893  1.00 90.03           O  
ATOM   2693  CG1 VAL A 170     -10.180  15.108 -13.358  1.00 90.03           C  
ATOM   2694 HG11 VAL A 170     -10.825  15.784 -13.918  1.00 90.03           H  
ATOM   2695 HG12 VAL A 170      -9.608  15.679 -12.626  1.00 90.03           H  
ATOM   2696 HG13 VAL A 170      -9.474  14.646 -14.048  1.00 90.03           H  
ATOM   2697  CG2 VAL A 170     -11.866  14.753 -11.590  1.00 90.03           C  
ATOM   2698 HG21 VAL A 170     -11.209  15.231 -10.863  1.00 90.03           H  
ATOM   2699 HG22 VAL A 170     -12.504  14.040 -11.070  1.00 90.03           H  
ATOM   2700 HG23 VAL A 170     -12.495  15.506 -12.065  1.00 90.03           H  
ATOM   2701  N   ILE A 171     -10.447  11.527 -14.611  1.00 88.49           N  
ATOM   2702  H   ILE A 171     -10.405  11.154 -13.673  1.00 88.49           H  
ATOM   2703  CA  ILE A 171      -9.755  10.790 -15.684  1.00 88.49           C  
ATOM   2704  HA  ILE A 171      -9.014  11.448 -16.139  1.00 88.49           H  
ATOM   2705  C   ILE A 171     -10.743  10.401 -16.793  1.00 88.49           C  
ATOM   2706  CB  ILE A 171      -9.015   9.557 -15.104  1.00 88.49           C  
ATOM   2707  HB  ILE A 171      -9.728   8.977 -14.517  1.00 88.49           H  
ATOM   2708  O   ILE A 171     -10.457  10.628 -17.962  1.00 88.49           O  
ATOM   2709  CG1 ILE A 171      -7.861  10.014 -14.178  1.00 88.49           C  
ATOM   2710 HG12 ILE A 171      -8.210  10.801 -13.510  1.00 88.49           H  
ATOM   2711 HG13 ILE A 171      -7.059  10.436 -14.782  1.00 88.49           H  
ATOM   2712  CG2 ILE A 171      -8.459   8.646 -16.217  1.00 88.49           C  
ATOM   2713 HG21 ILE A 171      -7.933   7.791 -15.793  1.00 88.49           H  
ATOM   2714 HG22 ILE A 171      -7.772   9.204 -16.853  1.00 88.49           H  
ATOM   2715 HG23 ILE A 171      -9.265   8.251 -16.836  1.00 88.49           H  
ATOM   2716  CD1 ILE A 171      -7.288   8.895 -13.297  1.00 88.49           C  
ATOM   2717 HD11 ILE A 171      -6.786   8.145 -13.908  1.00 88.49           H  
ATOM   2718 HD12 ILE A 171      -6.559   9.321 -12.607  1.00 88.49           H  
ATOM   2719 HD13 ILE A 171      -8.085   8.425 -12.721  1.00 88.49           H  
ATOM   2720  N   ASP A 172     -11.922   9.884 -16.431  1.00 88.74           N  
ATOM   2721  H   ASP A 172     -12.065   9.671 -15.454  1.00 88.74           H  
ATOM   2722  CA  ASP A 172     -13.001   9.528 -17.365  1.00 88.74           C  
ATOM   2723  HA  ASP A 172     -12.673   8.692 -17.983  1.00 88.74           H  
ATOM   2724  C   ASP A 172     -13.370  10.687 -18.309  1.00 88.74           C  
ATOM   2725  CB  ASP A 172     -14.199   9.078 -16.516  1.00 88.74           C  
ATOM   2726  HB2 ASP A 172     -14.611   9.935 -15.983  1.00 88.74           H  
ATOM   2727  HB3 ASP A 172     -13.839   8.363 -15.776  1.00 88.74           H  
ATOM   2728  O   ASP A 172     -13.243  10.556 -19.527  1.00 88.74           O  
ATOM   2729  CG  ASP A 172     -15.340   8.387 -17.251  1.00 88.74           C  
ATOM   2730  OD1 ASP A 172     -15.381   8.348 -18.496  1.00 88.74           O  
ATOM   2731  OD2 ASP A 172     -16.176   7.802 -16.528  1.00 88.74           O  
ATOM   2732  N   ILE A 173     -13.734  11.853 -17.758  1.00 89.21           N  
ATOM   2733  H   ILE A 173     -13.786  11.921 -16.752  1.00 89.21           H  
ATOM   2734  CA  ILE A 173     -14.123  13.015 -18.570  1.00 89.21           C  
ATOM   2735  HA  ILE A 173     -14.761  12.626 -19.363  1.00 89.21           H  
ATOM   2736  C   ILE A 173     -12.935  13.689 -19.270  1.00 89.21           C  
ATOM   2737  CB  ILE A 173     -14.978  14.000 -17.743  1.00 89.21           C  
ATOM   2738  HB  ILE A 173     -15.762  13.410 -17.269  1.00 89.21           H  
ATOM   2739  O   ILE A 173     -13.103  14.195 -20.374  1.00 89.21           O  
ATOM   2740  CG1 ILE A 173     -15.669  15.100 -18.576  1.00 89.21           C  
ATOM   2741 HG12 ILE A 173     -16.310  15.681 -17.913  1.00 89.21           H  
ATOM   2742 HG13 ILE A 173     -14.915  15.773 -18.983  1.00 89.21           H  
ATOM   2743  CG2 ILE A 173     -14.179  14.691 -16.627  1.00 89.21           C  
ATOM   2744 HG21 ILE A 173     -13.679  13.940 -16.015  1.00 89.21           H  
ATOM   2745 HG22 ILE A 173     -13.428  15.359 -17.049  1.00 89.21           H  
ATOM   2746 HG23 ILE A 173     -14.854  15.264 -15.990  1.00 89.21           H  
ATOM   2747  CD1 ILE A 173     -16.536  14.586 -19.731  1.00 89.21           C  
ATOM   2748 HD11 ILE A 173     -15.906  14.173 -20.519  1.00 89.21           H  
ATOM   2749 HD12 ILE A 173     -17.108  15.414 -20.150  1.00 89.21           H  
ATOM   2750 HD13 ILE A 173     -17.223  13.818 -19.374  1.00 89.21           H  
ATOM   2751  N   MET A 174     -11.732  13.664 -18.687  1.00 87.49           N  
ATOM   2752  H   MET A 174     -11.648  13.246 -17.771  1.00 87.49           H  
ATOM   2753  CA  MET A 174     -10.512  14.175 -19.325  1.00 87.49           C  
ATOM   2754  HA  MET A 174     -10.674  15.210 -19.627  1.00 87.49           H  
ATOM   2755  C   MET A 174     -10.171  13.368 -20.582  1.00 87.49           C  
ATOM   2756  CB  MET A 174      -9.360  14.128 -18.310  1.00 87.49           C  
ATOM   2757  HB2 MET A 174      -9.194  13.093 -18.010  1.00 87.49           H  
ATOM   2758  HB3 MET A 174      -9.639  14.702 -17.427  1.00 87.49           H  
ATOM   2759  O   MET A 174      -9.944  13.946 -21.643  1.00 87.49           O  
ATOM   2760  CG  MET A 174      -8.046  14.705 -18.847  1.00 87.49           C  
ATOM   2761  HG2 MET A 174      -7.807  14.261 -19.814  1.00 87.49           H  
ATOM   2762  HG3 MET A 174      -8.175  15.778 -18.992  1.00 87.49           H  
ATOM   2763  SD  MET A 174      -6.641  14.436 -17.733  1.00 87.49           S  
ATOM   2764  CE  MET A 174      -6.224  12.722 -18.160  1.00 87.49           C  
ATOM   2765  HE1 MET A 174      -5.358  12.405 -17.578  1.00 87.49           H  
ATOM   2766  HE2 MET A 174      -7.066  12.066 -17.942  1.00 87.49           H  
ATOM   2767  HE3 MET A 174      -5.981  12.660 -19.221  1.00 87.49           H  
ATOM   2768  N   VAL A 175     -10.194  12.036 -20.481  1.00 86.76           N  
ATOM   2769  H   VAL A 175     -10.405  11.622 -19.584  1.00 86.76           H  
ATOM   2770  CA  VAL A 175      -9.976  11.137 -21.620  1.00 86.76           C  
ATOM   2771  HA  VAL A 175      -9.057  11.433 -22.126  1.00 86.76           H  
ATOM   2772  C   VAL A 175     -11.103  11.290 -22.638  1.00 86.76           C  
ATOM   2773  CB  VAL A 175      -9.811   9.680 -21.146  1.00 86.76           C  
ATOM   2774  HB  VAL A 175     -10.644   9.414 -20.496  1.00 86.76           H  
ATOM   2775  O   VAL A 175     -10.816  11.399 -23.825  1.00 86.76           O  
ATOM   2776  CG1 VAL A 175      -9.765   8.673 -22.302  1.00 86.76           C  
ATOM   2777 HG11 VAL A 175     -10.721   8.650 -22.825  1.00 86.76           H  
ATOM   2778 HG12 VAL A 175      -8.975   8.943 -23.002  1.00 86.76           H  
ATOM   2779 HG13 VAL A 175      -9.563   7.680 -21.900  1.00 86.76           H  
ATOM   2780  CG2 VAL A 175      -8.497   9.524 -20.368  1.00 86.76           C  
ATOM   2781 HG21 VAL A 175      -8.473  10.202 -19.514  1.00 86.76           H  
ATOM   2782 HG22 VAL A 175      -8.401   8.503 -19.999  1.00 86.76           H  
ATOM   2783 HG23 VAL A 175      -7.655   9.757 -21.019  1.00 86.76           H  
ATOM   2784  N   LEU A 176     -12.368  11.367 -22.212  1.00 89.06           N  
ATOM   2785  H   LEU A 176     -12.560  11.243 -21.228  1.00 89.06           H  
ATOM   2786  CA  LEU A 176     -13.505  11.562 -23.120  1.00 89.06           C  
ATOM   2787  HA  LEU A 176     -13.484  10.760 -23.858  1.00 89.06           H  
ATOM   2788  C   LEU A 176     -13.418  12.891 -23.894  1.00 89.06           C  
ATOM   2789  CB  LEU A 176     -14.805  11.448 -22.305  1.00 89.06           C  
ATOM   2790  HB2 LEU A 176     -14.799  10.500 -21.767  1.00 89.06           H  
ATOM   2791  HB3 LEU A 176     -14.815  12.253 -21.571  1.00 89.06           H  
ATOM   2792  O   LEU A 176     -13.641  12.898 -25.100  1.00 89.06           O  
ATOM   2793  CG  LEU A 176     -16.098  11.532 -23.136  1.00 89.06           C  
ATOM   2794  HG  LEU A 176     -16.124  12.475 -23.681  1.00 89.06           H  
ATOM   2795  CD1 LEU A 176     -16.236  10.374 -24.126  1.00 89.06           C  
ATOM   2796 HD11 LEU A 176     -17.205  10.425 -24.622  1.00 89.06           H  
ATOM   2797 HD12 LEU A 176     -15.462  10.444 -24.891  1.00 89.06           H  
ATOM   2798 HD13 LEU A 176     -16.153   9.418 -23.608  1.00 89.06           H  
ATOM   2799  CD2 LEU A 176     -17.298  11.499 -22.190  1.00 89.06           C  
ATOM   2800 HD21 LEU A 176     -17.248  12.343 -21.502  1.00 89.06           H  
ATOM   2801 HD22 LEU A 176     -17.293  10.571 -21.619  1.00 89.06           H  
ATOM   2802 HD23 LEU A 176     -18.219  11.576 -22.769  1.00 89.06           H  
ATOM   2803  N   ILE A 177     -13.036  13.994 -23.240  1.00 88.74           N  
ATOM   2804  H   ILE A 177     -12.878  13.932 -22.244  1.00 88.74           H  
ATOM   2805  CA  ILE A 177     -12.824  15.295 -23.897  1.00 88.74           C  
ATOM   2806  HA  ILE A 177     -13.708  15.528 -24.491  1.00 88.74           H  
ATOM   2807  C   ILE A 177     -11.657  15.225 -24.889  1.00 88.74           C  
ATOM   2808  CB  ILE A 177     -12.651  16.419 -22.845  1.00 88.74           C  
ATOM   2809  HB  ILE A 177     -11.959  16.071 -22.077  1.00 88.74           H  
ATOM   2810  O   ILE A 177     -11.808  15.692 -26.014  1.00 88.74           O  
ATOM   2811  CG1 ILE A 177     -14.023  16.720 -22.195  1.00 88.74           C  
ATOM   2812 HG12 ILE A 177     -14.676  17.187 -22.933  1.00 88.74           H  
ATOM   2813 HG13 ILE A 177     -14.494  15.785 -21.892  1.00 88.74           H  
ATOM   2814  CG2 ILE A 177     -12.069  17.709 -23.457  1.00 88.74           C  
ATOM   2815 HG21 ILE A 177     -12.710  18.065 -24.264  1.00 88.74           H  
ATOM   2816 HG22 ILE A 177     -11.973  18.490 -22.702  1.00 88.74           H  
ATOM   2817 HG23 ILE A 177     -11.069  17.530 -23.853  1.00 88.74           H  
ATOM   2818  CD1 ILE A 177     -13.951  17.623 -20.957  1.00 88.74           C  
ATOM   2819 HD11 ILE A 177     -13.255  17.201 -20.231  1.00 88.74           H  
ATOM   2820 HD12 ILE A 177     -13.630  18.628 -21.229  1.00 88.74           H  
ATOM   2821 HD13 ILE A 177     -14.941  17.691 -20.506  1.00 88.74           H  
ATOM   2822  N   ALA A 178     -10.532  14.600 -24.525  1.00 84.67           N  
ATOM   2823  H   ALA A 178     -10.442  14.253 -23.580  1.00 84.67           H  
ATOM   2824  CA  ALA A 178      -9.409  14.408 -25.446  1.00 84.67           C  
ATOM   2825  HA  ALA A 178      -9.094  15.382 -25.820  1.00 84.67           H  
ATOM   2826  C   ALA A 178      -9.800  13.556 -26.671  1.00 84.67           C  
ATOM   2827  CB  ALA A 178      -8.239  13.790 -24.672  1.00 84.67           C  
ATOM   2828  HB1 ALA A 178      -7.385  13.678 -25.339  1.00 84.67           H  
ATOM   2829  HB2 ALA A 178      -7.958  14.440 -23.843  1.00 84.67           H  
ATOM   2830  HB3 ALA A 178      -8.517  12.810 -24.284  1.00 84.67           H  
ATOM   2831  O   ALA A 178      -9.438  13.891 -27.793  1.00 84.67           O  
ATOM   2832  N   SER A 179     -10.604  12.510 -26.463  1.00 84.05           N  
ATOM   2833  H   SER A 179     -10.863  12.314 -25.507  1.00 84.05           H  
ATOM   2834  CA  SER A 179     -11.134  11.634 -27.522  1.00 84.05           C  
ATOM   2835  HA  SER A 179     -10.312  11.210 -28.098  1.00 84.05           H  
ATOM   2836  C   SER A 179     -12.039  12.412 -28.495  1.00 84.05           C  
ATOM   2837  CB  SER A 179     -11.927  10.480 -26.887  1.00 84.05           C  
ATOM   2838  HB2 SER A 179     -12.189   9.754 -27.658  1.00 84.05           H  
ATOM   2839  HB3 SER A 179     -12.852  10.874 -26.465  1.00 84.05           H  
ATOM   2840  O   SER A 179     -11.889  12.345 -29.713  1.00 84.05           O  
ATOM   2841  OG  SER A 179     -11.216   9.811 -25.852  1.00 84.05           O  
ATOM   2842  HG  SER A 179     -11.022  10.457 -25.169  1.00 84.05           H  
ATOM   2843  N   ILE A 180     -12.947  13.236 -27.958  1.00 86.71           N  
ATOM   2844  H   ILE A 180     -13.035  13.262 -26.952  1.00 86.71           H  
ATOM   2845  CA  ILE A 180     -13.824  14.107 -28.757  1.00 86.71           C  
ATOM   2846  HA  ILE A 180     -14.315  13.499 -29.516  1.00 86.71           H  
ATOM   2847  C   ILE A 180     -13.009  15.166 -29.516  1.00 86.71           C  
ATOM   2848  CB  ILE A 180     -14.917  14.718 -27.848  1.00 86.71           C  
ATOM   2849  HB  ILE A 180     -14.435  15.142 -26.968  1.00 86.71           H  
ATOM   2850  O   ILE A 180     -13.291  15.422 -30.684  1.00 86.71           O  
ATOM   2851  CG1 ILE A 180     -15.900  13.609 -27.399  1.00 86.71           C  
ATOM   2852 HG12 ILE A 180     -15.344  12.725 -27.088  1.00 86.71           H  
ATOM   2853 HG13 ILE A 180     -16.524  13.319 -28.245  1.00 86.71           H  
ATOM   2854  CG2 ILE A 180     -15.694  15.845 -28.557  1.00 86.71           C  
ATOM   2855 HG21 ILE A 180     -16.480  16.239 -27.912  1.00 86.71           H  
ATOM   2856 HG22 ILE A 180     -16.139  15.470 -29.478  1.00 86.71           H  
ATOM   2857 HG23 ILE A 180     -15.028  16.673 -28.800  1.00 86.71           H  
ATOM   2858  CD1 ILE A 180     -16.804  14.010 -26.227  1.00 86.71           C  
ATOM   2859 HD11 ILE A 180     -16.195  14.359 -25.393  1.00 86.71           H  
ATOM   2860 HD12 ILE A 180     -17.498  14.796 -26.526  1.00 86.71           H  
ATOM   2861 HD13 ILE A 180     -17.380  13.143 -25.906  1.00 86.71           H  
ATOM   2862  N   ALA A 181     -11.976  15.746 -28.897  1.00 83.13           N  
ATOM   2863  H   ALA A 181     -11.800  15.517 -27.929  1.00 83.13           H  
ATOM   2864  CA  ALA A 181     -11.083  16.705 -29.549  1.00 83.13           C  
ATOM   2865  HA  ALA A 181     -11.691  17.495 -29.990  1.00 83.13           H  
ATOM   2866  C   ALA A 181     -10.265  16.071 -30.691  1.00 83.13           C  
ATOM   2867  CB  ALA A 181     -10.180  17.338 -28.483  1.00 83.13           C  
ATOM   2868  HB1 ALA A 181     -10.790  17.809 -27.712  1.00 83.13           H  
ATOM   2869  HB2 ALA A 181      -9.547  16.577 -28.028  1.00 83.13           H  
ATOM   2870  HB3 ALA A 181      -9.548  18.094 -28.948  1.00 83.13           H  
ATOM   2871  O   ALA A 181     -10.082  16.711 -31.726  1.00 83.13           O  
ATOM   2872  N   VAL A 182      -9.835  14.811 -30.538  1.00 79.08           N  
ATOM   2873  H   VAL A 182      -9.980  14.363 -29.645  1.00 79.08           H  
ATOM   2874  CA  VAL A 182      -9.163  14.031 -31.592  1.00 79.08           C  
ATOM   2875  HA  VAL A 182      -8.284  14.592 -31.910  1.00 79.08           H  
ATOM   2876  C   VAL A 182     -10.060  13.896 -32.826  1.00 79.08           C  
ATOM   2877  CB  VAL A 182      -8.687  12.664 -31.043  1.00 79.08           C  
ATOM   2878  HB  VAL A 182      -9.448  12.264 -30.374  1.00 79.08           H  
ATOM   2879  O   VAL A 182      -9.642  14.250 -33.929  1.00 79.08           O  
ATOM   2880  CG1 VAL A 182      -8.406  11.595 -32.109  1.00 79.08           C  
ATOM   2881 HG11 VAL A 182      -8.042  10.687 -31.628  1.00 79.08           H  
ATOM   2882 HG12 VAL A 182      -9.323  11.340 -32.640  1.00 79.08           H  
ATOM   2883 HG13 VAL A 182      -7.658  11.947 -32.819  1.00 79.08           H  
ATOM   2884  CG2 VAL A 182      -7.393  12.847 -30.239  1.00 79.08           C  
ATOM   2885 HG21 VAL A 182      -7.525  13.620 -29.482  1.00 79.08           H  
ATOM   2886 HG22 VAL A 182      -7.138  11.911 -29.741  1.00 79.08           H  
ATOM   2887 HG23 VAL A 182      -6.578  13.134 -30.902  1.00 79.08           H  
ATOM   2888  N   LEU A 183     -11.317  13.470 -32.655  1.00 80.43           N  
ATOM   2889  H   LEU A 183     -11.616  13.185 -31.733  1.00 80.43           H  
ATOM   2890  CA  LEU A 183     -12.257  13.392 -33.780  1.00 80.43           C  
ATOM   2891  HA  LEU A 183     -11.784  12.834 -34.588  1.00 80.43           H  
ATOM   2892  C   LEU A 183     -12.588  14.772 -34.366  1.00 80.43           C  
ATOM   2893  CB  LEU A 183     -13.547  12.669 -33.364  1.00 80.43           C  
ATOM   2894  HB2 LEU A 183     -14.259  12.782 -34.181  1.00 80.43           H  
ATOM   2895  HB3 LEU A 183     -13.966  13.167 -32.489  1.00 80.43           H  
ATOM   2896  O   LEU A 183     -12.611  14.919 -35.586  1.00 80.43           O  
ATOM   2897  CG  LEU A 183     -13.408  11.167 -33.062  1.00 80.43           C  
ATOM   2898  HG  LEU A 183     -12.841  11.026 -32.141  1.00 80.43           H  
ATOM   2899  CD1 LEU A 183     -14.815  10.600 -32.882  1.00 80.43           C  
ATOM   2900 HD11 LEU A 183     -14.747   9.539 -32.638  1.00 80.43           H  
ATOM   2901 HD12 LEU A 183     -15.381  10.719 -33.805  1.00 80.43           H  
ATOM   2902 HD13 LEU A 183     -15.326  11.126 -32.076  1.00 80.43           H  
ATOM   2903  CD2 LEU A 183     -12.741  10.377 -34.190  1.00 80.43           C  
ATOM   2904 HD21 LEU A 183     -12.804   9.308 -33.986  1.00 80.43           H  
ATOM   2905 HD22 LEU A 183     -13.244  10.582 -35.136  1.00 80.43           H  
ATOM   2906 HD23 LEU A 183     -11.687  10.644 -34.264  1.00 80.43           H  
ATOM   2907  N   ALA A 184     -12.819  15.783 -33.525  1.00 81.54           N  
ATOM   2908  H   ALA A 184     -12.802  15.599 -32.532  1.00 81.54           H  
ATOM   2909  CA  ALA A 184     -13.209  17.119 -33.974  1.00 81.54           C  
ATOM   2910  HA  ALA A 184     -14.090  17.025 -34.609  1.00 81.54           H  
ATOM   2911  C   ALA A 184     -12.118  17.802 -34.816  1.00 81.54           C  
ATOM   2912  CB  ALA A 184     -13.591  17.959 -32.750  1.00 81.54           C  
ATOM   2913  HB1 ALA A 184     -14.406  17.477 -32.211  1.00 81.54           H  
ATOM   2914  HB2 ALA A 184     -12.732  18.066 -32.088  1.00 81.54           H  
ATOM   2915  HB3 ALA A 184     -13.917  18.947 -33.076  1.00 81.54           H  
ATOM   2916  O   ALA A 184     -12.421  18.341 -35.878  1.00 81.54           O  
ATOM   2917  N   ALA A 185     -10.851  17.744 -34.391  1.00 77.77           N  
ATOM   2918  H   ALA A 185     -10.647  17.287 -33.514  1.00 77.77           H  
ATOM   2919  CA  ALA A 185      -9.743  18.328 -35.147  1.00 77.77           C  
ATOM   2920  HA  ALA A 185     -10.031  19.330 -35.465  1.00 77.77           H  
ATOM   2921  C   ALA A 185      -9.420  17.530 -36.425  1.00 77.77           C  
ATOM   2922  CB  ALA A 185      -8.533  18.459 -34.216  1.00 77.77           C  
ATOM   2923  HB1 ALA A 185      -8.789  19.091 -33.366  1.00 77.77           H  
ATOM   2924  HB2 ALA A 185      -8.235  17.476 -33.851  1.00 77.77           H  
ATOM   2925  HB3 ALA A 185      -7.703  18.911 -34.758  1.00 77.77           H  
ATOM   2926  O   ALA A 185      -9.113  18.128 -37.457  1.00 77.77           O  
ATOM   2927  N   GLY A 186      -9.548  16.195 -36.392  1.00 72.49           N  
ATOM   2928  H   GLY A 186      -9.772  15.746 -35.516  1.00 72.49           H  
ATOM   2929  CA  GLY A 186      -9.425  15.354 -37.589  1.00 72.49           C  
ATOM   2930  HA2 GLY A 186      -9.513  14.307 -37.298  1.00 72.49           H  
ATOM   2931  HA3 GLY A 186      -8.450  15.513 -38.050  1.00 72.49           H  
ATOM   2932  C   GLY A 186     -10.510  15.660 -38.627  1.00 72.49           C  
ATOM   2933  O   GLY A 186     -10.215  15.827 -39.808  1.00 72.49           O  
ATOM   2934  N   SER A 187     -11.749  15.866 -38.171  1.00 73.72           N  
ATOM   2935  H   SER A 187     -11.911  15.718 -37.185  1.00 73.72           H  
ATOM   2936  CA  SER A 187     -12.914  16.246 -38.986  1.00 73.72           C  
ATOM   2937  HA  SER A 187     -12.948  15.571 -39.841  1.00 73.72           H  
ATOM   2938  C   SER A 187     -12.860  17.680 -39.553  1.00 73.72           C  
ATOM   2939  CB  SER A 187     -14.192  16.023 -38.167  1.00 73.72           C  
ATOM   2940  HB2 SER A 187     -14.264  16.779 -37.385  1.00 73.72           H  
ATOM   2941  HB3 SER A 187     -14.158  15.037 -37.703  1.00 73.72           H  
ATOM   2942  O   SER A 187     -13.878  18.202 -40.014  1.00 73.72           O  
ATOM   2943  OG  SER A 187     -15.331  16.081 -38.999  1.00 73.72           O  
ATOM   2944  HG  SER A 187     -15.263  16.890 -39.512  1.00 73.72           H  
ATOM   2945  N   GLN A 188     -11.696  18.335 -39.521  1.00 70.24           N  
ATOM   2946  H   GLN A 188     -10.919  17.872 -39.072  1.00 70.24           H  
ATOM   2947  CA  GLN A 188     -11.440  19.650 -40.118  1.00 70.24           C  
ATOM   2948  HA  GLN A 188     -12.291  19.937 -40.736  1.00 70.24           H  
ATOM   2949  C   GLN A 188     -10.237  19.649 -41.082  1.00 70.24           C  
ATOM   2950  CB  GLN A 188     -11.284  20.699 -38.999  1.00 70.24           C  
ATOM   2951  HB2 GLN A 188     -10.469  20.391 -38.344  1.00 70.24           H  
ATOM   2952  HB3 GLN A 188     -11.015  21.659 -39.438  1.00 70.24           H  
ATOM   2953  O   GLN A 188      -9.850  20.712 -41.556  1.00 70.24           O  
ATOM   2954  CG  GLN A 188     -12.545  20.914 -38.143  1.00 70.24           C  
ATOM   2955  HG2 GLN A 188     -12.272  21.501 -37.267  1.00 70.24           H  
ATOM   2956  HG3 GLN A 188     -12.938  19.960 -37.793  1.00 70.24           H  
ATOM   2957  CD  GLN A 188     -13.645  21.664 -38.887  1.00 70.24           C  
ATOM   2958  NE2 GLN A 188     -14.455  21.003 -39.683  1.00 70.24           N  
ATOM   2959 HE21 GLN A 188     -14.348  20.007 -39.818  1.00 70.24           H  
ATOM   2960 HE22 GLN A 188     -15.145  21.551 -40.177  1.00 70.24           H  
ATOM   2961  OE1 GLN A 188     -13.791  22.867 -38.767  1.00 70.24           O  
ATOM   2962  N   GLY A 189      -9.613  18.496 -41.365  1.00 66.10           N  
ATOM   2963  H   GLY A 189      -9.948  17.653 -40.922  1.00 66.10           H  
ATOM   2964  CA  GLY A 189      -8.579  18.335 -42.407  1.00 66.10           C  
ATOM   2965  HA2 GLY A 189      -8.354  17.273 -42.508  1.00 66.10           H  
ATOM   2966  HA3 GLY A 189      -8.992  18.679 -43.355  1.00 66.10           H  
ATOM   2967  C   GLY A 189      -7.245  19.073 -42.197  1.00 66.10           C  
ATOM   2968  O   GLY A 189      -6.312  18.873 -42.970  1.00 66.10           O  
ATOM   2969  N   ASN A 190      -7.128  19.910 -41.162  1.00 67.19           N  
ATOM   2970  H   ASN A 190      -7.973  20.086 -40.636  1.00 67.19           H  
ATOM   2971  CA  ASN A 190      -5.962  20.750 -40.892  1.00 67.19           C  
ATOM   2972  HA  ASN A 190      -5.849  21.460 -41.710  1.00 67.19           H  
ATOM   2973  C   ASN A 190      -4.665  19.930 -40.795  1.00 67.19           C  
ATOM   2974  CB  ASN A 190      -6.208  21.537 -39.591  1.00 67.19           C  
ATOM   2975  HB2 ASN A 190      -5.256  21.905 -39.208  1.00 67.19           H  
ATOM   2976  HB3 ASN A 190      -6.646  20.891 -38.830  1.00 67.19           H  
ATOM   2977  O   ASN A 190      -4.480  19.159 -39.854  1.00 67.19           O  
ATOM   2978  CG  ASN A 190      -7.081  22.752 -39.822  1.00 67.19           C  
ATOM   2979  ND2 ASN A 190      -8.346  22.704 -39.482  1.00 67.19           N  
ATOM   2980 HD21 ASN A 190      -8.768  21.855 -39.133  1.00 67.19           H  
ATOM   2981 HD22 ASN A 190      -8.896  23.511 -39.743  1.00 67.19           H  
ATOM   2982  OD1 ASN A 190      -6.623  23.757 -40.326  1.00 67.19           O  
ATOM   2983  N   VAL A 191      -3.720  20.153 -41.717  1.00 65.59           N  
ATOM   2984  H   VAL A 191      -3.961  20.737 -42.504  1.00 65.59           H  
ATOM   2985  CA  VAL A 191      -2.455  19.392 -41.780  1.00 65.59           C  
ATOM   2986  HA  VAL A 191      -2.706  18.340 -41.919  1.00 65.59           H  
ATOM   2987  C   VAL A 191      -1.664  19.500 -40.472  1.00 65.59           C  
ATOM   2988  CB  VAL A 191      -1.598  19.822 -42.988  1.00 65.59           C  
ATOM   2989  HB  VAL A 191      -1.307  20.866 -42.867  1.00 65.59           H  
ATOM   2990  O   VAL A 191      -1.208  18.479 -39.958  1.00 65.59           O  
ATOM   2991  CG1 VAL A 191      -0.328  18.969 -43.111  1.00 65.59           C  
ATOM   2992 HG11 VAL A 191       0.236  19.272 -43.992  1.00 65.59           H  
ATOM   2993 HG12 VAL A 191      -0.589  17.915 -43.203  1.00 65.59           H  
ATOM   2994 HG13 VAL A 191       0.313  19.106 -42.240  1.00 65.59           H  
ATOM   2995  CG2 VAL A 191      -2.379  19.680 -44.302  1.00 65.59           C  
ATOM   2996 HG21 VAL A 191      -2.730  18.655 -44.421  1.00 65.59           H  
ATOM   2997 HG22 VAL A 191      -3.236  20.354 -44.319  1.00 65.59           H  
ATOM   2998 HG23 VAL A 191      -1.737  19.934 -45.145  1.00 65.59           H  
ATOM   2999  N   PHE A 192      -1.605  20.696 -39.871  1.00 65.31           N  
ATOM   3000  H   PHE A 192      -2.013  21.485 -40.351  1.00 65.31           H  
ATOM   3001  CA  PHE A 192      -0.985  20.941 -38.558  1.00 65.31           C  
ATOM   3002  HA  PHE A 192       0.048  20.594 -38.593  1.00 65.31           H  
ATOM   3003  C   PHE A 192      -1.644  20.186 -37.392  1.00 65.31           C  
ATOM   3004  CB  PHE A 192      -0.975  22.451 -38.267  1.00 65.31           C  
ATOM   3005  HB2 PHE A 192      -1.880  22.917 -38.658  1.00 65.31           H  
ATOM   3006  HB3 PHE A 192      -0.986  22.606 -37.188  1.00 65.31           H  
ATOM   3007  O   PHE A 192      -1.005  19.997 -36.359  1.00 65.31           O  
ATOM   3008  CG  PHE A 192       0.250  23.162 -38.804  1.00 65.31           C  
ATOM   3009  CD1 PHE A 192       1.445  23.135 -38.059  1.00 65.31           C  
ATOM   3010  HD1 PHE A 192       1.481  22.619 -37.111  1.00 65.31           H  
ATOM   3011  CD2 PHE A 192       0.208  23.842 -40.036  1.00 65.31           C  
ATOM   3012  HD2 PHE A 192      -0.705  23.878 -40.610  1.00 65.31           H  
ATOM   3013  CE1 PHE A 192       2.595  23.783 -38.543  1.00 65.31           C  
ATOM   3014  HE1 PHE A 192       3.510  23.765 -37.971  1.00 65.31           H  
ATOM   3015  CE2 PHE A 192       1.360  24.488 -40.520  1.00 65.31           C  
ATOM   3016  HE2 PHE A 192       1.330  25.014 -41.463  1.00 65.31           H  
ATOM   3017  CZ  PHE A 192       2.552  24.458 -39.775  1.00 65.31           C  
ATOM   3018  HZ  PHE A 192       3.434  24.957 -40.148  1.00 65.31           H  
ATOM   3019  N   ALA A 193      -2.889  19.721 -37.537  1.00 62.08           N  
ATOM   3020  H   ALA A 193      -3.366  19.846 -38.419  1.00 62.08           H  
ATOM   3021  CA  ALA A 193      -3.504  18.837 -36.555  1.00 62.08           C  
ATOM   3022  HA  ALA A 193      -3.188  19.149 -35.559  1.00 62.08           H  
ATOM   3023  C   ALA A 193      -3.049  17.380 -36.735  1.00 62.08           C  
ATOM   3024  CB  ALA A 193      -5.031  18.978 -36.615  1.00 62.08           C  
ATOM   3025  HB1 ALA A 193      -5.475  18.411 -35.798  1.00 62.08           H  
ATOM   3026  HB2 ALA A 193      -5.312  20.026 -36.512  1.00 62.08           H  
ATOM   3027  HB3 ALA A 193      -5.416  18.589 -37.557  1.00 62.08           H  
ATOM   3028  O   ALA A 193      -2.937  16.671 -35.743  1.00 62.08           O  
ATOM   3029  N   THR A 194      -2.754  16.905 -37.952  1.00 64.48           N  
ATOM   3030  H   THR A 194      -2.770  17.542 -38.736  1.00 64.48           H  
ATOM   3031  CA  THR A 194      -2.523  15.464 -38.210  1.00 64.48           C  
ATOM   3032  HA  THR A 194      -3.382  14.920 -37.819  1.00 64.48           H  
ATOM   3033  C   THR A 194      -1.294  14.893 -37.492  1.00 64.48           C  
ATOM   3034  CB  THR A 194      -2.448  15.123 -39.707  1.00 64.48           C  
ATOM   3035  HB  THR A 194      -2.438  14.037 -39.797  1.00 64.48           H  
ATOM   3036  O   THR A 194      -1.310  13.736 -37.067  1.00 64.48           O  
ATOM   3037  CG2 THR A 194      -3.635  15.649 -40.511  1.00 64.48           C  
ATOM   3038 HG21 THR A 194      -4.567  15.280 -40.081  1.00 64.48           H  
ATOM   3039 HG22 THR A 194      -3.647  16.739 -40.511  1.00 64.48           H  
ATOM   3040 HG23 THR A 194      -3.560  15.295 -41.539  1.00 64.48           H  
ATOM   3041  OG1 THR A 194      -1.273  15.618 -40.299  1.00 64.48           O  
ATOM   3042  HG1 THR A 194      -1.398  16.547 -40.508  1.00 64.48           H  
ATOM   3043  N   SER A 195      -0.261  15.710 -37.270  1.00 68.94           N  
ATOM   3044  H   SER A 195      -0.309  16.648 -37.641  1.00 68.94           H  
ATOM   3045  CA  SER A 195       0.913  15.365 -36.458  1.00 68.94           C  
ATOM   3046  HA  SER A 195       1.316  14.414 -36.806  1.00 68.94           H  
ATOM   3047  C   SER A 195       0.549  15.198 -34.977  1.00 68.94           C  
ATOM   3048  CB  SER A 195       1.993  16.438 -36.650  1.00 68.94           C  
ATOM   3049  HB2 SER A 195       2.346  16.404 -37.681  1.00 68.94           H  
ATOM   3050  HB3 SER A 195       2.831  16.242 -35.982  1.00 68.94           H  
ATOM   3051  O   SER A 195       0.816  14.149 -34.387  1.00 68.94           O  
ATOM   3052  OG  SER A 195       1.452  17.720 -36.390  1.00 68.94           O  
ATOM   3053  HG  SER A 195       2.089  18.394 -36.636  1.00 68.94           H  
ATOM   3054  N   ALA A 196      -0.147  16.180 -34.396  1.00 67.28           N  
ATOM   3055  H   ALA A 196      -0.314  17.016 -34.937  1.00 67.28           H  
ATOM   3056  CA  ALA A 196      -0.665  16.113 -33.030  1.00 67.28           C  
ATOM   3057  HA  ALA A 196       0.165  15.921 -32.351  1.00 67.28           H  
ATOM   3058  C   ALA A 196      -1.679  14.967 -32.850  1.00 67.28           C  
ATOM   3059  CB  ALA A 196      -1.276  17.475 -32.675  1.00 67.28           C  
ATOM   3060  HB1 ALA A 196      -2.113  17.696 -33.337  1.00 67.28           H  
ATOM   3061  HB2 ALA A 196      -1.631  17.458 -31.645  1.00 67.28           H  
ATOM   3062  HB3 ALA A 196      -0.523  18.257 -32.779  1.00 67.28           H  
ATOM   3063  O   ALA A 196      -1.675  14.288 -31.832  1.00 67.28           O  
ATOM   3064  N   LEU A 197      -2.509  14.680 -33.853  1.00 66.70           N  
ATOM   3065  H   LEU A 197      -2.499  15.296 -34.654  1.00 66.70           H  
ATOM   3066  CA  LEU A 197      -3.478  13.580 -33.841  1.00 66.70           C  
ATOM   3067  HA  LEU A 197      -4.028  13.611 -32.900  1.00 66.70           H  
ATOM   3068  C   LEU A 197      -2.823  12.191 -33.897  1.00 66.70           C  
ATOM   3069  CB  LEU A 197      -4.467  13.774 -35.003  1.00 66.70           C  
ATOM   3070  HB2 LEU A 197      -3.894  13.905 -35.921  1.00 66.70           H  
ATOM   3071  HB3 LEU A 197      -5.064  12.869 -35.118  1.00 66.70           H  
ATOM   3072  O   LEU A 197      -3.449  11.216 -33.480  1.00 66.70           O  
ATOM   3073  CG  LEU A 197      -5.423  14.967 -34.817  1.00 66.70           C  
ATOM   3074  HG  LEU A 197      -4.877  15.857 -34.504  1.00 66.70           H  
ATOM   3075  CD1 LEU A 197      -6.151  15.270 -36.124  1.00 66.70           C  
ATOM   3076 HD11 LEU A 197      -6.797  16.138 -35.987  1.00 66.70           H  
ATOM   3077 HD12 LEU A 197      -6.752  14.412 -36.427  1.00 66.70           H  
ATOM   3078 HD13 LEU A 197      -5.430  15.503 -36.908  1.00 66.70           H  
ATOM   3079  CD2 LEU A 197      -6.468  14.673 -33.751  1.00 66.70           C  
ATOM   3080 HD21 LEU A 197      -7.155  15.516 -33.677  1.00 66.70           H  
ATOM   3081 HD22 LEU A 197      -5.993  14.528 -32.781  1.00 66.70           H  
ATOM   3082 HD23 LEU A 197      -7.032  13.783 -34.028  1.00 66.70           H  
ATOM   3083  N   ARG A 198      -1.569  12.077 -34.359  1.00 67.54           N  
ATOM   3084  H   ARG A 198      -1.124  12.901 -34.736  1.00 67.54           H  
ATOM   3085  CA  ARG A 198      -0.791  10.831 -34.260  1.00 67.54           C  
ATOM   3086  HA  ARG A 198      -1.483   9.995 -34.363  1.00 67.54           H  
ATOM   3087  C   ARG A 198      -0.169  10.658 -32.869  1.00 67.54           C  
ATOM   3088  CB  ARG A 198       0.204  10.727 -35.433  1.00 67.54           C  
ATOM   3089  HB2 ARG A 198       1.001  11.459 -35.302  1.00 67.54           H  
ATOM   3090  HB3 ARG A 198      -0.336  10.964 -36.350  1.00 67.54           H  
ATOM   3091  O   ARG A 198      -0.197   9.549 -32.349  1.00 67.54           O  
ATOM   3092  CG  ARG A 198       0.814   9.316 -35.576  1.00 67.54           C  
ATOM   3093  HG2 ARG A 198       1.415   9.118 -34.688  1.00 67.54           H  
ATOM   3094  HG3 ARG A 198       0.021   8.569 -35.612  1.00 67.54           H  
ATOM   3095  CD  ARG A 198       1.728   9.143 -36.808  1.00 67.54           C  
ATOM   3096  HD2 ARG A 198       2.224  10.085 -37.041  1.00 67.54           H  
ATOM   3097  HD3 ARG A 198       2.508   8.429 -36.543  1.00 67.54           H  
ATOM   3098  NE  ARG A 198       1.042   8.608 -38.008  1.00 67.54           N  
ATOM   3099  HE  ARG A 198       1.125   7.620 -38.202  1.00 67.54           H  
ATOM   3100  NH1 ARG A 198       0.191  10.545 -38.938  1.00 67.54           N  
ATOM   3101 HH11 ARG A 198       0.505  11.084 -38.143  1.00 67.54           H  
ATOM   3102 HH12 ARG A 198      -0.280  10.972 -39.723  1.00 67.54           H  
ATOM   3103  NH2 ARG A 198      -0.034   8.604 -39.988  1.00 67.54           N  
ATOM   3104 HH21 ARG A 198      -0.740   8.949 -40.621  1.00 67.54           H  
ATOM   3105 HH22 ARG A 198       0.169   7.614 -40.011  1.00 67.54           H  
ATOM   3106  CZ  ARG A 198       0.406   9.258 -38.965  1.00 67.54           C  
ATOM   3107  N   SER A 199       0.296  11.727 -32.212  1.00 70.39           N  
ATOM   3108  H   SER A 199       0.280  12.628 -32.668  1.00 70.39           H  
ATOM   3109  CA  SER A 199       0.822  11.648 -30.833  1.00 70.39           C  
ATOM   3110  HA  SER A 199       1.386  10.720 -30.743  1.00 70.39           H  
ATOM   3111  C   SER A 199      -0.270  11.587 -29.752  1.00 70.39           C  
ATOM   3112  CB  SER A 199       1.812  12.785 -30.563  1.00 70.39           C  
ATOM   3113  HB2 SER A 199       2.221  12.674 -29.559  1.00 70.39           H  
ATOM   3114  HB3 SER A 199       2.629  12.720 -31.282  1.00 70.39           H  
ATOM   3115  O   SER A 199      -0.102  10.900 -28.746  1.00 70.39           O  
ATOM   3116  OG  SER A 199       1.190  14.047 -30.681  1.00 70.39           O  
ATOM   3117  HG  SER A 199       1.863  14.728 -30.616  1.00 70.39           H  
ATOM   3118  N   LEU A 200      -1.439  12.199 -29.972  1.00 70.04           N  
ATOM   3119  H   LEU A 200      -1.493  12.826 -30.762  1.00 70.04           H  
ATOM   3120  CA  LEU A 200      -2.603  12.105 -29.077  1.00 70.04           C  
ATOM   3121  HA  LEU A 200      -2.285  12.408 -28.079  1.00 70.04           H  
ATOM   3122  C   LEU A 200      -3.138  10.667 -28.927  1.00 70.04           C  
ATOM   3123  CB  LEU A 200      -3.712  13.063 -29.560  1.00 70.04           C  
ATOM   3124  HB2 LEU A 200      -4.654  12.779 -29.090  1.00 70.04           H  
ATOM   3125  HB3 LEU A 200      -3.835  12.932 -30.635  1.00 70.04           H  
ATOM   3126  O   LEU A 200      -3.830  10.386 -27.947  1.00 70.04           O  
ATOM   3127  CG  LEU A 200      -3.455  14.552 -29.247  1.00 70.04           C  
ATOM   3128  HG  LEU A 200      -2.431  14.821 -29.506  1.00 70.04           H  
ATOM   3129  CD1 LEU A 200      -4.416  15.436 -30.045  1.00 70.04           C  
ATOM   3130 HD11 LEU A 200      -4.221  16.485 -29.826  1.00 70.04           H  
ATOM   3131 HD12 LEU A 200      -4.256  15.274 -31.111  1.00 70.04           H  
ATOM   3132 HD13 LEU A 200      -5.450  15.198 -29.793  1.00 70.04           H  
ATOM   3133  CD2 LEU A 200      -3.667  14.873 -27.766  1.00 70.04           C  
ATOM   3134 HD21 LEU A 200      -3.476  15.932 -27.594  1.00 70.04           H  
ATOM   3135 HD22 LEU A 200      -4.693  14.641 -27.479  1.00 70.04           H  
ATOM   3136 HD23 LEU A 200      -2.970  14.295 -27.160  1.00 70.04           H  
ATOM   3137  N   ARG A 201      -2.766   9.732 -29.816  1.00 68.96           N  
ATOM   3138  H   ARG A 201      -2.186  10.026 -30.589  1.00 68.96           H  
ATOM   3139  CA  ARG A 201      -3.074   8.293 -29.683  1.00 68.96           C  
ATOM   3140  HA  ARG A 201      -4.155   8.163 -29.652  1.00 68.96           H  
ATOM   3141  C   ARG A 201      -2.540   7.703 -28.377  1.00 68.96           C  
ATOM   3142  CB  ARG A 201      -2.536   7.501 -30.889  1.00 68.96           C  
ATOM   3143  HB2 ARG A 201      -2.782   6.449 -30.750  1.00 68.96           H  
ATOM   3144  HB3 ARG A 201      -1.452   7.602 -30.943  1.00 68.96           H  
ATOM   3145  O   ARG A 201      -3.218   6.888 -27.759  1.00 68.96           O  
ATOM   3146  CG  ARG A 201      -3.166   7.975 -32.205  1.00 68.96           C  
ATOM   3147  HG2 ARG A 201      -4.250   7.875 -32.143  1.00 68.96           H  
ATOM   3148  HG3 ARG A 201      -2.922   9.028 -32.341  1.00 68.96           H  
ATOM   3149  CD  ARG A 201      -2.665   7.208 -33.433  1.00 68.96           C  
ATOM   3150  HD2 ARG A 201      -3.073   6.197 -33.422  1.00 68.96           H  
ATOM   3151  HD3 ARG A 201      -1.577   7.152 -33.402  1.00 68.96           H  
ATOM   3152  NE  ARG A 201      -3.084   7.920 -34.651  1.00 68.96           N  
ATOM   3153  HE  ARG A 201      -3.610   8.770 -34.509  1.00 68.96           H  
ATOM   3154  NH1 ARG A 201      -2.078   6.597 -36.267  1.00 68.96           N  
ATOM   3155 HH11 ARG A 201      -1.857   5.844 -35.631  1.00 68.96           H  
ATOM   3156 HH12 ARG A 201      -1.907   6.474 -37.254  1.00 68.96           H  
ATOM   3157  NH2 ARG A 201      -3.101   8.461 -36.845  1.00 68.96           N  
ATOM   3158 HH21 ARG A 201      -2.890   8.147 -37.781  1.00 68.96           H  
ATOM   3159 HH22 ARG A 201      -3.708   9.254 -36.690  1.00 68.96           H  
ATOM   3160  CZ  ARG A 201      -2.754   7.643 -35.899  1.00 68.96           C  
ATOM   3161  N   PHE A 202      -1.414   8.197 -27.852  1.00 70.61           N  
ATOM   3162  H   PHE A 202      -0.896   8.894 -28.369  1.00 70.61           H  
ATOM   3163  CA  PHE A 202      -0.913   7.772 -26.539  1.00 70.61           C  
ATOM   3164  HA  PHE A 202      -0.816   6.687 -26.555  1.00 70.61           H  
ATOM   3165  C   PHE A 202      -1.885   8.091 -25.383  1.00 70.61           C  
ATOM   3166  CB  PHE A 202       0.484   8.364 -26.295  1.00 70.61           C  
ATOM   3167  HB2 PHE A 202       0.802   8.095 -25.287  1.00 70.61           H  
ATOM   3168  HB3 PHE A 202       0.422   9.451 -26.339  1.00 70.61           H  
ATOM   3169  O   PHE A 202      -1.876   7.394 -24.369  1.00 70.61           O  
ATOM   3170  CG  PHE A 202       1.550   7.869 -27.261  1.00 70.61           C  
ATOM   3171  CD1 PHE A 202       1.862   6.497 -27.325  1.00 70.61           C  
ATOM   3172  HD1 PHE A 202       1.355   5.793 -26.682  1.00 70.61           H  
ATOM   3173  CD2 PHE A 202       2.241   8.773 -28.093  1.00 70.61           C  
ATOM   3174  HD2 PHE A 202       2.034   9.831 -28.035  1.00 70.61           H  
ATOM   3175  CE1 PHE A 202       2.835   6.030 -28.227  1.00 70.61           C  
ATOM   3176  HE1 PHE A 202       3.067   4.976 -28.278  1.00 70.61           H  
ATOM   3177  CE2 PHE A 202       3.212   8.306 -28.997  1.00 70.61           C  
ATOM   3178  HE2 PHE A 202       3.739   9.000 -29.635  1.00 70.61           H  
ATOM   3179  CZ  PHE A 202       3.507   6.933 -29.067  1.00 70.61           C  
ATOM   3180  HZ  PHE A 202       4.253   6.574 -29.760  1.00 70.61           H  
ATOM   3181  N   LEU A 203      -2.804   9.058 -25.535  1.00 69.78           N  
ATOM   3182  H   LEU A 203      -2.837   9.567 -26.406  1.00 69.78           H  
ATOM   3183  CA  LEU A 203      -3.866   9.301 -24.548  1.00 69.78           C  
ATOM   3184  HA  LEU A 203      -3.413   9.272 -23.557  1.00 69.78           H  
ATOM   3185  C   LEU A 203      -4.954   8.212 -24.552  1.00 69.78           C  
ATOM   3186  CB  LEU A 203      -4.492  10.695 -24.734  1.00 69.78           C  
ATOM   3187  HB2 LEU A 203      -5.041  10.711 -25.675  1.00 69.78           H  
ATOM   3188  HB3 LEU A 203      -5.218  10.839 -23.934  1.00 69.78           H  
ATOM   3189  O   LEU A 203      -5.650   8.056 -23.547  1.00 69.78           O  
ATOM   3190  CG  LEU A 203      -3.514  11.885 -24.717  1.00 69.78           C  
ATOM   3191  HG  LEU A 203      -2.877  11.846 -25.601  1.00 69.78           H  
ATOM   3192  CD1 LEU A 203      -4.322  13.182 -24.748  1.00 69.78           C  
ATOM   3193 HD11 LEU A 203      -4.955  13.188 -25.636  1.00 69.78           H  
ATOM   3194 HD12 LEU A 203      -4.948  13.263 -23.859  1.00 69.78           H  
ATOM   3195 HD13 LEU A 203      -3.647  14.036 -24.792  1.00 69.78           H  
ATOM   3196  CD2 LEU A 203      -2.627  11.926 -23.470  1.00 69.78           C  
ATOM   3197 HD21 LEU A 203      -1.990  12.810 -23.506  1.00 69.78           H  
ATOM   3198 HD22 LEU A 203      -1.981  11.048 -23.442  1.00 69.78           H  
ATOM   3199 HD23 LEU A 203      -3.244  11.963 -22.572  1.00 69.78           H  
ATOM   3200  N   GLN A 204      -5.077   7.403 -25.612  1.00 72.21           N  
ATOM   3201  H   GLN A 204      -4.465   7.533 -26.405  1.00 72.21           H  
ATOM   3202  CA  GLN A 204      -5.955   6.226 -25.612  1.00 72.21           C  
ATOM   3203  HA  GLN A 204      -6.956   6.548 -25.326  1.00 72.21           H  
ATOM   3204  C   GLN A 204      -5.491   5.189 -24.573  1.00 72.21           C  
ATOM   3205  CB  GLN A 204      -6.047   5.587 -27.012  1.00 72.21           C  
ATOM   3206  HB2 GLN A 204      -5.063   5.215 -27.298  1.00 72.21           H  
ATOM   3207  HB3 GLN A 204      -6.713   4.726 -26.950  1.00 72.21           H  
ATOM   3208  O   GLN A 204      -6.330   4.510 -23.985  1.00 72.21           O  
ATOM   3209  CG  GLN A 204      -6.587   6.525 -28.111  1.00 72.21           C  
ATOM   3210  HG2 GLN A 204      -5.955   7.410 -28.191  1.00 72.21           H  
ATOM   3211  HG3 GLN A 204      -7.592   6.854 -27.849  1.00 72.21           H  
ATOM   3212  CD  GLN A 204      -6.612   5.841 -29.480  1.00 72.21           C  
ATOM   3213  NE2 GLN A 204      -7.671   5.923 -30.251  1.00 72.21           N  
ATOM   3214 HE21 GLN A 204      -8.511   6.425 -30.000  1.00 72.21           H  
ATOM   3215 HE22 GLN A 204      -7.617   5.438 -31.135  1.00 72.21           H  
ATOM   3216  OE1 GLN A 204      -5.668   5.196 -29.889  1.00 72.21           O  
ATOM   3217  N   ILE A 205      -4.192   5.121 -24.245  1.00 77.51           N  
ATOM   3218  H   ILE A 205      -3.544   5.715 -24.742  1.00 77.51           H  
ATOM   3219  CA  ILE A 205      -3.651   4.223 -23.204  1.00 77.51           C  
ATOM   3220  HA  ILE A 205      -3.962   3.205 -23.440  1.00 77.51           H  
ATOM   3221  C   ILE A 205      -4.233   4.563 -21.819  1.00 77.51           C  
ATOM   3222  CB  ILE A 205      -2.100   4.254 -23.203  1.00 77.51           C  
ATOM   3223  HB  ILE A 205      -1.774   5.260 -22.941  1.00 77.51           H  
ATOM   3224  O   ILE A 205      -4.500   3.669 -21.013  1.00 77.51           O  
ATOM   3225  CG1 ILE A 205      -1.541   3.899 -24.605  1.00 77.51           C  
ATOM   3226 HG12 ILE A 205      -1.967   4.571 -25.350  1.00 77.51           H  
ATOM   3227 HG13 ILE A 205      -1.837   2.883 -24.865  1.00 77.51           H  
ATOM   3228  CG2 ILE A 205      -1.535   3.286 -22.143  1.00 77.51           C  
ATOM   3229 HG21 ILE A 205      -1.882   3.555 -21.145  1.00 77.51           H  
ATOM   3230 HG22 ILE A 205      -0.447   3.338 -22.121  1.00 77.51           H  
ATOM   3231 HG23 ILE A 205      -1.839   2.264 -22.366  1.00 77.51           H  
ATOM   3232  CD1 ILE A 205      -0.017   4.017 -24.736  1.00 77.51           C  
ATOM   3233 HD11 ILE A 205       0.308   5.008 -24.419  1.00 77.51           H  
ATOM   3234 HD12 ILE A 205       0.261   3.868 -25.780  1.00 77.51           H  
ATOM   3235 HD13 ILE A 205       0.484   3.254 -24.140  1.00 77.51           H  
ATOM   3236  N   LEU A 206      -4.557   5.837 -21.558  1.00 79.42           N  
ATOM   3237  H   LEU A 206      -4.383   6.526 -22.275  1.00 79.42           H  
ATOM   3238  CA  LEU A 206      -5.196   6.271 -20.307  1.00 79.42           C  
ATOM   3239  HA  LEU A 206      -4.571   5.942 -19.476  1.00 79.42           H  
ATOM   3240  C   LEU A 206      -6.585   5.634 -20.093  1.00 79.42           C  
ATOM   3241  CB  LEU A 206      -5.294   7.806 -20.264  1.00 79.42           C  
ATOM   3242  HB2 LEU A 206      -5.715   8.094 -19.301  1.00 79.42           H  
ATOM   3243  HB3 LEU A 206      -5.997   8.119 -21.037  1.00 79.42           H  
ATOM   3244  O   LEU A 206      -7.062   5.568 -18.958  1.00 79.42           O  
ATOM   3245  CG  LEU A 206      -3.975   8.575 -20.470  1.00 79.42           C  
ATOM   3246  HG  LEU A 206      -3.553   8.326 -21.444  1.00 79.42           H  
ATOM   3247  CD1 LEU A 206      -4.259  10.077 -20.435  1.00 79.42           C  
ATOM   3248 HD11 LEU A 206      -3.328  10.625 -20.582  1.00 79.42           H  
ATOM   3249 HD12 LEU A 206      -4.947  10.335 -21.240  1.00 79.42           H  
ATOM   3250 HD13 LEU A 206      -4.693  10.357 -19.476  1.00 79.42           H  
ATOM   3251  CD2 LEU A 206      -2.937   8.264 -19.391  1.00 79.42           C  
ATOM   3252 HD21 LEU A 206      -3.328   8.515 -18.405  1.00 79.42           H  
ATOM   3253 HD22 LEU A 206      -2.665   7.210 -19.428  1.00 79.42           H  
ATOM   3254 HD23 LEU A 206      -2.036   8.848 -19.577  1.00 79.42           H  
ATOM   3255  N   ARG A 207      -7.216   5.087 -21.144  1.00 78.61           N  
ATOM   3256  H   ARG A 207      -6.757   5.136 -22.042  1.00 78.61           H  
ATOM   3257  CA  ARG A 207      -8.453   4.291 -21.040  1.00 78.61           C  
ATOM   3258  HA  ARG A 207      -9.205   4.881 -20.516  1.00 78.61           H  
ATOM   3259  C   ARG A 207      -8.255   3.018 -20.213  1.00 78.61           C  
ATOM   3260  CB  ARG A 207      -8.989   3.937 -22.440  1.00 78.61           C  
ATOM   3261  HB2 ARG A 207      -9.887   3.328 -22.325  1.00 78.61           H  
ATOM   3262  HB3 ARG A 207      -8.247   3.340 -22.970  1.00 78.61           H  
ATOM   3263  O   ARG A 207      -9.210   2.564 -19.591  1.00 78.61           O  
ATOM   3264  CG  ARG A 207      -9.359   5.176 -23.267  1.00 78.61           C  
ATOM   3265  HG2 ARG A 207      -8.549   5.904 -23.230  1.00 78.61           H  
ATOM   3266  HG3 ARG A 207     -10.252   5.625 -22.831  1.00 78.61           H  
ATOM   3267  CD  ARG A 207      -9.632   4.860 -24.741  1.00 78.61           C  
ATOM   3268  HD2 ARG A 207     -10.415   4.106 -24.823  1.00 78.61           H  
ATOM   3269  HD3 ARG A 207      -8.722   4.468 -25.195  1.00 78.61           H  
ATOM   3270  NE  ARG A 207     -10.044   6.089 -25.434  1.00 78.61           N  
ATOM   3271  HE  ARG A 207     -10.184   6.922 -24.880  1.00 78.61           H  
ATOM   3272  NH1 ARG A 207      -9.994   5.378 -27.636  1.00 78.61           N  
ATOM   3273 HH11 ARG A 207      -9.804   4.407 -27.436  1.00 78.61           H  
ATOM   3274 HH12 ARG A 207     -10.128   5.682 -28.590  1.00 78.61           H  
ATOM   3275  NH2 ARG A 207     -10.389   7.485 -27.156  1.00 78.61           N  
ATOM   3276 HH21 ARG A 207     -10.446   7.661 -28.149  1.00 78.61           H  
ATOM   3277 HH22 ARG A 207     -10.605   8.274 -26.565  1.00 78.61           H  
ATOM   3278  CZ  ARG A 207     -10.150   6.292 -26.732  1.00 78.61           C  
ATOM   3279  N   MET A 208      -7.036   2.481 -20.116  1.00 79.18           N  
ATOM   3280  H   MET A 208      -6.282   2.899 -20.641  1.00 79.18           H  
ATOM   3281  CA  MET A 208      -6.723   1.343 -19.242  1.00 79.18           C  
ATOM   3282  HA  MET A 208      -7.450   0.554 -19.433  1.00 79.18           H  
ATOM   3283  C   MET A 208      -6.822   1.715 -17.749  1.00 79.18           C  
ATOM   3284  CB  MET A 208      -5.330   0.812 -19.614  1.00 79.18           C  
ATOM   3285  HB2 MET A 208      -5.255   0.743 -20.699  1.00 79.18           H  
ATOM   3286  HB3 MET A 208      -4.564   1.502 -19.260  1.00 79.18           H  
ATOM   3287  O   MET A 208      -7.269   0.911 -16.932  1.00 79.18           O  
ATOM   3288  CG  MET A 208      -5.065  -0.581 -19.039  1.00 79.18           C  
ATOM   3289  HG2 MET A 208      -5.093  -0.537 -17.950  1.00 79.18           H  
ATOM   3290  HG3 MET A 208      -5.849  -1.257 -19.381  1.00 79.18           H  
ATOM   3291  SD  MET A 208      -3.464  -1.254 -19.552  1.00 79.18           S  
ATOM   3292  CE  MET A 208      -3.583  -2.934 -18.886  1.00 79.18           C  
ATOM   3293  HE1 MET A 208      -4.433  -3.448 -19.334  1.00 79.18           H  
ATOM   3294  HE2 MET A 208      -2.669  -3.479 -19.123  1.00 79.18           H  
ATOM   3295  HE3 MET A 208      -3.706  -2.893 -17.804  1.00 79.18           H  
ATOM   3296  N   ILE A 209      -6.519   2.970 -17.393  1.00 79.38           N  
ATOM   3297  H   ILE A 209      -6.213   3.604 -18.117  1.00 79.38           H  
ATOM   3298  CA  ILE A 209      -6.609   3.497 -16.015  1.00 79.38           C  
ATOM   3299  HA  ILE A 209      -6.111   2.782 -15.360  1.00 79.38           H  
ATOM   3300  C   ILE A 209      -8.078   3.582 -15.539  1.00 79.38           C  
ATOM   3301  CB  ILE A 209      -5.849   4.848 -15.893  1.00 79.38           C  
ATOM   3302  HB  ILE A 209      -6.410   5.609 -16.435  1.00 79.38           H  
ATOM   3303  O   ILE A 209      -8.349   3.597 -14.338  1.00 79.38           O  
ATOM   3304  CG1 ILE A 209      -4.428   4.759 -16.511  1.00 79.38           C  
ATOM   3305 HG12 ILE A 209      -3.853   3.993 -15.990  1.00 79.38           H  
ATOM   3306 HG13 ILE A 209      -4.502   4.466 -17.558  1.00 79.38           H  
ATOM   3307  CG2 ILE A 209      -5.749   5.292 -14.418  1.00 79.38           C  
ATOM   3308 HG21 ILE A 209      -5.213   4.541 -13.837  1.00 79.38           H  
ATOM   3309 HG22 ILE A 209      -5.226   6.245 -14.338  1.00 79.38           H  
ATOM   3310 HG23 ILE A 209      -6.740   5.441 -13.991  1.00 79.38           H  
ATOM   3311  CD1 ILE A 209      -3.634   6.071 -16.491  1.00 79.38           C  
ATOM   3312 HD11 ILE A 209      -3.310   6.311 -15.478  1.00 79.38           H  
ATOM   3313 HD12 ILE A 209      -4.249   6.880 -16.885  1.00 79.38           H  
ATOM   3314 HD13 ILE A 209      -2.746   5.962 -17.115  1.00 79.38           H  
ATOM   3315  N   ARG A 210      -9.052   3.525 -16.463  1.00 76.25           N  
ATOM   3316  H   ARG A 210      -8.762   3.491 -17.430  1.00 76.25           H  
ATOM   3317  CA  ARG A 210     -10.494   3.383 -16.171  1.00 76.25           C  
ATOM   3318  HA  ARG A 210     -10.815   4.237 -15.575  1.00 76.25           H  
ATOM   3319  C   ARG A 210     -10.824   2.117 -15.366  1.00 76.25           C  
ATOM   3320  CB  ARG A 210     -11.265   3.359 -17.511  1.00 76.25           C  
ATOM   3321  HB2 ARG A 210     -11.133   2.377 -17.964  1.00 76.25           H  
ATOM   3322  HB3 ARG A 210     -10.835   4.105 -18.178  1.00 76.25           H  
ATOM   3323  O   ARG A 210     -11.893   2.066 -14.765  1.00 76.25           O  
ATOM   3324  CG  ARG A 210     -12.774   3.647 -17.415  1.00 76.25           C  
ATOM   3325  HG2 ARG A 210     -12.908   4.691 -17.132  1.00 76.25           H  
ATOM   3326  HG3 ARG A 210     -13.240   3.018 -16.656  1.00 76.25           H  
ATOM   3327  CD  ARG A 210     -13.477   3.373 -18.758  1.00 76.25           C  
ATOM   3328  HD2 ARG A 210     -12.880   3.781 -19.574  1.00 76.25           H  
ATOM   3329  HD3 ARG A 210     -13.546   2.296 -18.912  1.00 76.25           H  
ATOM   3330  NE  ARG A 210     -14.831   3.963 -18.792  1.00 76.25           N  
ATOM   3331  HE  ARG A 210     -15.624   3.392 -18.539  1.00 76.25           H  
ATOM   3332  NH1 ARG A 210     -14.218   6.098 -19.393  1.00 76.25           N  
ATOM   3333 HH11 ARG A 210     -14.508   7.065 -19.396  1.00 76.25           H  
ATOM   3334 HH12 ARG A 210     -13.281   5.813 -19.637  1.00 76.25           H  
ATOM   3335  NH2 ARG A 210     -16.319   5.669 -18.863  1.00 76.25           N  
ATOM   3336 HH21 ARG A 210     -17.035   5.019 -18.572  1.00 76.25           H  
ATOM   3337 HH22 ARG A 210     -16.474   6.666 -18.915  1.00 76.25           H  
ATOM   3338  CZ  ARG A 210     -15.115   5.229 -19.029  1.00 76.25           C  
ATOM   3339  N   MET A 211      -9.966   1.090 -15.387  1.00 73.62           N  
ATOM   3340  H   MET A 211      -9.100   1.203 -15.894  1.00 73.62           H  
ATOM   3341  CA  MET A 211     -10.340  -0.263 -14.959  1.00 73.62           C  
ATOM   3342  HA  MET A 211     -11.348  -0.437 -15.336  1.00 73.62           H  
ATOM   3343  C   MET A 211     -10.427  -0.440 -13.434  1.00 73.62           C  
ATOM   3344  CB  MET A 211      -9.408  -1.284 -15.633  1.00 73.62           C  
ATOM   3345  HB2 MET A 211      -8.470  -1.347 -15.080  1.00 73.62           H  
ATOM   3346  HB3 MET A 211      -9.173  -0.949 -16.644  1.00 73.62           H  
ATOM   3347  O   MET A 211     -11.436  -0.949 -12.946  1.00 73.62           O  
ATOM   3348  CG  MET A 211     -10.037  -2.679 -15.738  1.00 73.62           C  
ATOM   3349  HG2 MET A 211     -10.169  -3.076 -14.731  1.00 73.62           H  
ATOM   3350  HG3 MET A 211      -9.331  -3.328 -16.256  1.00 73.62           H  
ATOM   3351  SD  MET A 211     -11.639  -2.785 -16.600  1.00 73.62           S  
ATOM   3352  CE  MET A 211     -11.285  -1.930 -18.162  1.00 73.62           C  
ATOM   3353  HE1 MET A 211     -10.393  -2.351 -18.626  1.00 73.62           H  
ATOM   3354  HE2 MET A 211     -11.130  -0.867 -17.980  1.00 73.62           H  
ATOM   3355  HE3 MET A 211     -12.131  -2.056 -18.838  1.00 73.62           H  
ATOM   3356  N   ASP A 212      -9.458   0.056 -12.650  1.00 77.05           N  
ATOM   3357  H   ASP A 212      -8.670   0.516 -13.083  1.00 77.05           H  
ATOM   3358  CA  ASP A 212      -9.587   0.105 -11.179  1.00 77.05           C  
ATOM   3359  HA  ASP A 212     -10.147  -0.779 -10.875  1.00 77.05           H  
ATOM   3360  C   ASP A 212     -10.429   1.315 -10.735  1.00 77.05           C  
ATOM   3361  CB  ASP A 212      -8.240   0.001 -10.441  1.00 77.05           C  
ATOM   3362  HB2 ASP A 212      -7.630   0.874 -10.674  1.00 77.05           H  
ATOM   3363  HB3 ASP A 212      -7.714  -0.890 -10.785  1.00 77.05           H  
ATOM   3364  O   ASP A 212      -9.988   2.218 -10.026  1.00 77.05           O  
ATOM   3365  CG  ASP A 212      -8.441  -0.099  -8.916  1.00 77.05           C  
ATOM   3366  OD1 ASP A 212      -9.588  -0.341  -8.457  1.00 77.05           O  
ATOM   3367  OD2 ASP A 212      -7.460   0.107  -8.164  1.00 77.05           O  
ATOM   3368  N   ARG A 213     -11.693   1.336 -11.161  1.00 72.86           N  
ATOM   3369  H   ARG A 213     -11.954   0.590 -11.791  1.00 72.86           H  
ATOM   3370  CA  ARG A 213     -12.641   2.439 -10.935  1.00 72.86           C  
ATOM   3371  HA  ARG A 213     -12.135   3.362 -11.219  1.00 72.86           H  
ATOM   3372  C   ARG A 213     -13.070   2.610  -9.468  1.00 72.86           C  
ATOM   3373  CB  ARG A 213     -13.812   2.197 -11.889  1.00 72.86           C  
ATOM   3374  HB2 ARG A 213     -13.399   1.927 -12.860  1.00 72.86           H  
ATOM   3375  HB3 ARG A 213     -14.397   1.348 -11.532  1.00 72.86           H  
ATOM   3376  O   ARG A 213     -13.619   3.648  -9.092  1.00 72.86           O  
ATOM   3377  CG  ARG A 213     -14.733   3.409 -12.084  1.00 72.86           C  
ATOM   3378  HG2 ARG A 213     -14.147   4.327 -12.036  1.00 72.86           H  
ATOM   3379  HG3 ARG A 213     -15.464   3.432 -11.276  1.00 72.86           H  
ATOM   3380  CD  ARG A 213     -15.459   3.382 -13.441  1.00 72.86           C  
ATOM   3381  HD2 ARG A 213     -14.783   3.787 -14.195  1.00 72.86           H  
ATOM   3382  HD3 ARG A 213     -16.329   4.036 -13.384  1.00 72.86           H  
ATOM   3383  NE  ARG A 213     -15.873   2.036 -13.880  1.00 72.86           N  
ATOM   3384  HE  ARG A 213     -15.447   1.691 -14.728  1.00 72.86           H  
ATOM   3385  NH1 ARG A 213     -17.352   1.482 -12.184  1.00 72.86           N  
ATOM   3386 HH11 ARG A 213     -17.313   2.365 -11.697  1.00 72.86           H  
ATOM   3387 HH12 ARG A 213     -17.981   0.775 -11.832  1.00 72.86           H  
ATOM   3388  NH2 ARG A 213     -16.856  -0.005 -13.707  1.00 72.86           N  
ATOM   3389 HH21 ARG A 213     -17.488  -0.620 -13.214  1.00 72.86           H  
ATOM   3390 HH22 ARG A 213     -16.421  -0.338 -14.556  1.00 72.86           H  
ATOM   3391  CZ  ARG A 213     -16.689   1.203 -13.266  1.00 72.86           C  
ATOM   3392  N   ARG A 214     -12.790   1.604  -8.628  1.00 72.77           N  
ATOM   3393  H   ARG A 214     -12.302   0.821  -9.041  1.00 72.77           H  
ATOM   3394  CA  ARG A 214     -12.884   1.648  -7.155  1.00 72.77           C  
ATOM   3395  HA  ARG A 214     -13.710   2.292  -6.853  1.00 72.77           H  
ATOM   3396  C   ARG A 214     -11.616   2.219  -6.505  1.00 72.77           C  
ATOM   3397  CB  ARG A 214     -13.122   0.220  -6.626  1.00 72.77           C  
ATOM   3398  HB2 ARG A 214     -12.863   0.175  -5.568  1.00 72.77           H  
ATOM   3399  HB3 ARG A 214     -12.431  -0.448  -7.140  1.00 72.77           H  
ATOM   3400  O   ARG A 214     -11.671   2.589  -5.329  1.00 72.77           O  
ATOM   3401  CG  ARG A 214     -14.550  -0.332  -6.798  1.00 72.77           C  
ATOM   3402  HG2 ARG A 214     -14.993   0.032  -7.725  1.00 72.77           H  
ATOM   3403  HG3 ARG A 214     -14.456  -1.415  -6.882  1.00 72.77           H  
ATOM   3404  CD  ARG A 214     -15.481  -0.026  -5.608  1.00 72.77           C  
ATOM   3405  HD2 ARG A 214     -15.911   0.969  -5.720  1.00 72.77           H  
ATOM   3406  HD3 ARG A 214     -14.895  -0.049  -4.690  1.00 72.77           H  
ATOM   3407  NE  ARG A 214     -16.557  -1.033  -5.522  1.00 72.77           N  
ATOM   3408  HE  ARG A 214     -16.994  -1.294  -6.394  1.00 72.77           H  
ATOM   3409  NH1 ARG A 214     -16.844  -1.207  -3.235  1.00 72.77           N  
ATOM   3410 HH11 ARG A 214     -16.529  -0.253  -3.133  1.00 72.77           H  
ATOM   3411 HH12 ARG A 214     -17.249  -1.702  -2.453  1.00 72.77           H  
ATOM   3412  NH2 ARG A 214     -17.512  -2.841  -4.560  1.00 72.77           N  
ATOM   3413 HH21 ARG A 214     -17.735  -3.347  -3.715  1.00 72.77           H  
ATOM   3414 HH22 ARG A 214     -17.524  -3.294  -5.463  1.00 72.77           H  
ATOM   3415  CZ  ARG A 214     -16.966  -1.671  -4.439  1.00 72.77           C  
ATOM   3416  N   GLY A 215     -10.490   2.253  -7.217  1.00 80.67           N  
ATOM   3417  H   GLY A 215     -10.511   1.940  -8.177  1.00 80.67           H  
ATOM   3418  CA  GLY A 215      -9.160   2.515  -6.673  1.00 80.67           C  
ATOM   3419  HA2 GLY A 215      -9.143   3.491  -6.189  1.00 80.67           H  
ATOM   3420  HA3 GLY A 215      -8.449   2.518  -7.499  1.00 80.67           H  
ATOM   3421  C   GLY A 215      -8.698   1.461  -5.665  1.00 80.67           C  
ATOM   3422  O   GLY A 215      -7.992   1.816  -4.730  1.00 80.67           O  
ATOM   3423  N   GLY A 216      -9.158   0.211  -5.763  1.00 83.09           N  
ATOM   3424  H   GLY A 216      -9.536  -0.048  -6.663  1.00 83.09           H  
ATOM   3425  CA  GLY A 216      -8.874  -0.863  -4.808  1.00 83.09           C  
ATOM   3426  HA2 GLY A 216      -9.242  -0.584  -3.820  1.00 83.09           H  
ATOM   3427  HA3 GLY A 216      -9.394  -1.763  -5.135  1.00 83.09           H  
ATOM   3428  C   GLY A 216      -7.386  -1.202  -4.693  1.00 83.09           C  
ATOM   3429  O   GLY A 216      -6.859  -1.251  -3.581  1.00 83.09           O  
ATOM   3430  N   THR A 217      -6.694  -1.358  -5.821  1.00 85.34           N  
ATOM   3431  H   THR A 217      -7.156  -1.201  -6.706  1.00 85.34           H  
ATOM   3432  CA  THR A 217      -5.251  -1.647  -5.854  1.00 85.34           C  
ATOM   3433  HA  THR A 217      -5.038  -2.476  -5.180  1.00 85.34           H  
ATOM   3434  C   THR A 217      -4.460  -0.433  -5.377  1.00 85.34           C  
ATOM   3435  CB  THR A 217      -4.814  -2.059  -7.269  1.00 85.34           C  
ATOM   3436  HB  THR A 217      -4.985  -1.236  -7.962  1.00 85.34           H  
ATOM   3437  O   THR A 217      -3.583  -0.557  -4.523  1.00 85.34           O  
ATOM   3438  CG2 THR A 217      -3.347  -2.483  -7.338  1.00 85.34           C  
ATOM   3439 HG21 THR A 217      -3.159  -3.296  -6.637  1.00 85.34           H  
ATOM   3440 HG22 THR A 217      -3.107  -2.817  -8.347  1.00 85.34           H  
ATOM   3441 HG23 THR A 217      -2.699  -1.641  -7.095  1.00 85.34           H  
ATOM   3442  OG1 THR A 217      -5.574  -3.172  -7.675  1.00 85.34           O  
ATOM   3443  HG1 THR A 217      -5.280  -3.419  -8.555  1.00 85.34           H  
ATOM   3444  N   TRP A 218      -4.837   0.763  -5.841  1.00 88.33           N  
ATOM   3445  H   TRP A 218      -5.552   0.785  -6.554  1.00 88.33           H  
ATOM   3446  CA  TRP A 218      -4.204   2.025  -5.445  1.00 88.33           C  
ATOM   3447  HA  TRP A 218      -3.133   1.945  -5.630  1.00 88.33           H  
ATOM   3448  C   TRP A 218      -4.376   2.335  -3.949  1.00 88.33           C  
ATOM   3449  CB  TRP A 218      -4.753   3.148  -6.334  1.00 88.33           C  
ATOM   3450  HB2 TRP A 218      -4.304   4.090  -6.020  1.00 88.33           H  
ATOM   3451  HB3 TRP A 218      -5.830   3.227  -6.192  1.00 88.33           H  
ATOM   3452  O   TRP A 218      -3.419   2.750  -3.296  1.00 88.33           O  
ATOM   3453  CG  TRP A 218      -4.462   2.962  -7.794  1.00 88.33           C  
ATOM   3454  CD1 TRP A 218      -5.335   2.526  -8.731  1.00 88.33           C  
ATOM   3455  HD1 TRP A 218      -6.366   2.259  -8.550  1.00 88.33           H  
ATOM   3456  CD2 TRP A 218      -3.187   3.133  -8.491  1.00 88.33           C  
ATOM   3457  CE2 TRP A 218      -3.370   2.779  -9.862  1.00 88.33           C  
ATOM   3458  CE3 TRP A 218      -1.889   3.529  -8.099  1.00 88.33           C  
ATOM   3459  HE3 TRP A 218      -1.704   3.801  -7.070  1.00 88.33           H  
ATOM   3460  NE1 TRP A 218      -4.698   2.426  -9.951  1.00 88.33           N  
ATOM   3461  HE1 TRP A 218      -5.148   2.080 -10.787  1.00 88.33           H  
ATOM   3462  CH2 TRP A 218      -1.046   3.215 -10.373  1.00 88.33           C  
ATOM   3463  HH2 TRP A 218      -0.226   3.245 -11.075  1.00 88.33           H  
ATOM   3464  CZ2 TRP A 218      -2.325   2.816 -10.796  1.00 88.33           C  
ATOM   3465  HZ2 TRP A 218      -2.495   2.535 -11.825  1.00 88.33           H  
ATOM   3466  CZ3 TRP A 218      -0.831   3.570  -9.029  1.00 88.33           C  
ATOM   3467  HZ3 TRP A 218       0.156   3.871  -8.712  1.00 88.33           H  
ATOM   3468  N   LYS A 219      -5.558   2.062  -3.372  1.00 87.53           N  
ATOM   3469  H   LYS A 219      -6.305   1.750  -3.976  1.00 87.53           H  
ATOM   3470  CA  LYS A 219      -5.811   2.102  -1.920  1.00 87.53           C  
ATOM   3471  HA  LYS A 219      -5.596   3.099  -1.536  1.00 87.53           H  
ATOM   3472  C   LYS A 219      -4.888   1.136  -1.181  1.00 87.53           C  
ATOM   3473  CB  LYS A 219      -7.272   1.721  -1.607  1.00 87.53           C  
ATOM   3474  HB2 LYS A 219      -7.337   1.414  -0.563  1.00 87.53           H  
ATOM   3475  HB3 LYS A 219      -7.534   0.852  -2.211  1.00 87.53           H  
ATOM   3476  O   LYS A 219      -4.265   1.538  -0.202  1.00 87.53           O  
ATOM   3477  CG  LYS A 219      -8.317   2.830  -1.818  1.00 87.53           C  
ATOM   3478  HG2 LYS A 219      -8.291   3.517  -0.972  1.00 87.53           H  
ATOM   3479  HG3 LYS A 219      -8.101   3.389  -2.729  1.00 87.53           H  
ATOM   3480  CD  LYS A 219      -9.707   2.180  -1.929  1.00 87.53           C  
ATOM   3481  HD2 LYS A 219      -9.883   1.554  -1.055  1.00 87.53           H  
ATOM   3482  HD3 LYS A 219      -9.714   1.542  -2.813  1.00 87.53           H  
ATOM   3483  CE  LYS A 219     -10.849   3.195  -2.045  1.00 87.53           C  
ATOM   3484  HE2 LYS A 219     -11.038   3.625  -1.062  1.00 87.53           H  
ATOM   3485  HE3 LYS A 219     -10.552   3.994  -2.725  1.00 87.53           H  
ATOM   3486  NZ  LYS A 219     -12.073   2.536  -2.562  1.00 87.53           N  
ATOM   3487  HZ1 LYS A 219     -12.238   1.642  -2.121  1.00 87.53           H  
ATOM   3488  HZ2 LYS A 219     -12.923   3.048  -2.374  1.00 87.53           H  
ATOM   3489  HZ3 LYS A 219     -12.018   2.412  -3.563  1.00 87.53           H  
ATOM   3490  N   LEU A 220      -4.808  -0.122  -1.625  1.00 87.60           N  
ATOM   3491  H   LEU A 220      -5.345  -0.382  -2.440  1.00 87.60           H  
ATOM   3492  CA  LEU A 220      -4.040  -1.163  -0.939  1.00 87.60           C  
ATOM   3493  HA  LEU A 220      -4.382  -1.189   0.096  1.00 87.60           H  
ATOM   3494  C   LEU A 220      -2.541  -0.830  -0.917  1.00 87.60           C  
ATOM   3495  CB  LEU A 220      -4.333  -2.530  -1.588  1.00 87.60           C  
ATOM   3496  HB2 LEU A 220      -3.960  -2.517  -2.612  1.00 87.60           H  
ATOM   3497  HB3 LEU A 220      -5.412  -2.683  -1.633  1.00 87.60           H  
ATOM   3498  O   LEU A 220      -1.968  -0.771   0.175  1.00 87.60           O  
ATOM   3499  CG  LEU A 220      -3.698  -3.721  -0.843  1.00 87.60           C  
ATOM   3500  HG  LEU A 220      -2.638  -3.526  -0.682  1.00 87.60           H  
ATOM   3501  CD1 LEU A 220      -4.351  -3.970   0.520  1.00 87.60           C  
ATOM   3502 HD11 LEU A 220      -3.877  -4.828   0.997  1.00 87.60           H  
ATOM   3503 HD12 LEU A 220      -5.412  -4.181   0.391  1.00 87.60           H  
ATOM   3504 HD13 LEU A 220      -4.227  -3.100   1.165  1.00 87.60           H  
ATOM   3505  CD2 LEU A 220      -3.835  -4.993  -1.676  1.00 87.60           C  
ATOM   3506 HD21 LEU A 220      -3.355  -5.827  -1.163  1.00 87.60           H  
ATOM   3507 HD22 LEU A 220      -3.346  -4.859  -2.641  1.00 87.60           H  
ATOM   3508 HD23 LEU A 220      -4.886  -5.229  -1.839  1.00 87.60           H  
ATOM   3509  N   LEU A 221      -1.962  -0.555  -2.094  1.00 91.06           N  
ATOM   3510  H   LEU A 221      -2.545  -0.613  -2.917  1.00 91.06           H  
ATOM   3511  CA  LEU A 221      -0.553  -0.207  -2.316  1.00 91.06           C  
ATOM   3512  HA  LEU A 221       0.074  -0.993  -1.896  1.00 91.06           H  
ATOM   3513  C   LEU A 221      -0.167   1.105  -1.627  1.00 91.06           C  
ATOM   3514  CB  LEU A 221      -0.303  -0.133  -3.839  1.00 91.06           C  
ATOM   3515  HB2 LEU A 221      -0.424  -1.130  -4.263  1.00 91.06           H  
ATOM   3516  HB3 LEU A 221      -1.067   0.507  -4.280  1.00 91.06           H  
ATOM   3517  O   LEU A 221       0.785   1.126  -0.850  1.00 91.06           O  
ATOM   3518  CG  LEU A 221       1.072   0.429  -4.265  1.00 91.06           C  
ATOM   3519  HG  LEU A 221       1.183   1.441  -3.876  1.00 91.06           H  
ATOM   3520  CD1 LEU A 221       2.250  -0.412  -3.773  1.00 91.06           C  
ATOM   3521 HD11 LEU A 221       3.184   0.075  -4.055  1.00 91.06           H  
ATOM   3522 HD12 LEU A 221       2.227  -1.400  -4.232  1.00 91.06           H  
ATOM   3523 HD13 LEU A 221       2.233  -0.508  -2.688  1.00 91.06           H  
ATOM   3524  CD2 LEU A 221       1.140   0.509  -5.789  1.00 91.06           C  
ATOM   3525 HD21 LEU A 221       2.096   0.933  -6.093  1.00 91.06           H  
ATOM   3526 HD22 LEU A 221       0.342   1.147  -6.168  1.00 91.06           H  
ATOM   3527 HD23 LEU A 221       1.043  -0.486  -6.225  1.00 91.06           H  
ATOM   3528  N   GLY A 222      -0.927   2.186  -1.837  1.00 92.54           N  
ATOM   3529  H   GLY A 222      -1.707   2.126  -2.476  1.00 92.54           H  
ATOM   3530  CA  GLY A 222      -0.655   3.476  -1.194  1.00 92.54           C  
ATOM   3531  HA2 GLY A 222       0.329   3.834  -1.497  1.00 92.54           H  
ATOM   3532  HA3 GLY A 222      -1.407   4.197  -1.515  1.00 92.54           H  
ATOM   3533  C   GLY A 222      -0.693   3.383   0.334  1.00 92.54           C  
ATOM   3534  O   GLY A 222       0.089   4.030   1.021  1.00 92.54           O  
ATOM   3535  N   SER A 223      -1.532   2.498   0.877  1.00 90.15           N  
ATOM   3536  H   SER A 223      -2.159   2.008   0.254  1.00 90.15           H  
ATOM   3537  CA  SER A 223      -1.601   2.185   2.307  1.00 90.15           C  
ATOM   3538  HA  SER A 223      -1.413   3.104   2.862  1.00 90.15           H  
ATOM   3539  C   SER A 223      -0.535   1.170   2.783  1.00 90.15           C  
ATOM   3540  CB  SER A 223      -3.048   1.761   2.608  1.00 90.15           C  
ATOM   3541  HB2 SER A 223      -3.710   2.607   2.423  1.00 90.15           H  
ATOM   3542  HB3 SER A 223      -3.324   0.956   1.927  1.00 90.15           H  
ATOM   3543  O   SER A 223      -0.489   0.876   3.973  1.00 90.15           O  
ATOM   3544  OG  SER A 223      -3.261   1.284   3.923  1.00 90.15           O  
ATOM   3545  HG  SER A 223      -2.836   1.881   4.543  1.00 90.15           H  
ATOM   3546  N   VAL A 224       0.297   0.589   1.908  1.00 93.26           N  
ATOM   3547  H   VAL A 224       0.190   0.809   0.928  1.00 93.26           H  
ATOM   3548  CA  VAL A 224       1.555  -0.092   2.299  1.00 93.26           C  
ATOM   3549  HA  VAL A 224       1.476  -0.461   3.321  1.00 93.26           H  
ATOM   3550  C   VAL A 224       2.697   0.927   2.292  1.00 93.26           C  
ATOM   3551  CB  VAL A 224       1.887  -1.309   1.400  1.00 93.26           C  
ATOM   3552  HB  VAL A 224       1.935  -0.990   0.359  1.00 93.26           H  
ATOM   3553  O   VAL A 224       3.366   1.092   3.307  1.00 93.26           O  
ATOM   3554  CG1 VAL A 224       3.222  -1.961   1.778  1.00 93.26           C  
ATOM   3555 HG11 VAL A 224       4.044  -1.254   1.670  1.00 93.26           H  
ATOM   3556 HG12 VAL A 224       3.423  -2.809   1.123  1.00 93.26           H  
ATOM   3557 HG13 VAL A 224       3.188  -2.312   2.809  1.00 93.26           H  
ATOM   3558  CG2 VAL A 224       0.833  -2.413   1.534  1.00 93.26           C  
ATOM   3559 HG21 VAL A 224       1.101  -3.244   0.883  1.00 93.26           H  
ATOM   3560 HG22 VAL A 224      -0.147  -2.044   1.230  1.00 93.26           H  
ATOM   3561 HG23 VAL A 224       0.804  -2.775   2.562  1.00 93.26           H  
ATOM   3562  N   VAL A 225       2.842   1.690   1.202  1.00 94.89           N  
ATOM   3563  H   VAL A 225       2.252   1.494   0.406  1.00 94.89           H  
ATOM   3564  CA  VAL A 225       3.859   2.751   1.052  1.00 94.89           C  
ATOM   3565  HA  VAL A 225       4.849   2.303   1.131  1.00 94.89           H  
ATOM   3566  C   VAL A 225       3.752   3.804   2.164  1.00 94.89           C  
ATOM   3567  CB  VAL A 225       3.737   3.414  -0.339  1.00 94.89           C  
ATOM   3568  HB  VAL A 225       2.728   3.811  -0.448  1.00 94.89           H  
ATOM   3569  O   VAL A 225       4.764   4.229   2.707  1.00 94.89           O  
ATOM   3570  CG1 VAL A 225       4.731   4.566  -0.535  1.00 94.89           C  
ATOM   3571 HG11 VAL A 225       4.513   5.383   0.152  1.00 94.89           H  
ATOM   3572 HG12 VAL A 225       4.665   4.951  -1.552  1.00 94.89           H  
ATOM   3573 HG13 VAL A 225       5.748   4.216  -0.356  1.00 94.89           H  
ATOM   3574  CG2 VAL A 225       3.982   2.412  -1.477  1.00 94.89           C  
ATOM   3575 HG21 VAL A 225       5.019   2.076  -1.459  1.00 94.89           H  
ATOM   3576 HG22 VAL A 225       3.327   1.545  -1.389  1.00 94.89           H  
ATOM   3577 HG23 VAL A 225       3.791   2.891  -2.437  1.00 94.89           H  
ATOM   3578  N   TYR A 226       2.535   4.193   2.560  1.00 94.73           N  
ATOM   3579  H   TYR A 226       1.734   3.887   2.026  1.00 94.73           H  
ATOM   3580  CA  TYR A 226       2.318   5.128   3.671  1.00 94.73           C  
ATOM   3581  HA  TYR A 226       2.983   5.980   3.534  1.00 94.73           H  
ATOM   3582  C   TYR A 226       2.638   4.529   5.053  1.00 94.73           C  
ATOM   3583  CB  TYR A 226       0.873   5.646   3.621  1.00 94.73           C  
ATOM   3584  HB2 TYR A 226       0.711   6.143   2.665  1.00 94.73           H  
ATOM   3585  HB3 TYR A 226       0.192   4.797   3.674  1.00 94.73           H  
ATOM   3586  O   TYR A 226       3.022   5.270   5.956  1.00 94.73           O  
ATOM   3587  CG  TYR A 226       0.533   6.623   4.732  1.00 94.73           C  
ATOM   3588  CD1 TYR A 226      -0.323   6.233   5.782  1.00 94.73           C  
ATOM   3589  HD1 TYR A 226      -0.757   5.244   5.788  1.00 94.73           H  
ATOM   3590  CD2 TYR A 226       1.135   7.897   4.750  1.00 94.73           C  
ATOM   3591  HD2 TYR A 226       1.815   8.181   3.960  1.00 94.73           H  
ATOM   3592  CE1 TYR A 226      -0.573   7.115   6.849  1.00 94.73           C  
ATOM   3593  HE1 TYR A 226      -1.201   6.813   7.675  1.00 94.73           H  
ATOM   3594  CE2 TYR A 226       0.893   8.779   5.820  1.00 94.73           C  
ATOM   3595  HE2 TYR A 226       1.382   9.742   5.844  1.00 94.73           H  
ATOM   3596  OH  TYR A 226      -0.198   9.228   7.912  1.00 94.73           O  
ATOM   3597  HH  TYR A 226       0.390   9.986   7.886  1.00 94.73           H  
ATOM   3598  CZ  TYR A 226       0.039   8.385   6.873  1.00 94.73           C  
ATOM   3599  N   ALA A 227       2.505   3.210   5.235  1.00 91.57           N  
ATOM   3600  H   ALA A 227       2.326   2.622   4.434  1.00 91.57           H  
ATOM   3601  CA  ALA A 227       2.850   2.553   6.497  1.00 91.57           C  
ATOM   3602  HA  ALA A 227       2.466   3.150   7.324  1.00 91.57           H  
ATOM   3603  C   ALA A 227       4.375   2.476   6.669  1.00 91.57           C  
ATOM   3604  CB  ALA A 227       2.176   1.176   6.553  1.00 91.57           C  
ATOM   3605  HB1 ALA A 227       2.399   0.703   7.510  1.00 91.57           H  
ATOM   3606  HB2 ALA A 227       1.096   1.284   6.451  1.00 91.57           H  
ATOM   3607  HB3 ALA A 227       2.551   0.533   5.757  1.00 91.57           H  
ATOM   3608  O   ALA A 227       4.907   2.987   7.652  1.00 91.57           O  
ATOM   3609  N   HIS A 228       5.070   1.949   5.658  1.00 94.47           N  
ATOM   3610  H   HIS A 228       4.560   1.582   4.868  1.00 94.47           H  
ATOM   3611  CA  HIS A 228       6.531   1.809   5.631  1.00 94.47           C  
ATOM   3612  HA  HIS A 228       6.863   1.695   6.663  1.00 94.47           H  
ATOM   3613  C   HIS A 228       7.249   3.064   5.107  1.00 94.47           C  
ATOM   3614  CB  HIS A 228       6.898   0.521   4.889  1.00 94.47           C  
ATOM   3615  HB2 HIS A 228       7.983   0.411   4.907  1.00 94.47           H  
ATOM   3616  HB3 HIS A 228       6.567   0.580   3.852  1.00 94.47           H  
ATOM   3617  O   HIS A 228       8.282   3.001   4.437  1.00 94.47           O  
ATOM   3618  CG  HIS A 228       6.293  -0.684   5.555  1.00 94.47           C  
ATOM   3619  CD2 HIS A 228       5.217  -1.412   5.130  1.00 94.47           C  
ATOM   3620  HD2 HIS A 228       4.679  -1.251   4.207  1.00 94.47           H  
ATOM   3621  ND1 HIS A 228       6.637  -1.155   6.796  1.00 94.47           N  
ATOM   3622  HD1 HIS A 228       7.340  -0.741   7.391  1.00 94.47           H  
ATOM   3623  CE1 HIS A 228       5.802  -2.159   7.106  1.00 94.47           C  
ATOM   3624  HE1 HIS A 228       5.830  -2.717   8.030  1.00 94.47           H  
ATOM   3625  NE2 HIS A 228       4.895  -2.340   6.126  1.00 94.47           N  
ATOM   3626  N   SER A 229       6.663   4.229   5.392  1.00 95.11           N  
ATOM   3627  H   SER A 229       5.870   4.207   6.017  1.00 95.11           H  
ATOM   3628  CA  SER A 229       7.030   5.523   4.810  1.00 95.11           C  
ATOM   3629  HA  SER A 229       7.195   5.378   3.742  1.00 95.11           H  
ATOM   3630  C   SER A 229       8.318   6.127   5.366  1.00 95.11           C  
ATOM   3631  CB  SER A 229       5.877   6.519   4.964  1.00 95.11           C  
ATOM   3632  HB2 SER A 229       5.066   6.228   4.297  1.00 95.11           H  
ATOM   3633  HB3 SER A 229       6.214   7.514   4.674  1.00 95.11           H  
ATOM   3634  O   SER A 229       8.821   7.083   4.783  1.00 95.11           O  
ATOM   3635  OG  SER A 229       5.391   6.556   6.295  1.00 95.11           O  
ATOM   3636  HG  SER A 229       4.540   6.112   6.308  1.00 95.11           H  
ATOM   3637  N   LYS A 230       8.880   5.576   6.451  1.00 95.02           N  
ATOM   3638  H   LYS A 230       8.436   4.755   6.837  1.00 95.02           H  
ATOM   3639  CA  LYS A 230      10.250   5.902   6.880  1.00 95.02           C  
ATOM   3640  HA  LYS A 230      10.531   6.889   6.511  1.00 95.02           H  
ATOM   3641  C   LYS A 230      11.226   4.928   6.246  1.00 95.02           C  
ATOM   3642  CB  LYS A 230      10.389   5.907   8.406  1.00 95.02           C  
ATOM   3643  HB2 LYS A 230      10.112   4.926   8.791  1.00 95.02           H  
ATOM   3644  HB3 LYS A 230      11.437   6.072   8.657  1.00 95.02           H  
ATOM   3645  O   LYS A 230      12.144   5.351   5.565  1.00 95.02           O  
ATOM   3646  CG  LYS A 230       9.556   7.015   9.068  1.00 95.02           C  
ATOM   3647  HG2 LYS A 230      10.003   7.974   8.805  1.00 95.02           H  
ATOM   3648  HG3 LYS A 230       8.533   7.007   8.691  1.00 95.02           H  
ATOM   3649  CD  LYS A 230       9.531   6.886  10.599  1.00 95.02           C  
ATOM   3650  HD2 LYS A 230       9.427   7.887  11.018  1.00 95.02           H  
ATOM   3651  HD3 LYS A 230      10.473   6.475  10.962  1.00 95.02           H  
ATOM   3652  CE  LYS A 230       8.343   6.047  11.104  1.00 95.02           C  
ATOM   3653  HE2 LYS A 230       7.424   6.512  10.746  1.00 95.02           H  
ATOM   3654  HE3 LYS A 230       8.336   6.089  12.193  1.00 95.02           H  
ATOM   3655  NZ  LYS A 230       8.388   4.622  10.661  1.00 95.02           N  
ATOM   3656  HZ1 LYS A 230       8.434   4.519   9.657  1.00 95.02           H  
ATOM   3657  HZ2 LYS A 230       7.578   4.097  10.959  1.00 95.02           H  
ATOM   3658  HZ3 LYS A 230       9.209   4.149  11.009  1.00 95.02           H  
ATOM   3659  N   GLU A 231      10.972   3.634   6.406  1.00 95.08           N  
ATOM   3660  H   GLU A 231      10.178   3.389   6.980  1.00 95.08           H  
ATOM   3661  CA  GLU A 231      11.846   2.544   5.969  1.00 95.08           C  
ATOM   3662  HA  GLU A 231      12.784   2.602   6.521  1.00 95.08           H  
ATOM   3663  C   GLU A 231      12.201   2.642   4.475  1.00 95.08           C  
ATOM   3664  CB  GLU A 231      11.173   1.196   6.296  1.00 95.08           C  
ATOM   3665  HB2 GLU A 231      10.305   1.049   5.654  1.00 95.08           H  
ATOM   3666  HB3 GLU A 231      11.891   0.407   6.068  1.00 95.08           H  
ATOM   3667  O   GLU A 231      13.375   2.591   4.113  1.00 95.08           O  
ATOM   3668  CG  GLU A 231      10.744   1.042   7.771  1.00 95.08           C  
ATOM   3669  HG2 GLU A 231      11.432   1.594   8.412  1.00 95.08           H  
ATOM   3670  HG3 GLU A 231      10.837  -0.011   8.037  1.00 95.08           H  
ATOM   3671  CD  GLU A 231       9.293   1.488   8.046  1.00 95.08           C  
ATOM   3672  OE1 GLU A 231       9.048   2.714   8.234  1.00 95.08           O  
ATOM   3673  OE2 GLU A 231       8.412   0.601   8.083  1.00 95.08           O  
ATOM   3674  N   LEU A 232      11.204   2.875   3.612  1.00 94.65           N  
ATOM   3675  H   LEU A 232      10.260   2.914   3.969  1.00 94.65           H  
ATOM   3676  CA  LEU A 232      11.413   3.046   2.171  1.00 94.65           C  
ATOM   3677  HA  LEU A 232      12.020   2.212   1.818  1.00 94.65           H  
ATOM   3678  C   LEU A 232      12.191   4.332   1.842  1.00 94.65           C  
ATOM   3679  CB  LEU A 232      10.037   2.967   1.483  1.00 94.65           C  
ATOM   3680  HB2 LEU A 232       9.404   3.785   1.827  1.00 94.65           H  
ATOM   3681  HB3 LEU A 232       9.573   2.038   1.815  1.00 94.65           H  
ATOM   3682  O   LEU A 232      13.054   4.311   0.968  1.00 94.65           O  
ATOM   3683  CG  LEU A 232      10.081   2.962  -0.060  1.00 94.65           C  
ATOM   3684  HG  LEU A 232      10.976   2.441  -0.400  1.00 94.65           H  
ATOM   3685  CD1 LEU A 232       8.858   2.217  -0.601  1.00 94.65           C  
ATOM   3686 HD11 LEU A 232       8.879   1.186  -0.248  1.00 94.65           H  
ATOM   3687 HD12 LEU A 232       7.943   2.701  -0.260  1.00 94.65           H  
ATOM   3688 HD13 LEU A 232       8.886   2.207  -1.690  1.00 94.65           H  
ATOM   3689  CD2 LEU A 232      10.045   4.367  -0.672  1.00 94.65           C  
ATOM   3690 HD21 LEU A 232       9.160   4.907  -0.336  1.00 94.65           H  
ATOM   3691 HD22 LEU A 232      10.936   4.930  -0.398  1.00 94.65           H  
ATOM   3692 HD23 LEU A 232      10.033   4.294  -1.760  1.00 94.65           H  
ATOM   3693  N   VAL A 233      11.920   5.435   2.548  1.00 95.51           N  
ATOM   3694  H   VAL A 233      11.275   5.355   3.321  1.00 95.51           H  
ATOM   3695  CA  VAL A 233      12.582   6.734   2.326  1.00 95.51           C  
ATOM   3696  HA  VAL A 233      12.639   6.915   1.253  1.00 95.51           H  
ATOM   3697  C   VAL A 233      14.026   6.722   2.835  1.00 95.51           C  
ATOM   3698  CB  VAL A 233      11.761   7.881   2.950  1.00 95.51           C  
ATOM   3699  HB  VAL A 233      11.552   7.648   3.994  1.00 95.51           H  
ATOM   3700  O   VAL A 233      14.901   7.262   2.168  1.00 95.51           O  
ATOM   3701  CG1 VAL A 233      12.474   9.239   2.893  1.00 95.51           C  
ATOM   3702 HG11 VAL A 233      11.816  10.021   3.272  1.00 95.51           H  
ATOM   3703 HG12 VAL A 233      13.369   9.221   3.514  1.00 95.51           H  
ATOM   3704 HG13 VAL A 233      12.758   9.471   1.867  1.00 95.51           H  
ATOM   3705  CG2 VAL A 233      10.431   8.038   2.197  1.00 95.51           C  
ATOM   3706 HG21 VAL A 233      10.617   8.293   1.154  1.00 95.51           H  
ATOM   3707 HG22 VAL A 233       9.860   7.110   2.244  1.00 95.51           H  
ATOM   3708 HG23 VAL A 233       9.836   8.824   2.664  1.00 95.51           H  
ATOM   3709  N   THR A 234      14.309   6.059   3.957  1.00 95.58           N  
ATOM   3710  H   THR A 234      13.545   5.680   4.497  1.00 95.58           H  
ATOM   3711  CA  THR A 234      15.671   5.841   4.463  1.00 95.58           C  
ATOM   3712  HA  THR A 234      16.188   6.799   4.506  1.00 95.58           H  
ATOM   3713  C   THR A 234      16.469   4.941   3.520  1.00 95.58           C  
ATOM   3714  CB  THR A 234      15.633   5.248   5.881  1.00 95.58           C  
ATOM   3715  HB  THR A 234      15.076   4.311   5.866  1.00 95.58           H  
ATOM   3716  O   THR A 234      17.609   5.273   3.205  1.00 95.58           O  
ATOM   3717  CG2 THR A 234      17.019   4.998   6.473  1.00 95.58           C  
ATOM   3718 HG21 THR A 234      17.629   5.899   6.409  1.00 95.58           H  
ATOM   3719 HG22 THR A 234      16.925   4.695   7.516  1.00 95.58           H  
ATOM   3720 HG23 THR A 234      17.514   4.193   5.930  1.00 95.58           H  
ATOM   3721  OG1 THR A 234      14.993   6.146   6.759  1.00 95.58           O  
ATOM   3722  HG1 THR A 234      15.607   6.864   6.929  1.00 95.58           H  
ATOM   3723  N   ALA A 235      15.873   3.858   3.003  1.00 94.36           N  
ATOM   3724  H   ALA A 235      14.945   3.605   3.312  1.00 94.36           H  
ATOM   3725  CA  ALA A 235      16.521   3.010   2.002  1.00 94.36           C  
ATOM   3726  HA  ALA A 235      17.477   2.671   2.402  1.00 94.36           H  
ATOM   3727  C   ALA A 235      16.825   3.781   0.703  1.00 94.36           C  
ATOM   3728  CB  ALA A 235      15.646   1.777   1.753  1.00 94.36           C  
ATOM   3729  HB1 ALA A 235      14.676   2.075   1.355  1.00 94.36           H  
ATOM   3730  HB2 ALA A 235      16.148   1.126   1.037  1.00 94.36           H  
ATOM   3731  HB3 ALA A 235      15.501   1.231   2.685  1.00 94.36           H  
ATOM   3732  O   ALA A 235      17.938   3.695   0.194  1.00 94.36           O  
ATOM   3733  N   TRP A 236      15.887   4.604   0.214  1.00 93.93           N  
ATOM   3734  H   TRP A 236      14.977   4.618   0.652  1.00 93.93           H  
ATOM   3735  CA  TRP A 236      16.123   5.497  -0.930  1.00 93.93           C  
ATOM   3736  HA  TRP A 236      16.483   4.905  -1.771  1.00 93.93           H  
ATOM   3737  C   TRP A 236      17.212   6.538  -0.649  1.00 93.93           C  
ATOM   3738  CB  TRP A 236      14.817   6.189  -1.351  1.00 93.93           C  
ATOM   3739  HB2 TRP A 236      14.203   6.393  -0.474  1.00 93.93           H  
ATOM   3740  HB3 TRP A 236      15.069   7.153  -1.793  1.00 93.93           H  
ATOM   3741  O   TRP A 236      18.083   6.735  -1.488  1.00 93.93           O  
ATOM   3742  CG  TRP A 236      14.002   5.447  -2.366  1.00 93.93           C  
ATOM   3743  CD1 TRP A 236      13.617   4.155  -2.275  1.00 93.93           C  
ATOM   3744  HD1 TRP A 236      13.845   3.513  -1.437  1.00 93.93           H  
ATOM   3745  CD2 TRP A 236      13.519   5.916  -3.664  1.00 93.93           C  
ATOM   3746  CE2 TRP A 236      12.869   4.828  -4.323  1.00 93.93           C  
ATOM   3747  CE3 TRP A 236      13.588   7.140  -4.365  1.00 93.93           C  
ATOM   3748  HE3 TRP A 236      14.090   7.981  -3.910  1.00 93.93           H  
ATOM   3749  NE1 TRP A 236      12.957   3.782  -3.430  1.00 93.93           N  
ATOM   3750  HE1 TRP A 236      12.666   2.834  -3.621  1.00 93.93           H  
ATOM   3751  CH2 TRP A 236      12.418   6.175  -6.283  1.00 93.93           C  
ATOM   3752  HH2 TRP A 236      12.026   6.278  -7.284  1.00 93.93           H  
ATOM   3753  CZ2 TRP A 236      12.327   4.944  -5.611  1.00 93.93           C  
ATOM   3754  HZ2 TRP A 236      11.866   4.092  -6.089  1.00 93.93           H  
ATOM   3755  CZ3 TRP A 236      13.044   7.270  -5.659  1.00 93.93           C  
ATOM   3756  HZ3 TRP A 236      13.130   8.209  -6.185  1.00 93.93           H  
ATOM   3757  N   TYR A 237      17.197   7.189   0.516  1.00 96.31           N  
ATOM   3758  H   TYR A 237      16.442   7.009   1.163  1.00 96.31           H  
ATOM   3759  CA  TYR A 237      18.188   8.207   0.874  1.00 96.31           C  
ATOM   3760  HA  TYR A 237      18.190   8.978   0.104  1.00 96.31           H  
ATOM   3761  C   TYR A 237      19.607   7.628   0.929  1.00 96.31           C  
ATOM   3762  CB  TYR A 237      17.795   8.859   2.207  1.00 96.31           C  
ATOM   3763  HB2 TYR A 237      16.828   9.347   2.090  1.00 96.31           H  
ATOM   3764  HB3 TYR A 237      17.682   8.083   2.965  1.00 96.31           H  
ATOM   3765  O   TYR A 237      20.514   8.182   0.310  1.00 96.31           O  
ATOM   3766  CG  TYR A 237      18.800   9.884   2.698  1.00 96.31           C  
ATOM   3767  CD1 TYR A 237      19.714   9.545   3.717  1.00 96.31           C  
ATOM   3768  HD1 TYR A 237      19.692   8.562   4.164  1.00 96.31           H  
ATOM   3769  CD2 TYR A 237      18.855  11.158   2.099  1.00 96.31           C  
ATOM   3770  HD2 TYR A 237      18.169  11.409   1.304  1.00 96.31           H  
ATOM   3771  CE1 TYR A 237      20.681  10.479   4.134  1.00 96.31           C  
ATOM   3772  HE1 TYR A 237      21.397  10.227   4.902  1.00 96.31           H  
ATOM   3773  CE2 TYR A 237      19.824  12.093   2.512  1.00 96.31           C  
ATOM   3774  HE2 TYR A 237      19.878  13.063   2.041  1.00 96.31           H  
ATOM   3775  OH  TYR A 237      21.689  12.638   3.929  1.00 96.31           O  
ATOM   3776  HH  TYR A 237      21.678  13.448   3.413  1.00 96.31           H  
ATOM   3777  CZ  TYR A 237      20.742  11.751   3.530  1.00 96.31           C  
ATOM   3778  N   ILE A 238      19.795   6.489   1.604  1.00 96.04           N  
ATOM   3779  H   ILE A 238      19.008   6.063   2.072  1.00 96.04           H  
ATOM   3780  CA  ILE A 238      21.107   5.833   1.691  1.00 96.04           C  
ATOM   3781  HA  ILE A 238      21.849   6.596   1.925  1.00 96.04           H  
ATOM   3782  C   ILE A 238      21.507   5.238   0.332  1.00 96.04           C  
ATOM   3783  CB  ILE A 238      21.141   4.792   2.835  1.00 96.04           C  
ATOM   3784  HB  ILE A 238      20.395   4.025   2.630  1.00 96.04           H  
ATOM   3785  O   ILE A 238      22.664   5.365  -0.057  1.00 96.04           O  
ATOM   3786  CG1 ILE A 238      20.825   5.451   4.202  1.00 96.04           C  
ATOM   3787 HG12 ILE A 238      19.924   6.060   4.123  1.00 96.04           H  
ATOM   3788 HG13 ILE A 238      21.643   6.114   4.483  1.00 96.04           H  
ATOM   3789  CG2 ILE A 238      22.532   4.135   2.897  1.00 96.04           C  
ATOM   3790 HG21 ILE A 238      22.736   3.579   1.981  1.00 96.04           H  
ATOM   3791 HG22 ILE A 238      22.589   3.423   3.721  1.00 96.04           H  
ATOM   3792 HG23 ILE A 238      23.305   4.892   3.031  1.00 96.04           H  
ATOM   3793  CD1 ILE A 238      20.583   4.445   5.335  1.00 96.04           C  
ATOM   3794 HD11 ILE A 238      21.502   3.915   5.585  1.00 96.04           H  
ATOM   3795 HD12 ILE A 238      20.244   4.979   6.222  1.00 96.04           H  
ATOM   3796 HD13 ILE A 238      19.818   3.728   5.035  1.00 96.04           H  
ATOM   3797  N   GLY A 239      20.566   4.671  -0.432  1.00 95.47           N  
ATOM   3798  H   GLY A 239      19.634   4.566  -0.059  1.00 95.47           H  
ATOM   3799  CA  GLY A 239      20.812   4.169  -1.787  1.00 95.47           C  
ATOM   3800  HA2 GLY A 239      21.568   3.384  -1.753  1.00 95.47           H  
ATOM   3801  HA3 GLY A 239      19.888   3.744  -2.182  1.00 95.47           H  
ATOM   3802  C   GLY A 239      21.289   5.258  -2.752  1.00 95.47           C  
ATOM   3803  O   GLY A 239      22.312   5.083  -3.410  1.00 95.47           O  
ATOM   3804  N   PHE A 240      20.624   6.417  -2.789  1.00 95.74           N  
ATOM   3805  H   PHE A 240      19.789   6.519  -2.229  1.00 95.74           H  
ATOM   3806  CA  PHE A 240      21.055   7.545  -3.621  1.00 95.74           C  
ATOM   3807  HA  PHE A 240      21.299   7.158  -4.609  1.00 95.74           H  
ATOM   3808  C   PHE A 240      22.340   8.210  -3.112  1.00 95.74           C  
ATOM   3809  CB  PHE A 240      19.916   8.562  -3.798  1.00 95.74           C  
ATOM   3810  HB2 PHE A 240      19.335   8.641  -2.880  1.00 95.74           H  
ATOM   3811  HB3 PHE A 240      20.352   9.543  -3.984  1.00 95.74           H  
ATOM   3812  O   PHE A 240      23.174   8.584  -3.931  1.00 95.74           O  
ATOM   3813  CG  PHE A 240      19.013   8.237  -4.974  1.00 95.74           C  
ATOM   3814  CD1 PHE A 240      19.435   8.563  -6.278  1.00 95.74           C  
ATOM   3815  HD1 PHE A 240      20.386   9.050  -6.433  1.00 95.74           H  
ATOM   3816  CD2 PHE A 240      17.779   7.585  -4.786  1.00 95.74           C  
ATOM   3817  HD2 PHE A 240      17.452   7.319  -3.792  1.00 95.74           H  
ATOM   3818  CE1 PHE A 240      18.630   8.239  -7.385  1.00 95.74           C  
ATOM   3819  HE1 PHE A 240      18.965   8.479  -8.383  1.00 95.74           H  
ATOM   3820  CE2 PHE A 240      16.975   7.258  -5.893  1.00 95.74           C  
ATOM   3821  HE2 PHE A 240      16.039   6.740  -5.747  1.00 95.74           H  
ATOM   3822  CZ  PHE A 240      17.400   7.586  -7.192  1.00 95.74           C  
ATOM   3823  HZ  PHE A 240      16.790   7.324  -8.044  1.00 95.74           H  
ATOM   3824  N   LEU A 241      22.560   8.312  -1.796  1.00 95.97           N  
ATOM   3825  H   LEU A 241      21.834   8.034  -1.152  1.00 95.97           H  
ATOM   3826  CA  LEU A 241      23.836   8.790  -1.247  1.00 95.97           C  
ATOM   3827  HA  LEU A 241      24.054   9.762  -1.691  1.00 95.97           H  
ATOM   3828  C   LEU A 241      24.994   7.848  -1.622  1.00 95.97           C  
ATOM   3829  CB  LEU A 241      23.684   8.962   0.276  1.00 95.97           C  
ATOM   3830  HB2 LEU A 241      22.875   9.668   0.464  1.00 95.97           H  
ATOM   3831  HB3 LEU A 241      23.397   8.003   0.706  1.00 95.97           H  
ATOM   3832  O   LEU A 241      26.053   8.307  -2.046  1.00 95.97           O  
ATOM   3833  CG  LEU A 241      24.948   9.457   1.004  1.00 95.97           C  
ATOM   3834  HG  LEU A 241      25.746   8.725   0.883  1.00 95.97           H  
ATOM   3835  CD1 LEU A 241      25.436  10.813   0.489  1.00 95.97           C  
ATOM   3836 HD11 LEU A 241      26.279  11.152   1.090  1.00 95.97           H  
ATOM   3837 HD12 LEU A 241      25.777  10.719  -0.542  1.00 95.97           H  
ATOM   3838 HD13 LEU A 241      24.633  11.548   0.545  1.00 95.97           H  
ATOM   3839  CD2 LEU A 241      24.646   9.593   2.497  1.00 95.97           C  
ATOM   3840 HD21 LEU A 241      23.863  10.334   2.658  1.00 95.97           H  
ATOM   3841 HD22 LEU A 241      25.548   9.901   3.027  1.00 95.97           H  
ATOM   3842 HD23 LEU A 241      24.321   8.631   2.895  1.00 95.97           H  
ATOM   3843  N   CYS A 242      24.771   6.535  -1.537  1.00 95.10           N  
ATOM   3844  H   CYS A 242      23.886   6.225  -1.163  1.00 95.10           H  
ATOM   3845  CA  CYS A 242      25.714   5.510  -1.976  1.00 95.10           C  
ATOM   3846  HA  CYS A 242      26.664   5.668  -1.465  1.00 95.10           H  
ATOM   3847  C   CYS A 242      25.992   5.609  -3.484  1.00 95.10           C  
ATOM   3848  CB  CYS A 242      25.153   4.140  -1.565  1.00 95.10           C  
ATOM   3849  HB2 CYS A 242      24.932   4.144  -0.497  1.00 95.10           H  
ATOM   3850  HB3 CYS A 242      24.229   3.941  -2.108  1.00 95.10           H  
ATOM   3851  O   CYS A 242      27.153   5.608  -3.877  1.00 95.10           O  
ATOM   3852  SG  CYS A 242      26.347   2.823  -1.914  1.00 95.10           S  
ATOM   3853  HG  CYS A 242      27.359   3.305  -1.187  1.00 95.10           H  
ATOM   3854  N   LEU A 243      24.959   5.790  -4.317  1.00 96.45           N  
ATOM   3855  H   LEU A 243      24.027   5.742  -3.929  1.00 96.45           H  
ATOM   3856  CA  LEU A 243      25.087   5.985  -5.766  1.00 96.45           C  
ATOM   3857  HA  LEU A 243      25.620   5.128  -6.178  1.00 96.45           H  
ATOM   3858  C   LEU A 243      25.919   7.229  -6.103  1.00 96.45           C  
ATOM   3859  CB  LEU A 243      23.669   6.020  -6.375  1.00 96.45           C  
ATOM   3860  HB2 LEU A 243      23.140   6.905  -6.020  1.00 96.45           H  
ATOM   3861  HB3 LEU A 243      23.136   5.150  -5.991  1.00 96.45           H  
ATOM   3862  O   LEU A 243      26.843   7.138  -6.910  1.00 96.45           O  
ATOM   3863  CG  LEU A 243      23.591   5.972  -7.916  1.00 96.45           C  
ATOM   3864  HG  LEU A 243      24.329   5.270  -8.304  1.00 96.45           H  
ATOM   3865  CD1 LEU A 243      22.197   5.500  -8.331  1.00 96.45           C  
ATOM   3866 HD11 LEU A 243      21.434   6.142  -7.890  1.00 96.45           H  
ATOM   3867 HD12 LEU A 243      22.108   5.537  -9.416  1.00 96.45           H  
ATOM   3868 HD13 LEU A 243      22.048   4.470  -8.007  1.00 96.45           H  
ATOM   3869  CD2 LEU A 243      23.789   7.338  -8.573  1.00 96.45           C  
ATOM   3870 HD21 LEU A 243      23.671   7.245  -9.652  1.00 96.45           H  
ATOM   3871 HD22 LEU A 243      23.066   8.058  -8.189  1.00 96.45           H  
ATOM   3872 HD23 LEU A 243      24.799   7.706  -8.394  1.00 96.45           H  
ATOM   3873  N   ILE A 244      25.638   8.372  -5.469  1.00 97.15           N  
ATOM   3874  H   ILE A 244      24.860   8.373  -4.825  1.00 97.15           H  
ATOM   3875  CA  ILE A 244      26.375   9.630  -5.671  1.00 97.15           C  
ATOM   3876  HA  ILE A 244      26.328   9.892  -6.728  1.00 97.15           H  
ATOM   3877  C   ILE A 244      27.864   9.459  -5.335  1.00 97.15           C  
ATOM   3878  CB  ILE A 244      25.708  10.759  -4.844  1.00 97.15           C  
ATOM   3879  HB  ILE A 244      25.484  10.353  -3.857  1.00 97.15           H  
ATOM   3880  O   ILE A 244      28.713   9.855  -6.137  1.00 97.15           O  
ATOM   3881  CG1 ILE A 244      24.361  11.207  -5.463  1.00 97.15           C  
ATOM   3882 HG12 ILE A 244      23.837  11.825  -4.734  1.00 97.15           H  
ATOM   3883 HG13 ILE A 244      23.741  10.330  -5.651  1.00 97.15           H  
ATOM   3884  CG2 ILE A 244      26.619  11.979  -4.609  1.00 97.15           C  
ATOM   3885 HG21 ILE A 244      26.056  12.772  -4.116  1.00 97.15           H  
ATOM   3886 HG22 ILE A 244      27.011  12.355  -5.554  1.00 97.15           H  
ATOM   3887 HG23 ILE A 244      27.454  11.710  -3.962  1.00 97.15           H  
ATOM   3888  CD1 ILE A 244      24.447  11.996  -6.777  1.00 97.15           C  
ATOM   3889 HD11 ILE A 244      24.963  11.410  -7.538  1.00 97.15           H  
ATOM   3890 HD12 ILE A 244      24.973  12.939  -6.626  1.00 97.15           H  
ATOM   3891 HD13 ILE A 244      23.440  12.214  -7.131  1.00 97.15           H  
ATOM   3892  N   LEU A 245      28.176   8.832  -4.194  1.00 96.31           N  
ATOM   3893  H   LEU A 245      27.418   8.529  -3.599  1.00 96.31           H  
ATOM   3894  CA  LEU A 245      29.548   8.580  -3.738  1.00 96.31           C  
ATOM   3895  HA  LEU A 245      30.120   9.505  -3.815  1.00 96.31           H  
ATOM   3896  C   LEU A 245      30.278   7.552  -4.614  1.00 96.31           C  
ATOM   3897  CB  LEU A 245      29.519   8.122  -2.267  1.00 96.31           C  
ATOM   3898  HB2 LEU A 245      30.505   7.744  -1.998  1.00 96.31           H  
ATOM   3899  HB3 LEU A 245      28.816   7.294  -2.179  1.00 96.31           H  
ATOM   3900  O   LEU A 245      31.417   7.798  -5.003  1.00 96.31           O  
ATOM   3901  CG  LEU A 245      29.130   9.226  -1.265  1.00 96.31           C  
ATOM   3902  HG  LEU A 245      28.214   9.721  -1.590  1.00 96.31           H  
ATOM   3903  CD1 LEU A 245      28.882   8.607   0.111  1.00 96.31           C  
ATOM   3904 HD11 LEU A 245      28.588   9.384   0.816  1.00 96.31           H  
ATOM   3905 HD12 LEU A 245      29.787   8.116   0.469  1.00 96.31           H  
ATOM   3906 HD13 LEU A 245      28.076   7.876   0.039  1.00 96.31           H  
ATOM   3907  CD2 LEU A 245      30.226  10.285  -1.119  1.00 96.31           C  
ATOM   3908 HD21 LEU A 245      30.370  10.810  -2.063  1.00 96.31           H  
ATOM   3909 HD22 LEU A 245      29.934  11.015  -0.364  1.00 96.31           H  
ATOM   3910 HD23 LEU A 245      31.164   9.816  -0.821  1.00 96.31           H  
ATOM   3911  N   ALA A 246      29.621   6.447  -4.975  1.00 95.57           N  
ATOM   3912  H   ALA A 246      28.693   6.296  -4.606  1.00 95.57           H  
ATOM   3913  CA  ALA A 246      30.164   5.425  -5.868  1.00 95.57           C  
ATOM   3914  HA  ALA A 246      31.068   5.006  -5.426  1.00 95.57           H  
ATOM   3915  C   ALA A 246      30.527   6.017  -7.235  1.00 95.57           C  
ATOM   3916  CB  ALA A 246      29.119   4.313  -6.026  1.00 95.57           C  
ATOM   3917  HB1 ALA A 246      28.223   4.698  -6.511  1.00 95.57           H  
ATOM   3918  HB2 ALA A 246      28.844   3.923  -5.046  1.00 95.57           H  
ATOM   3919  HB3 ALA A 246      29.533   3.508  -6.633  1.00 95.57           H  
ATOM   3920  O   ALA A 246      31.643   5.840  -7.715  1.00 95.57           O  
ATOM   3921  N   SER A 247      29.605   6.789  -7.819  1.00 96.68           N  
ATOM   3922  H   SER A 247      28.711   6.888  -7.358  1.00 96.68           H  
ATOM   3923  CA  SER A 247      29.812   7.476  -9.098  1.00 96.68           C  
ATOM   3924  HA  SER A 247      30.045   6.739  -9.867  1.00 96.68           H  
ATOM   3925  C   SER A 247      30.977   8.463  -9.014  1.00 96.68           C  
ATOM   3926  CB  SER A 247      28.546   8.232  -9.521  1.00 96.68           C  
ATOM   3927  HB2 SER A 247      28.377   9.072  -8.847  1.00 96.68           H  
ATOM   3928  HB3 SER A 247      28.682   8.620 -10.530  1.00 96.68           H  
ATOM   3929  O   SER A 247      31.774   8.554  -9.938  1.00 96.68           O  
ATOM   3930  OG  SER A 247      27.409   7.392  -9.494  1.00 96.68           O  
ATOM   3931  HG  SER A 247      27.180   7.233  -8.576  1.00 96.68           H  
ATOM   3932  N   PHE A 248      31.112   9.190  -7.900  1.00 96.50           N  
ATOM   3933  H   PHE A 248      30.447   9.062  -7.151  1.00 96.50           H  
ATOM   3934  CA  PHE A 248      32.153  10.209  -7.735  1.00 96.50           C  
ATOM   3935  HA  PHE A 248      32.205  10.813  -8.641  1.00 96.50           H  
ATOM   3936  C   PHE A 248      33.543   9.596  -7.544  1.00 96.50           C  
ATOM   3937  CB  PHE A 248      31.764  11.122  -6.565  1.00 96.50           C  
ATOM   3938  HB2 PHE A 248      31.746  10.537  -5.646  1.00 96.50           H  
ATOM   3939  HB3 PHE A 248      30.754  11.498  -6.730  1.00 96.50           H  
ATOM   3940  O   PHE A 248      34.506  10.044  -8.160  1.00 96.50           O  
ATOM   3941  CG  PHE A 248      32.671  12.320  -6.382  1.00 96.50           C  
ATOM   3942  CD1 PHE A 248      33.573  12.370  -5.303  1.00 96.50           C  
ATOM   3943  HD1 PHE A 248      33.642  11.542  -4.613  1.00 96.50           H  
ATOM   3944  CD2 PHE A 248      32.605  13.395  -7.289  1.00 96.50           C  
ATOM   3945  HD2 PHE A 248      31.919  13.359  -8.123  1.00 96.50           H  
ATOM   3946  CE1 PHE A 248      34.393  13.498  -5.123  1.00 96.50           C  
ATOM   3947  HE1 PHE A 248      35.091  13.533  -4.299  1.00 96.50           H  
ATOM   3948  CE2 PHE A 248      33.432  14.518  -7.114  1.00 96.50           C  
ATOM   3949  HE2 PHE A 248      33.386  15.339  -7.815  1.00 96.50           H  
ATOM   3950  CZ  PHE A 248      34.322  14.572  -6.027  1.00 96.50           C  
ATOM   3951  HZ  PHE A 248      34.962  15.432  -5.895  1.00 96.50           H  
ATOM   3952  N   LEU A 249      33.643   8.542  -6.734  1.00 96.28           N  
ATOM   3953  H   LEU A 249      32.812   8.213  -6.263  1.00 96.28           H  
ATOM   3954  CA  LEU A 249      34.909   7.871  -6.452  1.00 96.28           C  
ATOM   3955  HA  LEU A 249      35.682   8.627  -6.316  1.00 96.28           H  
ATOM   3956  C   LEU A 249      35.385   7.010  -7.629  1.00 96.28           C  
ATOM   3957  CB  LEU A 249      34.768   7.076  -5.143  1.00 96.28           C  
ATOM   3958  HB2 LEU A 249      33.900   6.423  -5.224  1.00 96.28           H  
ATOM   3959  HB3 LEU A 249      35.649   6.448  -5.011  1.00 96.28           H  
ATOM   3960  O   LEU A 249      36.583   6.975  -7.882  1.00 96.28           O  
ATOM   3961  CG  LEU A 249      34.620   7.987  -3.906  1.00 96.28           C  
ATOM   3962  HG  LEU A 249      33.863   8.750  -4.089  1.00 96.28           H  
ATOM   3963  CD1 LEU A 249      34.165   7.165  -2.704  1.00 96.28           C  
ATOM   3964 HD11 LEU A 249      34.894   6.385  -2.485  1.00 96.28           H  
ATOM   3965 HD12 LEU A 249      34.049   7.814  -1.835  1.00 96.28           H  
ATOM   3966 HD13 LEU A 249      33.199   6.717  -2.937  1.00 96.28           H  
ATOM   3967  CD2 LEU A 249      35.932   8.686  -3.542  1.00 96.28           C  
ATOM   3968 HD21 LEU A 249      35.820   9.225  -2.601  1.00 96.28           H  
ATOM   3969 HD22 LEU A 249      36.203   9.403  -4.317  1.00 96.28           H  
ATOM   3970 HD23 LEU A 249      36.732   7.952  -3.441  1.00 96.28           H  
ATOM   3971  N   VAL A 250      34.479   6.384  -8.391  1.00 96.27           N  
ATOM   3972  H   VAL A 250      33.507   6.408  -8.121  1.00 96.27           H  
ATOM   3973  CA  VAL A 250      34.846   5.698  -9.645  1.00 96.27           C  
ATOM   3974  HA  VAL A 250      35.745   5.110  -9.461  1.00 96.27           H  
ATOM   3975  C   VAL A 250      35.230   6.710 -10.730  1.00 96.27           C  
ATOM   3976  CB  VAL A 250      33.750   4.710 -10.095  1.00 96.27           C  
ATOM   3977  HB  VAL A 250      32.792   5.229 -10.138  1.00 96.27           H  
ATOM   3978  O   VAL A 250      36.249   6.516 -11.377  1.00 96.27           O  
ATOM   3979  CG1 VAL A 250      34.022   4.085 -11.469  1.00 96.27           C  
ATOM   3980 HG11 VAL A 250      34.990   3.585 -11.468  1.00 96.27           H  
ATOM   3981 HG12 VAL A 250      34.019   4.851 -12.244  1.00 96.27           H  
ATOM   3982 HG13 VAL A 250      33.244   3.360 -11.710  1.00 96.27           H  
ATOM   3983  CG2 VAL A 250      33.657   3.552  -9.088  1.00 96.27           C  
ATOM   3984 HG21 VAL A 250      33.416   3.928  -8.094  1.00 96.27           H  
ATOM   3985 HG22 VAL A 250      32.876   2.857  -9.396  1.00 96.27           H  
ATOM   3986 HG23 VAL A 250      34.607   3.019  -9.049  1.00 96.27           H  
ATOM   3987  N   TYR A 251      34.524   7.839 -10.872  1.00 96.69           N  
ATOM   3988  H   TYR A 251      33.680   7.963 -10.330  1.00 96.69           H  
ATOM   3989  CA  TYR A 251      34.920   8.920 -11.792  1.00 96.69           C  
ATOM   3990  HA  TYR A 251      34.910   8.533 -12.811  1.00 96.69           H  
ATOM   3991  C   TYR A 251      36.347   9.431 -11.514  1.00 96.69           C  
ATOM   3992  CB  TYR A 251      33.885  10.051 -11.687  1.00 96.69           C  
ATOM   3993  HB2 TYR A 251      32.909   9.646 -11.954  1.00 96.69           H  
ATOM   3994  HB3 TYR A 251      33.825  10.376 -10.648  1.00 96.69           H  
ATOM   3995  O   TYR A 251      37.159   9.531 -12.433  1.00 96.69           O  
ATOM   3996  CG  TYR A 251      34.115  11.266 -12.563  1.00 96.69           C  
ATOM   3997  CD1 TYR A 251      34.347  12.526 -11.977  1.00 96.69           C  
ATOM   3998  HD1 TYR A 251      34.417  12.613 -10.903  1.00 96.69           H  
ATOM   3999  CD2 TYR A 251      34.044  11.149 -13.963  1.00 96.69           C  
ATOM   4000  HD2 TYR A 251      33.879  10.188 -14.428  1.00 96.69           H  
ATOM   4001  CE1 TYR A 251      34.498  13.669 -12.787  1.00 96.69           C  
ATOM   4002  HE1 TYR A 251      34.681  14.630 -12.330  1.00 96.69           H  
ATOM   4003  CE2 TYR A 251      34.204  12.287 -14.774  1.00 96.69           C  
ATOM   4004  HE2 TYR A 251      34.173  12.187 -15.849  1.00 96.69           H  
ATOM   4005  OH  TYR A 251      34.550  14.660 -14.970  1.00 96.69           O  
ATOM   4006  HH  TYR A 251      34.723  15.437 -14.433  1.00 96.69           H  
ATOM   4007  CZ  TYR A 251      34.422  13.550 -14.192  1.00 96.69           C  
ATOM   4008  N   LEU A 252      36.689   9.661 -10.240  1.00 95.79           N  
ATOM   4009  H   LEU A 252      35.977   9.553  -9.531  1.00 95.79           H  
ATOM   4010  CA  LEU A 252      38.037  10.054  -9.802  1.00 95.79           C  
ATOM   4011  HA  LEU A 252      38.416  10.808 -10.492  1.00 95.79           H  
ATOM   4012  C   LEU A 252      39.087   8.924  -9.840  1.00 95.79           C  
ATOM   4013  CB  LEU A 252      37.953  10.665  -8.390  1.00 95.79           C  
ATOM   4014  HB2 LEU A 252      38.965  10.796  -8.008  1.00 95.79           H  
ATOM   4015  HB3 LEU A 252      37.449   9.953  -7.736  1.00 95.79           H  
ATOM   4016  O   LEU A 252      40.252   9.183  -9.551  1.00 95.79           O  
ATOM   4017  CG  LEU A 252      37.241  12.026  -8.299  1.00 95.79           C  
ATOM   4018  HG  LEU A 252      36.213  11.938  -8.652  1.00 95.79           H  
ATOM   4019  CD1 LEU A 252      37.223  12.468  -6.836  1.00 95.79           C  
ATOM   4020 HD11 LEU A 252      36.746  13.445  -6.756  1.00 95.79           H  
ATOM   4021 HD12 LEU A 252      38.240  12.531  -6.451  1.00 95.79           H  
ATOM   4022 HD13 LEU A 252      36.654  11.747  -6.249  1.00 95.79           H  
ATOM   4023  CD2 LEU A 252      37.937  13.121  -9.112  1.00 95.79           C  
ATOM   4024 HD21 LEU A 252      38.988  13.183  -8.828  1.00 95.79           H  
ATOM   4025 HD22 LEU A 252      37.453  14.081  -8.932  1.00 95.79           H  
ATOM   4026 HD23 LEU A 252      37.866  12.896 -10.176  1.00 95.79           H  
ATOM   4027  N   ALA A 253      38.701   7.697 -10.194  1.00 95.38           N  
ATOM   4028  H   ALA A 253      37.722   7.541 -10.390  1.00 95.38           H  
ATOM   4029  CA  ALA A 253      39.587   6.539 -10.328  1.00 95.38           C  
ATOM   4030  HA  ALA A 253      40.613   6.853 -10.136  1.00 95.38           H  
ATOM   4031  C   ALA A 253      39.588   5.938 -11.748  1.00 95.38           C  
ATOM   4032  CB  ALA A 253      39.201   5.518  -9.253  1.00 95.38           C  
ATOM   4033  HB1 ALA A 253      39.899   4.681  -9.274  1.00 95.38           H  
ATOM   4034  HB2 ALA A 253      39.237   5.988  -8.270  1.00 95.38           H  
ATOM   4035  HB3 ALA A 253      38.192   5.151  -9.442  1.00 95.38           H  
ATOM   4036  O   ALA A 253      40.126   4.851 -11.948  1.00 95.38           O  
ATOM   4037  N   GLU A 254      38.975   6.622 -12.719  1.00 95.43           N  
ATOM   4038  H   GLU A 254      38.498   7.469 -12.444  1.00 95.43           H  
ATOM   4039  CA  GLU A 254      38.840   6.184 -14.117  1.00 95.43           C  
ATOM   4040  HA  GLU A 254      39.553   5.389 -14.337  1.00 95.43           H  
ATOM   4041  C   GLU A 254      39.124   7.315 -15.121  1.00 95.43           C  
ATOM   4042  CB  GLU A 254      37.415   5.651 -14.344  1.00 95.43           C  
ATOM   4043  HB2 GLU A 254      36.705   6.406 -14.008  1.00 95.43           H  
ATOM   4044  HB3 GLU A 254      37.256   5.529 -15.416  1.00 95.43           H  
ATOM   4045  O   GLU A 254      39.679   7.063 -16.193  1.00 95.43           O  
ATOM   4046  CG  GLU A 254      37.093   4.320 -13.636  1.00 95.43           C  
ATOM   4047  HG2 GLU A 254      36.015   4.166 -13.692  1.00 95.43           H  
ATOM   4048  HG3 GLU A 254      37.357   4.381 -12.580  1.00 95.43           H  
ATOM   4049  CD  GLU A 254      37.770   3.105 -14.277  1.00 95.43           C  
ATOM   4050  OE1 GLU A 254      38.106   2.128 -13.575  1.00 95.43           O  
ATOM   4051  OE2 GLU A 254      37.862   3.046 -15.520  1.00 95.43           O  
ATOM   4052  N   LYS A 255      38.778   8.574 -14.803  1.00 92.21           N  
ATOM   4053  H   LYS A 255      38.327   8.759 -13.919  1.00 92.21           H  
ATOM   4054  CA  LYS A 255      38.976   9.691 -15.735  1.00 92.21           C  
ATOM   4055  HA  LYS A 255      38.503   9.404 -16.674  1.00 92.21           H  
ATOM   4056  C   LYS A 255      40.464   9.928 -16.021  1.00 92.21           C  
ATOM   4057  CB  LYS A 255      38.264  10.962 -15.236  1.00 92.21           C  
ATOM   4058  HB2 LYS A 255      37.195  10.760 -15.166  1.00 92.21           H  
ATOM   4059  HB3 LYS A 255      38.639  11.248 -14.253  1.00 92.21           H  
ATOM   4060  O   LYS A 255      41.225  10.289 -15.130  1.00 92.21           O  
ATOM   4061  CG  LYS A 255      38.514  12.099 -16.241  1.00 92.21           C  
ATOM   4062  HG2 LYS A 255      38.443  11.689 -17.248  1.00 92.21           H  
ATOM   4063  HG3 LYS A 255      39.523  12.485 -16.098  1.00 92.21           H  
ATOM   4064  CD  LYS A 255      37.523  13.260 -16.152  1.00 92.21           C  
ATOM   4065  HD2 LYS A 255      36.522  12.863 -16.318  1.00 92.21           H  
ATOM   4066  HD3 LYS A 255      37.574  13.736 -15.173  1.00 92.21           H  
ATOM   4067  CE  LYS A 255      37.891  14.258 -17.265  1.00 92.21           C  
ATOM   4068  HE2 LYS A 255      38.529  13.743 -17.983  1.00 92.21           H  
ATOM   4069  HE3 LYS A 255      38.469  15.077 -16.838  1.00 92.21           H  
ATOM   4070  NZ  LYS A 255      36.709  14.770 -17.998  1.00 92.21           N  
ATOM   4071  HZ1 LYS A 255      36.017  15.206 -17.406  1.00 92.21           H  
ATOM   4072  HZ2 LYS A 255      36.196  14.013 -18.427  1.00 92.21           H  
ATOM   4073  HZ3 LYS A 255      36.940  15.329 -18.807  1.00 92.21           H  
ATOM   4074  N   GLY A 256      40.839   9.795 -17.294  1.00 89.21           N  
ATOM   4075  H   GLY A 256      40.143   9.468 -17.948  1.00 89.21           H  
ATOM   4076  CA  GLY A 256      42.221   9.906 -17.780  1.00 89.21           C  
ATOM   4077  HA2 GLY A 256      42.235  10.519 -18.682  1.00 89.21           H  
ATOM   4078  HA3 GLY A 256      42.843  10.391 -17.028  1.00 89.21           H  
ATOM   4079  C   GLY A 256      42.872   8.560 -18.117  1.00 89.21           C  
ATOM   4080  O   GLY A 256      43.816   8.538 -18.898  1.00 89.21           O  
ATOM   4081  N   GLU A 257      42.326   7.450 -17.611  1.00 89.20           N  
ATOM   4082  H   GLU A 257      41.582   7.541 -16.934  1.00 89.20           H  
ATOM   4083  CA  GLU A 257      42.689   6.080 -18.012  1.00 89.20           C  
ATOM   4084  HA  GLU A 257      43.564   6.101 -18.662  1.00 89.20           H  
ATOM   4085  C   GLU A 257      41.570   5.389 -18.823  1.00 89.20           C  
ATOM   4086  CB  GLU A 257      43.049   5.251 -16.764  1.00 89.20           C  
ATOM   4087  HB2 GLU A 257      42.256   5.375 -16.027  1.00 89.20           H  
ATOM   4088  HB3 GLU A 257      43.095   4.201 -17.052  1.00 89.20           H  
ATOM   4089  O   GLU A 257      41.811   4.348 -19.432  1.00 89.20           O  
ATOM   4090  CG  GLU A 257      44.399   5.630 -16.127  1.00 89.20           C  
ATOM   4091  HG2 GLU A 257      45.186   5.498 -16.870  1.00 89.20           H  
ATOM   4092  HG3 GLU A 257      44.374   6.685 -15.853  1.00 89.20           H  
ATOM   4093  CD  GLU A 257      44.734   4.781 -14.882  1.00 89.20           C  
ATOM   4094  OE1 GLU A 257      45.136   5.376 -13.856  1.00 89.20           O  
ATOM   4095  OE2 GLU A 257      44.594   3.535 -14.940  1.00 89.20           O  
ATOM   4096  N   ASN A 258      40.347   5.942 -18.840  1.00 89.48           N  
ATOM   4097  H   ASN A 258      40.177   6.725 -18.224  1.00 89.48           H  
ATOM   4098  CA  ASN A 258      39.183   5.316 -19.469  1.00 89.48           C  
ATOM   4099  HA  ASN A 258      39.521   4.679 -20.287  1.00 89.48           H  
ATOM   4100  C   ASN A 258      38.159   6.319 -20.048  1.00 89.48           C  
ATOM   4101  CB  ASN A 258      38.542   4.426 -18.393  1.00 89.48           C  
ATOM   4102  HB2 ASN A 258      39.297   3.759 -17.979  1.00 89.48           H  
ATOM   4103  HB3 ASN A 258      38.177   5.054 -17.580  1.00 89.48           H  
ATOM   4104  O   ASN A 258      37.434   6.992 -19.308  1.00 89.48           O  
ATOM   4105  CG  ASN A 258      37.396   3.575 -18.893  1.00 89.48           C  
ATOM   4106  ND2 ASN A 258      36.734   2.901 -17.992  1.00 89.48           N  
ATOM   4107 HD21 ASN A 258      35.994   2.269 -18.265  1.00 89.48           H  
ATOM   4108 HD22 ASN A 258      37.066   2.968 -17.041  1.00 89.48           H  
ATOM   4109  OD1 ASN A 258      37.101   3.468 -20.073  1.00 89.48           O  
ATOM   4110  N   ASP A 259      38.023   6.332 -21.376  1.00 90.87           N  
ATOM   4111  H   ASP A 259      38.747   5.891 -21.925  1.00 90.87           H  
ATOM   4112  CA  ASP A 259      37.046   7.095 -22.174  1.00 90.87           C  
ATOM   4113  HA  ASP A 259      37.306   8.153 -22.153  1.00 90.87           H  
ATOM   4114  C   ASP A 259      35.589   6.936 -21.701  1.00 90.87           C  
ATOM   4115  CB  ASP A 259      37.096   6.593 -23.633  1.00 90.87           C  
ATOM   4116  HB2 ASP A 259      36.822   5.538 -23.650  1.00 90.87           H  
ATOM   4117  HB3 ASP A 259      36.340   7.133 -24.203  1.00 90.87           H  
ATOM   4118  O   ASP A 259      34.754   7.816 -21.907  1.00 90.87           O  
ATOM   4119  CG  ASP A 259      38.445   6.749 -24.348  1.00 90.87           C  
ATOM   4120  OD1 ASP A 259      39.482   6.463 -23.709  1.00 90.87           O  
ATOM   4121  OD2 ASP A 259      38.411   7.094 -25.549  1.00 90.87           O  
ATOM   4122  N   HIS A 260      35.252   5.811 -21.060  1.00 91.54           N  
ATOM   4123  H   HIS A 260      35.972   5.121 -20.902  1.00 91.54           H  
ATOM   4124  CA  HIS A 260      33.893   5.525 -20.592  1.00 91.54           C  
ATOM   4125  HA  HIS A 260      33.212   5.653 -21.432  1.00 91.54           H  
ATOM   4126  C   HIS A 260      33.407   6.487 -19.490  1.00 91.54           C  
ATOM   4127  CB  HIS A 260      33.818   4.058 -20.133  1.00 91.54           C  
ATOM   4128  HB2 HIS A 260      32.814   3.856 -19.762  1.00 91.54           H  
ATOM   4129  HB3 HIS A 260      34.503   3.917 -19.297  1.00 91.54           H  
ATOM   4130  O   HIS A 260      32.200   6.553 -19.246  1.00 91.54           O  
ATOM   4131  CG  HIS A 260      34.139   3.041 -21.208  1.00 91.54           C  
ATOM   4132  CD2 HIS A 260      34.355   1.701 -21.021  1.00 91.54           C  
ATOM   4133  HD2 HIS A 260      34.327   1.174 -20.078  1.00 91.54           H  
ATOM   4134  ND1 HIS A 260      34.323   3.285 -22.553  1.00 91.54           N  
ATOM   4135  HD1 HIS A 260      34.348   4.194 -22.994  1.00 91.54           H  
ATOM   4136  CE1 HIS A 260      34.635   2.125 -23.153  1.00 91.54           C  
ATOM   4137  HE1 HIS A 260      34.870   2.009 -24.200  1.00 91.54           H  
ATOM   4138  NE2 HIS A 260      34.656   1.128 -22.258  1.00 91.54           N  
ATOM   4139  N   PHE A 261      34.310   7.245 -18.855  1.00 93.51           N  
ATOM   4140  H   PHE A 261      35.275   7.153 -19.136  1.00 93.51           H  
ATOM   4141  CA  PHE A 261      34.023   8.148 -17.735  1.00 93.51           C  
ATOM   4142  HA  PHE A 261      32.941   8.227 -17.622  1.00 93.51           H  
ATOM   4143  C   PHE A 261      34.511   9.584 -17.982  1.00 93.51           C  
ATOM   4144  CB  PHE A 261      34.571   7.541 -16.435  1.00 93.51           C  
ATOM   4145  HB2 PHE A 261      34.384   8.229 -15.610  1.00 93.51           H  
ATOM   4146  HB3 PHE A 261      35.651   7.423 -16.524  1.00 93.51           H  
ATOM   4147  O   PHE A 261      35.107  10.206 -17.102  1.00 93.51           O  
ATOM   4148  CG  PHE A 261      33.942   6.212 -16.079  1.00 93.51           C  
ATOM   4149  CD1 PHE A 261      32.685   6.167 -15.450  1.00 93.51           C  
ATOM   4150  HD1 PHE A 261      32.167   7.089 -15.233  1.00 93.51           H  
ATOM   4151  CD2 PHE A 261      34.601   5.017 -16.400  1.00 93.51           C  
ATOM   4152  HD2 PHE A 261      35.557   5.048 -16.901  1.00 93.51           H  
ATOM   4153  CE1 PHE A 261      32.105   4.929 -15.114  1.00 93.51           C  
ATOM   4154  HE1 PHE A 261      31.148   4.892 -14.615  1.00 93.51           H  
ATOM   4155  CE2 PHE A 261      34.017   3.785 -16.074  1.00 93.51           C  
ATOM   4156  HE2 PHE A 261      34.545   2.876 -16.325  1.00 93.51           H  
ATOM   4157  CZ  PHE A 261      32.773   3.734 -15.425  1.00 93.51           C  
ATOM   4158  HZ  PHE A 261      32.330   2.783 -15.168  1.00 93.51           H  
ATOM   4159  N   ASP A 262      34.250  10.137 -19.171  1.00 90.91           N  
ATOM   4160  H   ASP A 262      33.865   9.567 -19.910  1.00 90.91           H  
ATOM   4161  CA  ASP A 262      34.601  11.532 -19.462  1.00 90.91           C  
ATOM   4162  HA  ASP A 262      35.661  11.653 -19.239  1.00 90.91           H  
ATOM   4163  C   ASP A 262      33.837  12.535 -18.574  1.00 90.91           C  
ATOM   4164  CB  ASP A 262      34.418  11.841 -20.955  1.00 90.91           C  
ATOM   4165  HB2 ASP A 262      33.362  11.759 -21.208  1.00 90.91           H  
ATOM   4166  HB3 ASP A 262      34.971  11.105 -21.539  1.00 90.91           H  
ATOM   4167  O   ASP A 262      34.446  13.455 -18.030  1.00 90.91           O  
ATOM   4168  CG  ASP A 262      34.932  13.244 -21.321  1.00 90.91           C  
ATOM   4169  OD1 ASP A 262      35.798  13.784 -20.578  1.00 90.91           O  
ATOM   4170  OD2 ASP A 262      34.417  13.794 -22.317  1.00 90.91           O  
ATOM   4171  N   THR A 263      32.538  12.355 -18.310  1.00 94.40           N  
ATOM   4172  H   THR A 263      32.029  11.615 -18.773  1.00 94.40           H  
ATOM   4173  CA  THR A 263      31.798  13.234 -17.384  1.00 94.40           C  
ATOM   4174  HA  THR A 263      32.484  13.984 -16.993  1.00 94.40           H  
ATOM   4175  C   THR A 263      31.261  12.499 -16.156  1.00 94.40           C  
ATOM   4176  CB  THR A 263      30.684  14.040 -18.076  1.00 94.40           C  
ATOM   4177  HB  THR A 263      30.506  14.927 -17.468  1.00 94.40           H  
ATOM   4178  O   THR A 263      31.029  11.289 -16.153  1.00 94.40           O  
ATOM   4179  CG2 THR A 263      31.004  14.511 -19.494  1.00 94.40           C  
ATOM   4180 HG21 THR A 263      31.080  13.657 -20.168  1.00 94.40           H  
ATOM   4181 HG22 THR A 263      31.951  15.051 -19.501  1.00 94.40           H  
ATOM   4182 HG23 THR A 263      30.212  15.169 -19.849  1.00 94.40           H  
ATOM   4183  OG1 THR A 263      29.479  13.322 -18.099  1.00 94.40           O  
ATOM   4184  HG1 THR A 263      29.650  12.568 -18.667  1.00 94.40           H  
ATOM   4185  N   TYR A 264      30.972  13.260 -15.096  1.00 95.78           N  
ATOM   4186  H   TYR A 264      31.228  14.237 -15.114  1.00 95.78           H  
ATOM   4187  CA  TYR A 264      30.288  12.723 -13.918  1.00 95.78           C  
ATOM   4188  HA  TYR A 264      30.879  11.894 -13.530  1.00 95.78           H  
ATOM   4189  C   TYR A 264      28.889  12.166 -14.246  1.00 95.78           C  
ATOM   4190  CB  TYR A 264      30.211  13.810 -12.835  1.00 95.78           C  
ATOM   4191  HB2 TYR A 264      31.223  14.127 -12.584  1.00 95.78           H  
ATOM   4192  HB3 TYR A 264      29.680  14.673 -13.236  1.00 95.78           H  
ATOM   4193  O   TYR A 264      28.412  11.281 -13.543  1.00 95.78           O  
ATOM   4194  CG  TYR A 264      29.524  13.349 -11.561  1.00 95.78           C  
ATOM   4195  CD1 TYR A 264      28.241  13.827 -11.220  1.00 95.78           C  
ATOM   4196  HD1 TYR A 264      27.747  14.547 -11.856  1.00 95.78           H  
ATOM   4197  CD2 TYR A 264      30.152  12.390 -10.744  1.00 95.78           C  
ATOM   4198  HD2 TYR A 264      31.123  12.002 -11.015  1.00 95.78           H  
ATOM   4199  CE1 TYR A 264      27.588  13.347 -10.065  1.00 95.78           C  
ATOM   4200  HE1 TYR A 264      26.602  13.700  -9.800  1.00 95.78           H  
ATOM   4201  CE2 TYR A 264      29.498  11.912  -9.595  1.00 95.78           C  
ATOM   4202  HE2 TYR A 264      29.970  11.163  -8.976  1.00 95.78           H  
ATOM   4203  OH  TYR A 264      27.606  11.912  -8.132  1.00 95.78           O  
ATOM   4204  HH  TYR A 264      28.157  11.290  -7.652  1.00 95.78           H  
ATOM   4205  CZ  TYR A 264      28.219  12.385  -9.249  1.00 95.78           C  
ATOM   4206  N   ALA A 265      28.232  12.627 -15.320  1.00 96.90           N  
ATOM   4207  H   ALA A 265      28.707  13.248 -15.959  1.00 96.90           H  
ATOM   4208  CA  ALA A 265      26.942  12.080 -15.742  1.00 96.90           C  
ATOM   4209  HA  ALA A 265      26.289  12.022 -14.871  1.00 96.90           H  
ATOM   4210  C   ALA A 265      27.073  10.652 -16.304  1.00 96.90           C  
ATOM   4211  CB  ALA A 265      26.298  13.036 -16.753  1.00 96.90           C  
ATOM   4212  HB1 ALA A 265      26.895  13.080 -17.663  1.00 96.90           H  
ATOM   4213  HB2 ALA A 265      25.302  12.674 -17.008  1.00 96.90           H  
ATOM   4214  HB3 ALA A 265      26.216  14.035 -16.324  1.00 96.90           H  
ATOM   4215  O   ALA A 265      26.176   9.835 -16.101  1.00 96.90           O  
ATOM   4216  N   ASP A 266      28.205  10.323 -16.933  1.00 96.13           N  
ATOM   4217  H   ASP A 266      28.904  11.035 -17.087  1.00 96.13           H  
ATOM   4218  CA  ASP A 266      28.517   8.970 -17.405  1.00 96.13           C  
ATOM   4219  HA  ASP A 266      27.675   8.593 -17.985  1.00 96.13           H  
ATOM   4220  C   ASP A 266      28.752   8.018 -16.231  1.00 96.13           C  
ATOM   4221  CB  ASP A 266      29.750   9.015 -18.314  1.00 96.13           C  
ATOM   4222  HB2 ASP A 266      30.633   9.306 -17.744  1.00 96.13           H  
ATOM   4223  HB3 ASP A 266      29.926   8.019 -18.720  1.00 96.13           H  
ATOM   4224  O   ASP A 266      28.204   6.916 -16.200  1.00 96.13           O  
ATOM   4225  CG  ASP A 266      29.529   9.989 -19.463  1.00 96.13           C  
ATOM   4226  OD1 ASP A 266      28.808   9.584 -20.402  1.00 96.13           O  
ATOM   4227  OD2 ASP A 266      30.016  11.135 -19.363  1.00 96.13           O  
ATOM   4228  N   ALA A 267      29.481   8.487 -15.213  1.00 96.17           N  
ATOM   4229  H   ALA A 267      29.921   9.389 -15.323  1.00 96.17           H  
ATOM   4230  CA  ALA A 267      29.656   7.763 -13.958  1.00 96.17           C  
ATOM   4231  HA  ALA A 267      30.034   6.767 -14.187  1.00 96.17           H  
ATOM   4232  C   ALA A 267      28.332   7.585 -13.195  1.00 96.17           C  
ATOM   4233  CB  ALA A 267      30.701   8.496 -13.115  1.00 96.17           C  
ATOM   4234  HB1 ALA A 267      30.965   7.871 -12.262  1.00 96.17           H  
ATOM   4235  HB2 ALA A 267      31.599   8.682 -13.704  1.00 96.17           H  
ATOM   4236  HB3 ALA A 267      30.305   9.447 -12.758  1.00 96.17           H  
ATOM   4237  O   ALA A 267      28.087   6.517 -12.639  1.00 96.17           O  
ATOM   4238  N   LEU A 268      27.456   8.596 -13.207  1.00 97.12           N  
ATOM   4239  H   LEU A 268      27.753   9.465 -13.626  1.00 97.12           H  
ATOM   4240  CA  LEU A 268      26.130   8.553 -12.583  1.00 97.12           C  
ATOM   4241  HA  LEU A 268      26.249   8.201 -11.558  1.00 97.12           H  
ATOM   4242  C   LEU A 268      25.184   7.571 -13.295  1.00 97.12           C  
ATOM   4243  CB  LEU A 268      25.561   9.985 -12.571  1.00 97.12           C  
ATOM   4244  HB2 LEU A 268      25.289  10.251 -13.593  1.00 97.12           H  
ATOM   4245  HB3 LEU A 268      26.334  10.678 -12.239  1.00 97.12           H  
ATOM   4246  O   LEU A 268      24.429   6.854 -12.638  1.00 97.12           O  
ATOM   4247  CG  LEU A 268      24.340  10.173 -11.659  1.00 97.12           C  
ATOM   4248  HG  LEU A 268      23.636   9.353 -11.796  1.00 97.12           H  
ATOM   4249  CD1 LEU A 268      24.756  10.248 -10.190  1.00 97.12           C  
ATOM   4250 HD11 LEU A 268      25.316   9.353  -9.919  1.00 97.12           H  
ATOM   4251 HD12 LEU A 268      25.397  11.115 -10.025  1.00 97.12           H  
ATOM   4252 HD13 LEU A 268      23.871  10.321  -9.557  1.00 97.12           H  
ATOM   4253  CD2 LEU A 268      23.627  11.483 -12.003  1.00 97.12           C  
ATOM   4254 HD21 LEU A 268      24.314  12.321 -11.884  1.00 97.12           H  
ATOM   4255 HD22 LEU A 268      22.767  11.618 -11.346  1.00 97.12           H  
ATOM   4256 HD23 LEU A 268      23.281  11.446 -13.036  1.00 97.12           H  
ATOM   4257  N   TRP A 269      25.243   7.507 -14.629  1.00 97.11           N  
ATOM   4258  H   TRP A 269      25.850   8.156 -15.109  1.00 97.11           H  
ATOM   4259  CA  TRP A 269      24.530   6.515 -15.437  1.00 97.11           C  
ATOM   4260  HA  TRP A 269      23.473   6.523 -15.168  1.00 97.11           H  
ATOM   4261  C   TRP A 269      25.045   5.099 -15.166  1.00 97.11           C  
ATOM   4262  CB  TRP A 269      24.652   6.881 -16.921  1.00 97.11           C  
ATOM   4263  HB2 TRP A 269      24.053   7.772 -17.114  1.00 97.11           H  
ATOM   4264  HB3 TRP A 269      25.689   7.135 -17.140  1.00 97.11           H  
ATOM   4265  O   TRP A 269      24.254   4.226 -14.808  1.00 97.11           O  
ATOM   4266  CG  TRP A 269      24.232   5.803 -17.872  1.00 97.11           C  
ATOM   4267  CD1 TRP A 269      25.081   4.974 -18.520  1.00 97.11           C  
ATOM   4268  HD1 TRP A 269      26.158   4.989 -18.436  1.00 97.11           H  
ATOM   4269  CD2 TRP A 269      22.888   5.385 -18.274  1.00 97.11           C  
ATOM   4270  CE2 TRP A 269      23.010   4.304 -19.200  1.00 97.11           C  
ATOM   4271  CE3 TRP A 269      21.579   5.808 -17.954  1.00 97.11           C  
ATOM   4272  HE3 TRP A 269      21.453   6.622 -17.255  1.00 97.11           H  
ATOM   4273  NE1 TRP A 269      24.367   4.098 -19.307  1.00 97.11           N  
ATOM   4274  HE1 TRP A 269      24.815   3.419 -19.905  1.00 97.11           H  
ATOM   4275  CH2 TRP A 269      20.609   4.146 -19.463  1.00 97.11           C  
ATOM   4276  HH2 TRP A 269      19.744   3.690 -19.921  1.00 97.11           H  
ATOM   4277  CZ2 TRP A 269      21.897   3.691 -19.793  1.00 97.11           C  
ATOM   4278  HZ2 TRP A 269      22.047   2.885 -20.497  1.00 97.11           H  
ATOM   4279  CZ3 TRP A 269      20.452   5.197 -18.540  1.00 97.11           C  
ATOM   4280  HZ3 TRP A 269      19.460   5.544 -18.287  1.00 97.11           H  
ATOM   4281  N   TRP A 270      26.363   4.884 -15.238  1.00 96.70           N  
ATOM   4282  H   TRP A 270      26.961   5.641 -15.537  1.00 96.70           H  
ATOM   4283  CA  TRP A 270      26.989   3.605 -14.896  1.00 96.70           C  
ATOM   4284  HA  TRP A 270      26.631   2.835 -15.579  1.00 96.70           H  
ATOM   4285  C   TRP A 270      26.623   3.156 -13.471  1.00 96.70           C  
ATOM   4286  CB  TRP A 270      28.512   3.724 -15.053  1.00 96.70           C  
ATOM   4287  HB2 TRP A 270      28.844   4.651 -14.584  1.00 96.70           H  
ATOM   4288  HB3 TRP A 270      28.767   3.770 -16.112  1.00 96.70           H  
ATOM   4289  O   TRP A 270      26.232   2.005 -13.262  1.00 96.70           O  
ATOM   4290  CG  TRP A 270      29.243   2.590 -14.409  1.00 96.70           C  
ATOM   4291  CD1 TRP A 270      29.340   1.344 -14.919  1.00 96.70           C  
ATOM   4292  HD1 TRP A 270      28.957   1.043 -15.883  1.00 96.70           H  
ATOM   4293  CD2 TRP A 270      29.765   2.511 -13.046  1.00 96.70           C  
ATOM   4294  CE2 TRP A 270      30.078   1.147 -12.772  1.00 96.70           C  
ATOM   4295  CE3 TRP A 270      29.905   3.431 -11.983  1.00 96.70           C  
ATOM   4296  HE3 TRP A 270      29.676   4.472 -12.153  1.00 96.70           H  
ATOM   4297  NE1 TRP A 270      29.862   0.494 -13.966  1.00 96.70           N  
ATOM   4298  HE1 TRP A 270      29.877  -0.509 -14.084  1.00 96.70           H  
ATOM   4299  CH2 TRP A 270      30.554   1.642 -10.452  1.00 96.70           C  
ATOM   4300  HH2 TRP A 270      30.828   1.319  -9.459  1.00 96.70           H  
ATOM   4301  CZ2 TRP A 270      30.448   0.707 -11.496  1.00 96.70           C  
ATOM   4302  HZ2 TRP A 270      30.618  -0.346 -11.321  1.00 96.70           H  
ATOM   4303  CZ3 TRP A 270      30.302   3.003 -10.701  1.00 96.70           C  
ATOM   4304  HZ3 TRP A 270      30.397   3.723  -9.902  1.00 96.70           H  
ATOM   4305  N   GLY A 271      26.683   4.070 -12.498  1.00 96.29           N  
ATOM   4306  H   GLY A 271      27.059   4.980 -12.724  1.00 96.29           H  
ATOM   4307  CA  GLY A 271      26.320   3.816 -11.107  1.00 96.29           C  
ATOM   4308  HA2 GLY A 271      26.939   3.010 -10.712  1.00 96.29           H  
ATOM   4309  HA3 GLY A 271      26.505   4.720 -10.527  1.00 96.29           H  
ATOM   4310  C   GLY A 271      24.847   3.433 -10.954  1.00 96.29           C  
ATOM   4311  O   GLY A 271      24.532   2.484 -10.240  1.00 96.29           O  
ATOM   4312  N   LEU A 272      23.938   4.095 -11.676  1.00 96.78           N  
ATOM   4313  H   LEU A 272      24.247   4.869 -12.246  1.00 96.78           H  
ATOM   4314  CA  LEU A 272      22.520   3.734 -11.695  1.00 96.78           C  
ATOM   4315  HA  LEU A 272      22.177   3.682 -10.662  1.00 96.78           H  
ATOM   4316  C   LEU A 272      22.287   2.344 -12.305  1.00 96.78           C  
ATOM   4317  CB  LEU A 272      21.733   4.837 -12.429  1.00 96.78           C  
ATOM   4318  HB2 LEU A 272      21.926   5.791 -11.939  1.00 96.78           H  
ATOM   4319  HB3 LEU A 272      22.108   4.910 -13.450  1.00 96.78           H  
ATOM   4320  O   LEU A 272      21.618   1.520 -11.683  1.00 96.78           O  
ATOM   4321  CG  LEU A 272      20.212   4.604 -12.486  1.00 96.78           C  
ATOM   4322  HG  LEU A 272      20.004   3.646 -12.964  1.00 96.78           H  
ATOM   4323  CD1 LEU A 272      19.563   4.618 -11.099  1.00 96.78           C  
ATOM   4324 HD11 LEU A 272      19.775   5.562 -10.597  1.00 96.78           H  
ATOM   4325 HD12 LEU A 272      19.950   3.796 -10.499  1.00 96.78           H  
ATOM   4326 HD13 LEU A 272      18.485   4.491 -11.198  1.00 96.78           H  
ATOM   4327  CD2 LEU A 272      19.559   5.703 -13.325  1.00 96.78           C  
ATOM   4328 HD21 LEU A 272      18.485   5.528 -13.393  1.00 96.78           H  
ATOM   4329 HD22 LEU A 272      19.979   5.686 -14.331  1.00 96.78           H  
ATOM   4330 HD23 LEU A 272      19.747   6.679 -12.877  1.00 96.78           H  
ATOM   4331  N   ILE A 273      22.850   2.059 -13.481  1.00 96.62           N  
ATOM   4332  H   ILE A 273      23.401   2.780 -13.926  1.00 96.62           H  
ATOM   4333  CA  ILE A 273      22.703   0.771 -14.184  1.00 96.62           C  
ATOM   4334  HA  ILE A 273      21.643   0.529 -14.252  1.00 96.62           H  
ATOM   4335  C   ILE A 273      23.334  -0.387 -13.395  1.00 96.62           C  
ATOM   4336  CB  ILE A 273      23.272   0.916 -15.621  1.00 96.62           C  
ATOM   4337  HB  ILE A 273      24.273   1.339 -15.542  1.00 96.62           H  
ATOM   4338  O   ILE A 273      22.798  -1.498 -13.397  1.00 96.62           O  
ATOM   4339  CG1 ILE A 273      22.428   1.885 -16.486  1.00 96.62           C  
ATOM   4340 HG12 ILE A 273      22.515   2.896 -16.086  1.00 96.62           H  
ATOM   4341 HG13 ILE A 273      22.849   1.909 -17.491  1.00 96.62           H  
ATOM   4342  CG2 ILE A 273      23.424  -0.425 -16.361  1.00 96.62           C  
ATOM   4343 HG21 ILE A 273      22.469  -0.948 -16.416  1.00 96.62           H  
ATOM   4344 HG22 ILE A 273      24.161  -1.050 -15.856  1.00 96.62           H  
ATOM   4345 HG23 ILE A 273      23.791  -0.241 -17.371  1.00 96.62           H  
ATOM   4346  CD1 ILE A 273      20.930   1.560 -16.596  1.00 96.62           C  
ATOM   4347 HD11 ILE A 273      20.439   1.694 -15.632  1.00 96.62           H  
ATOM   4348 HD12 ILE A 273      20.785   0.537 -16.941  1.00 96.62           H  
ATOM   4349 HD13 ILE A 273      20.469   2.242 -17.309  1.00 96.62           H  
ATOM   4350  N   THR A 274      24.414  -0.128 -12.656  1.00 96.01           N  
ATOM   4351  H   THR A 274      24.840   0.783 -12.749  1.00 96.01           H  
ATOM   4352  CA  THR A 274      25.078  -1.117 -11.794  1.00 96.01           C  
ATOM   4353  HA  THR A 274      25.117  -2.068 -12.325  1.00 96.01           H  
ATOM   4354  C   THR A 274      24.302  -1.355 -10.498  1.00 96.01           C  
ATOM   4355  CB  THR A 274      26.529  -0.702 -11.508  1.00 96.01           C  
ATOM   4356  HB  THR A 274      26.547   0.242 -10.962  1.00 96.01           H  
ATOM   4357  O   THR A 274      23.960  -2.497 -10.192  1.00 96.01           O  
ATOM   4358  CG2 THR A 274      27.301  -1.755 -10.718  1.00 96.01           C  
ATOM   4359 HG21 THR A 274      27.270  -2.712 -11.239  1.00 96.01           H  
ATOM   4360 HG22 THR A 274      26.874  -1.869  -9.722  1.00 96.01           H  
ATOM   4361 HG23 THR A 274      28.339  -1.440 -10.612  1.00 96.01           H  
ATOM   4362  OG1 THR A 274      27.208  -0.545 -12.729  1.00 96.01           O  
ATOM   4363  HG1 THR A 274      27.037   0.349 -13.034  1.00 96.01           H  
ATOM   4364  N   LEU A 275      23.944  -0.303  -9.749  1.00 95.05           N  
ATOM   4365  H   LEU A 275      24.204   0.625 -10.051  1.00 95.05           H  
ATOM   4366  CA  LEU A 275      23.271  -0.449  -8.449  1.00 95.05           C  
ATOM   4367  HA  LEU A 275      23.762  -1.260  -7.911  1.00 95.05           H  
ATOM   4368  C   LEU A 275      21.798  -0.875  -8.553  1.00 95.05           C  
ATOM   4369  CB  LEU A 275      23.424   0.831  -7.611  1.00 95.05           C  
ATOM   4370  HB2 LEU A 275      22.876   0.677  -6.681  1.00 95.05           H  
ATOM   4371  HB3 LEU A 275      22.954   1.660  -8.139  1.00 95.05           H  
ATOM   4372  O   LEU A 275      21.247  -1.396  -7.586  1.00 95.05           O  
ATOM   4373  CG  LEU A 275      24.870   1.222  -7.247  1.00 95.05           C  
ATOM   4374  HG  LEU A 275      25.410   1.548  -8.136  1.00 95.05           H  
ATOM   4375  CD1 LEU A 275      24.833   2.386  -6.258  1.00 95.05           C  
ATOM   4376 HD11 LEU A 275      24.305   2.101  -5.348  1.00 95.05           H  
ATOM   4377 HD12 LEU A 275      25.850   2.691  -6.009  1.00 95.05           H  
ATOM   4378 HD13 LEU A 275      24.317   3.223  -6.729  1.00 95.05           H  
ATOM   4379  CD2 LEU A 275      25.662   0.073  -6.631  1.00 95.05           C  
ATOM   4380 HD21 LEU A 275      25.891  -0.658  -7.406  1.00 95.05           H  
ATOM   4381 HD22 LEU A 275      26.604   0.447  -6.230  1.00 95.05           H  
ATOM   4382 HD23 LEU A 275      25.088  -0.408  -5.839  1.00 95.05           H  
ATOM   4383  N   THR A 276      21.170  -0.722  -9.722  1.00 94.73           N  
ATOM   4384  H   THR A 276      21.654  -0.229 -10.458  1.00 94.73           H  
ATOM   4385  CA  THR A 276      19.860  -1.330 -10.029  1.00 94.73           C  
ATOM   4386  HA  THR A 276      19.310  -1.445  -9.095  1.00 94.73           H  
ATOM   4387  C   THR A 276      19.965  -2.744 -10.612  1.00 94.73           C  
ATOM   4388  CB  THR A 276      18.998  -0.442 -10.938  1.00 94.73           C  
ATOM   4389  HB  THR A 276      18.070  -0.965 -11.166  1.00 94.73           H  
ATOM   4390  O   THR A 276      18.940  -3.355 -10.909  1.00 94.73           O  
ATOM   4391  CG2 THR A 276      18.633   0.884 -10.270  1.00 94.73           C  
ATOM   4392 HG21 THR A 276      18.052   0.686  -9.369  1.00 94.73           H  
ATOM   4393 HG22 THR A 276      18.037   1.484 -10.957  1.00 94.73           H  
ATOM   4394 HG23 THR A 276      19.533   1.434  -9.996  1.00 94.73           H  
ATOM   4395  OG1 THR A 276      19.650  -0.162 -12.149  1.00 94.73           O  
ATOM   4396  HG1 THR A 276      20.347   0.472 -11.966  1.00 94.73           H  
ATOM   4397  N   THR A 277      21.175  -3.303 -10.741  1.00 96.13           N  
ATOM   4398  H   THR A 277      21.977  -2.772 -10.433  1.00 96.13           H  
ATOM   4399  CA  THR A 277      21.461  -4.635 -11.318  1.00 96.13           C  
ATOM   4400  HA  THR A 277      22.546  -4.685 -11.406  1.00 96.13           H  
ATOM   4401  C   THR A 277      20.977  -4.834 -12.762  1.00 96.13           C  
ATOM   4402  CB  THR A 277      21.073  -5.796 -10.376  1.00 96.13           C  
ATOM   4403  HB  THR A 277      21.304  -6.746 -10.858  1.00 96.13           H  
ATOM   4404  O   THR A 277      20.714  -5.955 -13.185  1.00 96.13           O  
ATOM   4405  CG2 THR A 277      21.859  -5.728  -9.069  1.00 96.13           C  
ATOM   4406 HG21 THR A 277      21.552  -4.850  -8.499  1.00 96.13           H  
ATOM   4407 HG22 THR A 277      21.658  -6.625  -8.483  1.00 96.13           H  
ATOM   4408 HG23 THR A 277      22.927  -5.670  -9.278  1.00 96.13           H  
ATOM   4409  OG1 THR A 277      19.709  -5.783 -10.013  1.00 96.13           O  
ATOM   4410  HG1 THR A 277      19.336  -4.963 -10.346  1.00 96.13           H  
ATOM   4411  N   ILE A 278      20.889  -3.747 -13.536  1.00 96.54           N  
ATOM   4412  H   ILE A 278      21.159  -2.858 -13.139  1.00 96.54           H  
ATOM   4413  CA  ILE A 278      20.532  -3.775 -14.964  1.00 96.54           C  
ATOM   4414  HA  ILE A 278      19.796  -4.563 -15.125  1.00 96.54           H  
ATOM   4415  C   ILE A 278      21.750  -4.146 -15.827  1.00 96.54           C  
ATOM   4416  CB  ILE A 278      19.877  -2.432 -15.365  1.00 96.54           C  
ATOM   4417  HB  ILE A 278      20.543  -1.618 -15.076  1.00 96.54           H  
ATOM   4418  O   ILE A 278      21.610  -4.899 -16.785  1.00 96.54           O  
ATOM   4419  CG1 ILE A 278      18.535  -2.258 -14.614  1.00 96.54           C  
ATOM   4420 HG12 ILE A 278      17.857  -3.064 -14.894  1.00 96.54           H  
ATOM   4421 HG13 ILE A 278      18.711  -2.334 -13.541  1.00 96.54           H  
ATOM   4422  CG2 ILE A 278      19.655  -2.354 -16.883  1.00 96.54           C  
ATOM   4423 HG21 ILE A 278      19.195  -1.404 -17.157  1.00 96.54           H  
ATOM   4424 HG22 ILE A 278      20.606  -2.410 -17.413  1.00 96.54           H  
ATOM   4425 HG23 ILE A 278      19.019  -3.175 -17.214  1.00 96.54           H  
ATOM   4426  CD1 ILE A 278      17.833  -0.915 -14.862  1.00 96.54           C  
ATOM   4427 HD11 ILE A 278      18.535  -0.095 -14.710  1.00 96.54           H  
ATOM   4428 HD12 ILE A 278      17.434  -0.873 -15.875  1.00 96.54           H  
ATOM   4429 HD13 ILE A 278      17.006  -0.809 -14.160  1.00 96.54           H  
ATOM   4430  N   GLY A 279      22.947  -3.668 -15.464  1.00 94.64           N  
ATOM   4431  H   GLY A 279      22.964  -3.023 -14.686  1.00 94.64           H  
ATOM   4432  CA  GLY A 279      24.228  -4.247 -15.892  1.00 94.64           C  
ATOM   4433  HA2 GLY A 279      25.034  -3.652 -15.463  1.00 94.64           H  
ATOM   4434  HA3 GLY A 279      24.303  -5.255 -15.484  1.00 94.64           H  
ATOM   4435  C   GLY A 279      24.488  -4.346 -17.403  1.00 94.64           C  
ATOM   4436  O   GLY A 279      25.119  -5.310 -17.821  1.00 94.64           O  
ATOM   4437  N   TYR A 280      24.032  -3.384 -18.219  1.00 96.11           N  
ATOM   4438  H   TYR A 280      23.489  -2.634 -17.816  1.00 96.11           H  
ATOM   4439  CA  TYR A 280      24.125  -3.446 -19.691  1.00 96.11           C  
ATOM   4440  HA  TYR A 280      23.509  -4.272 -20.046  1.00 96.11           H  
ATOM   4441  C   TYR A 280      25.540  -3.677 -20.259  1.00 96.11           C  
ATOM   4442  CB  TYR A 280      23.612  -2.130 -20.299  1.00 96.11           C  
ATOM   4443  HB2 TYR A 280      23.788  -2.157 -21.374  1.00 96.11           H  
ATOM   4444  HB3 TYR A 280      24.225  -1.323 -19.897  1.00 96.11           H  
ATOM   4445  O   TYR A 280      25.663  -4.204 -21.362  1.00 96.11           O  
ATOM   4446  CG  TYR A 280      22.151  -1.768 -20.106  1.00 96.11           C  
ATOM   4447  CD1 TYR A 280      21.132  -2.715 -20.334  1.00 96.11           C  
ATOM   4448  HD1 TYR A 280      21.387  -3.735 -20.584  1.00 96.11           H  
ATOM   4449  CD2 TYR A 280      21.814  -0.434 -19.806  1.00 96.11           C  
ATOM   4450  HD2 TYR A 280      22.598   0.296 -19.664  1.00 96.11           H  
ATOM   4451  CE1 TYR A 280      19.780  -2.329 -20.258  1.00 96.11           C  
ATOM   4452  HE1 TYR A 280      18.994  -3.049 -20.429  1.00 96.11           H  
ATOM   4453  CE2 TYR A 280      20.465  -0.042 -19.731  1.00 96.11           C  
ATOM   4454  HE2 TYR A 280      20.220   0.986 -19.510  1.00 96.11           H  
ATOM   4455  OH  TYR A 280      18.142  -0.614 -19.883  1.00 96.11           O  
ATOM   4456  HH  TYR A 280      18.073   0.321 -19.677  1.00 96.11           H  
ATOM   4457  CZ  TYR A 280      19.445  -0.991 -19.959  1.00 96.11           C  
ATOM   4458  N   GLY A 281      26.593  -3.258 -19.548  1.00 94.25           N  
ATOM   4459  H   GLY A 281      26.418  -2.830 -18.650  1.00 94.25           H  
ATOM   4460  CA  GLY A 281      27.981  -3.346 -20.019  1.00 94.25           C  
ATOM   4461  HA2 GLY A 281      28.150  -4.328 -20.461  1.00 94.25           H  
ATOM   4462  HA3 GLY A 281      28.652  -3.232 -19.167  1.00 94.25           H  
ATOM   4463  C   GLY A 281      28.370  -2.289 -21.061  1.00 94.25           C  
ATOM   4464  O   GLY A 281      29.452  -2.376 -21.630  1.00 94.25           O  
ATOM   4465  N   ASP A 282      27.521  -1.283 -21.293  1.00 95.66           N  
ATOM   4466  H   ASP A 282      26.682  -1.221 -20.734  1.00 95.66           H  
ATOM   4467  CA  ASP A 282      27.774  -0.155 -22.199  1.00 95.66           C  
ATOM   4468  HA  ASP A 282      28.066  -0.547 -23.173  1.00 95.66           H  
ATOM   4469  C   ASP A 282      28.911   0.759 -21.714  1.00 95.66           C  
ATOM   4470  CB  ASP A 282      26.468   0.644 -22.361  1.00 95.66           C  
ATOM   4471  HB2 ASP A 282      25.683  -0.025 -22.713  1.00 95.66           H  
ATOM   4472  HB3 ASP A 282      26.621   1.404 -23.127  1.00 95.66           H  
ATOM   4473  O   ASP A 282      29.617   1.357 -22.523  1.00 95.66           O  
ATOM   4474  CG  ASP A 282      26.002   1.320 -21.063  1.00 95.66           C  
ATOM   4475  OD1 ASP A 282      25.809   0.601 -20.056  1.00 95.66           O  
ATOM   4476  OD2 ASP A 282      25.817   2.557 -21.072  1.00 95.66           O  
ATOM   4477  N   LYS A 283      29.096   0.836 -20.390  1.00 94.40           N  
ATOM   4478  H   LYS A 283      28.421   0.349 -19.818  1.00 94.40           H  
ATOM   4479  CA  LYS A 283      30.224   1.472 -19.701  1.00 94.40           C  
ATOM   4480  HA  LYS A 283      31.059   1.549 -20.398  1.00 94.40           H  
ATOM   4481  C   LYS A 283      30.672   0.586 -18.542  1.00 94.40           C  
ATOM   4482  CB  LYS A 283      29.827   2.886 -19.232  1.00 94.40           C  
ATOM   4483  HB2 LYS A 283      30.567   3.259 -18.523  1.00 94.40           H  
ATOM   4484  HB3 LYS A 283      28.854   2.854 -18.741  1.00 94.40           H  
ATOM   4485  O   LYS A 283      29.842  -0.007 -17.852  1.00 94.40           O  
ATOM   4486  CG  LYS A 283      29.778   3.837 -20.436  1.00 94.40           C  
ATOM   4487  HG2 LYS A 283      30.777   3.889 -20.870  1.00 94.40           H  
ATOM   4488  HG3 LYS A 283      29.099   3.437 -21.188  1.00 94.40           H  
ATOM   4489  CD  LYS A 283      29.286   5.249 -20.119  1.00 94.40           C  
ATOM   4490  HD2 LYS A 283      28.211   5.216 -19.944  1.00 94.40           H  
ATOM   4491  HD3 LYS A 283      29.792   5.648 -19.240  1.00 94.40           H  
ATOM   4492  CE  LYS A 283      29.621   6.091 -21.357  1.00 94.40           C  
ATOM   4493  HE2 LYS A 283      29.579   5.441 -22.231  1.00 94.40           H  
ATOM   4494  HE3 LYS A 283      30.645   6.452 -21.261  1.00 94.40           H  
ATOM   4495  NZ  LYS A 283      28.691   7.222 -21.556  1.00 94.40           N  
ATOM   4496  HZ1 LYS A 283      28.789   7.919 -20.831  1.00 94.40           H  
ATOM   4497  HZ2 LYS A 283      27.728   6.921 -21.580  1.00 94.40           H  
ATOM   4498  HZ3 LYS A 283      28.919   7.738 -22.394  1.00 94.40           H  
ATOM   4499  N   TYR A 284      31.980   0.495 -18.319  1.00 94.72           N  
ATOM   4500  H   TYR A 284      32.612   0.979 -18.941  1.00 94.72           H  
ATOM   4501  CA  TYR A 284      32.576  -0.327 -17.264  1.00 94.72           C  
ATOM   4502  HA  TYR A 284      31.897  -0.322 -16.411  1.00 94.72           H  
ATOM   4503  C   TYR A 284      33.934   0.235 -16.810  1.00 94.72           C  
ATOM   4504  CB  TYR A 284      32.725  -1.781 -17.752  1.00 94.72           C  
ATOM   4505  HB2 TYR A 284      33.217  -2.367 -16.977  1.00 94.72           H  
ATOM   4506  HB3 TYR A 284      31.728  -2.202 -17.880  1.00 94.72           H  
ATOM   4507  O   TYR A 284      34.656   0.808 -17.630  1.00 94.72           O  
ATOM   4508  CG  TYR A 284      33.492  -1.956 -19.054  1.00 94.72           C  
ATOM   4509  CD1 TYR A 284      32.791  -2.058 -20.273  1.00 94.72           C  
ATOM   4510  HD1 TYR A 284      31.712  -2.016 -20.293  1.00 94.72           H  
ATOM   4511  CD2 TYR A 284      34.901  -2.003 -19.050  1.00 94.72           C  
ATOM   4512  HD2 TYR A 284      35.441  -1.907 -18.120  1.00 94.72           H  
ATOM   4513  CE1 TYR A 284      33.496  -2.193 -21.484  1.00 94.72           C  
ATOM   4514  HE1 TYR A 284      32.965  -2.243 -22.423  1.00 94.72           H  
ATOM   4515  CE2 TYR A 284      35.607  -2.134 -20.263  1.00 94.72           C  
ATOM   4516  HE2 TYR A 284      36.686  -2.160 -20.279  1.00 94.72           H  
ATOM   4517  OH  TYR A 284      35.591  -2.329 -22.651  1.00 94.72           O  
ATOM   4518  HH  TYR A 284      36.523  -2.130 -22.533  1.00 94.72           H  
ATOM   4519  CZ  TYR A 284      34.905  -2.217 -21.484  1.00 94.72           C  
ATOM   4520  N   PRO A 285      34.311   0.071 -15.527  1.00 95.00           N  
ATOM   4521  CA  PRO A 285      35.618   0.483 -15.023  1.00 95.00           C  
ATOM   4522  HA  PRO A 285      35.800   1.527 -15.275  1.00 95.00           H  
ATOM   4523  C   PRO A 285      36.753  -0.358 -15.627  1.00 95.00           C  
ATOM   4524  CB  PRO A 285      35.526   0.366 -13.500  1.00 95.00           C  
ATOM   4525  HB2 PRO A 285      36.484   0.116 -13.045  1.00 95.00           H  
ATOM   4526  HB3 PRO A 285      35.148   1.302 -13.087  1.00 95.00           H  
ATOM   4527  O   PRO A 285      36.620  -1.576 -15.817  1.00 95.00           O  
ATOM   4528  CG  PRO A 285      34.491  -0.737 -13.296  1.00 95.00           C  
ATOM   4529  HG2 PRO A 285      34.962  -1.713 -13.406  1.00 95.00           H  
ATOM   4530  HG3 PRO A 285      33.995  -0.653 -12.329  1.00 95.00           H  
ATOM   4531  CD  PRO A 285      33.519  -0.506 -14.449  1.00 95.00           C  
ATOM   4532  HD2 PRO A 285      33.060  -1.449 -14.743  1.00 95.00           H  
ATOM   4533  HD3 PRO A 285      32.755   0.209 -14.144  1.00 95.00           H  
ATOM   4534  N   GLN A 286      37.878   0.291 -15.920  1.00 94.71           N  
ATOM   4535  H   GLN A 286      37.922   1.269 -15.674  1.00 94.71           H  
ATOM   4536  CA  GLN A 286      39.064  -0.290 -16.542  1.00 94.71           C  
ATOM   4537  HA  GLN A 286      38.871  -1.350 -16.714  1.00 94.71           H  
ATOM   4538  C   GLN A 286      40.308  -0.257 -15.647  1.00 94.71           C  
ATOM   4539  CB  GLN A 286      39.310   0.324 -17.931  1.00 94.71           C  
ATOM   4540  HB2 GLN A 286      39.373   1.410 -17.865  1.00 94.71           H  
ATOM   4541  HB3 GLN A 286      40.261  -0.055 -18.307  1.00 94.71           H  
ATOM   4542  O   GLN A 286      41.108  -1.194 -15.725  1.00 94.71           O  
ATOM   4543  CG  GLN A 286      38.197  -0.094 -18.908  1.00 94.71           C  
ATOM   4544  HG2 GLN A 286      37.925  -1.130 -18.703  1.00 94.71           H  
ATOM   4545  HG3 GLN A 286      37.304   0.512 -18.756  1.00 94.71           H  
ATOM   4546  CD  GLN A 286      38.624  -0.024 -20.368  1.00 94.71           C  
ATOM   4547  NE2 GLN A 286      38.479   1.091 -21.046  1.00 94.71           N  
ATOM   4548 HE21 GLN A 286      38.023   1.901 -20.650  1.00 94.71           H  
ATOM   4549 HE22 GLN A 286      38.792   1.099 -22.006  1.00 94.71           H  
ATOM   4550  OE1 GLN A 286      39.076  -1.016 -20.921  1.00 94.71           O  
ATOM   4551  N   THR A 287      40.449   0.716 -14.744  1.00 95.84           N  
ATOM   4552  H   THR A 287      39.707   1.387 -14.609  1.00 95.84           H  
ATOM   4553  CA  THR A 287      41.606   0.771 -13.833  1.00 95.84           C  
ATOM   4554  HA  THR A 287      42.486   0.478 -14.406  1.00 95.84           H  
ATOM   4555  C   THR A 287      41.437  -0.232 -12.692  1.00 95.84           C  
ATOM   4556  CB  THR A 287      41.915   2.184 -13.297  1.00 95.84           C  
ATOM   4557  HB  THR A 287      42.986   2.239 -13.101  1.00 95.84           H  
ATOM   4558  O   THR A 287      40.323  -0.638 -12.350  1.00 95.84           O  
ATOM   4559  CG2 THR A 287      41.549   3.294 -14.272  1.00 95.84           C  
ATOM   4560 HG21 THR A 287      40.467   3.369 -14.383  1.00 95.84           H  
ATOM   4561 HG22 THR A 287      41.949   4.241 -13.909  1.00 95.84           H  
ATOM   4562 HG23 THR A 287      41.993   3.074 -15.242  1.00 95.84           H  
ATOM   4563  OG1 THR A 287      41.253   2.439 -12.080  1.00 95.84           O  
ATOM   4564  HG1 THR A 287      40.881   3.319 -12.183  1.00 95.84           H  
ATOM   4565  N   TRP A 288      42.534  -0.648 -12.054  1.00 95.27           N  
ATOM   4566  H   TRP A 288      43.435  -0.302 -12.351  1.00 95.27           H  
ATOM   4567  CA  TRP A 288      42.435  -1.486 -10.849  1.00 95.27           C  
ATOM   4568  HA  TRP A 288      41.874  -2.390 -11.086  1.00 95.27           H  
ATOM   4569  C   TRP A 288      41.674  -0.772  -9.719  1.00 95.27           C  
ATOM   4570  CB  TRP A 288      43.837  -1.896 -10.387  1.00 95.27           C  
ATOM   4571  HB2 TRP A 288      44.321  -2.462 -11.184  1.00 95.27           H  
ATOM   4572  HB3 TRP A 288      44.430  -1.000 -10.206  1.00 95.27           H  
ATOM   4573  O   TRP A 288      40.876  -1.387  -9.012  1.00 95.27           O  
ATOM   4574  CG  TRP A 288      43.837  -2.734  -9.146  1.00 95.27           C  
ATOM   4575  CD1 TRP A 288      44.124  -2.288  -7.902  1.00 95.27           C  
ATOM   4576  HD1 TRP A 288      44.407  -1.274  -7.662  1.00 95.27           H  
ATOM   4577  CD2 TRP A 288      43.463  -4.139  -8.992  1.00 95.27           C  
ATOM   4578  CE2 TRP A 288      43.549  -4.478  -7.609  1.00 95.27           C  
ATOM   4579  CE3 TRP A 288      43.047  -5.157  -9.879  1.00 95.27           C  
ATOM   4580  HE3 TRP A 288      42.976  -4.936 -10.934  1.00 95.27           H  
ATOM   4581  NE1 TRP A 288      43.968  -3.317  -6.994  1.00 95.27           N  
ATOM   4582  HE1 TRP A 288      44.132  -3.206  -6.004  1.00 95.27           H  
ATOM   4583  CH2 TRP A 288      42.831  -6.751  -8.037  1.00 95.27           C  
ATOM   4584  HH2 TRP A 288      42.594  -7.744  -7.686  1.00 95.27           H  
ATOM   4585  CZ2 TRP A 288      43.241  -5.760  -7.128  1.00 95.27           C  
ATOM   4586  HZ2 TRP A 288      43.321  -5.980  -6.074  1.00 95.27           H  
ATOM   4587  CZ3 TRP A 288      42.735  -6.448  -9.408  1.00 95.27           C  
ATOM   4588  HZ3 TRP A 288      42.425  -7.214 -10.104  1.00 95.27           H  
ATOM   4589  N   ASN A 289      41.875   0.541  -9.590  1.00 94.47           N  
ATOM   4590  H   ASN A 289      42.445   1.003 -10.283  1.00 94.47           H  
ATOM   4591  CA  ASN A 289      41.308   1.356  -8.520  1.00 94.47           C  
ATOM   4592  HA  ASN A 289      41.458   0.844  -7.570  1.00 94.47           H  
ATOM   4593  C   ASN A 289      39.796   1.545  -8.703  1.00 94.47           C  
ATOM   4594  CB  ASN A 289      42.070   2.693  -8.482  1.00 94.47           C  
ATOM   4595  HB2 ASN A 289      41.929   3.218  -9.426  1.00 94.47           H  
ATOM   4596  HB3 ASN A 289      41.671   3.318  -7.683  1.00 94.47           H  
ATOM   4597  O   ASN A 289      39.026   1.289  -7.775  1.00 94.47           O  
ATOM   4598  CG  ASN A 289      43.556   2.501  -8.231  1.00 94.47           C  
ATOM   4599  ND2 ASN A 289      44.400   3.223  -8.930  1.00 94.47           N  
ATOM   4600 HD21 ASN A 289      45.385   3.068  -8.770  1.00 94.47           H  
ATOM   4601 HD22 ASN A 289      44.078   3.868  -9.638  1.00 94.47           H  
ATOM   4602  OD1 ASN A 289      43.974   1.682  -7.429  1.00 94.47           O  
ATOM   4603  N   GLY A 290      39.358   1.917  -9.908  1.00 95.57           N  
ATOM   4604  H   GLY A 290      40.029   2.083 -10.644  1.00 95.57           H  
ATOM   4605  CA  GLY A 290      37.945   2.058 -10.248  1.00 95.57           C  
ATOM   4606  HA2 GLY A 290      37.469   2.746  -9.549  1.00 95.57           H  
ATOM   4607  HA3 GLY A 290      37.859   2.477 -11.250  1.00 95.57           H  
ATOM   4608  C   GLY A 290      37.205   0.722 -10.205  1.00 95.57           C  
ATOM   4609  O   GLY A 290      36.092   0.667  -9.685  1.00 95.57           O  
ATOM   4610  N   ARG A 291      37.839  -0.387 -10.618  1.00 95.98           N  
ATOM   4611  H   ARG A 291      38.727  -0.268 -11.083  1.00 95.98           H  
ATOM   4612  CA  ARG A 291      37.288  -1.751 -10.472  1.00 95.98           C  
ATOM   4613  HA  ARG A 291      36.284  -1.764 -10.895  1.00 95.98           H  
ATOM   4614  C   ARG A 291      37.119  -2.168  -9.005  1.00 95.98           C  
ATOM   4615  CB  ARG A 291      38.163  -2.753 -11.249  1.00 95.98           C  
ATOM   4616  HB2 ARG A 291      37.896  -3.768 -10.954  1.00 95.98           H  
ATOM   4617  HB3 ARG A 291      39.212  -2.592 -11.001  1.00 95.98           H  
ATOM   4618  O   ARG A 291      36.061  -2.685  -8.644  1.00 95.98           O  
ATOM   4619  CG  ARG A 291      37.946  -2.619 -12.765  1.00 95.98           C  
ATOM   4620  HG2 ARG A 291      36.942  -2.974 -13.000  1.00 95.98           H  
ATOM   4621  HG3 ARG A 291      38.020  -1.574 -13.064  1.00 95.98           H  
ATOM   4622  CD  ARG A 291      38.964  -3.418 -13.586  1.00 95.98           C  
ATOM   4623  HD2 ARG A 291      39.943  -2.952 -13.479  1.00 95.98           H  
ATOM   4624  HD3 ARG A 291      39.011  -4.440 -13.208  1.00 95.98           H  
ATOM   4625  NE  ARG A 291      38.561  -3.441 -15.003  1.00 95.98           N  
ATOM   4626  HE  ARG A 291      37.666  -3.022 -15.213  1.00 95.98           H  
ATOM   4627  NH1 ARG A 291      40.543  -4.079 -15.970  1.00 95.98           N  
ATOM   4628 HH11 ARG A 291      41.009  -3.763 -15.132  1.00 95.98           H  
ATOM   4629 HH12 ARG A 291      41.089  -4.163 -16.816  1.00 95.98           H  
ATOM   4630  NH2 ARG A 291      38.721  -3.797 -17.232  1.00 95.98           N  
ATOM   4631 HH21 ARG A 291      37.767  -3.475 -17.317  1.00 95.98           H  
ATOM   4632 HH22 ARG A 291      39.271  -3.973 -18.060  1.00 95.98           H  
ATOM   4633  CZ  ARG A 291      39.278  -3.786 -16.054  1.00 95.98           C  
ATOM   4634  N   LEU A 292      38.111  -1.912  -8.150  1.00 97.01           N  
ATOM   4635  H   LEU A 292      38.965  -1.518  -8.519  1.00 97.01           H  
ATOM   4636  CA  LEU A 292      38.056  -2.217  -6.713  1.00 97.01           C  
ATOM   4637  HA  LEU A 292      37.783  -3.266  -6.598  1.00 97.01           H  
ATOM   4638  C   LEU A 292      36.988  -1.381  -5.984  1.00 97.01           C  
ATOM   4639  CB  LEU A 292      39.467  -2.007  -6.130  1.00 97.01           C  
ATOM   4640  HB2 LEU A 292      40.155  -2.674  -6.648  1.00 97.01           H  
ATOM   4641  HB3 LEU A 292      39.781  -0.984  -6.339  1.00 97.01           H  
ATOM   4642  O   LEU A 292      36.207  -1.916  -5.189  1.00 97.01           O  
ATOM   4643  CG  LEU A 292      39.598  -2.246  -4.614  1.00 97.01           C  
ATOM   4644  HG  LEU A 292      38.972  -1.533  -4.078  1.00 97.01           H  
ATOM   4645  CD1 LEU A 292      39.196  -3.664  -4.203  1.00 97.01           C  
ATOM   4646 HD11 LEU A 292      38.133  -3.821  -4.389  1.00 97.01           H  
ATOM   4647 HD12 LEU A 292      39.777  -4.395  -4.765  1.00 97.01           H  
ATOM   4648 HD13 LEU A 292      39.377  -3.801  -3.137  1.00 97.01           H  
ATOM   4649  CD2 LEU A 292      41.051  -2.023  -4.192  1.00 97.01           C  
ATOM   4650 HD21 LEU A 292      41.357  -1.010  -4.455  1.00 97.01           H  
ATOM   4651 HD22 LEU A 292      41.146  -2.147  -3.113  1.00 97.01           H  
ATOM   4652 HD23 LEU A 292      41.701  -2.735  -4.699  1.00 97.01           H  
ATOM   4653  N   LEU A 293      36.904  -0.084  -6.296  1.00 95.98           N  
ATOM   4654  H   LEU A 293      37.592   0.298  -6.928  1.00 95.98           H  
ATOM   4655  CA  LEU A 293      35.853   0.808  -5.799  1.00 95.98           C  
ATOM   4656  HA  LEU A 293      35.839   0.764  -4.710  1.00 95.98           H  
ATOM   4657  C   LEU A 293      34.470   0.354  -6.278  1.00 95.98           C  
ATOM   4658  CB  LEU A 293      36.155   2.250  -6.249  1.00 95.98           C  
ATOM   4659  HB2 LEU A 293      36.401   2.237  -7.310  1.00 95.98           H  
ATOM   4660  HB3 LEU A 293      35.260   2.861  -6.129  1.00 95.98           H  
ATOM   4661  O   LEU A 293      33.563   0.211  -5.461  1.00 95.98           O  
ATOM   4662  CG  LEU A 293      37.307   2.909  -5.467  1.00 95.98           C  
ATOM   4663  HG  LEU A 293      38.145   2.217  -5.379  1.00 95.98           H  
ATOM   4664  CD1 LEU A 293      37.783   4.156  -6.204  1.00 95.98           C  
ATOM   4665 HD11 LEU A 293      38.593   4.634  -5.654  1.00 95.98           H  
ATOM   4666 HD12 LEU A 293      38.159   3.870  -7.187  1.00 95.98           H  
ATOM   4667 HD13 LEU A 293      36.962   4.861  -6.331  1.00 95.98           H  
ATOM   4668  CD2 LEU A 293      36.866   3.332  -4.063  1.00 95.98           C  
ATOM   4669 HD21 LEU A 293      36.558   2.460  -3.485  1.00 95.98           H  
ATOM   4670 HD22 LEU A 293      37.703   3.806  -3.551  1.00 95.98           H  
ATOM   4671 HD23 LEU A 293      36.040   4.040  -4.130  1.00 95.98           H  
ATOM   4672  N   ALA A 294      34.313   0.058  -7.570  1.00 95.84           N  
ATOM   4673  H   ALA A 294      35.087   0.216  -8.200  1.00 95.84           H  
ATOM   4674  CA  ALA A 294      33.058  -0.406  -8.150  1.00 95.84           C  
ATOM   4675  HA  ALA A 294      32.301   0.362  -7.990  1.00 95.84           H  
ATOM   4676  C   ALA A 294      32.550  -1.696  -7.494  1.00 95.84           C  
ATOM   4677  CB  ALA A 294      33.248  -0.595  -9.656  1.00 95.84           C  
ATOM   4678  HB1 ALA A 294      33.446   0.367 -10.127  1.00 95.84           H  
ATOM   4679  HB2 ALA A 294      34.083  -1.269  -9.849  1.00 95.84           H  
ATOM   4680  HB3 ALA A 294      32.345  -1.028 -10.087  1.00 95.84           H  
ATOM   4681  O   ALA A 294      31.382  -1.754  -7.111  1.00 95.84           O  
ATOM   4682  N   ALA A 295      33.406  -2.704  -7.299  1.00 95.95           N  
ATOM   4683  H   ALA A 295      34.347  -2.617  -7.654  1.00 95.95           H  
ATOM   4684  CA  ALA A 295      33.027  -3.943  -6.618  1.00 95.95           C  
ATOM   4685  HA  ALA A 295      32.198  -4.402  -7.158  1.00 95.95           H  
ATOM   4686  C   ALA A 295      32.554  -3.680  -5.174  1.00 95.95           C  
ATOM   4687  CB  ALA A 295      34.224  -4.901  -6.664  1.00 95.95           C  
ATOM   4688  HB1 ALA A 295      33.962  -5.842  -6.179  1.00 95.95           H  
ATOM   4689  HB2 ALA A 295      35.080  -4.461  -6.152  1.00 95.95           H  
ATOM   4690  HB3 ALA A 295      34.497  -5.100  -7.700  1.00 95.95           H  
ATOM   4691  O   ALA A 295      31.486  -4.147  -4.768  1.00 95.95           O  
ATOM   4692  N   THR A 296      33.307  -2.860  -4.432  1.00 95.62           N  
ATOM   4693  H   THR A 296      34.158  -2.505  -4.845  1.00 95.62           H  
ATOM   4694  CA  THR A 296      33.003  -2.480  -3.043  1.00 95.62           C  
ATOM   4695  HA  THR A 296      32.932  -3.385  -2.438  1.00 95.62           H  
ATOM   4696  C   THR A 296      31.664  -1.744  -2.936  1.00 95.62           C  
ATOM   4697  CB  THR A 296      34.136  -1.608  -2.472  1.00 95.62           C  
ATOM   4698  HB  THR A 296      34.200  -0.674  -3.030  1.00 95.62           H  
ATOM   4699  O   THR A 296      30.796  -2.123  -2.148  1.00 95.62           O  
ATOM   4700  CG2 THR A 296      33.941  -1.287  -0.990  1.00 95.62           C  
ATOM   4701 HG21 THR A 296      33.870  -2.211  -0.417  1.00 95.62           H  
ATOM   4702 HG22 THR A 296      33.036  -0.697  -0.845  1.00 95.62           H  
ATOM   4703 HG23 THR A 296      34.793  -0.710  -0.632  1.00 95.62           H  
ATOM   4704  OG1 THR A 296      35.367  -2.284  -2.576  1.00 95.62           O  
ATOM   4705  HG1 THR A 296      35.704  -2.168  -3.467  1.00 95.62           H  
ATOM   4706  N   PHE A 297      31.453  -0.718  -3.764  1.00 95.08           N  
ATOM   4707  H   PHE A 297      32.188  -0.450  -4.403  1.00 95.08           H  
ATOM   4708  CA  PHE A 297      30.217   0.064  -3.763  1.00 95.08           C  
ATOM   4709  HA  PHE A 297      29.956   0.285  -2.728  1.00 95.08           H  
ATOM   4710  C   PHE A 297      29.016  -0.694  -4.340  1.00 95.08           C  
ATOM   4711  CB  PHE A 297      30.436   1.401  -4.481  1.00 95.08           C  
ATOM   4712  HB2 PHE A 297      29.468   1.752  -4.836  1.00 95.08           H  
ATOM   4713  HB3 PHE A 297      31.066   1.259  -5.360  1.00 95.08           H  
ATOM   4714  O   PHE A 297      27.895  -0.423  -3.918  1.00 95.08           O  
ATOM   4715  CG  PHE A 297      31.017   2.475  -3.579  1.00 95.08           C  
ATOM   4716  CD1 PHE A 297      30.178   3.126  -2.654  1.00 95.08           C  
ATOM   4717  HD1 PHE A 297      29.128   2.874  -2.618  1.00 95.08           H  
ATOM   4718  CD2 PHE A 297      32.380   2.817  -3.639  1.00 95.08           C  
ATOM   4719  HD2 PHE A 297      33.032   2.337  -4.354  1.00 95.08           H  
ATOM   4720  CE1 PHE A 297      30.698   4.101  -1.785  1.00 95.08           C  
ATOM   4721  HE1 PHE A 297      30.051   4.601  -1.079  1.00 95.08           H  
ATOM   4722  CE2 PHE A 297      32.904   3.784  -2.764  1.00 95.08           C  
ATOM   4723  HE2 PHE A 297      33.953   4.036  -2.807  1.00 95.08           H  
ATOM   4724  CZ  PHE A 297      32.065   4.421  -1.833  1.00 95.08           C  
ATOM   4725  HZ  PHE A 297      32.472   5.162  -1.160  1.00 95.08           H  
ATOM   4726  N   THR A 298      29.213  -1.669  -5.233  1.00 95.26           N  
ATOM   4727  H   THR A 298      30.149  -1.825  -5.579  1.00 95.26           H  
ATOM   4728  CA  THR A 298      28.115  -2.499  -5.762  1.00 95.26           C  
ATOM   4729  HA  THR A 298      27.335  -1.838  -6.141  1.00 95.26           H  
ATOM   4730  C   THR A 298      27.483  -3.344  -4.660  1.00 95.26           C  
ATOM   4731  CB  THR A 298      28.568  -3.377  -6.938  1.00 95.26           C  
ATOM   4732  HB  THR A 298      29.381  -4.032  -6.625  1.00 95.26           H  
ATOM   4733  O   THR A 298      26.265  -3.310  -4.491  1.00 95.26           O  
ATOM   4734  CG2 THR A 298      27.437  -4.218  -7.529  1.00 95.26           C  
ATOM   4735 HG21 THR A 298      26.608  -3.574  -7.823  1.00 95.26           H  
ATOM   4736 HG22 THR A 298      27.803  -4.746  -8.410  1.00 95.26           H  
ATOM   4737 HG23 THR A 298      27.090  -4.953  -6.804  1.00 95.26           H  
ATOM   4738  OG1 THR A 298      29.008  -2.549  -7.983  1.00 95.26           O  
ATOM   4739  HG1 THR A 298      29.866  -2.202  -7.728  1.00 95.26           H  
ATOM   4740  N   LEU A 299      28.298  -4.033  -3.854  1.00 94.44           N  
ATOM   4741  H   LEU A 299      29.292  -3.989  -4.030  1.00 94.44           H  
ATOM   4742  CA  LEU A 299      27.834  -4.858  -2.730  1.00 94.44           C  
ATOM   4743  HA  LEU A 299      27.194  -5.648  -3.121  1.00 94.44           H  
ATOM   4744  C   LEU A 299      26.994  -4.035  -1.733  1.00 94.44           C  
ATOM   4745  CB  LEU A 299      29.090  -5.500  -2.104  1.00 94.44           C  
ATOM   4746  HB2 LEU A 299      29.740  -4.721  -1.705  1.00 94.44           H  
ATOM   4747  HB3 LEU A 299      29.634  -5.981  -2.916  1.00 94.44           H  
ATOM   4748  O   LEU A 299      25.912  -4.456  -1.313  1.00 94.44           O  
ATOM   4749  CG  LEU A 299      28.842  -6.561  -1.013  1.00 94.44           C  
ATOM   4750  HG  LEU A 299      28.003  -7.194  -1.304  1.00 94.44           H  
ATOM   4751  CD1 LEU A 299      30.087  -7.442  -0.876  1.00 94.44           C  
ATOM   4752 HD11 LEU A 299      29.920  -8.208  -0.118  1.00 94.44           H  
ATOM   4753 HD12 LEU A 299      30.947  -6.835  -0.593  1.00 94.44           H  
ATOM   4754 HD13 LEU A 299      30.296  -7.937  -1.824  1.00 94.44           H  
ATOM   4755  CD2 LEU A 299      28.571  -5.961   0.371  1.00 94.44           C  
ATOM   4756 HD21 LEU A 299      28.526  -6.758   1.114  1.00 94.44           H  
ATOM   4757 HD22 LEU A 299      29.367  -5.267   0.642  1.00 94.44           H  
ATOM   4758 HD23 LEU A 299      27.613  -5.443   0.387  1.00 94.44           H  
ATOM   4759  N   ILE A 300      27.466  -2.831  -1.402  1.00 94.01           N  
ATOM   4760  H   ILE A 300      28.358  -2.557  -1.788  1.00 94.01           H  
ATOM   4761  CA  ILE A 300      26.784  -1.908  -0.487  1.00 94.01           C  
ATOM   4762  HA  ILE A 300      26.477  -2.463   0.400  1.00 94.01           H  
ATOM   4763  C   ILE A 300      25.506  -1.347  -1.133  1.00 94.01           C  
ATOM   4764  CB  ILE A 300      27.759  -0.789  -0.041  1.00 94.01           C  
ATOM   4765  HB  ILE A 300      28.108  -0.266  -0.932  1.00 94.01           H  
ATOM   4766  O   ILE A 300      24.421  -1.445  -0.560  1.00 94.01           O  
ATOM   4767  CG1 ILE A 300      28.988  -1.381   0.695  1.00 94.01           C  
ATOM   4768 HG12 ILE A 300      28.678  -1.778   1.661  1.00 94.01           H  
ATOM   4769 HG13 ILE A 300      29.404  -2.209   0.121  1.00 94.01           H  
ATOM   4770  CG2 ILE A 300      27.047   0.229   0.871  1.00 94.01           C  
ATOM   4771 HG21 ILE A 300      26.701  -0.266   1.778  1.00 94.01           H  
ATOM   4772 HG22 ILE A 300      26.196   0.679   0.359  1.00 94.01           H  
ATOM   4773 HG23 ILE A 300      27.727   1.037   1.140  1.00 94.01           H  
ATOM   4774  CD1 ILE A 300      30.129  -0.376   0.908  1.00 94.01           C  
ATOM   4775 HD11 ILE A 300      30.409   0.074  -0.045  1.00 94.01           H  
ATOM   4776 HD12 ILE A 300      30.994  -0.898   1.316  1.00 94.01           H  
ATOM   4777 HD13 ILE A 300      29.832   0.404   1.609  1.00 94.01           H  
ATOM   4778  N   GLY A 301      25.611  -0.768  -2.329  1.00 94.60           N  
ATOM   4779  H   GLY A 301      26.514  -0.755  -2.780  1.00 94.60           H  
ATOM   4780  CA  GLY A 301      24.536  -0.008  -2.965  1.00 94.60           C  
ATOM   4781  HA2 GLY A 301      24.952   0.523  -3.821  1.00 94.60           H  
ATOM   4782  HA3 GLY A 301      24.155   0.732  -2.260  1.00 94.60           H  
ATOM   4783  C   GLY A 301      23.366  -0.868  -3.439  1.00 94.60           C  
ATOM   4784  O   GLY A 301      22.216  -0.513  -3.174  1.00 94.60           O  
ATOM   4785  N   VAL A 302      23.628  -2.030  -4.050  1.00 96.03           N  
ATOM   4786  H   VAL A 302      24.591  -2.296  -4.200  1.00 96.03           H  
ATOM   4787  CA  VAL A 302      22.573  -2.970  -4.483  1.00 96.03           C  
ATOM   4788  HA  VAL A 302      21.914  -2.460  -5.186  1.00 96.03           H  
ATOM   4789  C   VAL A 302      21.715  -3.406  -3.293  1.00 96.03           C  
ATOM   4790  CB  VAL A 302      23.181  -4.193  -5.205  1.00 96.03           C  
ATOM   4791  HB  VAL A 302      23.956  -4.629  -4.576  1.00 96.03           H  
ATOM   4792  O   VAL A 302      20.494  -3.491  -3.413  1.00 96.03           O  
ATOM   4793  CG1 VAL A 302      22.146  -5.286  -5.502  1.00 96.03           C  
ATOM   4794 HG11 VAL A 302      22.605  -6.078  -6.094  1.00 96.03           H  
ATOM   4795 HG12 VAL A 302      21.306  -4.865  -6.054  1.00 96.03           H  
ATOM   4796 HG13 VAL A 302      21.782  -5.729  -4.575  1.00 96.03           H  
ATOM   4797  CG2 VAL A 302      23.798  -3.778  -6.547  1.00 96.03           C  
ATOM   4798 HG21 VAL A 302      23.023  -3.408  -7.218  1.00 96.03           H  
ATOM   4799 HG22 VAL A 302      24.543  -2.995  -6.402  1.00 96.03           H  
ATOM   4800 HG23 VAL A 302      24.287  -4.635  -7.010  1.00 96.03           H  
ATOM   4801  N   SER A 303      22.315  -3.578  -2.110  1.00 94.47           N  
ATOM   4802  H   SER A 303      23.319  -3.478  -2.061  1.00 94.47           H  
ATOM   4803  CA  SER A 303      21.585  -3.903  -0.878  1.00 94.47           C  
ATOM   4804  HA  SER A 303      21.039  -4.833  -1.037  1.00 94.47           H  
ATOM   4805  C   SER A 303      20.554  -2.824  -0.499  1.00 94.47           C  
ATOM   4806  CB  SER A 303      22.571  -4.135   0.276  1.00 94.47           C  
ATOM   4807  HB2 SER A 303      23.122  -3.221   0.498  1.00 94.47           H  
ATOM   4808  HB3 SER A 303      22.005  -4.417   1.164  1.00 94.47           H  
ATOM   4809  O   SER A 303      19.442  -3.149  -0.075  1.00 94.47           O  
ATOM   4810  OG  SER A 303      23.473  -5.184  -0.031  1.00 94.47           O  
ATOM   4811  HG  SER A 303      24.262  -4.835  -0.453  1.00 94.47           H  
ATOM   4812  N   PHE A 304      20.863  -1.539  -0.717  1.00 95.12           N  
ATOM   4813  H   PHE A 304      21.768  -1.324  -1.111  1.00 95.12           H  
ATOM   4814  CA  PHE A 304      19.926  -0.432  -0.478  1.00 95.12           C  
ATOM   4815  HA  PHE A 304      19.349  -0.667   0.416  1.00 95.12           H  
ATOM   4816  C   PHE A 304      18.890  -0.245  -1.595  1.00 95.12           C  
ATOM   4817  CB  PHE A 304      20.694   0.865  -0.190  1.00 95.12           C  
ATOM   4818  HB2 PHE A 304      21.419   1.045  -0.983  1.00 95.12           H  
ATOM   4819  HB3 PHE A 304      19.987   1.695  -0.192  1.00 95.12           H  
ATOM   4820  O   PHE A 304      17.754   0.119  -1.293  1.00 95.12           O  
ATOM   4821  CG  PHE A 304      21.387   0.850   1.158  1.00 95.12           C  
ATOM   4822  CD1 PHE A 304      20.622   0.933   2.338  1.00 95.12           C  
ATOM   4823  HD1 PHE A 304      19.550   1.049   2.277  1.00 95.12           H  
ATOM   4824  CD2 PHE A 304      22.783   0.705   1.242  1.00 95.12           C  
ATOM   4825  HD2 PHE A 304      23.376   0.647   0.342  1.00 95.12           H  
ATOM   4826  CE1 PHE A 304      21.247   0.842   3.595  1.00 95.12           C  
ATOM   4827  HE1 PHE A 304      20.659   0.892   4.499  1.00 95.12           H  
ATOM   4828  CE2 PHE A 304      23.408   0.613   2.498  1.00 95.12           C  
ATOM   4829  HE2 PHE A 304      24.479   0.485   2.556  1.00 95.12           H  
ATOM   4830  CZ  PHE A 304      22.641   0.672   3.674  1.00 95.12           C  
ATOM   4831  HZ  PHE A 304      23.125   0.593   4.636  1.00 95.12           H  
ATOM   4832  N   PHE A 305      19.219  -0.548  -2.855  1.00 94.67           N  
ATOM   4833  H   PHE A 305      20.176  -0.801  -3.058  1.00 94.67           H  
ATOM   4834  CA  PHE A 305      18.242  -0.540  -3.955  1.00 94.67           C  
ATOM   4835  HA  PHE A 305      17.609   0.340  -3.841  1.00 94.67           H  
ATOM   4836  C   PHE A 305      17.282  -1.744  -3.922  1.00 94.67           C  
ATOM   4837  CB  PHE A 305      18.966  -0.402  -5.303  1.00 94.67           C  
ATOM   4838  HB2 PHE A 305      19.879  -0.997  -5.294  1.00 94.67           H  
ATOM   4839  HB3 PHE A 305      18.329  -0.802  -6.092  1.00 94.67           H  
ATOM   4840  O   PHE A 305      16.121  -1.608  -4.311  1.00 94.67           O  
ATOM   4841  CG  PHE A 305      19.287   1.042  -5.650  1.00 94.67           C  
ATOM   4842  CD1 PHE A 305      18.314   1.846  -6.276  1.00 94.67           C  
ATOM   4843  HD1 PHE A 305      17.358   1.421  -6.544  1.00 94.67           H  
ATOM   4844  CD2 PHE A 305      20.531   1.602  -5.310  1.00 94.67           C  
ATOM   4845  HD2 PHE A 305      21.288   0.990  -4.843  1.00 94.67           H  
ATOM   4846  CE1 PHE A 305      18.580   3.201  -6.544  1.00 94.67           C  
ATOM   4847  HE1 PHE A 305      17.833   3.818  -7.023  1.00 94.67           H  
ATOM   4848  CE2 PHE A 305      20.798   2.955  -5.577  1.00 94.67           C  
ATOM   4849  HE2 PHE A 305      21.759   3.374  -5.313  1.00 94.67           H  
ATOM   4850  CZ  PHE A 305      19.819   3.759  -6.185  1.00 94.67           C  
ATOM   4851  HZ  PHE A 305      20.021   4.802  -6.383  1.00 94.67           H  
ATOM   4852  N   ALA A 306      17.707  -2.891  -3.384  1.00 95.11           N  
ATOM   4853  H   ALA A 306      18.693  -2.983  -3.184  1.00 95.11           H  
ATOM   4854  CA  ALA A 306      16.857  -4.065  -3.173  1.00 95.11           C  
ATOM   4855  HA  ALA A 306      16.239  -4.210  -4.060  1.00 95.11           H  
ATOM   4856  C   ALA A 306      15.907  -3.920  -1.965  1.00 95.11           C  
ATOM   4857  CB  ALA A 306      17.768  -5.288  -3.022  1.00 95.11           C  
ATOM   4858  HB1 ALA A 306      18.392  -5.396  -3.910  1.00 95.11           H  
ATOM   4859  HB2 ALA A 306      17.164  -6.187  -2.905  1.00 95.11           H  
ATOM   4860  HB3 ALA A 306      18.412  -5.172  -2.151  1.00 95.11           H  
ATOM   4861  O   ALA A 306      14.775  -4.412  -2.000  1.00 95.11           O  
ATOM   4862  N   LEU A 307      16.332  -3.222  -0.902  1.00 95.42           N  
ATOM   4863  H   LEU A 307      17.283  -2.882  -0.919  1.00 95.42           H  
ATOM   4864  CA  LEU A 307      15.567  -3.061   0.345  1.00 95.42           C  
ATOM   4865  HA  LEU A 307      15.516  -4.050   0.801  1.00 95.42           H  
ATOM   4866  C   LEU A 307      14.099  -2.619   0.147  1.00 95.42           C  
ATOM   4867  CB  LEU A 307      16.326  -2.117   1.305  1.00 95.42           C  
ATOM   4868  HB2 LEU A 307      15.625  -1.421   1.766  1.00 95.42           H  
ATOM   4869  HB3 LEU A 307      17.041  -1.523   0.736  1.00 95.42           H  
ATOM   4870  O   LEU A 307      13.220  -3.262   0.727  1.00 95.42           O  
ATOM   4871  CG  LEU A 307      17.078  -2.853   2.428  1.00 95.42           C  
ATOM   4872  HG  LEU A 307      17.679  -3.657   2.003  1.00 95.42           H  
ATOM   4873  CD1 LEU A 307      17.999  -1.877   3.161  1.00 95.42           C  
ATOM   4874 HD11 LEU A 307      18.754  -1.505   2.469  1.00 95.42           H  
ATOM   4875 HD12 LEU A 307      18.514  -2.395   3.971  1.00 95.42           H  
ATOM   4876 HD13 LEU A 307      17.429  -1.041   3.565  1.00 95.42           H  
ATOM   4877  CD2 LEU A 307      16.108  -3.442   3.459  1.00 95.42           C  
ATOM   4878 HD21 LEU A 307      16.677  -3.951   4.237  1.00 95.42           H  
ATOM   4879 HD22 LEU A 307      15.513  -2.649   3.912  1.00 95.42           H  
ATOM   4880 HD23 LEU A 307      15.446  -4.169   2.989  1.00 95.42           H  
ATOM   4881  N   PRO A 308      13.771  -1.603  -0.682  1.00 94.35           N  
ATOM   4882  CA  PRO A 308      12.391  -1.200  -0.964  1.00 94.35           C  
ATOM   4883  HA  PRO A 308      11.963  -0.783  -0.052  1.00 94.35           H  
ATOM   4884  C   PRO A 308      11.478  -2.332  -1.457  1.00 94.35           C  
ATOM   4885  CB  PRO A 308      12.504  -0.083  -2.007  1.00 94.35           C  
ATOM   4886  HB2 PRO A 308      11.679   0.626  -1.932  1.00 94.35           H  
ATOM   4887  HB3 PRO A 308      12.555  -0.506  -3.010  1.00 94.35           H  
ATOM   4888  O   PRO A 308      10.297  -2.349  -1.103  1.00 94.35           O  
ATOM   4889  CG  PRO A 308      13.843   0.563  -1.664  1.00 94.35           C  
ATOM   4890  HG2 PRO A 308      13.724   1.228  -0.809  1.00 94.35           H  
ATOM   4891  HG3 PRO A 308      14.273   1.092  -2.515  1.00 94.35           H  
ATOM   4892  CD  PRO A 308      14.689  -0.640  -1.266  1.00 94.35           C  
ATOM   4893  HD2 PRO A 308      15.450  -0.331  -0.549  1.00 94.35           H  
ATOM   4894  HD3 PRO A 308      15.156  -1.071  -2.151  1.00 94.35           H  
ATOM   4895  N   ALA A 309      11.996  -3.302  -2.219  1.00 95.27           N  
ATOM   4896  H   ALA A 309      12.986  -3.296  -2.419  1.00 95.27           H  
ATOM   4897  CA  ALA A 309      11.213  -4.452  -2.671  1.00 95.27           C  
ATOM   4898  HA  ALA A 309      10.269  -4.090  -3.080  1.00 95.27           H  
ATOM   4899  C   ALA A 309      10.874  -5.398  -1.504  1.00 95.27           C  
ATOM   4900  CB  ALA A 309      11.971  -5.164  -3.797  1.00 95.27           C  
ATOM   4901  HB1 ALA A 309      11.363  -5.979  -4.191  1.00 95.27           H  
ATOM   4902  HB2 ALA A 309      12.186  -4.463  -4.604  1.00 95.27           H  
ATOM   4903  HB3 ALA A 309      12.909  -5.576  -3.425  1.00 95.27           H  
ATOM   4904  O   ALA A 309       9.720  -5.807  -1.358  1.00 95.27           O  
ATOM   4905  N   GLY A 310      11.841  -5.678  -0.623  1.00 95.96           N  
ATOM   4906  H   GLY A 310      12.758  -5.291  -0.789  1.00 95.96           H  
ATOM   4907  CA  GLY A 310      11.623  -6.466   0.597  1.00 95.96           C  
ATOM   4908  HA2 GLY A 310      11.202  -7.436   0.334  1.00 95.96           H  
ATOM   4909  HA3 GLY A 310      12.584  -6.625   1.087  1.00 95.96           H  
ATOM   4910  C   GLY A 310      10.685  -5.777   1.596  1.00 95.96           C  
ATOM   4911  O   GLY A 310       9.792  -6.417   2.157  1.00 95.96           O  
ATOM   4912  N   ILE A 311      10.823  -4.458   1.763  1.00 96.05           N  
ATOM   4913  H   ILE A 311      11.600  -4.014   1.294  1.00 96.05           H  
ATOM   4914  CA  ILE A 311       9.963  -3.615   2.609  1.00 96.05           C  
ATOM   4915  HA  ILE A 311       9.962  -4.015   3.623  1.00 96.05           H  
ATOM   4916  C   ILE A 311       8.510  -3.651   2.113  1.00 96.05           C  
ATOM   4917  CB  ILE A 311      10.536  -2.175   2.657  1.00 96.05           C  
ATOM   4918  HB  ILE A 311      10.739  -1.855   1.635  1.00 96.05           H  
ATOM   4919  O   ILE A 311       7.593  -3.903   2.895  1.00 96.05           O  
ATOM   4920  CG1 ILE A 311      11.859  -2.143   3.462  1.00 96.05           C  
ATOM   4921 HG12 ILE A 311      12.479  -2.999   3.196  1.00 96.05           H  
ATOM   4922 HG13 ILE A 311      11.637  -2.225   4.526  1.00 96.05           H  
ATOM   4923  CG2 ILE A 311       9.535  -1.181   3.274  1.00 96.05           C  
ATOM   4924 HG21 ILE A 311       9.260  -1.512   4.275  1.00 96.05           H  
ATOM   4925 HG22 ILE A 311       9.971  -0.184   3.334  1.00 96.05           H  
ATOM   4926 HG23 ILE A 311       8.637  -1.106   2.661  1.00 96.05           H  
ATOM   4927  CD1 ILE A 311      12.697  -0.880   3.222  1.00 96.05           C  
ATOM   4928 HD11 ILE A 311      12.165   0.007   3.568  1.00 96.05           H  
ATOM   4929 HD12 ILE A 311      12.923  -0.773   2.161  1.00 96.05           H  
ATOM   4930 HD13 ILE A 311      13.634  -0.957   3.775  1.00 96.05           H  
ATOM   4931  N   LEU A 312       8.271  -3.456   0.812  1.00 95.96           N  
ATOM   4932  H   LEU A 312       9.043  -3.246   0.196  1.00 95.96           H  
ATOM   4933  CA  LEU A 312       6.911  -3.505   0.266  1.00 95.96           C  
ATOM   4934  HA  LEU A 312       6.255  -2.949   0.935  1.00 95.96           H  
ATOM   4935  C   LEU A 312       6.345  -4.931   0.246  1.00 95.96           C  
ATOM   4936  CB  LEU A 312       6.872  -2.839  -1.121  1.00 95.96           C  
ATOM   4937  HB2 LEU A 312       7.612  -3.321  -1.759  1.00 95.96           H  
ATOM   4938  HB3 LEU A 312       5.889  -3.013  -1.559  1.00 95.96           H
[truncated: 691,911 more chars]
