# Supplementary material for: MLe-KCNQ2: An Artificial Intelligence Model for the Prognosis of Missense KCNQ2 Gene Variants
Source: Int J Mol Sci. 2024 Mar 2;25(5):2910. doi: 10.3390/ijms25052910 (PMC10932340; doi:10.3390/ijms25052910)
Supplement: Supplementary file 1 [file ijms-25-02910-s001.zip › AUC_ROC_Scores.xlsx]

## Sheet: Sheet1
	AUC_ROC
AlphaMissense	0.959
BayesDel_addAF_rankscore	0.937
BayesDel_noAF_rankscore	0.918
CADD_raw_rankscore	0.786
CADD_raw_rankscore_hg19	0.771
ClinPred_rankscore	0.943
Conservation	0.865
CPT1	0.949
DANN_rankscore	0.658
DEOGEN2_rankscore	0.91
DeMaSK	0.706
DeMag	0.973
Eigen-raw_coding_rankscore	0.797
Eigen-PC-raw_coding_rankscore	0.756
ESM1b	0.908
EVE	0.921
fathmm-MKL_coding_rankscore	0.732
fathmm-XF_coding_rankscore	0.847
FATHMM_converted_rankscore	0.426
GenoCanyon_rankscore	0.759
GEMME	0.955
GERP++_RS_rankscore	0.584
GM12878_fitCons_rankscore	0.676
H1-hESC_fitCons_rankscore	0.688
HUVEC_fitCons_rankscore	0.765
integrated_fitCons_rankscore	0.75
KCNQ2_Index	0.97
LIST-S2_rankscore	0.805
LRT_converted_rankscore	0.612
mamPhCons	0.608
mamPhyloP	0.685
Maveric	0.982
MCapV	0.814
Mcap_sensitivity	0.816
M-CAP_rankscore	0.812
MetaSVM_rankscore	0.698
MetaLR_rankscore	0.735
mlKCNQ2	0.996
MTR	0.952
MutationTaster_converted_rankscore	0.799
MutationAssessor_rankscore	0.86
MutPred_rankscore	0.917
MVP_rankscore	0.941
MPC_rankscore	0.9
PHRED	0.787
pph2_prob	0.745
pph2_FPR	0.748
pph2_TPR	0.749
priPhCons	0.504
PolyPhenVal	0.758
priPhyloP	0.498
pLLDT	0.926
Polyphen2_HDIV_rankscore	0.709
Polyphen2_HVAR_rankscore	0.739
PrimateAI_rankscore	0.864
PROVEAN_converted_rankscore	0.899
phastCons100way_vertebrate_rankscore	0.64
phastCons17way_primate_rankscore	0.574
phyloP100way_vertebrate_rankscore	0.781
phyloP30way_mammalian_rankscore	0.715
phyloP17way_primate_rankscore	0.669
RawScore	0.787
REVEL	0.937
REVEL_rankscore	0.937
SIFTval	0.856
verPhCons	0.61
verPhyloP	0.766
VARITY	0.947
VARITY_R	0.948
VARITY_R_LOO	0.945
VARITY_ER	0.935
VARITY_ER_LOO	0.933
VEST4_rankscore	0.948
sift_score	0.869
SiPhy_29way_logOdds_rankscore	0.523
