# Supplementary material for: MLe-KCNQ2: An Artificial Intelligence Model for the Prognosis of Missense KCNQ2 Gene Variants
Source: Int J Mol Sci. 2024 Mar 2;25(5):2910. doi: 10.3390/ijms25052910 (PMC10932340; doi:10.3390/ijms25052910)
Supplement: Supplementary file 1 [file ijms-25-02910-s001.zip › Supp_Data_1_FINAL_DATASET_KCNQ2.xlsx]

## Sheet: Pathogenic
Variant	RIKEE	ClinVar	LOVD3	Clinical_certitude_HGMD_Alba		My_Label_PrimAD	Phenotype	Clinical_classification_RIKEE
M1V		Pathogenic/Likely pathogenic		DM	Pathogenic	pathogenic_variant	EIEE
M1K		Pathogenic/Likely pathogenic				pathogenic_variant	BFNC/EIEE
M1T		Pathogenic		DM	Pathogenic	pathogenic_variant	BFNC/EIEE
M1I		Pathogenic				pathogenic_variant	BFNC/EIEE
N79K				DM	Pathogenic	pathogenic_variant	BFNC
L81P		Likely pathogenic		DM	Pathogenic	pathogenic_variant	BFNC
P88L			pathogenic			pathogenic_variant
H96N		Pathogenic				pathogenic_variant	EIEE
H96P		Likely pathogenic		DM	Pathogenic	pathogenic_variant	BFNC/EIEE
V103D		Pathogenic				pathogenic_variant	EIEE
F104S		Likely pathogenic		DM	Pathogenic	pathogenic_variant	BFNC
L107F		Pathogenic	VUS	DM	Pathogenic	pathogenic_variant	BFNC/EIEE
S113F		Conflicting interpretations of pathogenicity		DM	Pathogenic	pathogenic_variant	EIEE
T114A	Pathogenic	not provided		DM	Pathogenic	pathogenic_variant	BFNC	self-limiting (BFNE)
T114I	Likely pathogenic	not provided		DM	Pathogenic	pathogenic_variant	EIEE	Uncertain severity
E119G	Pathogenic	not provided		DM	Pathogenic	pathogenic_variant	BFNC	self-limiting (BFNE)
S122L	Pathogenic	Pathogenic/Likely pathogenic	pathogenic	DM	Pathogenic	pathogenic_variant	BFNC/EIEE	self-limiting (BFNE)
E130K		Pathogenic	likely pathogenic	DM	Pathogenic	pathogenic_variant	EIEE
V132M		Conflicting interpretations of pathogenicity	likely pathogenic	DM	Pathogenic	pathogenic_variant	BFNC/EIEE
E140Q				DM	Pathogenic	Pathogenic_Variant	EIEE
R144W		Conflicting interpretations of pathogenicity	pathogenic	DM	Pathogenic	pathogenic_variant	BFNC/EIEE
R144Q	Likely pathogenic	Pathogenic/Likely pathogenic	pathogenic	DM	Pathogenic	pathogenic_variant	BFNC/EIEE	Likely epileptic encephalopathy (EE)
Y154H						pathogenic_variant	BFNC
Y154D	Pathogenic	not provided		DM	Pathogenic	pathogenic_variant	BFNC	self-limiting (BFNE)
G159R	Pathogenic	not provided		DM	Pathogenic	pathogenic_variant	BFNC	self-limiting (BFNE)
G159E	Pathogenic	not provided		DM	Pathogenic	pathogenic_variant	BFNC	self-limiting (BFNE)
L161P		Uncertain significance		DM	Pathogenic	pathogenic_variant	BFNC
C169R		Likely pathogenic	pathogenic			pathogenic_variant
V175L	Likely pathogenic	Pathogenic		DM	Pathogenic	pathogenic_variant	EIEE	Likely epileptic encephalopathy (EE)
V182M		Conflicting interpretations of pathogenicity		DM	Pathogenic	pathogenic_variant	BFNC/EIEE
A185T		Conflicting interpretations of pathogenicity		DM	Pathogenic	pathogenic_variant	BFNC/EIEE
S187Y				DM	Pathogenic	pathogenic_variant	EIEE
Q188K		Likely pathogenic		DM	Pathogenic	pathogenic_variant	EIEE
Q188P		Uncertain significance		DM	Pathogenic	pathogenic_variant	EIEE
G189V	Pathogenic	not provided	pathogenic	DM	Pathogenic	pathogenic_variant	EIEE	epileptic encephalopathy (EE)
N190S				DM	Pathogenic	pathogenic_variant	EIEE
N190I		Uncertain significance		DM	Pathogenic	pathogenic_variant	EIEE
A193D		Pathogenic		DM	Pathogenic	pathogenic_variant	EIEE
T194P				DM	Pathogenic	pathogenic_variant	EIEE
S195P	Likely pathogenic	Pathogenic/Likely pathogenic		DM	Pathogenic	pathogenic_variant	EIEE	Likely epileptic encephalopathy (EE)
S195F		Conflicting interpretations of pathogenicity	pathogenic			pathogenic_variant	BFNC/EIEE
A196V	Pathogenic	Pathogenic	pathogenic	DM	Pathogenic	pathogenic_variant	BFNC	self-limiting (BFNE)
L197P		Likely pathogenic		DM	Pathogenic	pathogenic_variant	BFNC/EIEE
R198Q		Pathogenic	pathogenic	DM	Pathogenic	pathogenic_variant	EIEE
L200P		Likely pathogenic		DM	Pathogenic	pathogenic_variant	BFNC/EIEE
R201C	Pathogenic	Conflicting interpretations of pathogenicity	pathogenic	DM	Pathogenic	pathogenic_variant	EIEE	Epileptic encephalopathy
R201H	Pathogenic	Pathogenic	pathogenic	DM	Pathogenic	pathogenic_variant	EIEE	Epileptic encephalopathy
L203P	Likely pathogenic	not provided		DM	Pathogenic	pathogenic_variant	EIEE	Likely epileptic encephalopathy (EE)
Q204R		Pathogenic		DM	Pathogenic	pathogenic_variant	EIEE
Q204H		Likely pathogenic		DM	Pathogenic	pathogenic_variant	BFNC
I205V	Pathogenic	Pathogenic		DM	Pathogenic	pathogenic_variant	EIEE	Epileptic encephalopathy (EE)
L206R		Pathogenic				pathogenic_variant	EIEE
R207W	Pathogenic	Pathogenic	VUS	DM	Pathogenic	pathogenic_variant	BFNC/EIEE	Myokimia
R207Q	Pathogenic	Pathogenic/Likely pathogenic	pathogenic	DM	Pathogenic	pathogenic_variant	EIEE	Myokimia
M208V	Pathogenic	Likely pathogenic		DM	Pathogenic	pathogenic_variant	BFNC	Likey self-limiting (BFNE)
I209T		Pathogenic				pathogenic_variant	BFNC
R210C	Pathogenic	Pathogenic	likely pathogenic	DM	Pathogenic	pathogenic_variant	EIEE	likely epileptic encephalopathy (EE)
R210H	Pathogenic	Pathogenic	pathogenic	DM	Pathogenic	pathogenic_variant	EIEE	Epileptic encephalopathy
R210P		Pathogenic	likely pathogenic	DM	Pathogenic	pathogenic_variant	EIEE
D212Y				DM	Pathogenic	pathogenic_variant	EIEE
D212A		Pathogenic				pathogenic_variant	EIEE
D212G	Likely pathogenic	Pathogenic		DM	Pathogenic	pathogenic_variant	BFNC	Likey self-limiting (BFNE)
D212E		Pathogenic	pathogenic	DM	Pathogenic	pathogenic_variant	BFNC/EIEE
R213W	Pathogenic	Pathogenic		DM	Pathogenic	pathogenic_variant	BFNC/EIEE	Likey self-limiting (BFNE)
R213Q	Pathogenic	Pathogenic/Likely pathogenic		DM	Pathogenic	pathogenic_variant	BFNC/EIEE	Likey self-limiting (BFNE)
R213L		Pathogenic				pathogenic_variant	BFNC
R214W	Pathogenic	Pathogenic/Likely pathogenic		DM	Pathogenic	pathogenic_variant	BFNC/EIEE	Epileptic encephalopathy (EE)
R214Q		Pathogenic		DM	Pathogenic	pathogenic_variant	EIEE
G215R	Likely pathogenic	not provided	pathogenic	DM	Pathogenic	pathogenic_variant	EIEE	Self-limiting (BFNE)
G216V		Pathogenic				pathogenic_variant
T217A	Likely pathogenic	Pathogenic		DM	Pathogenic	pathogenic_variant	BFNC/EIEE	Uncertain severity
W218R		Pathogenic				pathogenic_variant	EIEE
G222D		Uncertain significance	pathogenic			pathogenic_variant	EIEE
S223P		Pathogenic		DM	Pathogenic	pathogenic_variant	EIEE
V224A				DM	Pathogenic	pathogenic_variant	EIEE
H228Y		Likely pathogenic		DM	Pathogenic	pathogenic_variant	EIEE
H228R		not provided		DM	Pathogenic	pathogenic_variant	EIEE
H228Q	Pathogenic	Likely pathogenic		DM	Pathogenic	pathogenic_variant	BFNC/EIEE	Uncertain severity
S229I		Pathogenic				pathogenic_variant	EIEE
E231Q		Pathogenic				pathogenic_variant
E231G		Pathogenic		DM	Pathogenic	pathogenic_variant	BFNC/EIEE
E231D		Pathogenic/Likely pathogenic	pathogenic	DM?	Likely pathogenic	pathogenic_variant	EIEE
T234P	Likely pathogenic	not provided		DM	Pathogenic	pathogenic_variant	EIEE	Self-limiting (BFNE)
T234A		Pathogenic				pathogenic_variant	BFNC
T234I		Conflicting interpretations of pathogenicity		DM	Pathogenic	pathogenic_variant	BFNC/EIEE
A235V		Likely pathogenic	likely pathogenic	DM	Pathogenic	pathogenic_variant	EIEE
Y237C		Pathogenic	likely pathogenic	DM	Pathogenic	pathogenic_variant	EIEE
Y237F				DM	Pathogenic	pathogenic_variant	EIEE
G239R	Likely pathogenic	not provided		DM	Pathogenic	pathogenic_variant	EIEE	Likely epileptic encephalopathy (EE)
L241P		Pathogenic				pathogenic_variant	EIEE
C242G		Likely pathogenic		DM	Pathogenic	pathogenic_variant	EIEE
L243V		Likely pathogenic		DM	Pathogenic	pathogenic_variant	EIEE
L243F	Pathogenic	not provided	pathogenic	DM	Pathogenic	pathogenic_variant	BFNC	Likely epileptic encephalopathy (EE)
L245P		Pathogenic				pathogenic_variant	EIEE
A246P				DM	Pathogenic	pathogenic_variant	EIEE
S247W	Pathogenic	Pathogenic		DM	Pathogenic	pathogenic_variant	BFNC/EIEE	self-limiting (BFNE)
S247L		Pathogenic/Likely pathogenic	pathogenic	DM	Pathogenic	pathogenic_variant	EIEE
V250L		Pathogenic		DM	Pathogenic	pathogenic_variant	EIEE
V250G	Likely pathogenic	Likely pathogenic		DM	Pathogenic	pathogenic_variant	BFNC	Uncertain severity
A253T	Likely pathogenic	not provided		DM	Pathogenic	pathogenic_variant	EIEE	Uncertain severity
A253S		Pathogenic	VUS			pathogenic_variant	EIEE
E254A		Pathogenic				pathogenic_variant	BFNC
G256R		Likely pathogenic		DM	Pathogenic	pathogenic_variant	EIEE
G256W	Likely pathogenic			DM	Pathogenic	pathogenic_variant	EIEE	Uncertain severity
G256V		Pathogenic				pathogenic_variant	EIEE
N258S	Pathogenic	not provided		DM	Pathogenic	pathogenic_variant	BFNC	Uncertain severity
N258I				DM	Pathogenic	pathogenic_variant	EIEE
D259N		Conflicting interpretations of pathogenicity		DM	Pathogenic	benign_variant	BFNC/EIEE
D259Y		Pathogenic	likely pathogenic	DM	Pathogenic	pathogenic_variant	BFNC
H260Y		Conflicting interpretations of pathogenicity		DM	Pathogenic	pathogenic_variant	EIEE
F261I				DM	Pathogenic	pathogenic_variant	EIEE
F261S		Conflicting interpretations of pathogenicity		DM	Pathogenic	pathogenic_variant	EIEE
F261C		Likely pathogenic	likely pathogenic	DM	Pathogenic	pathogenic_variant	EIEE
T263I		Pathogenic	pathogenic	DM?	Likely pathogenic	pathogenic_variant	EIEE
Y264N		Likely pathogenic		DM	Pathogenic	pathogenic_variant	EIEE
A265T	Pathogenic	Pathogenic/Likely pathogenic	likely pathogenic	DM	Pathogenic	pathogenic_variant	EIEE	Epileptic encephalopathy (EE)
A265P	Pathogenic	not provided		DM	Pathogenic	pathogenic_variant	EIEE	Epileptic encephalopathy (EE)
A265G				DM	Pathogenic	pathogenic_variant	BFNC
A265V	Pathogenic	Pathogenic/Likely pathogenic	pathogenic	DM	Pathogenic	pathogenic_variant	EIEE	Epileptic encephalopathy (EE)
D266E		Pathogenic		DM	Pathogenic	pathogenic_variant	EIEE
L268F	Pathogenic	Pathogenic/Likely pathogenic		DM	Pathogenic	pathogenic_variant	EIEE	Likely epileptic encephalopathy (EE)
L268P		Pathogenic	likely pathogenic	DM	Pathogenic	pathogenic_variant	EIEE
W269S		Likely pathogenic	pathogenic			pathogenic_variant	EIEE
W269L		Likely pathogenic		DM	Pathogenic	pathogenic_variant	EIEE
W269C		Pathogenic				pathogenic_variant	BFNC
W270R				DM	Pathogenic	pathogenic_variant	EIEE
G271D		Likely pathogenic		DM	Pathogenic	pathogenic_variant	EIEE
G271V	Pathogenic	not provided		DM	Pathogenic	pathogenic_variant	BFNC	Self-limiting (BFNE)
I273N		Likely pathogenic		DM	Pathogenic	pathogenic_variant	EIEE
T274M	Pathogenic	Pathogenic	likely pathogenic	DM	Pathogenic	pathogenic_variant	EIEE	Epileptic encephalopathy (EE)
T276P				DM	Pathogenic	pathogenic_variant	BFNC
T276N		Pathogenic				pathogenic_variant	EIEE
T276I	Pathogenic	Pathogenic		DM	Pathogenic	pathogenic_variant	EIEE	Likely epileptic encephalopathy (EE)
T277A				DM	Pathogenic	pathogenic_variant	BFNC/EIEE
T277S		Likely pathogenic		DM	Pathogenic	pathogenic_variant	EIEE
T277I				DM	Pathogenic	pathogenic_variant	EIEE
I278T		Pathogenic/Likely pathogenic		DM	Pathogenic	pathogenic_variant	EIEE
G279S		Pathogenic		DM	Pathogenic	pathogenic_variant	EIEE
G279C	Likely pathogenic	Uncertain significance		DM	Pathogenic	pathogenic_variant	EIEE	Likely epileptic encephalopathy (EE)
Y280H		Pathogenic		DM	Pathogenic	pathogenic_variant	EIEE
G281R	Pathogenic	Conflicting interpretations of pathogenicity	pathogenic	DM	Pathogenic	pathogenic_variant	EIEE	Likely epileptic encephalopathy (EE)
G281W	Pathogenic	Pathogenic		DM	Pathogenic	pathogenic_variant	EIEE	Likely epileptic encephalopathy (EE)
D282N		Pathogenic/Likely pathogenic		DM	Pathogenic	pathogenic_variant	EIEE
D282H		Conflicting interpretations of pathogenicity		DM	Pathogenic	pathogenic_variant	EIEE
D282Y				DM	Pathogenic	pathogenic_variant	EIEE
D282V		Pathogenic		DM	Pathogenic	pathogenic_variant	EIEE
D282E			pathogenic	DM	Pathogenic	pathogenic_variant	EIEE
K283R		Pathogenic		DM	Pathogenic	pathogenic_variant	EIEE
Y284H		Pathogenic		DM	Pathogenic	pathogenic_variant	EIEE
Y284D		Pathogenic	likely pathogenic	DM	Pathogenic	pathogenic_variant	EIEE
Y284C	Pathogenic	Pathogenic		DM	Pathogenic	pathogenic_variant	BFNC	Self-limiting (BFNE)
P285T			pathogenic	DM	Pathogenic	pathogenic_variant	BFNC
P285S		Pathogenic/Likely pathogenic		DM	Pathogenic	pathogenic_variant	EIEE
P285H	Pathogenic	not provided		DM	Pathogenic	pathogenic_variant	EIEE	Likely epileptic encephalopathy (EE)
T287A				DM	Pathogenic	pathogenic_variant	EIEE
T287N	Pathogenic	not provided		DM	Pathogenic	pathogenic_variant	EIEE	Likely epileptic encephalopathy (EE)
G290S	Pathogenic	Pathogenic		DM	Pathogenic	pathogenic_variant	EIEE	Epileptic encephalopathy (EE)
G290D	Pathogenic	Pathogenic		DM	Pathogenic	pathogenic_variant	EIEE	Likey self-limiting (BFNE)
G290V		Pathogenic		DM	Pathogenic	pathogenic_variant	EIEE
R291G				DM	Pathogenic	pathogenic_variant	EIEE
R291S		Conflicting interpretations of pathogenicity		DM	Pathogenic	pathogenic_variant	EIEE
R291S		Likely pathogenic		DM	Pathogenic	pathogenic_variant	EIEE
L292P		Likely pathogenic		DM	Pathogenic	pathogenic_variant	EIEE
L293P		Pathogenic	likely pathogenic	DM?	Likely pathogenic	pathogenic_variant	EIEE
A294G	Pathogenic	not provided		DM	Pathogenic	pathogenic_variant	BFNC	Likey self-limiting (BFNE)
A294V	Pathogenic	Pathogenic	pathogenic	DM	Pathogenic	pathogenic_variant	EIEE	Likey self-limiting (BFNE)
T296P	Likely pathogenic	Likely pathogenic		DM	Pathogenic	pathogenic_variant	EIEE	Likely epileptic encephalopathy (EE)
G301S	Likely pathogenic	Conflicting interpretations of pathogenicity	pathogenic	DM	Pathogenic	pathogenic_variant	EIEE	Likely epileptic encephalopathy (EE)
G301D		Pathogenic	pathogenic	DM?	Likely pathogenic	pathogenic_variant	EIEE
G301V		Conflicting interpretations of pathogenicity	pathogenic	DM	Pathogenic	pathogenic_variant	EIEE
S303C		Pathogenic				pathogenic_variant	EIEE
F304S	Likely pathogenic	Pathogenic/Likely pathogenic		DM	Pathogenic	pathogenic_variant	EIEE	Likely epileptic encephalopathy (EE)
F305L	Likely pathogenic	Pathogenic/Likely pathogenic		DM	Pathogenic	pathogenic_variant	EIEE	Uncertain severiy
A306T	Pathogenic	Pathogenic	pathogenic	DM	Pathogenic	pathogenic_variant	BFNC	Self-limiting (BFNE)
A306P		Pathogenic		DM	Pathogenic	pathogenic_variant	EIEE
A306V	Pathogenic	Pathogenic	likely pathogenic	DM	Pathogenic	pathogenic_variant	EIEE	Epileptic encephalopathy (EE)
P308S		Likely pathogenic		DM	Pathogenic	pathogenic_variant	EIEE
P308L			likely pathogenic	DM	Pathogenic	pathogenic_variant	EIEE
A309V	Pathogenic	Pathogenic		DM	Pathogenic	pathogenic_variant	EIEE	Likely epileptic encephalopathy (EE)
G310S		Conflicting interpretations of pathogenicity		DM	Pathogenic	pathogenic_variant	EIEE
I311M				DM	Pathogenic	pathogenic_variant	EIEE
G313R				DM	Pathogenic	pathogenic_variant	EIEE
S314T				DM	Pathogenic	pathogenic_variant	BFNC/EIEE
G315R	Pathogenic	Pathogenic		DM	Pathogenic	pathogenic_variant	EIEE	Likely epileptic encephalopathy (EE)
G315E				DM	Pathogenic	pathogenic_variant	EIEE
G315A			pathogenic			pathogenic_variant
K319T				DM	Pathogenic	pathogenic_variant	EIEE
V320I		Likely pathogenic		DM	Pathogenic	pathogenic_variant	BFNC
H324R				DM	Pathogenic	pathogenic_variant	EIEE
R325G	Pathogenic	not provided		DM	Pathogenic	pathogenic_variant	EIEE	Epileptic encephalopathy (EE)
K327M				DM	Pathogenic	pathogenic_variant	EIEE
R332G		Likely pathogenic		DM	Pathogenic	pathogenic_variant	EIEE
R332K		Uncertain significance		DM	Pathogenic	pathogenic_variant	EIEE
R333W	Pathogenic	Pathogenic	pathogenic	DM	Pathogenic	pathogenic_variant	EIEE	Epileptic encephalopathy (EE)
R333Q	Pathogenic	Pathogenic	likely pathogenic	DM	Pathogenic	pathogenic_variant	BFNC	Uncertain severity
P335A		Pathogenic				pathogenic_variant	EIEE
P335R				DM	Pathogenic	pathogenic_variant	BFNC
P335L		Pathogenic/Likely pathogenic	pathogenic	DM?	Likely pathogenic	pathogenic_variant	EIEE
A337T		Pathogenic		DM	Pathogenic	pathogenic_variant	EIEE
A337G	Pathogenic	Pathogenic		DM	Pathogenic	pathogenic_variant	EIEE	Uncertain severity
L339Q		Likely pathogenic		DM	Pathogenic	pathogenic_variant	BFNC/EIEE
L339R	VUS	Pathogenic		DM	Pathogenic	pathogenic_variant	BFNC
I340N				DM	Pathogenic	pathogenic_variant	BFNC
I340T				DM	Pathogenic	pathogenic_variant	EIEE
I340M		Likely pathogenic		DM	Pathogenic	pathogenic_variant	BFNC/EIEE
Q341H		Pathogenic		DM	Pathogenic	pathogenic_variant	EIEE
A343G				DM	Pathogenic	pathogenic_variant	BFNC/EIEE
W344R	Pathogenic	not provided	pathogenic	DM	Pathogenic	pathogenic_variant	BFNC	Self-limiting (BFNE)
A348T		Pathogenic	VUS			pathogenic_variant	EIEE
N350H				DM	Pathogenic	pathogenic_variant	BFNC
N350I		Likely pathogenic		DM	Pathogenic	pathogenic_variant	BFNC/EIEE
L351V	Likely pathogenic	Likely pathogenic	VUS	DM	Pathogenic	pathogenic_variant	BFNC	Likey self-limiting (BFNE)
L351F	Pathogenic	Pathogenic	pathogenic	DM	Pathogenic	pathogenic_variant	BFNC	Likey self-limiting (BFNE)
S352P	Pathogenic	not provided		DM	Pathogenic	pathogenic_variant	BFNC	Self-limiting (BFNE)
R353G	Pathogenic	not provided	VUS	DM	Pathogenic	pathogenic_variant	BFNC	Self-limiting (BFNE)
R353C		Conflicting interpretations of pathogenicity		DM	Pathogenic	pathogenic_variant	BFNC/EIEE
R353H	Pathogenic	Pathogenic/Likely pathogenic		DM	Pathogenic	pathogenic_variant	EIEE	Pathogenic
D355G		Pathogenic				pathogenic_variant	EIEE
D355E		Uncertain significance	pathogenic	DM	Pathogenic	pathogenic_variant	BFNC
L356V	VUS	not provided		DM	Pathogenic	pathogenic_variant	BFNC
L356Q		Pathogenic				pathogenic_variant	EIEE
L356R		Likely pathogenic	likely pathogenic	DM	Pathogenic	pathogenic_variant	EIEE
S358F	Pathogenic	not provided		DM	Pathogenic	pathogenic_variant	BFNC	Self-limiting (BFNE)
T359A		Conflicting interpretations of pathogenicity		DM	Pathogenic	pathogenic_variant	EIEE
T359K	Pathogenic	Pathogenic	pathogenic	DM	Pathogenic	pathogenic_variant	BFNC	Uncertain severity
Y362C	Pathogenic	not provided	pathogenic	DM	Pathogenic	pathogenic_variant	BFNC	Self-limiting (BFNE)
Y363H			likely pathogenic	DM	Pathogenic	pathogenic_variant	EIEE
Y363C		Uncertain significance		DM	Pathogenic	pathogenic_variant	EIEE
R395G				DM	Pathogenic	pathogenic_variant	BFNC
D488E				DM	Pathogenic	pathogenic_variant	EIEE
A501P	VUS	not provided		DM	Pathogenic	pathogenic_variant	EIEE
R504W				DM	Pathogenic	pathogenic_variant	BFNC
R541G	Likely pathogenic	not provided		DM	Pathogenic	pathogenic_variant	EIEE	Uncertain severity
M546V	Pathogenic	Pathogenic		DM	Pathogenic	pathogenic_variant	EIEE	Likely epileptic encephalopathy (EE)
M546T		Pathogenic/Likely pathogenic	pathogenic			pathogenic_variant	EIEE
R547W	Likely pathogenic	Pathogenic/Likely pathogenic	VUS	DM	Pathogenic	pathogenic_variant	BFNC	Uncertain severity
K552T	Pathogenic	not provided		DM	Pathogenic	pathogenic_variant	EIEE	Likely epileptic encephalopathy (EE)
R553W	Pathogenic	Pathogenic	pathogenic	DM	Pathogenic	pathogenic_variant	EIEE	Likely epileptic encephalopathy (EE)
R553Q	Pathogenic	Pathogenic	likely pathogenic	DM	Pathogenic	pathogenic_variant	BFNC	Self-limiting (BFNE)
R553L	Pathogenic	Pathogenic		DM	Pathogenic	pathogenic_variant	EIEE	Likely epileptic encephalopathy (EE)
K554N		Pathogenic		DM	Pathogenic	pathogenic_variant	BFNC
F555L		Likely pathogenic		DM	Pathogenic	pathogenic_variant	BFNC
K556E	Pathogenic	Pathogenic		DM	Pathogenic	pathogenic_variant	EIEE	Likely epileptic encephalopathy (EE)
R560W	Pathogenic	Pathogenic/Likely pathogenic	VUS	DM	Pathogenic	pathogenic_variant	EIEE	Likely epileptic encephalopathy (EE)
R560Q		Likely pathogenic		DM	Pathogenic	pathogenic_variant	EIEE
P561S		Pathogenic		DM	Pathogenic	pathogenic_variant	EIEE
P561R		Uncertain significance		DM	Pathogenic	pathogenic_variant	EIEE
P561L	Pathogenic	Pathogenic		DM	Pathogenic	pathogenic_variant	EIEE	Likely epileptic encephalopathy (EE)
D563N	Pathogenic	Pathogenic		DM	Pathogenic	pathogenic_variant	EIEE	Epileptic encephalopathy (EE)
D563Y		Pathogenic	pathogenic	DM?	Likely pathogenic	pathogenic_variant	EIEE
D563G		Pathogenic				pathogenic_variant	EIEE
D563E	Pathogenic	not provided		DM	Pathogenic	pathogenic_variant	EIEE	Likely epileptic encephalopathy (EE)
M565T			likely pathogenic	DM	Pathogenic	pathogenic_variant	EIEE
D566H				DM	Pathogenic	pathogenic_variant	BFNC
V567D		Pathogenic		DM	Pathogenic	pathogenic_variant	BFNC
I568T				DM	Pathogenic	pathogenic_variant	EIEE
G574D		Likely pathogenic		DM	Pathogenic	pathogenic_variant	BFNC
M578V	Pathogenic	Likely pathogenic	likely pathogenic	DM	Pathogenic	pathogenic_variant	BFNC	Likely self-limiting (BFNE)
M578I	Pathogenic	Pathogenic		DM	Pathogenic	pathogenic_variant	EIEE	Likely epileptic encephalopathy (EE)
R581G	Pathogenic	Pathogenic		DM	Pathogenic	pathogenic_variant	EIEE	Likely epileptic encephalopathy (EE)
R581Q		Pathogenic/Likely pathogenic	VUS	DM	Pathogenic	pathogenic_variant	EIEE
R581L		Likely pathogenic	pathogenic	DM	Pathogenic	pathogenic_variant	EIEE
I582F			likely pathogenic	DM	Pathogenic	pathogenic_variant	EIEE
K583N		Likely pathogenic		DM	Pathogenic	pathogenic_variant	EIEE
R588S	Pathogenic	not provided		DM	Pathogenic	pathogenic_variant	BFNC	Self-limiting (BFNE)
V589G				DM	Pathogenic	pathogenic_variant	BFNC
I592M	Pathogenic	not provided		DM	Pathogenic	pathogenic_variant	BFNC	Self-limiting (BFNE)
L637R	Pathogenic	not provided		DM	Pathogenic	pathogenic_variant	BFNC	Self-limiting (BFNE)
T716I		Pathogenic	likely pathogenic			pathogenic_variant

## Sheet: Tolerated
Variant	Non_Neuro per million	RIKEE	ClinVar	LOVD3
G8S	11.2155		Uncertain significance
G8R	3.73851
G9A	6.43376
P12S	3.991
S15G	6.4293
G16R	3.98019
G16E	3.98019
V25M	4.04343
P29S	12.2384
G30S	16.3592		Uncertain significance
G30A	4.08981
S34F	4.08163
A43V	97.5348		Conflicting interpretations of pathogenicity
L54F	4.0467
G60A	4.05551
A62V	59.9673		Likely benign
A64S	48.7805		Conflicting interpretations of pathogenicity
G65R	8.09468
P67S	12.0857		Uncertain significance
P68S	4.01723
A72T	3.9909
R75H	3.94515
Q78K	3.88381
W91G	5.19019
A97V	32.0533		Uncertain significance
I115L	2.92177
E117G	2.75156
E117D	8.25468		Uncertain significance
A125V	2.92363
V135M	20.4585
V135L	2.92264		Uncertain significance
V139M	8.76486		Uncertain significance
F142L	5.8432
V143M	8.76532		Uncertain significance
V143L	2.92177
R160Q	2.92216
R165W	5.84515			VUS
R165Q	11.6903		Uncertain significance
P167L	2.92223
L176V	3.039
I177V	9.08507		Uncertain significance
A196G	3.02825
V225I	3.43813
G256E	2.91836
D259H	5.83642
I278V	5.84401
R365Q	2.91751
V367I	25.6243		Uncertain significance
V367A	6.40607
T368S	2.91749
V369M	2.82952
P370L	13.7337
M371R	2.91722
Y372C	2.9174
S374L	17.5167		Conflicting interpretations of pathogenicity
Q375E	11.6728
Y379S	2.91821
G380A	2.91845
I385L	3.18775
P386T	3.24794
P386S	3.24794
P387S	6.46141
N396S	13.0973
S399G	6.65868
L403F	3.44923
A404T	13.8361		Uncertain significance
D408E	3.60576
P410L	29.4646		Uncertain significance
P411L	18.4108		Likely benign
P413L	7.35689
G418A	5.59782
G418V	254.701		Benign/Likely benign
S419I	2.975
P424S	71.0858		Conflicting interpretations of pathogenicity
P424L	2.96191
P430L	5.58101
G431R	17.8187		Uncertain significance	VUS
R432C	62.4747		Conflicting interpretations of pathogenicity
R432L	2.97499
Q435R	3.04592
V437I	3.13113
S438T	3.10166
D441N	21.3318
D441G	3.04741
P447A	6.04752
G449S	3.01201
V450M	1146.78		Benign/Likely benign	likely benign
A451V	12.0427		Uncertain significance
G456W	2.99593
G456E	2.99593
P458S	50.8811
V463M	2.98071
R464S	2.978
D470N	11.8907		Uncertain significance
S472N	2.96784
E474K	12.8202
S478G	12.823
S478N	6.41149
G487R	5.90392
R489G	8.84815		Uncertain significance
R489C	2.94938
R489H	5.89877
R493H	8.83949
R493L	2.9465
A495P	20.62		Uncertain significance
F496I	8.83192		Uncertain significance
R497C	14.7144		Uncertain significance
I498L	5.88639
K499R	5.88661
A502T	20.6021		Uncertain significance
A502V	29.4315		Conflicting interpretations of pathogenicity
R504Q	14.7183		Uncertain significance
N506H	2.94342
N506Y	2.94342
N506S	2.94342
E508G	2.94454
E509A	25.6634		Uncertain significance
G514R	14.7308		Uncertain significance
E515D	2131.54	Non-pathogenic	Conflicting interpretations of pathogenicity	likely benign
D516E	2.9441
I517V	8.83174
I517T	5.88783
D520N	2.94273
D520G	14.7137		Uncertain significance
S522N	2.85284
C523Y	2.81025
E526K	5.88311
E526Q	2.94156
F527I	11.7664
T529S	2.94156
E530A	2.9416
L532P	2.94209
P534L	2.94263
K537R	5.8862
V564L	2.91872
V593M	11.9009		Uncertain significance
V593L	2.97522
P597Q	5.96972
A598T	2.99125
T600P	2.99198
D601N	20.9385
R604S	6.4096
R604C	19.2288		Uncertain significance
R604H	25.6384		Uncertain significance
T605S	65.1414		Conflicting interpretations of pathogenicity
P608L	12.0882		Uncertain significance
A611T	9.06635
A611S	9.06635
A611V	148.084		Benign/Likely benign	VUS
P617S	11.9974
G624R	9.00203		Uncertain significance
K625R	2.99872
M633V	2.86692
M633T	11.4677		Uncertain significance
E634Q	5.73102
K635N	2.9537
L640M	5.01953
M645V	3.04306
M645T	3.04306
M645I	3.04306
R647Q	30.4494		Uncertain significance	likely benign
M648L	3.04439
G649D	3.04653
G649A	6.09307
G649V	3.04653
P651R	9.13887
P652Q	3.05133
P652R	18.308		Uncertain significance
P652L	27.462		Conflicting interpretations of pathogenicity
T653P	3.04878
A657T	18.3074		Uncertain significance
Y658D	3.05388
Y658C	9.16165
F659S	9.17224
G660R	3.05545
G660V	3.05545
E663G	24.4777
P664T	6.40705
P664L	57.6635		Uncertain significance
P666Q	3.0725
P668L	12.2812
P673L	5.70184
D675N	11.3898
D675G	2.84746
D675E	22.7797		Uncertain significance
R677W	14.2214		Uncertain significance
R677Q	5.68854
H679R	12.0911
H683Q	2.8417
G684S	18.1507		Uncertain significance
I686V	30.2704		Uncertain significance	VUS
I689L	1731.9		Benign	likely benign
I689M	2.84852
V690M	17.1123		Uncertain significance
R691H	24.3565		Conflicting interpretations of pathogenicity
R691P	3.04457
S694T	24.4436		Uncertain significance
T696M	185.081		Conflicting interpretations of pathogenicity
G697S	9.26481		Uncertain significance
G697V	3.08827
A703V	23.0688		Uncertain significance	VUS
P705S	3.37829
P705L	16.8914		Uncertain significance
A707T	93.8041		Conflicting interpretations of pathogenicity
A707V	10.4227		Uncertain significance
P708A	24.8183		Uncertain significance
P713A	6.93044
P714H	3.61539
P724S	3.93518
P724L	23.6111		Uncertain significance
R725C	31.6221		Conflicting interpretations of pathogenicity
R725L	3.95276
H728Q	3.66886
S731A	4.02904
P732T	8.08133
P732S	20.2033		Uncertain significance
D735A	20.5443
G737S	16.5336		Conflicting interpretations of pathogenicity
V740M	4.13563
R741L	8.33243
P743L	12.4825		Uncertain significance
H748Q	7.38618
S751L	91.3542		Uncertain significance
A754T	19.3997		Uncertain significance
Y755C	2189.81		Benign/Likely benign
G756S	335.591		Benign/Likely benign
N759K	8.312
R760C	12.2709		Uncertain significance
R760H	40.9031		Uncertain significance
A761S	33.9287		Conflicting interpretations of pathogenicity	likely benign
F765L	3.76949
R767Q	22.2112		Uncertain significance
Q768R	7.14755
T771I	34.1059		Conflicting interpretations of pathogenicity	likely benign
P772A	3.38327
P772R	10.1498
P772L	37.216		Uncertain significance
G773S	3.36763
C774Y	23.0033
P776H	15.8843
P777S	9.42863		Conflicting interpretations of pathogenicity
P777R	81.7148		Likely benign
P777L	3.14288
E778K	15.6183		Uncertain significance
E778V	3.12365
G779E	3.08356
G779V	3.08356
N780T	604614		Benign	benign
R782W	18.1717		Uncertain significance
R782Q	12.1145		Uncertain significance
V793M	8.85468		Uncertain significance
V793L	35.4187		Likely benign
H795N	8.32358
E796K	2.94528
R800C	5.88363
R800H	8.82545
G804S	2.93929
K811R	5.87599
N813S	2.93682
A822T	17.6098		Uncertain significance
A822P	2.93496
A822E	2.93496
V824L	2.93537
A828V	8.80703
K829E	5.86989
V830I	2.93544
P832L	2.93741
E836G	2.94446
E838G	2.95458
T847I	3.02678
P848L	21.4247		Uncertain significance
C849F	12.4619		Uncertain significance
C849W	3.11548
G850R	9.3276		Uncertain significance
P852A	2.93202
R854C	207.161		Benign
R854H	5.83553
S855L	9.17639		Conflicting interpretations of pathogenicity
T857A	2.87947
T857I	14.3974
G858S	34.661		Conflicting interpretations of pathogenicity	VUS
V865M	6.2822
V865G	6.2822
G869R	9.60689
G869E	3.2023
