# Supplementary material for: MLe-KCNQ2: An Artificial Intelligence Model for the Prognosis of Missense KCNQ2 Gene Variants
Source: Int J Mol Sci. 2024 Mar 2;25(5):2910. doi: 10.3390/ijms25052910 (PMC10932340; doi:10.3390/ijms25052910)
Supplement: Supplementary file 1 [file ijms-25-02910-s001.zip › Supp_Data_2_KCNQ2_Performance_Tools.xlsx]

## Sheet: Hoja1
VEP	TOTAL	PATHOLOGICAL	TOLERATED
PERFECT	1	1	1
Mle_KCNQ2	0.975	0.981	0.969
KCNQ2_Index	0.916071	0.936567	0.89726
DeMag	0.915	0.981273	0.854
Maverick	0.899	0.985019	0.819
GEMME	0.892857	0.846442	0.9375
MutScore	0.881508	0.981132	0.791096
VEST4	0.876786	0.880597	0.873288
CPT1	0.876786	0.846442	0.913194
VARITY_R	0.875	0.865672	0.883562
VARITY_R_LOO	0.871429	0.899254	0.84589
MVP	0.867857	0.947761	0.794521
VARITY	0.858929	0.929104	0.794521
REVEL	0.857143	0.94403	0.777397
VARITY_ER	0.857143	0.843284	0.869863
DEOGEN2	0.85	0.847015	0.85274
EVE	0.842857	0.850746	0.835616
AlphaMissense	0.839286	0.94403	0.743151
SIFT4G	0.837	0.804	0.867
MPC	0.832143	0.798507	0.863014
MutTaster	0.83209	0.633562	0.732826
SIFT	0.83	0.9	0.765
PROVEAN	0.826786	0.787313	0.863014
AlphDeogenRevel	0.818345	0.988636	0.664384
AlphDeogen	0.81295	0.969697	0.671233
ESM1b	0.808929	0.746269	0.866438
MutAssessor	0.805357	0.791045	0.818493
PrimateAI	0.801786	0.854478	0.753425
AlphScore	0.796763	0.693182	0.890411
AlphCaddDeogen	0.791367	0.958333	0.640411
AlphRevel	0.789568	0.981061	0.616438
Conservation	0.785714	0.798507	0.773973
phylo_vert	0.784	0.742	0.823
HUVEC_fit	0.782143	0.839552	0.729452
AlphRevelCadd	0.780576	0.981061	0.599315
MutPred	0.780357	0.835821	0.729452
int_fit	0.780357	0.768657	0.791096
DeogenRevel	0.766187	0.988636	0.565068
CaddDeogen	0.76259	0.958333	0.585616
SNAP2	0.757143	0.929104	0.599315
M-CAP	0.746429	0.828358	0.671233
GenoCanyon	0.746429	0.779851	0.715753
AlphCadd	0.73741	0.954545	0.541096
LIST-S2	0.728571	0.705224	0.75
CaddDeogenRevel	0.726619	0.992424	0.486301
phast_mamm	0.714286	0.791045	0.643836
PHRED	0.714286	0.720149	0.708904
H1-hESC_fit	0.714286	0.623134	0.797945
RevelCadd	0.701439	0.977273	0.452055
CADD	0.696043	0.897727	0.513699
ClinPred	0.694643	0.996269	0.417808
PolyPhenVal	0.694643	0.697761	0.691781
Polyphen2_HVAR	0.692857	0.738806	0.650685
MCapV	0.691071	0.94403	0.458904
BayesDel_noAF	0.689286	0.981343	0.421233
Suspect	0.689286	0.440299	0.917808
GM_fitCons	0.683929	0.619403	0.743151
BayesDel_addAF	0.682143	0.988806	0.400685
Eigen-PC	0.682143	0.80597	0.568493
Eigen	0.675	0.764925	0.592466
ENVISION	0.675	0.697761	0.65411
gMSP	0.674419	1	0.376712
RaSP_ml_f	0.671429	0.645522	0.695205
phylo_primate	0.669	0.432	0.888
Polyphen2_HDIV	0.667857	0.738806	0.60274
RaSP_ml	0.6625	0.66791	0.657534
phylo_mam	0.657	0.421	0.874
MetaSVM	0.653571	0.764925	0.55137
fathmm-XF	0.646429	0.936567	0.380137
pph2_prob	0.635714	0.925373	0.369863
DANN	0.628571	0.914179	0.366438
phast_vert	0.623214	0.873134	0.393836
DeMaSK	0.619643	0.798507	0.455479
MutHTP	0.611	0.985	0.267
LRT	0.575	0.75	0.414384
MetaLR	0.573214	0.996269	0.184932
SiPhy_29way	0.566071	0.779851	0.369863
phast_prim	0.558929	0.66791	0.458904
GERP++_RS	0.557143	0.83209	0.304795
fathmm-MKL	0.551786	0.973881	0.164384
Panther	0.506	0.83209	0.12931
SNP_Index	0.502	0.817164	0.137931
PhD	0.458	0.787313	0.0775862
