# Supplementary material for: MLe-KCNQ2: An Artificial Intelligence Model for the Prognosis of Missense KCNQ2 Gene Variants
Source: Int J Mol Sci. 2024 Mar 2;25(5):2910. doi: 10.3390/ijms25052910 (PMC10932340; doi:10.3390/ijms25052910)
Supplement: Supplementary file 1 [file ijms-25-02910-s001.zip › Supp_Data_3_KCNQ2_All_Predictions.xlsx]

## Sheet: Support Vector Machine
Variant	Prediction	Score	Label	Group
G310S	1	0.901225	1	Train
A253T	1	0.979745	1	Train
L243F	1	0.982839	1	Train
R547W	1	0.884908	1	Train
L268F	1	0.957359	1	Train
D282Y	1	0.957399	1	Train
R201C	1	0.957375	1	Train
R207W	1	0.95751	1	Train
P88L	1	0.894645	1	Train
M208V	1	0.970134	1	Train
P335R	1	0.987147	1	Train
Y284H	1	0.972904	1	Train
N79K	1	0.486735	1	Train
Y264N	1	0.996372	1	Train
L81P	1	0.67705	1	Train
R333Q	1	0.982337	1	Train
G159R	1	0.947215	1	Train
A193D	1	0.957437	1	Train
R553Q	1	0.948049	1	Train
M546V	1	0.536128	1	Train
R144Q	1	0.589349	1	Train
G301S	1	0.967336	1	Train
R553L	1	0.957433	1	Train
T263I	1	0.999993	1	Train
G301D	1	0.979075	1	Train
R201H	1	0.96875	1	Train
T276N	1	0.957382	1	Train
K552T	1	0.93702	1	Train
A294V	1	0.806756	1	Train
S223P	1	0.999988	1	Train
R553W	1	0.957397	1	Train
P561S	1	0.986127	1	Train
N190S	1	0.957337	1	Train
L161P	1	0.85413	1	Train
F555L	1	0.983018	1	Train
R210P	1	0.973184	1	Train
A294G	1	0.826736	1	Train
G279S	1	0.9606	1	Train
E130K	1	0.954107	1	Train
T234I	1	0.999993	1	Train
W269C	1	0.982246	1	Train
C169R	1	0.992928	1	Train
K319T	1	0.981141	1	Train
R207Q	1	0.964017	1	Train
T114I	1	0.947923	1	Train
A343G	1	0.957412	1	Train
S113F	1	0.957381	1	Train
V320I	1	0.99265	1	Train
T287A	1	0.999994	1	Train
T277S	1	0.96045	1	Train
A265V	1	0.957345	1	Train
L200P	1	0.973371	1	Train
T287N	1	0.990643	1	Train
A185T	1	0.957812	1	Train
D212Y	1	0.960866	1	Train
V589G	1	0.917616	1	Train
P285T	1	0.975308	1	Train
D566H	1	0.784051	1	Train
R213W	1	0.95734	1	Train
S314T	1	0.991724	1	Train
Q341H	1	0.962432	1	Train
D282V	1	0.957407	1	Train
R214W	1	0.957304	1	Train
E119G	1	0.415287	1	Train
V224A	1	0.950975	1	Train
S352P	1	0.964336	1	Train
C242G	1	0.996225	1	Train
I582F	1	0.986247	1	Train
R144W	1	0.879156	1	Train
A348T	1	0.972818	1	Train
K583N	1	0.975755	1	Train
Y363H	1	0.974087	1	Train
M578I	1	0.996292	1	Train
T234P	1	0.999998	1	Train
A246P	1	0.986015	1	Train
R395G	0	0.190274	1	Train
G271V	1	0.980842	1	Train
P308L	1	0.921653	1	Train
I311M	1	0.978201	1	Train
P561L	1	0.983995	1	Train
A265G	1	0.960776	1	Train
H260Y	1	0.848395	1	Train
M565T	1	0.878832	1	Train
L351F	1	0.935024	1	Train
L637R	1	0.771005	1	Train
G216V	1	0.980637	1	Train
G256R	1	0.708483	1	Train
N190I	1	0.957372	1	Train
W344R	1	0.988688	1	Train
R214Q	1	0.963754	1	Train
R353G	1	0.970904	1	Train
E231Q	1	0.993158	1	Train
M1I	1	0.957377	1	Train
I278T	1	0.957405	1	Train
L356Q	1	0.965054	1	Train
Y362C	1	0.992499	1	Train
A196V	1	0.957426	1	Train
Q204R	1	0.974996	1	Train
I340M	1	0.957441	1	Train
I340T	1	0.963594	1	Train
L351V	1	0.729811	1	Train
D282H	1	0.961087	1	Train
Q204H	1	0.972758	1	Train
A265T	1	0.96075	1	Train
H324R	1	0.999992	1	Train
M546T	1	0.528026	1	Train
R332K	1	0.982964	1	Train
V132M	1	0.957408	1	Train
E231G	1	0.991494	1	Train
R588S	1	0.797508	1	Train
S195P	1	0.99999	1	Train
L243V	1	0.984932	1	Train
V250L	1	0.991685	1	Train
E231D	1	0.993158	1	Train
G290V	1	0.996821	1	Train
S229I	1	0.999995	1	Train
N350H	1	0.916217	1	Train
M1V	1	0.958073	1	Train
W269L	1	0.980083	1	Train
G315A	1	0.999994	1	Train
F304S	1	0.991333	1	Train
Q188K	1	0.957365	1	Train
S247W	1	0.992698	1	Train
R291S	1	0.957412	1	Train
I209T	1	0.978248	1	Train
D488E	0	0.00276504	1	Train
G281W	1	0.957367	1	Train
F104S	1	0.929879	1	Train
R541G	1	0.962161	1	Train
V250G	1	0.995353	1	Train
K554N	1	0.965328	1	Train
Y284C	1	0.961538	1	Train
D259Y	1	0.877725	1	Train
R291G	1	0.958364	1	Train
G290D	1	0.983087	1	Train
L203P	1	0.975555	1	Train
P561R	1	0.991037	1	Train
I273N	1	0.978437	1	Train
A235V	1	0.975355	1	Train
K556E	1	0.987935	1	Train
P285S	1	0.975466	1	Train
G271D	1	0.980899	1	Train
T716I	1	0.95567	1	Train
T234A	1	0.999997	1	Train
D563Y	1	0.97049	1	Train
G222D	1	0.982898	1	Train
T217A	1	0.983804	1	Train
P285H	1	0.978804	1	Train
P335L	1	0.989019	1	Train
D563N	1	0.880243	1	Train
V175L	1	0.435833	1	Train
D212A	1	0.980559	1	Train
R353C	1	0.972796	1	Train
W269S	1	0.986009	1	Train
D282E	1	0.96129	1	Train
A306T	1	0.957411	1	Train
T276P	1	0.97437	1	Train
A501P	0	0.0171876	1	Train
F261C	1	0.957416	1	Train
I568T	1	0.984475	1	Train
R213Q	1	0.9638	1	Train
T359K	1	0.985718	1	Train
L245P	1	0.994913	1	Train
S195F	1	0.978552	1	Train
N350I	1	0.981336	1	Train
I205V	1	0.972215	1	Train
E140Q	0	0.296034	1	Train
P335A	1	0.988675	1	Train
G301V	1	0.996203	1	Train
H228Q	1	0.977572	1	Train
G256W	1	0.922809	1	Train
I340N	1	0.970446	1	Train
V182M	1	0.944408	1	Train
G256V	1	0.957409	1	Train
Y154D	1	0.959885	1	Train
Y363C	1	0.978084	1	Train
K283R	1	0.972807	1	Train
A337T	1	0.983392	1	Train
R325G	1	0.98716	1	Train
I592M	1	0.811064	1	Train
G189V	1	0.96009	1	Train
G313R	1	0.991567	1	Train
L206R	1	0.975696	1	Train
D266E	1	0.982479	1	Train
T114A	1	0.957424	1	Train
L292P	1	0.964335	1	Train
M1K	1	0.957375	1	Train
G215R	1	0.976242	1	Train
D355G	1	0.970797	1	Train
N258I	1	0.967444	1	Train
F305L	1	0.981056	1	Train
L356R	1	0.967755	1	Train
L356V	1	0.94769	1	Train
H96P	1	0.957339	1	Train
L268P	1	0.982474	1	Train
T296P	1	0.94669	1	Train
R213L	1	0.961529	1	Train
A265P	1	0.960477	1	Train
S122L	1	0.988909	1	Train
L197P	1	0.957396	1	Train
N258S	1	0.635339	1	Train
W218R	1	0.978734	1	Train
T277A	1	0.964115	1	Train
R560W	1	0.961026	1	Train
G239R	1	0.94048	1	Train
T857I	0	0.000984974	0	Train
R604H	0	0.000826938	0	Train
R854C	0	0.00250695	0	Train
P848L	0	0.000204842	0	Train
A703V	0	0.00348807	0	Train
F527I	0	0.00156456	0	Train
P29S	0	8.90328e-05	0	Train
P370L	0	0.00320058	0	Train
D675E	0	0.000106843	0	Train
V367I	0	0.00604696	0	Train
A611T	0	0.02032	0	Train
R489G	0	0.0203659	0	Train
A64S	0	0.00301067	0	Train
P652R	0	6.80296e-05	0	Train
D470N	0	0.00187601	0	Train
A754T	0	0.00361709	0	Train
V690M	0	1.71724e-05	0	Train
R782Q	0	0.000318036	0	Train
P617S	1	0.743378	0	Train
V793L	0	0.00689217	0	Train
P651R	0	8.08623e-05	0	Train
A707T	0	0.0113965	0	Train
A502V	0	0.0203644	0	Train
V139M	1	0.593162	0	Train
E515D	0	0.000543573	0	Train
V593M	1	0.554088	0	Train
I689L	0	1.07693e-05	0	Train
A657T	0	0.00874878	0	Train
A404T	0	0.020356	0	Train
G30S	0	0.000209827	0	Train
H795N	0	0.0321218	0	Train
G858S	0	1.21108e-05	0	Train
G624R	0	0.0270206	0	Train
R725C	0	0.00266716	0	Train
P668L	0	0.000680291	0	Train
P411L	0	0.000936584	0	Train
R760H	0	1.54875e-05	0	Train
P652L	0	0.000128113	0	Train
A822T	0	0.0205124	0	Train
A62V	0	0.00351568	0	Train
G697S	0	2.83339e-05	0	Train
T605S	0	3.29924e-05	0	Train
P424S	0	0.0168737	0	Train
Y755C	0	1.56417e-05	0	Train
P777R	0	3.22949e-05	0	Train
D520G	0	0.00195191	0	Train
Y658C	0	5.03454e-05	0	Train
P724L	0	0.000294719	0	Train
P664L	0	5.11472e-05	0	Train
I517V	0	0.000376579	0	Train
I177V	0	0.105032	0	Train
F659S	0	0.000119118	0	Train
N780T	0	1.19975e-05	0	Train
I686V	0	4.48089e-05	0	Train
P410L	0	0.000822286	0	Train
C849F	0	0.0203452	0	Train
P772R	0	3.89375e-05	0	Train
R767Q	0	0.00209133	0	Train
G8S	0	0.000643301	0	Train
T696M	0	0.00109914	0	Train
R647Q	0	0.000319618	0	Train
E778K	0	1.28563e-05	0	Train
Q3E	0	0.0550411	0	Train
G8R	0	0.00306084	0	Train
G16E	0	0.000758886	0	Train
L20V	0	0.00235727	0	Train
V25M	0	0.00240593	0	Train
G26E	0	0.00136009	0	Train
G30A	0	0.0203436	0	Train
S34F	0	0.0973593	0	Train
T35S	0	0.00142668	0	Train
I53T	0	0.0231662	0	Train
P57S	0	0.000545731	0	Train
R58C	0	0.00987479	0	Train
G60A	0	0.0042687	0	Train
P67S	0	8.33839e-05	0	Train
P67A	0	0.000140608	0	Train
R75H	0	0.0623905	0	Train
Q78K	0	0.273551	0	Train
W91G	1	0.643243	0	Train
V108M	1	0.829883	0	Train
K116R	0	0.0139168	0	Train
E117D	0	0.0311089	0	Train
E117G	0	0.0203336	0	Train
F142L	0	0.0718396	0	Train
V143L	0	0.227811	0	Train
R160Q	1	0.738088	0	Train
K162R	0	0.383134	0	Train
R165W	1	0.78517	0	Train
P167L	0	0.28086	0	Train
L176V	0	0.160272	0	Train
V225I	1	0.929101	0	Train
G256E	1	0.637692	0	Train
D259H	0	0.279591	0	Train
D259N	0	0.285701	0	Train
A295S	1	0.726036	0	Train
H357R	1	0.903161	0	Train
R365Q	1	0.445891	0	Train
V367A	0	0.0079564	0	Train
T368N	0	0.00171503	0	Train
V369M	0	0.00199875	0	Train
M371V	0	0.00144116	0	Train
Q375E	0	0.00054173	0	Train
G380A	0	0.019023	0	Train
G380R	0	0.0101972	0	Train
I385L	0	0.00458672	0	Train
P387R	0	0.0139977	0	Train
S399G	0	0.0203935	0	Train
L403F	0	0.0203547	0	Train
D408E	0	0.000491444	0	Train
D408V	0	0.0203757	0	Train
P411Q	0	0.000554302	0	Train
P413L	0	0.00463286	0	Train
G418A	0	0.0167184	0	Train
P420L	0	0.00843461	0	Train
P424L	0	0.0203406	0	Train
G431R	0	0.00814047	0	Train
R432H	0	0.00134713	0	Train
Q435R	0	0.00193659	0	Train
D441G	0	0.0018224	0	Train
R442C	0	0.0489661	0	Train
A451V	0	0.00834171	0	Train
S457F	0	0.0139273	0	Train
Q461P	0	0.00675197	0	Train
R465Q	0	0.0180674	0	Train
R465W	0	0.0282764	0	Train
A469T	0	0.0248283	0	Train
E474K	0	0.00700738	0	Train
S478G	0	0.0375078	0	Train
R489H	0	0.00263083	0	Train
R493H	0	0.00207864	0	Train
R497C	0	0.0115277	0	Train
I498L	0	0.000423561	0	Train
K499R	0	0.000734697	0	Train
A502T	0	0.0203645	0	Train
R504Q	0	0.015897	0	Train
E509A	0	0.0180675	0	Train
G514R	0	0.00246031	0	Train
S522N	0	0.00478268	0	Train
C523Y	0	0.0245307	0	Train
C525S	0	0.00628494	0	Train
E526Q	0	0.00144387	0	Train
L532P	0	0.0203622	0	Train
K537R	1	0.435567	0	Train
V538I	0	0.304298	0	Train
V543M	1	0.477736	0	Train
V545I	0	0.117686	0	Train
V564L	1	0.653945	0	Train
A598V	0	0.0141544	0	Train
T600M	0	0.00996161	0	Train
D601N	0	0.000718942	0	Train
T605I	0	0.00570091	0	Train
P608L	0	0.000693457	0	Train
A611V	0	0.0175666	0	Train
R622W	1	0.679729	0	Train
G624W	1	0.5	0	Train
M633T	0	0.0203943	0	Train
M633V	0	0.0110516	0	Train
E634Q	0	0.0026435	0	Train
K635N	0	0.0225855	0	Train
L640M	0	0.0156181	0	Train
Q646R	0	7.52147e-05	0	Train
R647W	0	0.0203897	0	Train
G649V	0	0.00358111	0	Train
G649A	0	0.0026144	0	Train
E654V	0	0.0209167	0	Train
E656D	0	1.47738e-05	0	Train
E656K	0	1.56337e-05	0	Train
G660R	0	0.000184384	0	Train
G660V	0	0.00537951	0	Train
E663G	0	2.44404e-05	0	Train
P664T	0	9.68475e-06	0	Train
P666L	0	8.78772e-05	0	Train
P666Q	0	2.77195e-05	0	Train
A667V	0	0.0132605	0	Train
R677Q	0	0.000602756	0	Train
R677W	0	0.0174383	0	Train
V680G	0	0.00319166	0	Train
H683R	0	7.49412e-05	0	Train
G684S	0	3.78422e-05	0	Train
I689F	0	0.00962472	0	Train
R691C	0	0.00211783	0	Train
S694T	0	7.23007e-05	0	Train
N700K	0	6.96845e-05	0	Train
S702L	0	0.00114957	0	Train
P704L	0	3.60126e-05	0	Train
P705L	0	4.97821e-05	0	Train
A706D	0	0.0121336	0	Train
A707V	0	0.0101326	0	Train
P713A	0	0.00929867	0	Train
P714H	0	0.0214825	0	Train
P724S	0	7.87245e-05	0	Train
G727S	0	2.01003e-05	0	Train
T730A	0	0.0040881	0	Train
S731A	0	0.0193765	0	Train
P732S	0	0.000198129	0	Train
R741L	0	0.0419009	0	Train
P743L	0	0.00200964	0	Train
P745L	0	0.00462956	0	Train
H748Q	0	0.00566839	0	Train
R760C	0	0.00188507	0	Train
R767W	0	0.0203697	0	Train
Q768R	0	0.000952044	0	Train
P772A	0	2.42534e-05	0	Train
P777S	0	1.2753e-05	0	Train
E778V	0	0.0020642	0	Train
G779R	0	6.77629e-05	0	Train
L781P	0	0.00010437	0	Train
R782W	0	0.0144814	0	Train
S789T	0	0.0267082	0	Train
E796K	0	0.019841	0	Train
K811R	0	0.00231201	0	Train
D815E	0	0.0196293	0	Train
A822V	0	0.0173004	0	Train
K829E	0	0.0016245	0	Train
A835V	0	0.0462567	0	Train
E838G	0	0.0157282	0	Train
C846R	0	0.0512071	0	Train
G850R	0	6.06524e-05	0	Train
P852L	0	5.266e-05	0	Train
R854H	0	1.73563e-05	0	Train
S855L	0	0.00068596	0	Train
T857A	0	0.000579402	0	Train
V865M	0	0.00486629	0	Train
V865G	0	0.016045	0	Train
G869E	0	0.000182794	0	Train
R871S	0	0.000524899	0	Train
R871G	0	0.000597616	0	Train
G290S	1	0.973928	1	Test
R581G	1	0.980581	1	Test
S303C	1	0.97381	1	Test
S247L	1	0.999996	1	Test
A253S	1	0.979805	1	Test
D563G	1	0.871146	1	Test
L241P	1	0.986661	1	Test
V135M	1	0.706442	0	Test
L339Q	1	0.973031	1	Test
T359A	1	0.996561	1	Test
S374L	0	0.00608575	0	Test
P458S	0	0.000690644	0	Test
P708A	0	4.70739e-05	0	Test
M1T	1	0.962072	1	Test
A337G	1	0.983502	1	Test
D212E	1	0.972668	1	Test
G737S	0	0.00014696	0	Test
A828V	0	0.0562589	0	Test
D675N	0	0.000106843	0	Test
R432C	0	0.0254123	0	Test
D212G	1	0.965743	1	Test
A611S	0	0.020771	0	Test
E254A	1	0.99616	1	Test
T771I	0	0.00340961	0	Test
R210H	1	0.970994	1	Test
G315R	1	0.99265	1	Test
N396S	0	0.0303668	0	Test
V143M	0	0.382819	0	Test
A306P	1	0.959389	1	Test
G756S	0	7.87395e-06	0	Test
T276I	1	0.963778	1	Test
G574D	1	0.99428	1	Test
Y280H	1	0.961353	1	Test
V103D	1	0.988047	1	Test
S358F	1	0.983103	1	Test
Q188P	1	0.958669	1	Test
L293P	1	0.904227	1	Test
Y284D	1	0.973395	1	Test
R210C	1	0.958836	1	Test
Y154H	1	0.955713	1	Test
V450M	0	0.000530584	0	Test
W270R	1	0.987412	1	Test
P308S	1	0.913366	1	Test
A761S	0	0.0047539	0	Test
Y237C	1	0.94421	1	Test
R333W	1	0.97585	1	Test
G281R	1	0.95956	1	Test
F261S	1	0.974733	1	Test
K327M	1	0.988665	1	Test
D282N	1	0.96129	1	Test
T194P	1	0.952938	1	Test
F496I	0	0.00139249	0	Test
R581Q	1	0.978275	1	Test
G159E	1	0.923077	1	Test
R332G	1	0.988382	1	Test
A495P	0	0.0184848	0	Test
S751L	0	0.0692142	0	Test
S187Y	1	0.897842	1	Test
T274M	1	0.9787	1	Test
D563E	1	0.880243	1	Test
V567D	1	0.973683	1	Test
T277I	1	0.961707	1	Test
Y237F	1	0.944738	1	Test
R691H	0	1.99218e-05	0	Test
P772L	0	6.71485e-05	0	Test
M578V	1	0.996373	1	Test
H228Y	1	0.970725	1	Test
L339R	1	0.974678	1	Test
P776H	0	2.39293e-05	0	Test
A306V	1	0.949956	1	Test
F261I	1	0.950984	1	Test
A43V	0	0.179625	0	Test
R198Q	1	0.953068	1	Test
A97V	1	0.665857	0	Test
R581L	1	0.977359	1	Test
G869R	0	0.000344911	0	Test
R353H	1	0.939288	1	Test
G315E	1	0.991293	1	Test
L107F	1	0.867343	1	Test
A309V	1	0.903871	1	Test
D355E	1	0.966943	1	Test
H228R	1	0.995674	1	Test
G418V	0	0.0190809	0	Test
R604C	0	0.0171681	0	Test
R504W	0	0.0273514	1	Test
R800H	0	0.0984254	0	Test
H96N	1	0.690018	1	Test
R560Q	1	0.974095	1	Test
G279C	1	0.9566	1	Test

## Sheet: Light GBM
Variant	Prediction	Score	Label	Group
G310S	1	0.985491	1	Train
A253T	1	0.995111	1	Train
L243F	1	0.994602	1	Train
R547W	1	0.83569	1	Train
L268F	1	0.994602	1	Train
D282Y	1	0.995621	1	Train
R201C	1	0.990524	1	Train
R207W	1	0.99457	1	Train
P88L	1	0.965762	1	Train
M208V	1	0.993515	1	Train
P335R	1	0.991957	1	Train
Y284H	1	0.99389	1	Train
N79K	1	0.790335	1	Train
Y264N	1	0.994636	1	Train
L81P	1	0.935547	1	Train
R333Q	1	0.981639	1	Train
G159R	1	0.988513	1	Train
A193D	1	0.986492	1	Train
R553Q	1	0.982763	1	Train
M546V	1	0.767103	1	Train
R144Q	1	0.802786	1	Train
G301S	1	0.987982	1	Train
R553L	1	0.993451	1	Train
T263I	1	0.995621	1	Train
G301D	1	0.975977	1	Train
R201H	1	0.987925	1	Train
T276N	1	0.9891	1	Train
K552T	1	0.990304	1	Train
A294V	1	0.980508	1	Train
S223P	1	0.992283	1	Train
R553W	1	0.993451	1	Train
P561S	1	0.989685	1	Train
N190S	1	0.984425	1	Train
L161P	1	0.847106	1	Train
F555L	1	0.989558	1	Train
R210P	1	0.99457	1	Train
A294G	1	0.880524	1	Train
G279S	1	0.966165	1	Train
E130K	1	0.99413	1	Train
T234I	1	0.995621	1	Train
W269C	1	0.994688	1	Train
C169R	1	0.987601	1	Train
K319T	1	0.993584	1	Train
R207Q	1	0.991889	1	Train
T114I	1	0.735283	1	Train
A343G	1	0.980612	1	Train
S113F	1	0.991991	1	Train
V320I	1	0.942889	1	Train
T287A	1	0.995621	1	Train
T277S	1	0.974304	1	Train
A265V	1	0.994688	1	Train
L200P	1	0.990996	1	Train
T287N	1	0.995111	1	Train
A185T	1	0.994598	1	Train
D212Y	1	0.99457	1	Train
V589G	1	0.900502	1	Train
P285T	1	0.994206	1	Train
D566H	1	0.941267	1	Train
R213W	1	0.994057	1	Train
S314T	1	0.994515	1	Train
Q341H	1	0.977349	1	Train
D282V	1	0.995621	1	Train
R214W	1	0.994057	1	Train
E119G	1	0.952173	1	Train
V224A	1	0.896686	1	Train
S352P	1	0.97419	1	Train
C242G	1	0.99472	1	Train
I582F	1	0.995382	1	Train
R144W	1	0.924066	1	Train
A348T	1	0.983449	1	Train
K583N	1	0.99472	1	Train
Y363H	1	0.970315	1	Train
M578I	1	0.995455	1	Train
T234P	1	0.995194	1	Train
A246P	1	0.995331	1	Train
R395G	1	0.98297	1	Train
G271V	1	0.994831	1	Train
P308L	1	0.995292	1	Train
I311M	1	0.99423	1	Train
P561L	1	0.993845	1	Train
A265G	1	0.994138	1	Train
H260Y	1	0.991951	1	Train
M565T	1	0.664379	1	Train
L351F	1	0.976194	1	Train
L637R	1	0.816339	1	Train
G216V	1	0.99457	1	Train
G256R	1	0.863653	1	Train
N190I	1	0.987911	1	Train
W344R	1	0.989694	1	Train
R214Q	1	0.990363	1	Train
R353G	1	0.987423	1	Train
E231Q	1	0.994515	1	Train
M1I	1	0.941974	1	Train
I278T	1	0.980841	1	Train
L356Q	1	0.989291	1	Train
Y362C	1	0.990857	1	Train
A196V	1	0.99083	1	Train
Q204R	1	0.988604	1	Train
I340M	1	0.990215	1	Train
I340T	1	0.990453	1	Train
L351V	1	0.962942	1	Train
D282H	1	0.994515	1	Train
Q204H	1	0.989601	1	Train
A265T	1	0.99423	1	Train
H324R	1	0.991286	1	Train
M546T	1	0.770261	1	Train
R332K	1	0.976939	1	Train
V132M	1	0.860214	1	Train
E231G	1	0.9955	1	Train
R588S	1	0.973462	1	Train
S195P	1	0.975477	1	Train
L243V	1	0.992577	1	Train
V250L	1	0.951963	1	Train
E231D	1	0.994771	1	Train
G290V	1	0.993887	1	Train
S229I	1	0.995621	1	Train
N350H	1	0.969307	1	Train
M1V	1	0.917783	1	Train
W269L	1	0.994688	1	Train
G315A	1	0.995621	1	Train
F304S	1	0.995331	1	Train
Q188K	1	0.987511	1	Train
S247W	1	0.994327	1	Train
R291S	1	0.9955	1	Train
I209T	1	0.994437	1	Train
D488E	0	0.128985	1	Train
G281W	1	0.988303	1	Train
F104S	1	0.988513	1	Train
R541G	1	0.97974	1	Train
V250G	1	0.982527	1	Train
K554N	1	0.967243	1	Train
Y284C	1	0.995006	1	Train
D259Y	1	0.736637	1	Train
R291G	1	0.9955	1	Train
G290D	1	0.988382	1	Train
L203P	1	0.992677	1	Train
P561R	1	0.993571	1	Train
I273N	1	0.993221	1	Train
A235V	1	0.9955	1	Train
K556E	1	0.99035	1	Train
P285S	1	0.993709	1	Train
G271D	1	0.99423	1	Train
T716I	1	0.961867	1	Train
T234A	1	0.995621	1	Train
D563Y	1	0.988076	1	Train
G222D	1	0.995578	1	Train
T217A	1	0.99457	1	Train
P285H	1	0.995033	1	Train
P335L	1	0.992419	1	Train
D563N	1	0.952902	1	Train
V175L	0	0.327038	1	Train
D212A	1	0.99457	1	Train
R353C	1	0.987423	1	Train
W269S	1	0.993299	1	Train
D282E	1	0.994515	1	Train
A306T	1	0.965886	1	Train
T276P	1	0.986661	1	Train
A501P	0	0.311972	1	Train
F261C	1	0.990982	1	Train
I568T	1	0.993059	1	Train
R213Q	1	0.990363	1	Train
T359K	1	0.990451	1	Train
L245P	1	0.994489	1	Train
S195F	1	0.988441	1	Train
N350I	1	0.991509	1	Train
I205V	1	0.990505	1	Train
E140Q	1	0.723161	1	Train
P335A	1	0.992419	1	Train
G301V	1	0.991378	1	Train
H228Q	1	0.995061	1	Train
G256W	1	0.898512	1	Train
I340N	1	0.990453	1	Train
V182M	1	0.81893	1	Train
G256V	1	0.971198	1	Train
Y154D	1	0.972556	1	Train
Y363C	1	0.987459	1	Train
K283R	1	0.99495	1	Train
A337T	1	0.99336	1	Train
R325G	1	0.993905	1	Train
I592M	1	0.983089	1	Train
G189V	1	0.992427	1	Train
G313R	1	0.995014	1	Train
L206R	1	0.994848	1	Train
D266E	1	0.993527	1	Train
T114A	1	0.735283	1	Train
L292P	1	0.928688	1	Train
M1K	1	0.860535	1	Train
G215R	1	0.994437	1	Train
D355G	1	0.988422	1	Train
N258I	1	0.883173	1	Train
F305L	1	0.994206	1	Train
L356R	1	0.989291	1	Train
L356V	1	0.974353	1	Train
H96P	1	0.985044	1	Train
L268P	1	0.994489	1	Train
T296P	1	0.872276	1	Train
R213L	1	0.994057	1	Train
A265P	1	0.994489	1	Train
S122L	1	0.968651	1	Train
L197P	1	0.88923	1	Train
N258S	1	0.810084	1	Train
W218R	1	0.994437	1	Train
T277A	1	0.992682	1	Train
R560W	1	0.994019	1	Train
G239R	1	0.990427	1	Train
T857I	0	0.00589817	0	Train
R604H	0	0.00860648	0	Train
R854C	0	0.00555667	0	Train
P848L	0	0.00555667	0	Train
A703V	0	0.00521853	0	Train
F527I	0	0.0133131	0	Train
P29S	0	0.00489028	0	Train
P370L	0	0.0254026	0	Train
D675E	0	0.00523679	0	Train
V367I	0	0.0120538	0	Train
A611T	0	0.00823242	0	Train
R489G	0	0.0356861	0	Train
A64S	0	0.00389429	0	Train
P652R	0	0.00410874	0	Train
D470N	0	0.0157533	0	Train
A754T	0	0.00521853	0	Train
V690M	0	0.00651633	0	Train
R782Q	0	0.00521853	0	Train
P617S	0	0.0999511	0	Train
V793L	0	0.00744505	0	Train
P651R	0	0.00410874	0	Train
A707T	0	0.00521853	0	Train
A502V	0	0.0348687	0	Train
V139M	0	0.239132	0	Train
E515D	0	0.0141106	0	Train
V593M	0	0.0474481	0	Train
I689L	0	0.00569892	0	Train
A657T	0	0.00584498	0	Train
A404T	0	0.0149289	0	Train
G30S	0	0.00523679	0	Train
H795N	0	0.0253492	0	Train
G858S	0	0.00521853	0	Train
G624R	0	0.0295714	0	Train
R725C	0	0.0092488	0	Train
P668L	0	0.0265179	0	Train
P411L	0	0.0136943	0	Train
R760H	0	0.00521853	0	Train
P652L	0	0.00622345	0	Train
A822T	0	0.0171148	0	Train
A62V	0	0.00521853	0	Train
G697S	0	0.00521853	0	Train
T605S	0	0.00369545	0	Train
P424S	0	0.00959955	0	Train
Y755C	0	0.00948468	0	Train
P777R	0	0.00410874	0	Train
D520G	0	0.0171889	0	Train
Y658C	0	0.00638267	0	Train
P724L	0	0.0055761	0	Train
P664L	0	0.00622345	0	Train
I517V	0	0.00957658	0	Train
I177V	0	0.130804	0	Train
F659S	0	0.0243005	0	Train
N780T	0	0.00555667	0	Train
I686V	0	0.00489028	0	Train
P410L	0	0.0136943	0	Train
C849F	0	0.00589817	0	Train
P772R	0	0.00577095	0	Train
R767Q	0	0.00523679	0	Train
G8S	0	0.0110796	0	Train
T696M	0	0.00589817	0	Train
R647Q	0	0.00584498	0	Train
E778K	0	0.00555667	0	Train
Q3E	0	0.0118056	0	Train
G8R	0	0.037093	0	Train
G16E	0	0.00534317	0	Train
L20V	0	0.0117859	0	Train
V25M	0	0.00941588	0	Train
G26E	0	0.00704237	0	Train
G30A	0	0.00591879	0	Train
S34F	0	0.0340009	0	Train
T35S	0	0.0121508	0	Train
I53T	0	0.0509256	0	Train
P57S	0	0.0037084	0	Train
R58C	0	0.0055761	0	Train
G60A	0	0.00591879	0	Train
P67S	0	0.0037084	0	Train
P67A	0	0.0037084	0	Train
R75H	0	0.0245073	0	Train
Q78K	0	0.209629	0	Train
W91G	0	0.27741	0	Train
V108M	1	0.527135	0	Train
K116R	0	0.0130924	0	Train
E117D	0	0.026474	0	Train
E117G	0	0.0396004	0	Train
F142L	0	0.170966	0	Train
V143L	0	0.174758	0	Train
R160Q	0	0.37961	0	Train
K162R	0	0.213221	0	Train
R165W	0	0.227127	0	Train
P167L	0	0.216827	0	Train
L176V	0	0.158811	0	Train
V225I	1	0.603606	0	Train
G256E	0	0.404913	0	Train
D259H	0	0.248652	0	Train
D259N	0	0.248652	0	Train
A295S	0	0.130639	0	Train
H357R	0	0.357296	0	Train
R365Q	0	0.0288381	0	Train
V367A	0	0.0180377	0	Train
T368N	0	0.0356754	0	Train
V369M	0	0.021197	0	Train
M371V	0	0.0250207	0	Train
Q375E	0	0.0146567	0	Train
G380A	0	0.0171904	0	Train
G380R	0	0.033534	0	Train
I385L	0	0.0403752	0	Train
P387R	0	0.0408734	0	Train
S399G	0	0.114354	0	Train
L403F	0	0.0305056	0	Train
D408E	0	0.0246938	0	Train
D408V	0	0.0224246	0	Train
P411Q	0	0.00957658	0	Train
P413L	0	0.0137418	0	Train
G418A	0	0.0135446	0	Train
P420L	0	0.0135433	0	Train
P424L	0	0.0236127	0	Train
G431R	0	0.0876775	0	Train
R432H	0	0.0211167	0	Train
Q435R	0	0.0139501	0	Train
D441G	0	0.0213293	0	Train
R442C	0	0.0230033	0	Train
A451V	0	0.0134965	0	Train
S457F	0	0.0185332	0	Train
Q461P	0	0.0224246	0	Train
R465Q	0	0.0166193	0	Train
R465W	0	0.0203679	0	Train
A469T	0	0.0219435	0	Train
E474K	0	0.0303504	0	Train
S478G	0	0.0639429	0	Train
R489H	0	0.0253379	0	Train
R493H	0	0.0181983	0	Train
R497C	0	0.0236638	0	Train
I498L	0	0.0164697	0	Train
K499R	0	0.0743273	0	Train
A502T	0	0.0383098	0	Train
R504Q	0	0.0418943	0	Train
E509A	0	0.0227999	0	Train
G514R	0	0.0871364	0	Train
S522N	0	0.0572321	0	Train
C523Y	0	0.0494446	0	Train
C525S	0	0.0282597	0	Train
E526Q	0	0.0131469	0	Train
L532P	0	0.119115	0	Train
K537R	0	0.109087	0	Train
V538I	0	0.0446646	0	Train
V543M	0	0.0596897	0	Train
V545I	0	0.0436223	0	Train
V564L	0	0.182729	0	Train
A598V	0	0.00586542	0	Train
T600M	0	0.00760326	0	Train
D601N	0	0.0101018	0	Train
T605I	0	0.00760326	0	Train
P608L	0	0.0055761	0	Train
A611V	0	0.00823242	0	Train
R622W	0	0.155383	0	Train
G624W	0	0.00969921	0	Train
M633T	0	0.0555966	0	Train
M633V	0	0.0589212	0	Train
E634Q	0	0.0126719	0	Train
K635N	0	0.0233446	0	Train
L640M	0	0.0147819	0	Train
Q646R	0	0.0223048	0	Train
R647W	0	0.00760326	0	Train
G649V	0	0.00760326	0	Train
G649A	0	0.00760326	0	Train
E654V	0	0.00760326	0	Train
E656D	0	0.00369545	0	Train
E656K	0	0.00622345	0	Train
G660R	0	0.0243005	0	Train
G660V	0	0.00760326	0	Train
E663G	0	0.00555667	0	Train
P664T	0	0.00638267	0	Train
P666L	0	0.00622345	0	Train
P666Q	0	0.00369545	0	Train
A667V	0	0.00584498	0	Train
R677Q	0	0.00523679	0	Train
R677W	0	0.00591879	0	Train
V680G	0	0.0105243	0	Train
H683R	0	0.00489028	0	Train
G684S	0	0.00523679	0	Train
I689F	0	0.00569892	0	Train
R691C	0	0.00555667	0	Train
S694T	0	0.00521853	0	Train
N700K	0	0.00569892	0	Train
S702L	0	0.00589817	0	Train
P704L	0	0.0083241	0	Train
P705L	0	0.0083241	0	Train
A706D	0	0.0103368	0	Train
A707V	0	0.00521853	0	Train
P713A	0	0.00794918	0	Train
P714H	0	0.00716763	0	Train
P724S	0	0.00489028	0	Train
G727S	0	0.00584498	0	Train
T730A	0	0.00460558	0	Train
S731A	0	0.0076298	0	Train
P732S	0	0.0037084	0	Train
R741L	0	0.0093009	0	Train
P743L	0	0.0062452	0	Train
P745L	0	0.0062452	0	Train
H748Q	0	0.00571885	0	Train
R760C	0	0.00555667	0	Train
R767W	0	0.00591879	0	Train
Q768R	0	0.00489028	0	Train
P772A	0	0.00519133	0	Train
P777S	0	0.00369545	0	Train
E778V	0	0.00589817	0	Train
G779R	0	0.0103368	0	Train
L781P	0	0.0103368	0	Train
R782W	0	0.00589817	0	Train
S789T	0	0.0160287	0	Train
E796K	0	0.0134058	0	Train
K811R	0	0.0104636	0	Train
D815E	0	0.0202506	0	Train
A822V	0	0.0134364	0	Train
K829E	0	0.00482538	0	Train
A835V	0	0.0134364	0	Train
E838G	0	0.0355161	0	Train
C846R	0	0.0275255	0	Train
G850R	0	0.0103368	0	Train
P852L	0	0.00622345	0	Train
R854H	0	0.00521853	0	Train
S855L	0	0.00589817	0	Train
T857A	0	0.00525555	0	Train
V865M	0	0.0140326	0	Train
V865G	0	0.0488625	0	Train
G869E	0	0.00600885	0	Train
R871S	0	0.00521853	0	Train
R871G	0	0.00521853	0	Train
G290S	1	0.992923	1	Test
R581G	1	0.995455	1	Test
S303C	1	0.995518	1	Test
S247L	1	0.994831	1	Test
A253S	1	0.995111	1	Test
D563G	1	0.982367	1	Test
L241P	1	0.994489	1	Test
V135M	0	0.332311	0	Test
L339Q	1	0.9922	1	Test
T359A	1	0.991115	1	Test
S374L	0	0.0211186	0	Test
P458S	0	0.00957658	0	Test
P708A	0	0.00494705	0	Test
M1T	1	0.558865	1	Test
A337G	1	0.992545	1	Test
D212E	1	0.990875	1	Test
G737S	0	0.00823242	0	Test
A828V	0	0.00666151	0	Test
D675N	0	0.0055761	0	Test
R432C	0	0.0211167	0	Test
D212G	1	0.993358	1	Test
A611S	0	0.00548936	0	Test
E254A	1	0.995621	1	Test
T771I	0	0.00589817	0	Test
R210H	1	0.989894	1	Test
G315R	1	0.995776	1	Test
N396S	0	0.167398	0	Test
V143M	0	0.22461	0	Test
A306P	1	0.975826	1	Test
G756S	0	0.00521853	0	Test
T276I	1	0.995437	1	Test
G574D	1	0.995534	1	Test
Y280H	1	0.991764	1	Test
V103D	1	0.951176	1	Test
S358F	1	0.991115	1	Test
Q188P	1	0.992173	1	Test
L293P	1	0.892108	1	Test
Y284D	1	0.99389	1	Test
R210C	1	0.993358	1	Test
Y154H	1	0.96898	1	Test
V450M	0	0.0149436	0	Test
W270R	1	0.994049	1	Test
P308S	1	0.992512	1	Test
A761S	0	0.00547022	0	Test
Y237C	1	0.989938	1	Test
R333W	1	0.988175	1	Test
G281R	1	0.982698	1	Test
F261S	1	0.993008	1	Test
K327M	1	0.994077	1	Test
D282N	1	0.994515	1	Test
T194P	1	0.983646	1	Test
F496I	0	0.0220628	0	Test
R581Q	1	0.99415	1	Test
G159E	1	0.973876	1	Test
R332G	1	0.987833	1	Test
A495P	0	0.123562	0	Test
S751L	0	0.00591879	0	Test
S187Y	1	0.993703	1	Test
T274M	1	0.994852	1	Test
D563E	1	0.946715	1	Test
V567D	1	0.943143	1	Test
T277I	1	0.993183	1	Test
Y237F	1	0.989909	1	Test
R691H	0	0.00521853	0	Test
P772L	0	0.0092488	0	Test
M578V	1	0.995455	1	Test
H228Y	1	0.995621	1	Test
L339R	1	0.9922	1	Test
P776H	0	0.00369545	0	Test
A306V	1	0.976303	1	Test
F261I	1	0.994642	1	Test
A43V	0	0.0355161	0	Test
R198Q	1	0.988484	1	Test
A97V	0	0.250507	0	Test
R581L	1	0.995578	1	Test
G869R	0	0.0119091	0	Test
R353H	1	0.978395	1	Test
G315E	1	0.995578	1	Test
L107F	1	0.948473	1	Test
A309V	1	0.971487	1	Test
D355E	1	0.974752	1	Test
H228R	1	0.994636	1	Test
G418V	0	0.0135446	0	Test
R604C	0	0.012992	0	Test
R504W	0	0.0507357	1	Test
R800H	0	0.0245073	0	Test
H96N	1	0.770713	1	Test
R560Q	1	0.991809	1	Test
G279C	1	0.989478	1	Test

## Sheet: Logistic Regression
Variant	Prediction	Score	Label	Group
G310S	1	0.97574	1	Train
A253T	1	0.995658	1	Train
L243F	1	0.999579	1	Train
R547W	1	0.842415	1	Train
L268F	1	0.999836	1	Train
D282Y	1	0.999959	1	Train
R201C	1	0.997786	1	Train
R207W	1	0.999532	1	Train
P88L	1	0.797896	1	Train
M208V	1	0.999762	1	Train
P335R	1	0.999912	1	Train
Y284H	1	0.999842	1	Train
N79K	1	0.769147	1	Train
Y264N	1	0.990833	1	Train
L81P	1	0.942942	1	Train
R333Q	1	0.99982	1	Train
G159R	1	0.952999	1	Train
A193D	1	0.917792	1	Train
R553Q	1	0.990144	1	Train
M546V	1	0.826241	1	Train
R144Q	1	0.77368	1	Train
G301S	1	0.994637	1	Train
R553L	1	0.995563	1	Train
T263I	1	0.999892	1	Train
G301D	1	0.959353	1	Train
R201H	1	0.809028	1	Train
T276N	1	0.999444	1	Train
K552T	1	0.977148	1	Train
A294V	1	0.815321	1	Train
S223P	1	0.996663	1	Train
R553W	1	0.992396	1	Train
P561S	1	0.994745	1	Train
N190S	1	0.988232	1	Train
L161P	1	0.901552	1	Train
F555L	1	0.999157	1	Train
R210P	1	0.999944	1	Train
A294G	1	0.602748	1	Train
G279S	1	0.999044	1	Train
E130K	1	0.973206	1	Train
T234I	1	0.999992	1	Train
W269C	1	0.999963	1	Train
C169R	1	0.996607	1	Train
K319T	1	0.99031	1	Train
R207Q	1	0.999392	1	Train
T114I	1	0.95235	1	Train
A343G	1	0.997985	1	Train
S113F	1	0.938284	1	Train
V320I	1	0.853073	1	Train
T287A	1	0.999953	1	Train
T277S	1	0.999938	1	Train
A265V	1	0.999835	1	Train
L200P	1	0.999644	1	Train
T287N	1	0.998082	1	Train
A185T	1	0.998651	1	Train
D212Y	1	0.999726	1	Train
V589G	1	0.824194	1	Train
P285T	1	0.999786	1	Train
D566H	1	0.738522	1	Train
R213W	1	0.99951	1	Train
S314T	1	0.991067	1	Train
Q341H	1	0.999577	1	Train
D282V	1	0.999972	1	Train
R214W	1	0.999506	1	Train
E119G	1	0.596961	1	Train
V224A	1	0.561961	1	Train
S352P	1	0.99166	1	Train
C242G	1	0.999722	1	Train
I582F	1	0.998781	1	Train
R144W	1	0.816202	1	Train
A348T	1	0.999839	1	Train
K583N	1	0.994063	1	Train
Y363H	1	0.987761	1	Train
M578I	1	0.999729	1	Train
T234P	1	0.999998	1	Train
A246P	1	0.999924	1	Train
R395G	1	0.67175	1	Train
G271V	1	0.999964	1	Train
P308L	1	0.938728	1	Train
I311M	1	0.991532	1	Train
P561L	1	0.988555	1	Train
A265G	1	0.999521	1	Train
H260Y	1	0.968897	1	Train
M565T	1	0.982016	1	Train
L351F	1	0.793308	1	Train
L637R	1	0.606413	1	Train
G216V	1	0.999659	1	Train
G256R	1	0.882883	1	Train
N190I	1	0.994786	1	Train
W344R	1	0.999971	1	Train
R214Q	1	0.999358	1	Train
R353G	1	0.878335	1	Train
E231Q	1	0.992224	1	Train
M1I	1	0.994436	1	Train
I278T	1	0.999512	1	Train
L356Q	1	0.996424	1	Train
Y362C	1	0.996285	1	Train
A196V	1	0.982138	1	Train
Q204R	1	0.999605	1	Train
I340M	1	0.999802	1	Train
I340T	1	0.999912	1	Train
L351V	1	0.912742	1	Train
D282H	1	0.999188	1	Train
Q204H	1	0.999306	1	Train
A265T	1	0.999891	1	Train
H324R	1	0.766379	1	Train
M546T	1	0.8776	1	Train
R332K	1	0.982907	1	Train
V132M	1	0.831492	1	Train
E231G	1	0.95901	1	Train
R588S	1	0.993696	1	Train
S195P	1	0.999094	1	Train
L243V	1	0.999845	1	Train
V250L	1	0.997265	1	Train
E231D	1	0.992494	1	Train
G290V	1	0.998242	1	Train
S229I	1	0.996435	1	Train
N350H	1	0.998239	1	Train
M1V	1	0.995909	1	Train
W269L	1	0.999966	1	Train
G315A	1	0.997122	1	Train
F304S	1	0.999049	1	Train
Q188K	1	0.998606	1	Train
S247W	1	0.999912	1	Train
R291S	1	0.994929	1	Train
I209T	1	0.99973	1	Train
D488E	0	0.0605286	1	Train
G281W	1	0.999798	1	Train
F104S	1	0.983008	1	Train
R541G	1	0.95525	1	Train
V250G	1	0.993769	1	Train
K554N	1	0.958124	1	Train
Y284C	1	0.999729	1	Train
D259Y	1	0.852204	1	Train
R291G	1	0.975102	1	Train
G290D	1	0.958934	1	Train
L203P	1	0.999771	1	Train
P561R	1	0.995913	1	Train
I273N	1	0.999553	1	Train
A235V	1	0.999256	1	Train
K556E	1	0.99952	1	Train
P285S	1	0.999813	1	Train
G271D	1	0.999118	1	Train
T716I	1	0.977492	1	Train
T234A	1	0.999996	1	Train
D563Y	1	0.988138	1	Train
G222D	1	0.800565	1	Train
T217A	1	0.999988	1	Train
P285H	1	0.999744	1	Train
P335L	1	0.999753	1	Train
D563N	1	0.823862	1	Train
V175L	0	0.128478	1	Train
D212A	1	0.99988	1	Train
R353C	1	0.939214	1	Train
W269S	1	0.999984	1	Train
D282E	1	0.999929	1	Train
A306T	1	0.992552	1	Train
T276P	1	0.999993	1	Train
A501P	0	0.00281926	1	Train
F261C	1	0.983991	1	Train
I568T	1	0.997878	1	Train
R213Q	1	0.999364	1	Train
T359K	1	0.999868	1	Train
L245P	1	0.999963	1	Train
S195F	1	0.991863	1	Train
N350I	1	0.999431	1	Train
I205V	1	0.999553	1	Train
E140Q	1	0.54281	1	Train
P335A	1	0.999877	1	Train
G301V	1	0.99826	1	Train
H228Q	1	0.994412	1	Train
G256W	1	0.892243	1	Train
I340N	1	0.999357	1	Train
V182M	1	0.749678	1	Train
G256V	1	0.947695	1	Train
Y154D	1	0.913491	1	Train
Y363C	1	0.979185	1	Train
K283R	1	0.972261	1	Train
A337T	1	0.999963	1	Train
R325G	1	0.974882	1	Train
I592M	1	0.955561	1	Train
G189V	1	0.997059	1	Train
G313R	1	0.986466	1	Train
L206R	1	0.999695	1	Train
D266E	1	0.999946	1	Train
T114A	1	0.977306	1	Train
L292P	1	0.997195	1	Train
M1K	1	0.998335	1	Train
G215R	1	0.999189	1	Train
D355G	1	0.963479	1	Train
N258I	1	0.918694	1	Train
F305L	1	0.997465	1	Train
L356R	1	0.996975	1	Train
L356V	1	0.993318	1	Train
H96P	1	0.991824	1	Train
L268P	1	0.999982	1	Train
T296P	1	0.996517	1	Train
R213L	1	0.999715	1	Train
A265P	1	0.99995	1	Train
S122L	1	0.983317	1	Train
L197P	1	0.996536	1	Train
N258S	1	0.832589	1	Train
W218R	1	0.999824	1	Train
T277A	1	0.999987	1	Train
R560W	1	0.998837	1	Train
G239R	1	0.996434	1	Train
T857I	0	7.64669e-06	0	Train
R604H	0	1.06175e-07	0	Train
R854C	0	3.09229e-08	0	Train
P848L	0	6.73245e-07	0	Train
A703V	0	1.11078e-07	0	Train
F527I	0	0.00113315	0	Train
P29S	0	0.000115328	0	Train
P370L	0	3.57328e-05	0	Train
D675E	0	0.00027393	0	Train
V367I	0	1.19479e-05	0	Train
A611T	0	3.41199e-05	0	Train
R489G	0	0.00536683	0	Train
A64S	0	7.32102e-07	0	Train
P652R	0	5.79628e-06	0	Train
D470N	0	0.00126023	0	Train
A754T	0	1.70031e-06	0	Train
V690M	0	1.12011e-08	0	Train
R782Q	0	8.15305e-06	0	Train
P617S	0	0.0996689	0	Train
V793L	0	0.000473056	0	Train
P651R	0	5.08742e-06	0	Train
A707T	0	3.61476e-09	0	Train
A502V	0	0.00151221	0	Train
V139M	0	0.09444	0	Train
E515D	0	9.59319e-05	0	Train
V593M	0	0.244693	0	Train
I689L	0	4.54386e-07	0	Train
A657T	0	9.47685e-07	0	Train
A404T	0	0.0215858	0	Train
G30S	0	0.000391319	0	Train
H795N	0	0.0021687	0	Train
G858S	0	2.33242e-06	0	Train
G624R	0	0.0130419	0	Train
R725C	0	1.62115e-06	0	Train
P668L	0	1.34518e-05	0	Train
P411L	0	4.10911e-05	0	Train
R760H	0	1.54161e-08	0	Train
P652L	0	2.05451e-06	0	Train
A822T	0	0.00137524	0	Train
A62V	0	5.38819e-06	0	Train
G697S	0	1.24067e-05	0	Train
T605S	0	5.66524e-05	0	Train
P424S	0	0.000447096	0	Train
Y755C	0	3.781e-07	0	Train
P777R	0	1.34751e-09	0	Train
D520G	0	0.00657873	0	Train
Y658C	0	1.31594e-07	0	Train
P724L	0	1.9717e-06	0	Train
P664L	0	2.80375e-07	0	Train
I517V	0	0.000288728	0	Train
I177V	0	0.319633	0	Train
F659S	0	1.05873e-05	0	Train
N780T	0	4.56406e-09	0	Train
I686V	0	1.77911e-05	0	Train
P410L	0	2.11082e-05	0	Train
C849F	0	1.8681e-06	0	Train
P772R	0	4.53572e-08	0	Train
R767Q	0	1.23677e-05	0	Train
G8S	0	0.00177816	0	Train
T696M	0	8.62429e-05	0	Train
R647Q	0	1.83115e-06	0	Train
E778K	0	2.10941e-10	0	Train
Q3E	0	0.0194425	0	Train
G8R	0	0.0022881	0	Train
G16E	0	6.32823e-05	0	Train
L20V	0	0.0132117	0	Train
V25M	0	5.41155e-05	0	Train
G26E	0	0.000182843	0	Train
G30A	0	0.00191273	0	Train
S34F	0	0.00554591	0	Train
T35S	0	0.0680538	0	Train
I53T	0	0.0242453	0	Train
P57S	0	0.000685308	0	Train
R58C	0	0.000121074	0	Train
G60A	0	0.000285794	0	Train
P67S	0	6.33715e-05	0	Train
P67A	0	5.82279e-05	0	Train
R75H	0	0.000875168	0	Train
Q78K	1	0.591455	0	Train
W91G	1	0.56879	0	Train
V108M	0	0.373309	0	Train
K116R	0	7.22459e-05	0	Train
E117D	0	0.0564835	0	Train
E117G	0	0.0104814	0	Train
F142L	0	0.227208	0	Train
V143L	0	0.0336862	0	Train
R160Q	1	0.904271	0	Train
K162R	0	0.00821403	0	Train
R165W	0	0.296059	0	Train
P167L	0	0.329592	0	Train
L176V	0	0.489182	0	Train
V225I	0	0.3385	0	Train
G256E	0	0.449565	0	Train
D259H	0	0.225872	0	Train
D259N	0	0.24457	0	Train
A295S	1	0.713169	0	Train
H357R	0	0.476602	0	Train
R365Q	0	0.0914091	0	Train
V367A	0	2.57435e-05	0	Train
T368N	0	5.56525e-05	0	Train
V369M	0	2.68817e-06	0	Train
M371V	0	0.000651228	0	Train
Q375E	0	1.52903e-05	0	Train
G380A	0	0.0030342	0	Train
G380R	0	0.000799759	0	Train
I385L	0	0.112539	0	Train
P387R	0	0.079904	0	Train
S399G	0	0.41562	0	Train
L403F	0	0.0559196	0	Train
D408E	0	0.00116851	0	Train
D408V	0	0.00291912	0	Train
P411Q	0	9.80164e-05	0	Train
P413L	0	0.00858743	0	Train
G418A	0	0.000177436	0	Train
P420L	0	3.52734e-06	0	Train
P424L	0	0.000204075	0	Train
G431R	0	8.87015e-07	0	Train
R432H	0	6.38272e-09	0	Train
Q435R	0	0.0259907	0	Train
D441G	0	0.00122529	0	Train
R442C	0	0.0199367	0	Train
A451V	0	0.000129763	0	Train
S457F	0	0.00193043	0	Train
Q461P	0	0.00264108	0	Train
R465Q	0	0.0263679	0	Train
R465W	0	0.0339848	0	Train
A469T	0	0.0160404	0	Train
E474K	0	0.0695396	0	Train
S478G	1	0.615376	0	Train
R489H	0	0.000108554	0	Train
R493H	0	1.32515e-05	0	Train
R497C	0	6.54373e-06	0	Train
I498L	0	1.85229e-05	0	Train
K499R	0	1.06758e-06	0	Train
A502T	0	0.00227843	0	Train
R504Q	0	0.006441	0	Train
E509A	0	0.0538091	0	Train
G514R	0	0.000668946	0	Train
S522N	0	0.00814768	0	Train
C523Y	0	0.29276	0	Train
C525S	0	0.00910115	0	Train
E526Q	0	0.000785432	0	Train
L532P	0	0.38217	0	Train
K537R	0	0.0269748	0	Train
V538I	0	0.231196	0	Train
V543M	0	0.291535	0	Train
V545I	0	0.0478864	0	Train
V564L	0	0.440002	0	Train
A598V	0	9.7043e-06	0	Train
T600M	0	0.000176198	0	Train
D601N	0	3.28114e-06	0	Train
T605I	0	0.000128703	0	Train
P608L	0	1.37665e-05	0	Train
A611V	0	2.26285e-05	0	Train
R622W	0	0.249382	0	Train
G624W	0	0.0143067	0	Train
M633T	0	0.0357862	0	Train
M633V	0	0.024023	0	Train
E634Q	0	0.00587184	0	Train
K635N	0	0.00163077	0	Train
L640M	0	0.0340077	0	Train
Q646R	0	1.0262e-05	0	Train
R647W	0	2.37873e-06	0	Train
G649V	0	6.73488e-06	0	Train
G649A	0	1.06549e-05	0	Train
E654V	0	7.72406e-05	0	Train
E656D	0	2.37417e-06	0	Train
E656K	0	4.45745e-07	0	Train
G660R	0	1.74942e-05	0	Train
G660V	0	4.20456e-05	0	Train
E663G	0	4.24416e-07	0	Train
P664T	0	5.38055e-07	0	Train
P666L	0	6.81737e-07	0	Train
P666Q	0	1.62627e-06	0	Train
A667V	0	4.80555e-06	0	Train
R677Q	0	2.58319e-05	0	Train
R677W	0	3.35562e-05	0	Train
V680G	0	3.61476e-07	0	Train
H683R	0	9.44635e-07	0	Train
G684S	0	3.43818e-05	0	Train
I689F	0	2.12192e-07	0	Train
R691C	0	4.41845e-07	0	Train
S694T	0	1.44818e-05	0	Train
N700K	0	6.89703e-05	0	Train
S702L	0	2.15401e-06	0	Train
P704L	0	7.93338e-09	0	Train
P705L	0	1.17893e-09	0	Train
A706D	0	2.51054e-10	0	Train
A707V	0	2.3973e-09	0	Train
P713A	0	0.00891342	0	Train
P714H	0	0.0132457	0	Train
P724S	0	4.32073e-06	0	Train
G727S	0	8.79144e-06	0	Train
T730A	0	0.00257238	0	Train
S731A	0	0.000709178	0	Train
P732S	0	0.000109469	0	Train
R741L	0	0.00070541	0	Train
P743L	0	0.000217406	0	Train
P745L	0	0.000699334	0	Train
H748Q	0	0.00277369	0	Train
R760C	0	1.63985e-06	0	Train
R767W	0	1.6066e-05	0	Train
Q768R	0	1.8389e-06	0	Train
P772A	0	3.2371e-08	0	Train
P777S	0	1.04666e-09	0	Train
E778V	0	3.08178e-09	0	Train
G779R	0	9.80783e-10	0	Train
L781P	0	5.27371e-07	0	Train
R782W	0	1.0591e-05	0	Train
S789T	0	0.0122347	0	Train
E796K	0	0.00558436	0	Train
K811R	0	2.92925e-05	0	Train
D815E	0	0.0907957	0	Train
A822V	0	0.000912481	0	Train
K829E	0	0.00291932	0	Train
A835V	0	0.00326364	0	Train
E838G	0	0.0143314	0	Train
C846R	0	0.00614268	0	Train
G850R	0	8.84105e-07	0	Train
P852L	0	5.64537e-07	0	Train
R854H	0	2.90704e-10	0	Train
S855L	0	1.39458e-07	0	Train
T857A	0	1.6476e-05	0	Train
V865M	0	0.00068987	0	Train
V865G	0	0.000352047	0	Train
G869E	0	1.0422e-05	0	Train
R871S	0	1.42021e-06	0	Train
R871G	0	2.83483e-07	0	Train
G290S	1	0.99458	1	Test
R581G	1	0.997031	1	Test
S303C	1	0.993435	1	Test
S247L	1	0.999949	1	Test
A253S	1	0.996196	1	Test
D563G	1	0.885793	1	Test
L241P	1	0.999871	1	Test
V135M	0	0.174123	0	Test
L339Q	1	0.99996	1	Test
T359A	1	0.999961	1	Test
S374L	0	0.000167299	0	Test
P458S	0	0.000246796	0	Test
P708A	0	2.52844e-07	0	Test
M1T	1	0.997283	1	Test
A337G	1	0.999839	1	Test
D212E	1	0.999525	1	Test
G737S	0	0.000296687	0	Test
A828V	0	0.00186859	0	Test
D675N	0	2.66749e-05	0	Test
R432C	0	6.78946e-07	0	Test
D212G	1	0.997062	1	Test
A611S	0	3.89614e-05	0	Test
E254A	1	0.998067	1	Test
T771I	0	1.94532e-06	0	Test
R210H	1	0.874159	1	Test
G315R	1	0.989144	1	Test
N396S	1	0.797456	0	Test
V143M	0	0.0290233	0	Test
A306P	1	0.996603	1	Test
G756S	0	3.06476e-07	0	Test
T276I	1	0.999971	1	Test
G574D	1	0.992857	1	Test
Y280H	1	0.99977	1	Test
V103D	0	0.370732	1	Test
S358F	1	0.996841	1	Test
Q188P	1	0.999806	1	Test
L293P	1	0.990486	1	Test
Y284D	1	0.999091	1	Test
R210C	1	0.998649	1	Test
Y154H	1	0.983823	1	Test
V450M	0	7.68385e-07	0	Test
W270R	1	0.999987	1	Test
P308S	1	0.971076	1	Test
A761S	0	1.05868e-05	0	Test
Y237C	1	0.996446	1	Test
R333W	1	0.999861	1	Test
G281R	1	0.999778	1	Test
F261S	1	0.993098	1	Test
K327M	1	0.996951	1	Test
D282N	1	0.999268	1	Test
T194P	1	0.999918	1	Test
F496I	0	2.42294e-05	0	Test
R581Q	1	0.999454	1	Test
G159E	1	0.687188	1	Test
R332G	1	0.999317	1	Test
A495P	0	0.000116702	0	Test
S751L	0	0.00359095	0	Test
S187Y	1	0.999101	1	Test
T274M	1	0.999992	1	Test
D563E	1	0.97961	1	Test
V567D	0	0.475012	1	Test
T277I	1	0.999973	1	Test
Y237F	1	0.996268	1	Test
R691H	0	4.15375e-09	0	Test
P772L	0	1.6077e-08	0	Test
M578V	1	0.999801	1	Test
H228Y	1	0.997155	1	Test
L339R	1	0.999966	1	Test
P776H	0	2.07382e-09	0	Test
A306V	1	0.988811	1	Test
F261I	1	0.983963	1	Test
A43V	0	0.0345767	0	Test
R198Q	1	0.996443	1	Test
A97V	1	0.669578	0	Test
R581L	1	0.999756	1	Test
G869R	0	9.61857e-05	0	Test
R353H	0	0.126833	1	Test
G315E	1	0.908015	1	Test
L107F	1	0.826887	1	Test
A309V	1	0.954278	1	Test
D355E	1	0.993918	1	Test
H228R	1	0.535573	1	Test
G418V	0	0.000112163	0	Test
R604C	0	1.1294e-05	0	Test
R504W	0	0.00835098	1	Test
R800H	0	0.000729693	0	Test
H96N	1	0.587052	1	Test
R560Q	1	0.99849	1	Test
G279C	1	0.997766	1	Test

## Sheet: K Nearest Neighbors
Variant	Prediction	Score	Label	Group
G310S	1	1	1	Train
A253T	1	1	1	Train
L243F	1	1	1	Train
R547W	1	1	1	Train
L268F	1	1	1	Train
D282Y	1	1	1	Train
R201C	1	1	1	Train
R207W	1	1	1	Train
P88L	1	1	1	Train
M208V	1	1	1	Train
P335R	1	1	1	Train
Y284H	1	1	1	Train
N79K	1	1	1	Train
Y264N	1	1	1	Train
L81P	1	1	1	Train
R333Q	1	1	1	Train
G159R	1	1	1	Train
A193D	1	1	1	Train
R553Q	1	1	1	Train
M546V	1	1	1	Train
R144Q	1	1	1	Train
G301S	1	1	1	Train
R553L	1	1	1	Train
T263I	1	1	1	Train
G301D	1	1	1	Train
R201H	1	1	1	Train
T276N	1	1	1	Train
K552T	1	1	1	Train
A294V	1	1	1	Train
S223P	1	1	1	Train
R553W	1	1	1	Train
P561S	1	1	1	Train
N190S	1	1	1	Train
L161P	1	1	1	Train
F555L	1	1	1	Train
R210P	1	1	1	Train
A294G	1	1	1	Train
G279S	1	1	1	Train
E130K	1	1	1	Train
T234I	1	1	1	Train
W269C	1	1	1	Train
C169R	1	1	1	Train
K319T	1	1	1	Train
R207Q	1	1	1	Train
T114I	1	1	1	Train
A343G	1	1	1	Train
S113F	1	1	1	Train
V320I	1	1	1	Train
T287A	1	1	1	Train
T277S	1	1	1	Train
A265V	1	1	1	Train
L200P	1	1	1	Train
T287N	1	1	1	Train
A185T	1	1	1	Train
D212Y	1	1	1	Train
V589G	1	1	1	Train
P285T	1	1	1	Train
D566H	1	1	1	Train
R213W	1	1	1	Train
S314T	1	1	1	Train
Q341H	1	1	1	Train
D282V	1	1	1	Train
R214W	1	1	1	Train
E119G	1	1	1	Train
V224A	1	1	1	Train
S352P	1	1	1	Train
C242G	1	1	1	Train
I582F	1	1	1	Train
R144W	1	1	1	Train
A348T	1	1	1	Train
K583N	1	1	1	Train
Y363H	1	1	1	Train
M578I	1	1	1	Train
T234P	1	1	1	Train
A246P	1	1	1	Train
R395G	1	1	1	Train
G271V	1	1	1	Train
P308L	1	1	1	Train
I311M	1	1	1	Train
P561L	1	1	1	Train
A265G	1	1	1	Train
H260Y	1	1	1	Train
M565T	1	1	1	Train
L351F	1	1	1	Train
L637R	1	1	1	Train
G216V	1	1	1	Train
G256R	1	1	1	Train
N190I	1	1	1	Train
W344R	1	1	1	Train
R214Q	1	1	1	Train
R353G	1	1	1	Train
E231Q	1	1	1	Train
M1I	1	1	1	Train
I278T	1	1	1	Train
L356Q	1	1	1	Train
Y362C	1	1	1	Train
A196V	1	1	1	Train
Q204R	1	1	1	Train
I340M	1	1	1	Train
I340T	1	1	1	Train
L351V	1	1	1	Train
D282H	1	1	1	Train
Q204H	1	1	1	Train
A265T	1	1	1	Train
H324R	1	1	1	Train
M546T	1	1	1	Train
R332K	1	1	1	Train
V132M	1	1	1	Train
E231G	1	1	1	Train
R588S	1	1	1	Train
S195P	1	1	1	Train
L243V	1	1	1	Train
V250L	1	1	1	Train
E231D	1	1	1	Train
G290V	1	1	1	Train
S229I	1	1	1	Train
N350H	1	1	1	Train
M1V	1	1	1	Train
W269L	1	1	1	Train
G315A	1	1	1	Train
F304S	1	1	1	Train
Q188K	1	1	1	Train
S247W	1	1	1	Train
R291S	1	1	1	Train
I209T	1	1	1	Train
D488E	1	1	1	Train
G281W	1	1	1	Train
F104S	1	1	1	Train
R541G	1	1	1	Train
V250G	1	1	1	Train
K554N	1	1	1	Train
Y284C	1	1	1	Train
D259Y	0	0.333333	1	Train
R291G	1	1	1	Train
G290D	1	1	1	Train
L203P	1	1	1	Train
P561R	1	1	1	Train
I273N	1	1	1	Train
A235V	1	1	1	Train
K556E	1	1	1	Train
P285S	1	1	1	Train
G271D	1	1	1	Train
T716I	1	1	1	Train
T234A	1	1	1	Train
D563Y	1	1	1	Train
G222D	1	1	1	Train
T217A	1	1	1	Train
P285H	1	1	1	Train
P335L	1	1	1	Train
D563N	1	1	1	Train
V175L	1	1	1	Train
D212A	1	1	1	Train
R353C	1	1	1	Train
W269S	1	1	1	Train
D282E	1	1	1	Train
A306T	1	1	1	Train
T276P	1	1	1	Train
A501P	1	1	1	Train
F261C	1	1	1	Train
I568T	1	1	1	Train
R213Q	1	1	1	Train
T359K	1	1	1	Train
L245P	1	1	1	Train
S195F	1	1	1	Train
N350I	1	1	1	Train
I205V	1	1	1	Train
E140Q	1	1	1	Train
P335A	1	1	1	Train
G301V	1	1	1	Train
H228Q	1	1	1	Train
G256W	1	1	1	Train
I340N	1	1	1	Train
V182M	1	1	1	Train
G256V	1	1	1	Train
Y154D	1	1	1	Train
Y363C	1	1	1	Train
K283R	1	1	1	Train
A337T	1	1	1	Train
R325G	1	1	1	Train
I592M	1	1	1	Train
G189V	1	1	1	Train
G313R	1	1	1	Train
L206R	1	1	1	Train
D266E	1	1	1	Train
T114A	1	1	1	Train
L292P	1	1	1	Train
M1K	1	1	1	Train
G215R	1	1	1	Train
D355G	1	1	1	Train
N258I	1	1	1	Train
F305L	1	1	1	Train
L356R	1	1	1	Train
L356V	1	1	1	Train
H96P	1	1	1	Train
L268P	1	1	1	Train
T296P	1	1	1	Train
R213L	1	1	1	Train
A265P	1	1	1	Train
S122L	1	1	1	Train
L197P	1	1	1	Train
N258S	1	1	1	Train
W218R	1	1	1	Train
T277A	1	1	1	Train
R560W	1	1	1	Train
G239R	1	1	1	Train
T857I	0	0	0	Train
R604H	0	0	0	Train
R854C	0	0	0	Train
P848L	0	0	0	Train
A703V	0	0	0	Train
F527I	0	0	0	Train
P29S	0	0	0	Train
P370L	0	0	0	Train
D675E	0	0	0	Train
V367I	0	0	0	Train
A611T	0	0	0	Train
R489G	0	0	0	Train
A64S	0	0	0	Train
P652R	0	0	0	Train
D470N	0	0	0	Train
A754T	0	0	0	Train
V690M	0	0	0	Train
R782Q	0	0	0	Train
P617S	0	0	0	Train
V793L	0	0	0	Train
P651R	0	0	0	Train
A707T	0	0	0	Train
A502V	0	0	0	Train
V139M	0	0	0	Train
E515D	0	0	0	Train
V593M	0	0	0	Train
I689L	0	0	0	Train
A657T	0	0	0	Train
A404T	0	0	0	Train
G30S	0	0	0	Train
H795N	0	0	0	Train
G858S	0	0	0	Train
G624R	0	0	0	Train
R725C	0	0	0	Train
P668L	0	0	0	Train
P411L	0	0	0	Train
R760H	0	0	0	Train
P652L	0	0	0	Train
A822T	0	0	0	Train
A62V	0	0	0	Train
G697S	0	0	0	Train
T605S	0	0	0	Train
P424S	0	0	0	Train
Y755C	0	0	0	Train
P777R	0	0	0	Train
D520G	0	0	0	Train
Y658C	0	0	0	Train
P724L	0	0	0	Train
P664L	0	0	0	Train
I517V	0	0	0	Train
I177V	0	0	0	Train
F659S	0	0	0	Train
N780T	0	0	0	Train
I686V	0	0	0	Train
P410L	0	0	0	Train
C849F	0	0	0	Train
P772R	0	0	0	Train
R767Q	0	0	0	Train
G8S	0	0	0	Train
T696M	0	0	0	Train
R647Q	0	0	0	Train
E778K	0	0	0	Train
Q3E	0	0	0	Train
G8R	0	0	0	Train
G16E	0	0	0	Train
L20V	0	0	0	Train
V25M	0	0	0	Train
G26E	0	0	0	Train
G30A	0	0	0	Train
S34F	0	0	0	Train
T35S	0	0	0	Train
I53T	0	0	0	Train
P57S	0	0	0	Train
R58C	0	0	0	Train
G60A	0	0	0	Train
P67S	0	0	0	Train
P67A	0	0	0	Train
R75H	0	0	0	Train
Q78K	0	0	0	Train
W91G	0	0	0	Train
V108M	0	0	0	Train
K116R	0	0	0	Train
E117D	0	0	0	Train
E117G	0	0	0	Train
F142L	0	0	0	Train
V143L	0	0	0	Train
R160Q	0	0	0	Train
K162R	0	0	0	Train
R165W	0	0	0	Train
P167L	0	0	0	Train
L176V	0	0	0	Train
V225I	0	0	0	Train
G256E	0	0	0	Train
D259H	0	0.333333	0	Train
D259N	0	0.333333	0	Train
A295S	0	0	0	Train
H357R	0	0	0	Train
R365Q	0	0	0	Train
V367A	0	0	0	Train
T368N	0	0	0	Train
V369M	0	0	0	Train
M371V	0	0	0	Train
Q375E	0	0	0	Train
G380A	0	0	0	Train
G380R	0	0	0	Train
I385L	0	0	0	Train
P387R	0	0	0	Train
S399G	0	0	0	Train
L403F	0	0	0	Train
D408E	0	0	0	Train
D408V	0	0	0	Train
P411Q	0	0	0	Train
P413L	0	0	0	Train
G418A	0	0	0	Train
P420L	0	0	0	Train
P424L	0	0	0	Train
G431R	0	0	0	Train
R432H	0	0	0	Train
Q435R	0	0	0	Train
D441G	0	0	0	Train
R442C	0	0	0	Train
A451V	0	0	0	Train
S457F	0	0	0	Train
Q461P	0	0	0	Train
R465Q	0	0	0	Train
R465W	0	0	0	Train
A469T	0	0	0	Train
E474K	0	0	0	Train
S478G	0	0	0	Train
R489H	0	0	0	Train
R493H	0	0	0	Train
R497C	0	0	0	Train
I498L	0	0	0	Train
K499R	0	0	0	Train
A502T	0	0	0	Train
R504Q	0	0	0	Train
E509A	0	0	0	Train
G514R	0	0	0	Train
S522N	0	0	0	Train
C523Y	0	0	0	Train
C525S	0	0	0	Train
E526Q	0	0	0	Train
L532P	0	0	0	Train
K537R	0	0	0	Train
V538I	0	0	0	Train
V543M	0	0	0	Train
V545I	0	0	0	Train
V564L	0	0	0	Train
A598V	0	0	0	Train
T600M	0	0	0	Train
D601N	0	0	0	Train
T605I	0	0	0	Train
P608L	0	0	0	Train
A611V	0	0	0	Train
R622W	0	0	0	Train
G624W	0	0	0	Train
M633T	0	0	0	Train
M633V	0	0	0	Train
E634Q	0	0	0	Train
K635N	0	0	0	Train
L640M	0	0	0	Train
Q646R	0	0	0	Train
R647W	0	0	0	Train
G649V	0	0	0	Train
G649A	0	0	0	Train
E654V	0	0	0	Train
E656D	0	0	0	Train
E656K	0	0	0	Train
G660R	0	0	0	Train
G660V	0	0	0	Train
E663G	0	0	0	Train
P664T	0	0	0	Train
P666L	0	0	0	Train
P666Q	0	0	0	Train
A667V	0	0	0	Train
R677Q	0	0	0	Train
R677W	0	0	0	Train
V680G	0	0	0	Train
H683R	0	0	0	Train
G684S	0	0	0	Train
I689F	0	0	0	Train
R691C	0	0	0	Train
S694T	0	0	0	Train
N700K	0	0	0	Train
S702L	0	0	0	Train
P704L	0	0	0	Train
P705L	0	0	0	Train
A706D	0	0	0	Train
A707V	0	0	0	Train
P713A	0	0	0	Train
P714H	0	0	0	Train
P724S	0	0	0	Train
G727S	0	0	0	Train
T730A	0	0	0	Train
S731A	0	0	0	Train
P732S	0	0	0	Train
R741L	0	0	0	Train
P743L	0	0	0	Train
P745L	0	0	0	Train
H748Q	0	0	0	Train
R760C	0	0	0	Train
R767W	0	0	0	Train
Q768R	0	0	0	Train
P772A	0	0	0	Train
P777S	0	0	0	Train
E778V	0	0	0	Train
G779R	0	0	0	Train
L781P	0	0	0	Train
R782W	0	0	0	Train
S789T	0	0	0	Train
E796K	0	0	0	Train
K811R	0	0	0	Train
D815E	0	0	0	Train
A822V	0	0	0	Train
K829E	0	0	0	Train
A835V	0	0	0	Train
E838G	0	0	0	Train
C846R	0	0	0	Train
G850R	0	0	0	Train
P852L	0	0	0	Train
R854H	0	0	0	Train
S855L	0	0	0	Train
T857A	0	0	0	Train
V865M	0	0	0	Train
V865G	0	0	0	Train
G869E	0	0	0	Train
R871S	0	0	0	Train
R871G	0	0	0	Train
G290S	1	1	1	Test
R581G	1	1	1	Test
S303C	1	1	1	Test
S247L	1	1	1	Test
A253S	1	1	1	Test
D563G	1	1	1	Test
L241P	1	1	1	Test
V135M	1	0.643712	0	Test
L339Q	1	1	1	Test
T359A	1	1	1	Test
S374L	0	0	0	Test
P458S	0	0	0	Test
P708A	0	0	0	Test
M1T	1	1	1	Test
A337G	1	1	1	Test
D212E	1	0.533861	1	Test
G737S	0	0	0	Test
A828V	0	0	0	Test
D675N	0	0	0	Test
R432C	0	0	0	Test
D212G	1	1	1	Test
A611S	0	0	0	Test
E254A	1	1	1	Test
T771I	0	0	0	Test
R210H	1	0.954803	1	Test
G315R	1	1	1	Test
N396S	0	0.232117	0	Test
V143M	0	0	0	Test
A306P	1	1	1	Test
G756S	0	0	0	Test
T276I	1	1	1	Test
G574D	1	1	1	Test
Y280H	1	1	1	Test
V103D	1	1	1	Test
S358F	1	1	1	Test
Q188P	1	1	1	Test
L293P	1	1	1	Test
Y284D	1	1	1	Test
R210C	1	1	1	Test
Y154H	1	1	1	Test
V450M	0	0	0	Test
W270R	1	1	1	Test
P308S	1	1	1	Test
A761S	0	0	0	Test
Y237C	1	1	1	Test
R333W	1	1	1	Test
G281R	1	1	1	Test
F261S	1	1	1	Test
K327M	1	1	1	Test
D282N	1	1	1	Test
T194P	1	1	1	Test
F496I	0	0	0	Test
R581Q	1	1	1	Test
G159E	1	0.519298	1	Test
R332G	1	1	1	Test
A495P	1	0.597031	0	Test
S751L	0	0	0	Test
S187Y	1	1	1	Test
T274M	1	1	1	Test
D563E	0	0.345058	1	Test
V567D	1	1	1	Test
T277I	1	1	1	Test
Y237F	1	1	1	Test
R691H	0	0	0	Test
P772L	0	0	0	Test
M578V	1	1	1	Test
H228Y	1	1	1	Test
L339R	1	1	1	Test
P776H	0	0	0	Test
A306V	1	1	1	Test
F261I	1	1	1	Test
A43V	0	0.156011	0	Test
R198Q	1	1	1	Test
A97V	0	0.427828	0	Test
R581L	1	1	1	Test
G869R	0	0	0	Test
R353H	0	0.168531	1	Test
G315E	0	0.0820827	1	Test
L107F	1	0.793422	1	Test
A309V	1	1	1	Test
D355E	1	0.722721	1	Test
H228R	1	0.639633	1	Test
G418V	0	0	0	Test
R604C	0	0	0	Test
R504W	0	0	1	Test
R800H	0	0.0690469	0	Test
H96N	1	0.831365	1	Test
R560Q	1	1	1	Test
G279C	1	1	1	Test

## Sheet: XGBoost
Variant	Prediction	Score	Label	Group
G310S	1	0.969812	1	Train
A253T	1	0.973788	1	Train
L243F	1	0.973788	1	Train
R547W	0	0.479337	1	Train
L268F	1	0.973788	1	Train
D282Y	1	0.973788	1	Train
R201C	1	0.973788	1	Train
R207W	1	0.973788	1	Train
P88L	1	0.935439	1	Train
M208V	1	0.973788	1	Train
P335R	1	0.966105	1	Train
Y284H	1	0.973788	1	Train
N79K	1	0.781381	1	Train
Y264N	1	0.973788	1	Train
L81P	1	0.935439	1	Train
R333Q	1	0.961009	1	Train
G159R	1	0.938719	1	Train
A193D	1	0.949302	1	Train
R553Q	1	0.929184	1	Train
M546V	0	0.456553	1	Train
R144Q	0	0.458201	1	Train
G301S	1	0.973788	1	Train
R553L	1	0.929184	1	Train
T263I	1	0.973788	1	Train
G301D	1	0.973788	1	Train
R201H	1	0.973788	1	Train
T276N	1	0.973788	1	Train
K552T	1	0.929184	1	Train
A294V	1	0.938719	1	Train
S223P	1	0.935439	1	Train
R553W	1	0.929184	1	Train
P561S	1	0.935439	1	Train
N190S	1	0.949302	1	Train
L161P	0	0.458201	1	Train
F555L	1	0.962693	1	Train
R210P	1	0.973788	1	Train
A294G	1	0.938719	1	Train
G279S	1	0.949302	1	Train
E130K	1	0.973788	1	Train
T234I	1	0.973788	1	Train
W269C	1	0.973788	1	Train
C169R	1	0.947906	1	Train
K319T	1	0.935439	1	Train
R207Q	1	0.973788	1	Train
T114I	0	0.207178	1	Train
A343G	1	0.933156	1	Train
S113F	1	0.938719	1	Train
V320I	1	0.935439	1	Train
T287A	1	0.973788	1	Train
T277S	1	0.949302	1	Train
A265V	1	0.973788	1	Train
L200P	1	0.973788	1	Train
T287N	1	0.973788	1	Train
A185T	1	0.973788	1	Train
D212Y	1	0.973788	1	Train
V589G	1	0.969563	1	Train
P285T	1	0.973788	1	Train
D566H	1	0.936161	1	Train
R213W	1	0.973788	1	Train
S314T	1	0.935439	1	Train
Q341H	1	0.933156	1	Train
D282V	1	0.973788	1	Train
R214W	1	0.973788	1	Train
E119G	1	0.938719	1	Train
V224A	1	0.91248	1	Train
S352P	1	0.921583	1	Train
C242G	1	0.973788	1	Train
I582F	1	0.969563	1	Train
R144W	0	0.458201	1	Train
A348T	1	0.961009	1	Train
K583N	1	0.969563	1	Train
Y363H	1	0.933156	1	Train
M578I	1	0.969563	1	Train
T234P	1	0.973788	1	Train
A246P	1	0.973788	1	Train
R395G	1	0.921583	1	Train
G271V	1	0.973788	1	Train
P308L	1	0.969812	1	Train
I311M	1	0.973788	1	Train
P561L	1	0.935439	1	Train
A265G	1	0.973788	1	Train
H260Y	1	0.938719	1	Train
M565T	1	0.508226	1	Train
L351F	1	0.921583	1	Train
L637R	1	0.923953	1	Train
G216V	1	0.973788	1	Train
G256R	1	0.938719	1	Train
N190I	1	0.949302	1	Train
W344R	1	0.961009	1	Train
R214Q	1	0.973788	1	Train
R353G	1	0.933156	1	Train
E231Q	1	0.935439	1	Train
M1I	1	0.745051	1	Train
I278T	1	0.949302	1	Train
L356Q	1	0.961009	1	Train
Y362C	1	0.966105	1	Train
A196V	1	0.969812	1	Train
Q204R	1	0.973788	1	Train
I340M	1	0.961009	1	Train
I340T	1	0.961009	1	Train
L351V	1	0.921583	1	Train
D282H	1	0.973788	1	Train
Q204H	1	0.973788	1	Train
A265T	1	0.973788	1	Train
H324R	1	0.935439	1	Train
M546T	0	0.456553	1	Train
R332K	1	0.961009	1	Train
V132M	1	0.969812	1	Train
E231G	1	0.935439	1	Train
R588S	1	0.969563	1	Train
S195P	1	0.969812	1	Train
L243V	1	0.973788	1	Train
V250L	1	0.973788	1	Train
E231D	1	0.935439	1	Train
G290V	1	0.973788	1	Train
S229I	1	0.935439	1	Train
N350H	1	0.921583	1	Train
M1V	1	0.745051	1	Train
W269L	1	0.973788	1	Train
G315A	1	0.935439	1	Train
F304S	1	0.973788	1	Train
Q188K	1	0.973788	1	Train
S247W	1	0.973788	1	Train
R291S	1	0.973788	1	Train
I209T	1	0.973788	1	Train
D488E	0	0.0501947	1	Train
G281W	1	0.973788	1	Train
F104S	1	0.938719	1	Train
R541G	1	0.929184	1	Train
V250G	1	0.973788	1	Train
K554N	1	0.935962	1	Train
Y284C	1	0.973788	1	Train
D259Y	0	0.480496	1	Train
R291G	1	0.973788	1	Train
G290D	1	0.973788	1	Train
L203P	1	0.973788	1	Train
P561R	1	0.935439	1	Train
I273N	1	0.973788	1	Train
A235V	1	0.973788	1	Train
K556E	1	0.966105	1	Train
P285S	1	0.973788	1	Train
G271D	1	0.973788	1	Train
T716I	1	0.761039	1	Train
T234A	1	0.973788	1	Train
D563Y	1	0.936161	1	Train
G222D	1	0.935439	1	Train
T217A	1	0.973788	1	Train
P285H	1	0.973788	1	Train
P335L	1	0.966105	1	Train
D563N	1	0.936161	1	Train
V175L	0	0.458201	1	Train
D212A	1	0.973788	1	Train
R353C	1	0.933156	1	Train
W269S	1	0.973788	1	Train
D282E	1	0.973788	1	Train
A306T	1	0.973788	1	Train
T276P	1	0.973788	1	Train
A501P	0	0.0462384	1	Train
F261C	1	0.969812	1	Train
I568T	1	0.966488	1	Train
R213Q	1	0.973788	1	Train
T359K	1	0.966105	1	Train
L245P	1	0.973788	1	Train
S195F	1	0.969812	1	Train
N350I	1	0.921583	1	Train
I205V	1	0.973788	1	Train
E140Q	0	0.207178	1	Train
P335A	1	0.966105	1	Train
G301V	1	0.973788	1	Train
H228Q	1	0.935439	1	Train
G256W	1	0.938719	1	Train
I340N	1	0.961009	1	Train
V182M	1	0.949302	1	Train
G256V	1	0.938719	1	Train
Y154D	1	0.938719	1	Train
Y363C	1	0.933156	1	Train
K283R	1	0.973788	1	Train
A337T	1	0.966105	1	Train
R325G	1	0.935439	1	Train
I592M	1	0.936161	1	Train
G189V	1	0.969812	1	Train
G313R	1	0.935439	1	Train
L206R	1	0.973788	1	Train
D266E	1	0.973788	1	Train
T114A	0	0.207178	1	Train
L292P	1	0.973788	1	Train
M1K	1	0.745051	1	Train
G215R	1	0.973788	1	Train
D355G	1	0.961009	1	Train
N258I	0	0.480496	1	Train
F305L	1	0.973788	1	Train
L356R	1	0.961009	1	Train
L356V	1	0.961009	1	Train
H96P	1	0.938719	1	Train
L268P	1	0.973788	1	Train
T296P	0	0.452576	1	Train
R213L	1	0.973788	1	Train
A265P	1	0.973788	1	Train
S122L	1	0.947906	1	Train
L197P	1	0.969812	1	Train
N258S	0	0.480496	1	Train
W218R	1	0.973788	1	Train
T277A	1	0.949302	1	Train
R560W	1	0.935439	1	Train
G239R	1	0.947906	1	Train
T857I	0	0.0175325	0	Train
R604H	0	0.0448006	0	Train
R854C	0	0.0175325	0	Train
P848L	0	0.0175325	0	Train
A703V	0	0.0175325	0	Train
F527I	0	0.0462384	0	Train
P29S	0	0.0183852	0	Train
P370L	0	0.0462384	0	Train
D675E	0	0.0175325	0	Train
V367I	0	0.0462384	0	Train
A611T	0	0.0448006	0	Train
R489G	0	0.0462384	0	Train
A64S	0	0.0183852	0	Train
P652R	0	0.0175325	0	Train
D470N	0	0.0462384	0	Train
A754T	0	0.0175325	0	Train
V690M	0	0.0175325	0	Train
R782Q	0	0.0175325	0	Train
P617S	0	0.423164	0	Train
V793L	0	0.0175325	0	Train
P651R	0	0.0175325	0	Train
A707T	0	0.0175325	0	Train
A502V	0	0.0462384	0	Train
V139M	0	0.196855	0	Train
E515D	0	0.0462384	0	Train
V593M	1	0.508226	0	Train
I689L	0	0.0175325	0	Train
A657T	0	0.0175325	0	Train
A404T	0	0.0462384	0	Train
G30S	0	0.0183852	0	Train
H795N	0	0.0175325	0	Train
G858S	0	0.0175325	0	Train
G624R	0	0.0455123	0	Train
R725C	0	0.0175325	0	Train
P668L	0	0.0175325	0	Train
P411L	0	0.0462384	0	Train
R760H	0	0.0175325	0	Train
P652L	0	0.0175325	0	Train
A822T	0	0.0371055	0	Train
A62V	0	0.0183852	0	Train
G697S	0	0.0175325	0	Train
T605S	0	0.0448006	0	Train
P424S	0	0.157257	0	Train
Y755C	0	0.0175325	0	Train
P777R	0	0.0175325	0	Train
D520G	0	0.0501947	0	Train
Y658C	0	0.0175325	0	Train
P724L	0	0.0175325	0	Train
P664L	0	0.0175325	0	Train
I517V	0	0.0462384	0	Train
I177V	0	0.156386	0	Train
F659S	0	0.0175325	0	Train
N780T	0	0.0175325	0	Train
I686V	0	0.0175325	0	Train
P410L	0	0.0462384	0	Train
C849F	0	0.0175325	0	Train
P772R	0	0.0175325	0	Train
R767Q	0	0.0175325	0	Train
G8S	0	0.0183852	0	Train
T696M	0	0.0175325	0	Train
R647Q	0	0.0448006	0	Train
E778K	0	0.0175325	0	Train
Q3E	0	0.154364	0	Train
G8R	0	0.0183852	0	Train
G16E	0	0.0183852	0	Train
L20V	0	0.154364	0	Train
V25M	0	0.0403095	0	Train
G26E	0	0.0183852	0	Train
G30A	0	0.0183852	0	Train
S34F	0	0.0526138	0	Train
T35S	0	0.157348	0	Train
I53T	0	0.0558994	0	Train
P57S	0	0.0183852	0	Train
R58C	0	0.0183852	0	Train
G60A	0	0.0183852	0	Train
P67S	0	0.0183852	0	Train
P67A	0	0.0183852	0	Train
R75H	0	0.165497	0	Train
Q78K	1	0.742141	0	Train
W91G	1	0.773692	0	Train
V108M	1	0.938719	0	Train
K116R	0	0.0462384	0	Train
E117D	0	0.0462384	0	Train
E117G	0	0.0462384	0	Train
F142L	0	0.0512823	0	Train
V143L	0	0.156386	0	Train
R160Q	0	0.444276	0	Train
K162R	0	0.196855	0	Train
R165W	0	0.0512823	0	Train
P167L	0	0.200436	0	Train
L176V	0	0.207178	0	Train
V225I	1	0.781381	0	Train
G256E	1	0.938719	0	Train
D259H	0	0.480496	0	Train
D259N	0	0.480496	0	Train
A295S	0	0.444276	0	Train
H357R	1	0.961009	0	Train
R365Q	0	0.0462384	0	Train
V367A	0	0.0462384	0	Train
T368N	0	0.0462384	0	Train
V369M	0	0.0462384	0	Train
M371V	0	0.0462384	0	Train
Q375E	0	0.0462384	0	Train
G380A	0	0.0501947	0	Train
G380R	0	0.0501947	0	Train
I385L	0	0.0501947	0	Train
P387R	0	0.0462384	0	Train
S399G	0	0.380171	0	Train
L403F	0	0.0501947	0	Train
D408E	0	0.0462384	0	Train
D408V	0	0.0462384	0	Train
P411Q	0	0.0462384	0	Train
P413L	0	0.0462384	0	Train
G418A	0	0.0462384	0	Train
P420L	0	0.0462384	0	Train
P424L	0	0.157257	0	Train
G431R	0	0.0462384	0	Train
R432H	0	0.0462384	0	Train
Q435R	0	0.0462384	0	Train
D441G	0	0.0462384	0	Train
R442C	0	0.0462384	0	Train
A451V	0	0.0462384	0	Train
S457F	0	0.0462384	0	Train
Q461P	0	0.0462384	0	Train
R465Q	0	0.0462384	0	Train
R465W	0	0.0462384	0	Train
A469T	0	0.0462384	0	Train
E474K	0	0.160262	0	Train
S478G	0	0.415068	0	Train
R489H	0	0.0462384	0	Train
R493H	0	0.0462384	0	Train
R497C	0	0.0462384	0	Train
I498L	0	0.0462384	0	Train
K499R	0	0.0462384	0	Train
A502T	0	0.0462384	0	Train
R504Q	0	0.0462384	0	Train
E509A	0	0.123676	0	Train
G514R	0	0.0462384	0	Train
S522N	0	0.0501947	0	Train
C523Y	0	0.0462384	0	Train
C525S	0	0.0462384	0	Train
E526Q	0	0.0462384	0	Train
L532P	0	0.0502489	0	Train
K537R	0	0.463379	0	Train
V538I	0	0.473304	0	Train
V543M	0	0.463379	0	Train
V545I	0	0.239304	0	Train
V564L	0	0.499837	0	Train
A598V	0	0.0448006	0	Train
T600M	0	0.0448006	0	Train
D601N	0	0.0448006	0	Train
T605I	0	0.0448006	0	Train
P608L	0	0.0448006	0	Train
A611V	0	0.0448006	0	Train
R622W	0	0.162763	0	Train
G624W	0	0.0455123	0	Train
M633T	0	0.0455123	0	Train
M633V	0	0.0455123	0	Train
E634Q	0	0.0448006	0	Train
K635N	0	0.128184	0	Train
L640M	0	0.162763	0	Train
Q646R	0	0.0448006	0	Train
R647W	0	0.0448006	0	Train
G649V	0	0.0175325	0	Train
G649A	0	0.0175325	0	Train
E654V	0	0.0175325	0	Train
E656D	0	0.0175325	0	Train
E656K	0	0.0175325	0	Train
G660R	0	0.0175325	0	Train
G660V	0	0.0175325	0	Train
E663G	0	0.0175325	0	Train
P664T	0	0.0175325	0	Train
P666L	0	0.0175325	0	Train
P666Q	0	0.0175325	0	Train
A667V	0	0.0175325	0	Train
R677Q	0	0.0175325	0	Train
R677W	0	0.0175325	0	Train
V680G	0	0.0175325	0	Train
H683R	0	0.0175325	0	Train
G684S	0	0.0175325	0	Train
I689F	0	0.0175325	0	Train
R691C	0	0.0175325	0	Train
S694T	0	0.0175325	0	Train
N700K	0	0.0175325	0	Train
S702L	0	0.0175325	0	Train
P704L	0	0.0175325	0	Train
P705L	0	0.0175325	0	Train
A706D	0	0.0175325	0	Train
A707V	0	0.0175325	0	Train
P713A	0	0.0371055	0	Train
P714H	0	0.0515228	0	Train
P724S	0	0.0175325	0	Train
G727S	0	0.0175325	0	Train
T730A	0	0.0175325	0	Train
S731A	0	0.0175325	0	Train
P732S	0	0.0175325	0	Train
R741L	0	0.0175325	0	Train
P743L	0	0.0175325	0	Train
P745L	0	0.0175325	0	Train
H748Q	0	0.0175325	0	Train
R760C	0	0.0175325	0	Train
R767W	0	0.0175325	0	Train
Q768R	0	0.0175325	0	Train
P772A	0	0.0175325	0	Train
P777S	0	0.0175325	0	Train
E778V	0	0.0175325	0	Train
G779R	0	0.0175325	0	Train
L781P	0	0.0175325	0	Train
R782W	0	0.0175325	0	Train
S789T	0	0.0484812	0	Train
E796K	0	0.0405179	0	Train
K811R	0	0.0175325	0	Train
D815E	0	0.14345	0	Train
A822V	0	0.0371055	0	Train
K829E	0	0.0175325	0	Train
A835V	0	0.0371055	0	Train
E838G	0	0.155937	0	Train
C846R	0	0.0175325	0	Train
G850R	0	0.0175325	0	Train
P852L	0	0.0175325	0	Train
R854H	0	0.0175325	0	Train
S855L	0	0.0175325	0	Train
T857A	0	0.0175325	0	Train
V865M	0	0.0484812	0	Train
V865G	0	0.0484812	0	Train
G869E	0	0.0175325	0	Train
R871S	0	0.0175325	0	Train
R871G	0	0.0175325	0	Train
G290S	1	0.973788	1	Test
R581G	1	0.969563	1	Test
S303C	1	0.973788	1	Test
S247L	1	0.973788	1	Test
A253S	1	0.973788	1	Test
D563G	1	0.936161	1	Test
L241P	1	0.973788	1	Test
V135M	0	0.452576	0	Test
L339Q	1	0.966105	1	Test
T359A	1	0.966105	1	Test
S374L	0	0.0462384	0	Test
P458S	0	0.0462384	0	Test
P708A	0	0.0175325	0	Test
M1T	1	0.745051	1	Test
A337G	1	0.966105	1	Test
D212E	1	0.973788	1	Test
G737S	0	0.0175325	0	Test
A828V	0	0.0175325	0	Test
D675N	0	0.0175325	0	Test
R432C	0	0.0462384	0	Test
D212G	1	0.973788	1	Test
A611S	0	0.0448006	0	Test
E254A	1	0.973788	1	Test
T771I	0	0.0175325	0	Test
R210H	1	0.973788	1	Test
G315R	1	0.935439	1	Test
N396S	0	0.380171	0	Test
V143M	0	0.156386	0	Test
A306P	1	0.973788	1	Test
G756S	0	0.0175325	0	Test
T276I	1	0.973788	1	Test
G574D	1	0.969563	1	Test
Y280H	1	0.973788	1	Test
V103D	1	0.947906	1	Test
S358F	1	0.966105	1	Test
Q188P	1	0.973788	1	Test
L293P	1	0.969812	1	Test
Y284D	1	0.973788	1	Test
R210C	1	0.973788	1	Test
Y154H	1	0.938719	1	Test
V450M	0	0.0462384	0	Test
W270R	1	0.973788	1	Test
P308S	1	0.969812	1	Test
A761S	0	0.0175325	0	Test
Y237C	1	0.947906	1	Test
R333W	1	0.961009	1	Test
G281R	1	0.973788	1	Test
F261S	1	0.969812	1	Test
K327M	1	0.935439	1	Test
D282N	1	0.973788	1	Test
T194P	1	0.969812	1	Test
F496I	0	0.0462384	0	Test
R581Q	1	0.969563	1	Test
G159E	1	0.938719	1	Test
R332G	1	0.961009	1	Test
A495P	0	0.0462384	0	Test
S751L	0	0.0175325	0	Test
S187Y	1	0.973788	1	Test
T274M	1	0.973788	1	Test
D563E	1	0.936161	1	Test
V567D	1	0.936161	1	Test
T277I	1	0.949302	1	Test
Y237F	1	0.947906	1	Test
R691H	0	0.0175325	0	Test
P772L	0	0.0175325	0	Test
M578V	1	0.969563	1	Test
H228Y	1	0.935439	1	Test
L339R	1	0.966105	1	Test
P776H	0	0.0175325	0	Test
A306V	1	0.973788	1	Test
F261I	1	0.969812	1	Test
A43V	0	0.154364	0	Test
R198Q	1	0.973788	1	Test
A97V	0	0.480496	0	Test
R581L	1	0.969563	1	Test
G869R	0	0.0175325	0	Test
R353H	1	0.933156	1	Test
G315E	1	0.935439	1	Test
L107F	1	0.938719	1	Test
A309V	1	0.969812	1	Test
D355E	1	0.961009	1	Test
H228R	1	0.935439	1	Test
G418V	0	0.0462384	0	Test
R604C	0	0.0448006	0	Test
R504W	0	0.0462384	1	Test
R800H	0	0.14345	0	Test
H96N	1	0.938719	1	Test
R560Q	1	0.935439	1	Test
G279C	1	0.949302	1	Test

## Sheet: Random Forest
Variant	Prediction	Score	Label	Group
G310S	1	0.993519	1	Train
A253T	1	0.983333	1	Train
L243F	1	1	1	Train
R547W	1	0.766667	1	Train
L268F	1	1	1	Train
D282Y	1	0.983333	1	Train
R201C	1	0.989891	1	Train
R207W	1	0.983333	1	Train
P88L	1	0.9	1	Train
M208V	1	1	1	Train
P335R	1	1	1	Train
Y284H	1	0.983333	1	Train
N79K	1	0.793333	1	Train
Y264N	1	1	1	Train
L81P	1	0.883333	1	Train
R333Q	1	0.996991	1	Train
G159R	1	0.973224	1	Train
A193D	1	0.996991	1	Train
R553Q	1	0.999074	1	Train
M546V	1	0.751282	1	Train
R144Q	1	0.819787	1	Train
G301S	1	0.994444	1	Train
R553L	1	1	1	Train
T263I	1	1	1	Train
G301D	1	0.943939	1	Train
R201H	1	0.989891	1	Train
T276N	1	0.983333	1	Train
K552T	1	0.983333	1	Train
A294V	1	0.904167	1	Train
S223P	1	1	1	Train
R553W	1	1	1	Train
P561S	1	1	1	Train
N190S	1	0.983333	1	Train
L161P	1	0.673625	1	Train
F555L	1	1	1	Train
R210P	1	1	1	Train
A294G	1	0.897974	1	Train
G279S	1	0.994444	1	Train
E130K	1	1	1	Train
T234I	1	1	1	Train
W269C	1	1	1	Train
C169R	1	0.983333	1	Train
K319T	1	1	1	Train
R207Q	1	1	1	Train
T114I	1	0.9	1	Train
A343G	1	0.999074	1	Train
S113F	1	0.95	1	Train
V320I	1	0.916667	1	Train
T287A	1	0.983333	1	Train
T277S	1	1	1	Train
A265V	1	0.989891	1	Train
L200P	1	0.943939	1	Train
T287N	1	1	1	Train
A185T	1	0.994444	1	Train
D212Y	1	1	1	Train
V589G	1	0.854762	1	Train
P285T	1	0.989891	1	Train
D566H	1	1	1	Train
R213W	1	1	1	Train
S314T	1	1	1	Train
Q341H	1	0.996991	1	Train
D282V	1	0.983333	1	Train
R214W	1	1	1	Train
E119G	1	0.85125	1	Train
V224A	1	0.9	1	Train
S352P	1	0.966667	1	Train
C242G	1	1	1	Train
I582F	1	1	1	Train
R144W	1	0.917544	1	Train
A348T	1	0.999074	1	Train
K583N	1	1	1	Train
Y363H	1	0.965741	1	Train
M578I	1	0.966667	1	Train
T234P	1	1	1	Train
A246P	1	1	1	Train
R395G	1	0.989891	1	Train
G271V	1	1	1	Train
P308L	1	0.977778	1	Train
I311M	1	0.983333	1	Train
P561L	1	0.983333	1	Train
A265G	1	0.989891	1	Train
H260Y	1	0.983333	1	Train
M565T	1	0.900877	1	Train
L351F	1	0.890768	1	Train
L637R	1	0.766667	1	Train
G216V	1	1	1	Train
G256R	1	0.810474	1	Train
N190I	1	0.966667	1	Train
W344R	1	0.996991	1	Train
R214Q	1	1	1	Train
R353G	1	0.989891	1	Train
E231Q	1	1	1	Train
M1I	1	0.916667	1	Train
I278T	1	0.988889	1	Train
L356Q	1	0.982407	1	Train
Y362C	1	0.989891	1	Train
A196V	1	0.983333	1	Train
Q204R	1	1	1	Train
I340M	1	0.966667	1	Train
I340T	1	1	1	Train
L351V	1	0.874101	1	Train
D282H	1	1	1	Train
Q204H	1	1	1	Train
A265T	1	0.989891	1	Train
H324R	1	1	1	Train
M546T	1	0.866667	1	Train
R332K	1	0.996991	1	Train
V132M	1	0.827183	1	Train
E231G	1	1	1	Train
R588S	1	0.861111	1	Train
S195P	1	0.983333	1	Train
L243V	1	1	1	Train
V250L	1	0.933333	1	Train
E231D	1	1	1	Train
G290V	1	1	1	Train
S229I	1	0.983333	1	Train
N350H	1	0.989891	1	Train
M1V	1	0.966667	1	Train
W269L	1	1	1	Train
G315A	1	1	1	Train
F304S	1	1	1	Train
Q188K	1	1	1	Train
S247W	1	1	1	Train
R291S	1	1	1	Train
I209T	1	1	1	Train
D488E	1	0.537037	1	Train
G281W	1	1	1	Train
F104S	1	0.933333	1	Train
R541G	1	0.989891	1	Train
V250G	1	0.983333	1	Train
K554N	1	0.999074	1	Train
Y284C	1	0.989891	1	Train
D259Y	1	0.703846	1	Train
R291G	1	1	1	Train
G290D	1	0.966667	1	Train
L203P	1	1	1	Train
P561R	1	1	1	Train
I273N	1	1	1	Train
A235V	1	1	1	Train
K556E	1	1	1	Train
P285S	1	0.989891	1	Train
G271D	1	1	1	Train
T716I	1	0.883333	1	Train
T234A	1	1	1	Train
D563Y	1	1	1	Train
G222D	1	0.983333	1	Train
T217A	1	1	1	Train
P285H	1	0.989891	1	Train
P335L	1	1	1	Train
D563N	1	1	1	Train
V175L	1	0.648184	1	Train
D212A	1	1	1	Train
R353C	1	0.989891	1	Train
W269S	1	1	1	Train
D282E	1	1	1	Train
A306T	1	0.977778	1	Train
T276P	1	0.983333	1	Train
A501P	1	0.675261	1	Train
F261C	1	0.999074	1	Train
I568T	1	1	1	Train
R213Q	1	1	1	Train
T359K	1	1	1	Train
L245P	1	1	1	Train
S195F	1	0.983333	1	Train
N350I	1	0.983333	1	Train
I205V	1	1	1	Train
E140Q	1	0.709211	1	Train
P335A	1	0.983333	1	Train
G301V	1	1	1	Train
H228Q	1	1	1	Train
G256W	1	1	1	Train
I340N	1	1	1	Train
V182M	1	0.811111	1	Train
G256V	1	1	1	Train
Y154D	1	0.983333	1	Train
Y363C	1	0.988965	1	Train
K283R	1	0.989891	1	Train
A337T	1	1	1	Train
R325G	1	1	1	Train
I592M	1	0.916667	1	Train
G189V	1	1	1	Train
G313R	1	0.983333	1	Train
L206R	1	1	1	Train
D266E	1	1	1	Train
T114A	1	0.933333	1	Train
L292P	1	0.960606	1	Train
M1K	1	0.905556	1	Train
G215R	1	1	1	Train
D355G	1	1	1	Train
N258I	1	0.970513	1	Train
F305L	1	1	1	Train
L356R	1	0.982407	1	Train
L356V	1	0.973224	1	Train
H96P	1	0.95	1	Train
L268P	1	1	1	Train
T296P	1	0.966667	1	Train
R213L	1	1	1	Train
A265P	1	0.989891	1	Train
S122L	1	0.96	1	Train
L197P	1	0.860606	1	Train
N258S	1	0.887179	1	Train
W218R	1	1	1	Train
T277A	1	1	1	Train
R560W	1	1	1	Train
G239R	1	0.999074	1	Train
T857I	0	0.0666667	0	Train
R604H	0	0	0	Train
R854C	0	0	0	Train
P848L	0	0.0166667	0	Train
A703V	0	0	0	Train
F527I	0	0.00655738	0	Train
P29S	0	0	0	Train
P370L	0	0.00655738	0	Train
D675E	0	0	0	Train
V367I	0	0.0116856	0	Train
A611T	0	0.0037037	0	Train
R489G	0	0.00655738	0	Train
A64S	0	0	0	Train
P652R	0	0	0	Train
D470N	0	0.0538462	0	Train
A754T	0	0	0	Train
V690M	0	0	0	Train
R782Q	0	0	0	Train
P617S	0	0.1	0	Train
V793L	0	0	0	Train
P651R	0	0	0	Train
A707T	0	0	0	Train
A502V	0	0.0315574	0	Train
V139M	0	0.192437	0	Train
E515D	0	0.00119048	0	Train
V593M	0	0.0574346	0	Train
I689L	0	0	0	Train
A657T	0	0	0	Train
A404T	0	0.0203704	0	Train
G30S	0	0	0	Train
H795N	0	0	0	Train
G858S	0	0	0	Train
G624R	0	0	0	Train
R725C	0	0	0	Train
P668L	0	0	0	Train
P411L	0	0	0	Train
R760H	0	0	0	Train
P652L	0	0	0	Train
A822T	0	0	0	Train
A62V	0	0	0	Train
G697S	0	0	0	Train
T605S	0	0.00119048	0	Train
P424S	0	0.00119048	0	Train
Y755C	0	0	0	Train
P777R	0	0	0	Train
D520G	0	0	0	Train
Y658C	0	0	0	Train
P724L	0	0	0	Train
P664L	0	0	0	Train
I517V	0	0.00119048	0	Train
I177V	0	0.0346154	0	Train
F659S	0	0	0	Train
N780T	0	0	0	Train
I686V	0	0	0	Train
P410L	0	0	0	Train
C849F	0	0	0	Train
P772R	0	0	0	Train
R767Q	0	0	0	Train
G8S	0	0	0	Train
T696M	0	0	0	Train
R647Q	0	0	0	Train
E778K	0	0	0	Train
Q3E	0	0.0666667	0	Train
G8R	0	0	0	Train
G16E	0	0.0333333	0	Train
L20V	0	0.1	0	Train
V25M	0	0.0166667	0	Train
G26E	0	0.0166667	0	Train
G30A	0	0	0	Train
S34F	0	0	0	Train
T35S	0	0.0166667	0	Train
I53T	0	0.0166667	0	Train
P57S	0	0	0	Train
R58C	0	0	0	Train
G60A	0	0	0	Train
P67S	0	0	0	Train
P67A	0	0	0	Train
R75H	0	0.133333	0	Train
Q78K	0	0.320317	0	Train
W91G	0	0.343651	0	Train
V108M	0	0.356349	0	Train
K116R	0	0.05	0	Train
E117D	0	0.0433333	0	Train
E117G	0	0.0766667	0	Train
F142L	0	0.109722	0	Train
V143L	0	0.184188	0	Train
R160Q	0	0.205618	0	Train
K162R	0	0.193399	0	Train
R165W	0	0.183333	0	Train
P167L	0	0.217949	0	Train
L176V	0	0.151282	0	Train
V225I	0	0.366667	0	Train
G256E	0	0.30463	0	Train
D259H	0	0.163846	0	Train
D259N	0	0.236068	0	Train
A295S	0	0.0939327	0	Train
H357R	0	0.273668	0	Train
R365Q	0	0.0283522	0	Train
V367A	0	0.00655738	0	Train
T368N	0	0.117857	0	Train
V369M	0	0.00655738	0	Train
M371V	0	0.0398907	0	Train
Q375E	0	0.0178571	0	Train
G380A	0	0	0	Train
G380R	0	0.00119048	0	Train
I385L	0	0.019246	0	Train
P387R	0	0	0	Train
S399G	0	0.0491012	0	Train
L403F	0	0.00913674	0	Train
D408E	0	0.037037	0	Train
D408V	0	0	0	Train
P411Q	0	0.00119048	0	Train
P413L	0	0.00833333	0	Train
G418A	0	0	0	Train
P420L	0	0.0166667	0	Train
P424L	0	0	0	Train
G431R	0	0.00119048	0	Train
R432H	0	0	0	Train
Q435R	0	0.00119048	0	Train
D441G	0	0.0705128	0	Train
R442C	0	0.0270702	0	Train
A451V	0	0	0	Train
S457F	0	0.00384615	0	Train
Q461P	0	0.15	0	Train
R465Q	0	0.0102611	0	Train
R465W	0	0.00384615	0	Train
A469T	0	0.0269277	0	Train
E474K	0	0.0139517	0	Train
S478G	0	0.182435	0	Train
R489H	0	0.00655738	0	Train
R493H	0	0.0116856	0	Train
R497C	0	0.0104035	0	Train
I498L	0	0.00119048	0	Train
K499R	0	0.00655738	0	Train
A502T	0	0.023224	0	Train
R504Q	0	0.0283522	0	Train
E509A	0	0	0	Train
G514R	0	0.0244145	0	Train
S522N	0	0.0178571	0	Train
C523Y	0	0.0166667	0	Train
C525S	0	0	0	Train
E526Q	0	0.0270702	0	Train
L532P	0	0.199137	0	Train
K537R	0	0.0319004	0	Train
V538I	0	0.0491012	0	Train
V543M	0	0.118826	0	Train
V545I	0	0.134722	0	Train
V564L	0	0.251839	0	Train
A598V	0	0	0	Train
T600M	0	0	0	Train
D601N	0	0.0166667	0	Train
T605I	0	0.0666667	0	Train
P608L	0	0	0	Train
A611V	0	0	0	Train
R622W	0	0.15	0	Train
G624W	0	0.0166667	0	Train
M633T	0	0.0166667	0	Train
M633V	0	0	0	Train
E634Q	0	0	0	Train
K635N	0	0	0	Train
L640M	0	0	0	Train
Q646R	0	0	0	Train
R647W	0	0.0166667	0	Train
G649V	0	0	0	Train
G649A	0	0	0	Train
E654V	0	0	0	Train
E656D	0	0	0	Train
E656K	0	0	0	Train
G660R	0	0	0	Train
G660V	0	0	0	Train
E663G	0	0	0	Train
P664T	0	0	0	Train
P666L	0	0	0	Train
P666Q	0	0	0	Train
A667V	0	0	0	Train
R677Q	0	0	0	Train
R677W	0	0	0	Train
V680G	0	0	0	Train
H683R	0	0	0	Train
G684S	0	0	0	Train
I689F	0	0	0	Train
R691C	0	0	0	Train
S694T	0	0	0	Train
N700K	0	0	0	Train
S702L	0	0	0	Train
P704L	0	0	0	Train
P705L	0	0	0	Train
A706D	0	0.0333333	0	Train
A707V	0	0	0	Train
P713A	0	0	0	Train
P714H	0	0	0	Train
P724S	0	0	0	Train
G727S	0	0	0	Train
T730A	0	0	0	Train
S731A	0	0	0	Train
P732S	0	0	0	Train
R741L	0	0	0	Train
P743L	0	0	0	Train
P745L	0	0	0	Train
H748Q	0	0	0	Train
R760C	0	0	0	Train
R767W	0	0	0	Train
Q768R	0	0	0	Train
P772A	0	0	0	Train
P777S	0	0	0	Train
E778V	0	0	0	Train
G779R	0	0	0	Train
L781P	0	0.0333333	0	Train
R782W	0	0	0	Train
S789T	0	0.0166667	0	Train
E796K	0	0	0	Train
K811R	0	0	0	Train
D815E	0	0.0166667	0	Train
A822V	0	0	0	Train
K829E	0	0	0	Train
A835V	0	0.0166667	0	Train
E838G	0	0.1	0	Train
C846R	0	0.0166667	0	Train
G850R	0	0	0	Train
P852L	0	0	0	Train
R854H	0	0	0	Train
S855L	0	0	0	Train
T857A	0	0	0	Train
V865M	0	0	0	Train
V865G	0	0	0	Train
G869E	0	0.0333333	0	Train
R871S	0	0	0	Train
R871G	0	0	0	Train
G290S	1	0.983333	1	Test
R581G	1	1	1	Test
S303C	1	0.981944	1	Test
S247L	1	1	1	Test
A253S	1	0.983333	1	Test
D563G	1	1	1	Test
L241P	1	1	1	Test
V135M	0	0.341155	0	Test
L339Q	1	0.836201	1	Test
T359A	1	1	1	Test
S374L	0	0	0	Test
P458S	0	0.0244145	0	Test
P708A	0	0	0	Test
M1T	1	0.9	1	Test
A337G	1	1	1	Test
D212E	1	0.983333	1	Test
G737S	0	0	0	Test
A828V	0	0	0	Test
D675N	0	0	0	Test
R432C	0	0	0	Test
D212G	1	0.983333	1	Test
A611S	0	0.00119048	0	Test
E254A	1	1	1	Test
T771I	0	0.0666667	0	Test
R210H	1	0.983333	1	Test
G315R	1	0.983333	1	Test
N396S	0	0.268225	0	Test
V143M	0	0.14156	0	Test
A306P	1	0.994444	1	Test
G756S	0	0	0	Test
T276I	1	0.966667	1	Test
G574D	1	1	1	Test
Y280H	1	0.966667	1	Test
V103D	1	0.872222	1	Test
S358F	1	1	1	Test
Q188P	1	1	1	Test
L293P	1	0.860606	1	Test
Y284D	1	1	1	Test
R210C	1	0.983333	1	Test
Y154H	1	0.916667	1	Test
V450M	0	0.0037037	0	Test
W270R	1	1	1	Test
P308S	1	0.98955	1	Test
A761S	0	0	0	Test
Y237C	1	0.999074	1	Test
R333W	1	0.997917	1	Test
G281R	1	0.973224	1	Test
F261S	1	0.999074	1	Test
K327M	1	0.933333	1	Test
D282N	1	1	1	Test
T194P	1	0.982407	1	Test
F496I	0	0.00655738	0	Test
R581Q	1	1	1	Test
G159E	1	0.85	1	Test
R332G	1	0.997917	1	Test
A495P	0	0.391928	0	Test
S751L	0	0.0166667	0	Test
S187Y	1	0.9875	1	Test
T274M	1	0.983333	1	Test
D563E	1	0.915741	1	Test
V567D	1	0.799074	1	Test
T277I	1	0.95	1	Test
Y237F	1	0.916667	1	Test
R691H	0	0	0	Test
P772L	0	0	0	Test
M578V	1	1	1	Test
H228Y	1	1	1	Test
L339R	1	0.836201	1	Test
P776H	0	0	0	Test
A306V	1	0.994444	1	Test
F261I	1	0.933333	1	Test
A43V	0	0.0166667	0	Test
R198Q	1	0.983333	1	Test
A97V	0	0.216667	0	Test
R581L	1	1	1	Test
G869R	0	0	0	Test
R353H	1	0.989891	1	Test
G315E	1	0.983333	1	Test
L107F	1	0.621627	1	Test
A309V	1	0.881944	1	Test
D355E	1	0.932407	1	Test
H228R	1	1	1	Test
G418V	0	0	0	Test
R604C	0	0	0	Test
R504W	0	0.0538462	1	Test
R800H	0	0.0333333	0	Test
H96N	1	0.771627	1	Test
R560Q	1	1	1	Test
G279C	1	0.994444	1	Test

## Sheet: CatBoost
Variant	Prediction	Score	Label	Group
G310S	1	0.998474	1	Train
A253T	1	0.9992	1	Train
L243F	1	0.999255	1	Train
R547W	1	0.910763	1	Train
L268F	1	0.999372	1	Train
D282Y	1	0.999701	1	Train
R201C	1	0.999254	1	Train
R207W	1	0.999739	1	Train
P88L	1	0.992739	1	Train
M208V	1	0.999372	1	Train
P335R	1	0.999125	1	Train
Y284H	1	0.99929	1	Train
N79K	1	0.875653	1	Train
Y264N	1	0.999255	1	Train
L81P	1	0.995748	1	Train
R333Q	1	0.997501	1	Train
G159R	1	0.950589	1	Train
A193D	1	0.990856	1	Train
R553Q	1	0.966624	1	Train
M546V	1	0.845284	1	Train
R144Q	1	0.903775	1	Train
G301S	1	0.999255	1	Train
R553L	1	0.997007	1	Train
T263I	1	0.999701	1	Train
G301D	1	0.999255	1	Train
R201H	1	0.999254	1	Train
T276N	1	0.999125	1	Train
K552T	1	0.975038	1	Train
A294V	1	0.961624	1	Train
S223P	1	0.997721	1	Train
R553W	1	0.997007	1	Train
P561S	1	0.992739	1	Train
N190S	1	0.988826	1	Train
L161P	1	0.903775	1	Train
F555L	1	0.998474	1	Train
R210P	1	0.999739	1	Train
A294G	1	0.961624	1	Train
G279S	1	0.992103	1	Train
E130K	1	0.999125	1	Train
T234I	1	0.999701	1	Train
W269C	1	0.999372	1	Train
C169R	1	0.979107	1	Train
K319T	1	0.995835	1	Train
R207Q	1	0.999372	1	Train
T114I	1	0.910763	1	Train
A343G	1	0.988903	1	Train
S113F	1	0.996578	1	Train
V320I	1	0.995835	1	Train
T287A	1	0.999739	1	Train
T277S	1	0.992103	1	Train
A265V	1	0.999254	1	Train
L200P	1	0.999269	1	Train
T287N	1	0.999372	1	Train
A185T	1	0.999269	1	Train
D212Y	1	0.999739	1	Train
V589G	1	0.9992	1	Train
P285T	1	0.999372	1	Train
D566H	1	0.975038	1	Train
R213W	1	0.999739	1	Train
S314T	1	0.995996	1	Train
Q341H	1	0.989294	1	Train
D282V	1	0.999701	1	Train
R214W	1	0.999739	1	Train
E119G	1	0.973692	1	Train
V224A	1	0.978428	1	Train
S352P	1	0.997656	1	Train
C242G	1	0.999269	1	Train
I582F	1	0.999372	1	Train
R144W	1	0.981262	1	Train
A348T	1	0.998474	1	Train
K583N	1	0.999372	1	Train
Y363H	1	0.979107	1	Train
M578I	1	0.999372	1	Train
T234P	1	0.999701	1	Train
A246P	1	0.999372	1	Train
R395G	1	0.950589	1	Train
G271V	1	0.999739	1	Train
P308L	1	0.998474	1	Train
I311M	1	0.999125	1	Train
P561L	1	0.992739	1	Train
A265G	1	0.999254	1	Train
H260Y	1	0.989074	1	Train
M565T	1	0.704752	1	Train
L351F	1	0.9512	1	Train
L637R	1	0.966624	1	Train
G216V	1	0.999739	1	Train
G256R	1	0.612222	1	Train
N190I	1	0.998893	1	Train
W344R	1	0.998474	1	Train
R214Q	1	0.999372	1	Train
R353G	1	0.979107	1	Train
E231Q	1	0.995996	1	Train
M1I	1	0.95743	1	Train
I278T	1	0.991584	1	Train
L356Q	1	0.998474	1	Train
Y362C	1	0.999125	1	Train
A196V	1	0.996025	1	Train
Q204R	1	0.999372	1	Train
I340M	1	0.998474	1	Train
I340T	1	0.998474	1	Train
L351V	1	0.9512	1	Train
D282H	1	0.999269	1	Train
Q204H	1	0.999372	1	Train
A265T	1	0.999254	1	Train
H324R	1	0.984441	1	Train
M546T	1	0.845284	1	Train
R332K	1	0.998474	1	Train
V132M	1	0.999059	1	Train
E231G	1	0.995996	1	Train
R588S	1	0.999269	1	Train
S195P	1	0.999064	1	Train
L243V	1	0.999255	1	Train
V250L	1	0.999372	1	Train
E231D	1	0.995996	1	Train
G290V	1	0.99969	1	Train
S229I	1	0.998123	1	Train
N350H	1	0.973158	1	Train
M1V	1	0.95743	1	Train
W269L	1	0.999372	1	Train
G315A	1	0.998316	1	Train
F304S	1	0.999254	1	Train
Q188K	1	0.999125	1	Train
S247W	1	0.999739	1	Train
R291S	1	0.999269	1	Train
I209T	1	0.999372	1	Train
D488E	1	0.624435	1	Train
G281W	1	0.999633	1	Train
F104S	1	0.950589	1	Train
R541G	1	0.961624	1	Train
V250G	1	0.999372	1	Train
K554N	1	0.979107	1	Train
Y284C	1	0.99929	1	Train
D259Y	1	0.963121	1	Train
R291G	1	0.999269	1	Train
G290D	1	0.999254	1	Train
L203P	1	0.999372	1	Train
P561R	1	0.992739	1	Train
I273N	1	0.999254	1	Train
A235V	1	0.999125	1	Train
K556E	1	0.999125	1	Train
P285S	1	0.999372	1	Train
G271D	1	0.999372	1	Train
T716I	1	0.960746	1	Train
T234A	1	0.999701	1	Train
D563Y	1	0.995739	1	Train
G222D	1	0.995748	1	Train
T217A	1	0.999739	1	Train
P285H	1	0.999372	1	Train
P335L	1	0.999125	1	Train
D563N	1	0.950589	1	Train
V175L	1	0.808773	1	Train
D212A	1	0.999739	1	Train
R353C	1	0.979107	1	Train
W269S	1	0.999372	1	Train
D282E	1	0.999269	1	Train
A306T	1	0.9992	1	Train
T276P	1	0.999633	1	Train
A501P	1	0.634453	1	Train
F261C	1	0.995907	1	Train
I568T	1	0.997501	1	Train
R213Q	1	0.999372	1	Train
T359K	1	0.999125	1	Train
L245P	1	0.999372	1	Train
S195F	1	0.999064	1	Train
N350I	1	0.997052	1	Train
I205V	1	0.999372	1	Train
E140Q	1	0.773034	1	Train
P335A	1	0.999125	1	Train
G301V	1	0.999695	1	Train
H228Q	1	0.979065	1	Train
G256W	1	0.993993	1	Train
I340N	1	0.998474	1	Train
V182M	1	0.992103	1	Train
G256V	1	0.993993	1	Train
Y154D	1	0.961624	1	Train
Y363C	1	0.979107	1	Train
K283R	1	0.999254	1	Train
A337T	1	0.999269	1	Train
R325G	1	0.995835	1	Train
I592M	1	0.974875	1	Train
G189V	1	0.999566	1	Train
G313R	1	0.995479	1	Train
L206R	1	0.999372	1	Train
D266E	1	0.999372	1	Train
T114A	1	0.910763	1	Train
L292P	1	0.999125	1	Train
M1K	1	0.95743	1	Train
G215R	1	0.999372	1	Train
D355G	1	0.998474	1	Train
N258I	1	0.979896	1	Train
F305L	1	0.999269	1	Train
L356R	1	0.998474	1	Train
L356V	1	0.998474	1	Train
H96P	1	0.991989	1	Train
L268P	1	0.999372	1	Train
T296P	1	0.958265	1	Train
R213L	1	0.999739	1	Train
A265P	1	0.999254	1	Train
S122L	1	0.99716	1	Train
L197P	1	0.998474	1	Train
N258S	1	0.685383	1	Train
W218R	1	0.999372	1	Train
T277A	1	0.999044	1	Train
R560W	1	0.998123	1	Train
G239R	1	0.979107	1	Train
T857I	0	0.00061241	0	Train
R604H	0	0.00642998	0	Train
R854C	0	0.000350107	0	Train
P848L	0	0.000350107	0	Train
A703V	0	0.000434577	0	Train
F527I	0	0.00642998	0	Train
P29S	0	0.000463225	0	Train
P370L	0	0.00674689	0	Train
D675E	0	0.000463225	0	Train
V367I	0	0.00642998	0	Train
A611T	0	0.00907344	0	Train
R489G	0	0.00907344	0	Train
A64S	0	0.00033797	0	Train
P652R	0	0.00033797	0	Train
D470N	0	0.00907344	0	Train
A754T	0	0.000350107	0	Train
V690M	0	0.000350107	0	Train
R782Q	0	0.00033797	0	Train
P617S	0	0.1617	0	Train
V793L	0	0.000994458	0	Train
P651R	0	0.00033797	0	Train
A707T	0	0.000434577	0	Train
A502V	0	0.00907344	0	Train
V139M	0	0.0312567	0	Train
E515D	0	0.00642998	0	Train
V593M	0	0.107518	0	Train
I689L	0	0.00033797	0	Train
A657T	0	0.000434577	0	Train
A404T	0	0.00907344	0	Train
G30S	0	0.000463225	0	Train
H795N	0	0.0063544	0	Train
G858S	0	0.00033797	0	Train
G624R	0	0.0229502	0	Train
R725C	0	0.00033797	0	Train
P668L	0	0.00033797	0	Train
P411L	0	0.00642998	0	Train
R760H	0	0.00033797	0	Train
P652L	0	0.00033797	0	Train
A822T	0	0.00102126	0	Train
A62V	0	0.00033797	0	Train
G697S	0	0.00033797	0	Train
T605S	0	0.00642998	0	Train
P424S	0	0.0312567	0	Train
Y755C	0	0.000350107	0	Train
P777R	0	0.000434577	0	Train
D520G	0	0.0165565	0	Train
Y658C	0	0.000434577	0	Train
P724L	0	0.000463225	0	Train
P664L	0	0.00033797	0	Train
I517V	0	0.00642998	0	Train
I177V	0	0.0853224	0	Train
F659S	0	0.000350107	0	Train
N780T	0	0.000434577	0	Train
I686V	0	0.000463225	0	Train
P410L	0	0.00642998	0	Train
C849F	0	0.00061241	0	Train
P772R	0	0.000350107	0	Train
R767Q	0	0.000463225	0	Train
G8S	0	0.000915024	0	Train
T696M	0	0.000474466	0	Train
R647Q	0	0.00737621	0	Train
E778K	0	0.000434577	0	Train
Q3E	0	0.00522742	0	Train
G8R	0	0.000915024	0	Train
G16E	0	0.000709287	0	Train
L20V	0	0.0109196	0	Train
V25M	0	0.00102126	0	Train
G26E	0	0.000994458	0	Train
G30A	0	0.000586601	0	Train
S34F	0	0.00425457	0	Train
T35S	0	0.00480149	0	Train
I53T	0	0.00200471	0	Train
P57S	0	0.000463225	0	Train
R58C	0	0.000463225	0	Train
G60A	0	0.000586601	0	Train
P67S	0	0.000463225	0	Train
P67A	0	0.000463225	0	Train
R75H	0	0.0100654	0	Train
Q78K	0	0.0782381	0	Train
W91G	0	0.13958	0	Train
V108M	0	0.459609	0	Train
K116R	0	0.00907344	0	Train
E117D	0	0.00907344	0	Train
E117G	0	0.00907344	0	Train
F142L	0	0.0281744	0	Train
V143L	0	0.0897343	0	Train
R160Q	0	0.090996	0	Train
K162R	0	0.0256118	0	Train
R165W	0	0.00704484	0	Train
P167L	0	0.0256118	0	Train
L176V	0	0.124727	0	Train
V225I	0	0.147633	0	Train
G256E	1	0.612222	0	Train
D259H	0	0.0711441	0	Train
D259N	0	0.0711441	0	Train
A295S	0	0.090996	0	Train
H357R	0	0.112768	0	Train
R365Q	0	0.00907344	0	Train
V367A	0	0.00642998	0	Train
T368N	0	0.00674689	0	Train
V369M	0	0.00674689	0	Train
M371V	0	0.00642998	0	Train
Q375E	0	0.00907344	0	Train
G380A	0	0.0165067	0	Train
G380R	0	0.0281744	0	Train
I385L	0	0.0229502	0	Train
P387R	0	0.0163336	0	Train
S399G	0	0.128533	0	Train
L403F	0	0.0251791	0	Train
D408E	0	0.00907344	0	Train
D408V	0	0.0031307	0	Train
P411Q	0	0.00642998	0	Train
P413L	0	0.0172105	0	Train
G418A	0	0.0031307	0	Train
P420L	0	0.00907344	0	Train
P424L	0	0.0312567	0	Train
G431R	0	0.00642998	0	Train
R432H	0	0.00642998	0	Train
Q435R	0	0.00907344	0	Train
D441G	0	0.00907344	0	Train
R442C	0	0.00907344	0	Train
A451V	0	0.00642998	0	Train
S457F	0	0.0024547	0	Train
Q461P	0	0.0031307	0	Train
R465Q	0	0.00907344	0	Train
R465W	0	0.0031307	0	Train
A469T	0	0.00907344	0	Train
E474K	0	0.0256118	0	Train
S478G	0	0.0711441	0	Train
R489H	0	0.00907344	0	Train
R493H	0	0.00907344	0	Train
R497C	0	0.00737621	0	Train
I498L	0	0.00674689	0	Train
K499R	0	0.00642998	0	Train
A502T	0	0.00907344	0	Train
R504Q	0	0.00907344	0	Train
E509A	0	0.0840663	0	Train
G514R	0	0.00642998	0	Train
S522N	0	0.0165565	0	Train
C523Y	0	0.0031307	0	Train
C525S	0	0.00642998	0	Train
E526Q	0	0.00642998	0	Train
L532P	0	0.044408	0	Train
K537R	0	0.0256118	0	Train
V538I	0	0.165521	0	Train
V543M	0	0.0570615	0	Train
V545I	0	0.044408	0	Train
V564L	0	0.090996	0	Train
A598V	0	0.00907344	0	Train
T600M	0	0.0024547	0	Train
D601N	0	0.00642998	0	Train
T605I	0	0.0024547	0	Train
P608L	0	0.00907344	0	Train
A611V	0	0.00907344	0	Train
R622W	0	0.136922	0	Train
G624W	0	0.00689644	0	Train
M633T	0	0.0165565	0	Train
M633V	0	0.0165565	0	Train
E634Q	0	0.0172105	0	Train
K635N	0	0.0853224	0	Train
L640M	0	0.0256118	0	Train
Q646R	0	0.00674689	0	Train
R647W	0	0.00292617	0	Train
G649V	0	0.000493392	0	Train
G649A	0	0.000493392	0	Train
E654V	0	0.000474466	0	Train
E656D	0	0.000350107	0	Train
E656K	0	0.000350107	0	Train
G660R	0	0.00033797	0	Train
G660V	0	0.000474466	0	Train
E663G	0	0.00033797	0	Train
P664T	0	0.00033797	0	Train
P666L	0	0.000350107	0	Train
P666Q	0	0.000350107	0	Train
A667V	0	0.000350107	0	Train
R677Q	0	0.000463225	0	Train
R677W	0	0.000586601	0	Train
V680G	0	0.000463225	0	Train
H683R	0	0.00372634	0	Train
G684S	0	0.000463225	0	Train
I689F	0	0.00033797	0	Train
R691C	0	0.00033797	0	Train
S694T	0	0.000866852	0	Train
N700K	0	0.00033797	0	Train
S702L	0	0.000493392	0	Train
P704L	0	0.000434577	0	Train
P705L	0	0.000434577	0	Train
A706D	0	0.000434577	0	Train
A707V	0	0.000434577	0	Train
P713A	0	0.00188848	0	Train
P714H	0	0.00200471	0	Train
P724S	0	0.000463225	0	Train
G727S	0	0.00033797	0	Train
T730A	0	0.000586601	0	Train
S731A	0	0.000586601	0	Train
P732S	0	0.000463225	0	Train
R741L	0	0.000586601	0	Train
P743L	0	0.000463225	0	Train
P745L	0	0.000463225	0	Train
H748Q	0	0.00372634	0	Train
R760C	0	0.00033797	0	Train
R767W	0	0.000586601	0	Train
Q768R	0	0.000463225	0	Train
P772A	0	0.000350107	0	Train
P777S	0	0.000434577	0	Train
E778V	0	0.00061241	0	Train
G779R	0	0.000434577	0	Train
L781P	0	0.000434577	0	Train
R782W	0	0.000474466	0	Train
S789T	0	0.00127542	0	Train
E796K	0	0.00190787	0	Train
K811R	0	0.00124466	0	Train
D815E	0	0.00522742	0	Train
A822V	0	0.00102126	0	Train
K829E	0	0.000546472	0	Train
A835V	0	0.00188848	0	Train
E838G	0	0.0358389	0	Train
C846R	0	0.000463225	0	Train
G850R	0	0.000350107	0	Train
P852L	0	0.00033797	0	Train
R854H	0	0.000350107	0	Train
S855L	0	0.00061241	0	Train
T857A	0	0.00061241	0	Train
V865M	0	0.0070062	0	Train
V865G	0	0.0070062	0	Train
G869E	0	0.000463225	0	Train
R871S	0	0.00033797	0	Train
R871G	0	0.00033797	0	Train
G290S	1	0.999254	1	Test
R581G	1	0.999372	1	Test
S303C	1	0.99929	1	Test
S247L	1	0.999739	1	Test
A253S	1	0.9992	1	Test
D563G	1	0.950589	1	Test
L241P	1	0.999125	1	Test
V135M	0	0.107518	0	Test
L339Q	1	0.999125	1	Test
T359A	1	0.999633	1	Test
S374L	0	0.0024547	0	Test
P458S	0	0.00642998	0	Test
P708A	0	0.00033797	0	Test
M1T	1	0.95743	1	Test
A337G	1	0.999269	1	Test
D212E	1	0.999372	1	Test
G737S	0	0.000463225	0	Test
A828V	0	0.000994458	0	Test
D675N	0	0.000463225	0	Test
R432C	0	0.00642998	0	Test
D212G	1	0.999372	1	Test
A611S	0	0.00907344	0	Test
E254A	1	0.999633	1	Test
T771I	0	0.000493392	0	Test
R210H	1	0.999372	1	Test
G315R	1	0.995996	1	Test
N396S	0	0.128533	0	Test
V143M	0	0.0897343	0	Test
A306P	1	0.9992	1	Test
G756S	0	0.000350107	0	Test
T276I	1	0.999633	1	Test
G574D	1	0.999372	1	Test
Y280H	1	0.999125	1	Test
V103D	1	0.979107	1	Test
S358F	1	0.999633	1	Test
Q188P	1	0.999633	1	Test
L293P	1	0.998474	1	Test
Y284D	1	0.99929	1	Test
R210C	1	0.999372	1	Test
Y154H	1	0.961624	1	Test
V450M	0	0.00674689	0	Test
W270R	1	0.999372	1	Test
P308S	1	0.998474	1	Test
A761S	0	0.00033797	0	Test
Y237C	1	0.979107	1	Test
R333W	1	0.999247	1	Test
G281R	1	0.999125	1	Test
F261S	1	0.995907	1	Test
K327M	1	0.998316	1	Test
D282N	1	0.999269	1	Test
T194P	1	0.998802	1	Test
F496I	0	0.00737621	0	Test
R581Q	1	0.999372	1	Test
G159E	1	0.950589	1	Test
R332G	1	0.998474	1	Test
A495P	0	0.00674689	0	Test
S751L	0	0.000586601	0	Test
S187Y	1	0.999701	1	Test
T274M	1	0.999701	1	Test
D563E	1	0.950589	1	Test
V567D	1	0.599898	1	Test
T277I	1	0.999044	1	Test
Y237F	1	0.979107	1	Test
R691H	0	0.00033797	0	Test
P772L	0	0.000350107	0	Test
M578V	1	0.999372	1	Test
H228Y	1	0.982254	1	Test
L339R	1	0.999125	1	Test
P776H	0	0.000434577	0	Test
A306V	1	0.9992	1	Test
F261I	1	0.995907	1	Test
A43V	0	0.00427386	0	Test
R198Q	1	0.999125	1	Test
A97V	1	0.685383	0	Test
R581L	1	0.999739	1	Test
G869R	0	0.000463225	0	Test
R353H	1	0.979107	1	Test
G315E	1	0.995996	1	Test
L107F	1	0.969012	1	Test
A309V	1	0.998474	1	Test
D355E	1	0.998474	1	Test
H228R	1	0.979065	1	Test
G418V	0	0.0031307	0	Test
R604C	0	0.00642998	0	Test
R504W	0	0.0031307	1	Test
R800H	0	0.00522742	0	Test
H96N	1	0.908826	1	Test
R560Q	1	0.995479	1	Test
G279C	1	0.992103	1	Test

## Sheet: Gaussian Process
Variant	Prediction	Score	Label	Group
G310S	1	0.89491	1	Train	1	0	0
A253T	1	0.935658	1	Train	1	0	0
L243F	1	0.818778	1	Train	1	0	0
R547W	1	0.593073	1	Train	1	0	0
L268F	1	0.950414	1	Train	1	0	0
D282Y	1	0.936535	1	Train	1	0	0
R201C	1	0.948773	1	Train	1	0	0
R207W	1	0.939187	1	Train	1	0	0
P88L	1	0.731968	1	Train	1	0	0
M208V	1	0.711317	1	Train	1	0	0
P335R	1	0.853066	1	Train	1	0	0
Y284H	1	0.949903	1	Train	1	0	0
N79K	1	0.547327	1	Train	1	0	0
Y264N	1	0.947553	1	Train	1	0	0
L81P	1	0.738179	1	Train	1	0	0
R333Q	1	0.853969	1	Train	1	0	0
G159R	1	0.743241	1	Train	1	0	0
A193D	1	0.846826	1	Train	1	0	0
R553Q	1	0.704315	1	Train	1	0	0
M546V	1	0.670748	1	Train	1	0	0
R144Q	0	0.430115	1	Train	0	0	0
G301S	1	0.947816	1	Train	1	0	0
R553L	1	0.845687	1	Train	1	0	0
T263I	1	0.935368	1	Train	1	0	0
G301D	1	0.947816	1	Train	1	0	0
R201H	1	0.948773	1	Train	1	0	0
T276N	1	0.901751	1	Train	1	0	0
K552T	1	0.656277	1	Train	1	0	0
A294V	1	0.752812	1	Train	1	0	0
S223P	1	0.730794	1	Train	1	0	0
R553W	1	0.845687	1	Train	1	0	0
P561S	1	0.688956	1	Train	1	0	0
N190S	1	0.833814	1	Train	1	0	0
L161P	0	0.428442	1	Train	0	0	0
F555L	1	0.883404	1	Train	1	0	0
R210P	1	0.939187	1	Train	1	0	0
A294G	1	0.752812	1	Train	1	0	0
G279S	1	0.857446	1	Train	1	0	0
E130K	1	0.910697	1	Train	1	0	0
T234I	1	0.746811	1	Train	1	0	0
W269C	1	0.950414	1	Train	1	0	0
C169R	1	0.808862	1	Train	1	0	0
K319T	1	0.798119	1	Train	1	0	0
R207Q	1	0.950414	1	Train	1	0	0
T114I	1	0.614098	1	Train	1	0	0
A343G	1	0.8528	1	Train	1	0	0
S113F	1	0.832833	1	Train	1	0	0
V320I	1	0.798119	1	Train	1	0	0
T287A	1	0.939183	1	Train	1	0	0
T277S	1	0.857446	1	Train	1	0	0
A265V	1	0.949722	1	Train	1	0	0
L200P	1	0.945017	1	Train	1	0	0
T287N	1	0.950403	1	Train	1	0	0
A185T	1	0.946908	1	Train	1	0	0
D212Y	1	0.939187	1	Train	1	0	0
V589G	1	0.938555	1	Train	1	0	0
P285T	1	0.950314	1	Train	1	0	0
D566H	1	0.66342	1	Train	1	0	0
R213W	1	0.939187	1	Train	1	0	0
S314T	1	0.792441	1	Train	1	0	0
Q341H	1	0.852817	1	Train	1	0	0
D282V	1	0.936535	1	Train	1	0	0
R214W	1	0.939187	1	Train	1	0	0
E119G	1	0.701931	1	Train	1	0	0
V224A	1	0.596209	1	Train	1	0	0
S352P	1	0.844667	1	Train	1	0	0
C242G	1	0.819112	1	Train	1	0	0
I582F	1	0.950414	1	Train	1	0	0
R144W	1	0.721726	1	Train	1	0	0
A348T	1	0.854021	1	Train	1	0	0
K583N	1	0.950414	1	Train	1	0	0
Y363H	1	0.605504	1	Train	1	0	0
M578I	1	0.711317	1	Train	1	0	0
T234P	1	0.746811	1	Train	1	0	0
A246P	1	0.818454	1	Train	1	0	0
R395G	1	0.722827	1	Train	1	0	0
G271V	1	0.93915	1	Train	1	0	0
P308L	1	0.89491	1	Train	1	0	0
I311M	1	0.919165	1	Train	1	0	0
P561L	1	0.688956	1	Train	1	0	0
A265G	1	0.949722	1	Train	1	0	0
H260Y	1	0.86239	1	Train	1	0	0
M565T	1	0.710019	1	Train	1	0	0
L351F	1	0.644505	1	Train	1	0	0
L637R	0	0.359566	1	Train	0	0	0
G216V	1	0.939187	1	Train	1	0	0
G256R	1	0.783594	1	Train	1	0	0
N190I	1	0.893786	1	Train	1	0	0
W344R	1	0.854054	1	Train	1	0	0
R214Q	1	0.950414	1	Train	1	0	0
R353G	1	0.802685	1	Train	1	0	0
E231Q	1	0.795976	1	Train	1	0	0
M1I	1	0.685145	1	Train	1	0	0
I278T	1	0.83211	1	Train	1	0	0
L356Q	1	0.896397	1	Train	1	0	0
Y362C	1	0.618172	1	Train	1	0	0
A196V	1	0.864872	1	Train	1	0	0
Q204R	1	0.950402	1	Train	1	0	0
I340M	1	0.854042	1	Train	1	0	0
I340T	1	0.854042	1	Train	1	0	0
L351V	1	0.644505	1	Train	1	0	0
D282H	1	0.943451	1	Train	1	0	0
Q204H	1	0.950402	1	Train	1	0	0
A265T	1	0.949722	1	Train	1	0	0
H324R	1	0.798119	1	Train	1	0	0
M546T	1	0.670748	1	Train	1	0	0
R332K	1	0.854072	1	Train	1	0	0
V132M	1	0.898075	1	Train	1	0	0
E231G	1	0.795976	1	Train	1	0	0
R588S	1	0.947046	1	Train	1	0	0
S195P	1	0.904859	1	Train	1	0	0
L243V	1	0.818778	1	Train	1	0	0
V250L	1	0.818505	1	Train	1	0	0
E231D	1	0.795976	1	Train	1	0	0
G290V	1	0.938418	1	Train	1	0	0
S229I	1	0.774854	1	Train	1	0	0
N350H	1	0.845997	1	Train	1	0	0
M1V	1	0.685145	1	Train	1	0	0
W269L	1	0.950414	1	Train	1	0	0
G315A	1	0.783619	1	Train	1	0	0
F304S	1	0.948861	1	Train	1	0	0
Q188K	1	0.927391	1	Train	1	0	0
S247W	1	0.746498	1	Train	1	0	0
R291S	1	0.94289	1	Train	1	0	0
I209T	1	0.950414	1	Train	1	0	0
D488E	0	0.136491	1	Train	0	0	0
G281W	1	0.931351	1	Train	1	0	0
F104S	1	0.511809	1	Train	1	0	0
R541G	1	0.765217	1	Train	1	0	0
V250G	1	0.818505	1	Train	1	0	0
K554N	1	0.799886	1	Train	1	0	0
Y284C	1	0.949903	1	Train	1	0	0
D259Y	1	0.817657	1	Train	1	0	0
R291G	1	0.94289	1	Train	1	0	0
G290D	1	0.948341	1	Train	1	0	0
L203P	1	0.950335	1	Train	1	0	0
P561R	1	0.688956	1	Train	1	0	0
I273N	1	0.948332	1	Train	1	0	0
A235V	1	0.818311	1	Train	1	0	0
K556E	1	0.925472	1	Train	1	0	0
P285S	1	0.950314	1	Train	1	0	0
G271D	1	0.950314	1	Train	1	0	0
T716I	1	0.639839	1	Train	1	0	0
T234A	1	0.746811	1	Train	1	0	0
D563Y	1	0.850196	1	Train	1	0	0
G222D	1	0.740813	1	Train	1	0	0
T217A	1	0.939182	1	Train	1	0	0
P285H	1	0.950314	1	Train	1	0	0
P335L	1	0.853066	1	Train	1	0	0
D563N	1	0.716228	1	Train	1	0	0
V175L	0	0.444392	1	Train	0	0	0
D212A	1	0.939187	1	Train	1	0	0
R353C	1	0.802685	1	Train	1	0	0
W269S	1	0.950414	1	Train	1	0	0
D282E	1	0.943451	1	Train	1	0	0
A306T	1	0.936685	1	Train	1	0	0
T276P	1	0.919775	1	Train	1	0	0
A501P	0	0.0457466	1	Train	0	0	0
F261C	1	0.863475	1	Train	1	0	0
I568T	1	0.867119	1	Train	1	0	0
R213Q	1	0.950414	1	Train	1	0	0
T359K	1	0.620012	1	Train	1	0	0
L245P	1	0.818469	1	Train	1	0	0
S195F	1	0.904859	1	Train	1	0	0
N350I	1	0.643631	1	Train	1	0	0
I205V	1	0.950414	1	Train	1	0	0
E140Q	0	0.297139	1	Train	0	0	0
P335A	1	0.853066	1	Train	1	0	0
G301V	1	0.93822	1	Train	1	0	0
H228Q	1	0.740813	1	Train	1	0	0
G256W	1	0.875229	1	Train	1	0	0
I340N	1	0.854042	1	Train	1	0	0
V182M	1	0.856585	1	Train	1	0	0
G256V	1	0.875229	1	Train	1	0	0
Y154D	1	0.761057	1	Train	1	0	0
Y363C	1	0.605504	1	Train	1	0	0
K283R	1	0.948332	1	Train	1	0	0
A337T	1	0.848235	1	Train	1	0	0
R325G	1	0.798071	1	Train	1	0	0
I592M	1	0.683914	1	Train	1	0	0
G189V	1	0.915963	1	Train	1	0	0
G313R	1	0.779869	1	Train	1	0	0
L206R	1	0.950414	1	Train	1	0	0
D266E	1	0.950279	1	Train	1	0	0
T114A	1	0.614098	1	Train	1	0	0
L292P	1	0.925975	1	Train	1	0	0
M1K	1	0.685145	1	Train	1	0	0
G215R	1	0.950414	1	Train	1	0	0
D355G	1	0.893106	1	Train	1	0	0
N258I	1	0.80846	1	Train	1	0	0
F305L	1	0.945382	1	Train	1	0	0
L356R	1	0.896397	1	Train	1	0	0
L356V	1	0.896397	1	Train	1	0	0
H96P	1	0.583893	1	Train	1	0	0
L268P	1	0.950414	1	Train	1	0	0
T296P	1	0.799255	1	Train	1	0	0
R213L	1	0.939187	1	Train	1	0	0
A265P	1	0.949722	1	Train	1	0	0
S122L	1	0.890942	1	Train	1	0	0
L197P	1	0.886786	1	Train	1	0	0
N258S	1	0.61036	1	Train	1	0	0
W218R	1	0.950327	1	Train	1	0	0
T277A	1	0.902648	1	Train	1	0	0
R560W	1	0.76741	1	Train	1	0	0
G239R	1	0.804413	1	Train	1	0	0
T857I	0	0.0906782	0	Train	1	0	0
R604H	0	0.0432332	0	Train	1	0	0
R854C	0	0.0261053	0	Train	1	0	0
P848L	0	0.0272752	0	Train	1	0	0
A703V	0	0.0362642	0	Train	1	0	0
F527I	0	0.041351	0	Train	1	0	0
P29S	0	0.0289083	0	Train	1	0	0
P370L	0	0.0429693	0	Train	1	0	0
D675E	0	0.0285847	0	Train	1	0	0
V367I	0	0.0422558	0	Train	1	0	0
A611T	0	0.0634416	0	Train	1	0	0
R489G	0	0.100915	0	Train	1	0	0
A64S	0	0.0212376	0	Train	1	0	0
P652R	0	0.0212457	0	Train	1	0	0
D470N	0	0.0701757	0	Train	1	0	0
A754T	0	0.0224125	0	Train	1	0	0
V690M	0	0.0235156	0	Train	1	0	0
R782Q	0	0.0203952	0	Train	1	0	0
P617S	1	0.639879	0	Train	0	0	0
V793L	0	0.0558513	0	Train	1	0	0
P651R	0	0.0219695	0	Train	1	0	0
A707T	0	0.0346039	0	Train	1	0	0
A502V	0	0.0458579	0	Train	1	0	0
V139M	0	0.396503	0	Train	1	0	0
E515D	0	0.0410205	0	Train	1	0	0
V593M	1	0.529401	0	Train	0	0	0
I689L	0	0.0217854	0	Train	1	0	0
A657T	0	0.0300088	0	Train	1	0	0
A404T	0	0.107459	0	Train	1	0	0
G30S	0	0.0339648	0	Train	1	0	0
H795N	0	0.0567039	0	Train	1	0	0
G858S	0	0.0215133	0	Train	1	0	0
G624R	0	0.289005	0	Train	1	0	0
R725C	0	0.0204854	0	Train	1	0	0
P668L	0	0.0203985	0	Train	1	0	0
P411L	0	0.0413747	0	Train	1	0	0
R760H	0	0.0215291	0	Train	1	0	0
P652L	0	0.0212457	0	Train	1	0	0
A822T	0	0.0828113	0	Train	1	0	0
A62V	0	0.0210081	0	Train	1	0	0
G697S	0	0.0203946	0	Train	1	0	0
T605S	0	0.0450004	0	Train	1	0	0
P424S	0	0.343522	0	Train	1	0	0
Y755C	0	0.0265006	0	Train	1	0	0
P777R	0	0.076115	0	Train	1	0	0
D520G	0	0.15228	0	Train	1	0	0
Y658C	0	0.0307608	0	Train	1	0	0
P724L	0	0.0246065	0	Train	1	0	0
P664L	0	0.0214616	0	Train	1	0	0
I517V	0	0.0441328	0	Train	1	0	0
I177V	0	0.224126	0	Train	1	0	0
F659S	0	0.0240682	0	Train	1	0	0
N780T	0	0.0628932	0	Train	1	0	0
I686V	0	0.0229735	0	Train	1	0	0
P410L	0	0.0406057	0	Train	1	0	0
C849F	0	0.094195	0	Train	1	0	0
P772R	0	0.0283189	0	Train	1	0	0
R767Q	0	0.0274831	0	Train	1	0	0
G8S	0	0.0599061	0	Train	1	0	0
T696M	0	0.0894314	0	Train	1	0	0
R647Q	0	0.286906	0	Train	1	0	0
E778K	0	0.0977754	0	Train	1	0	0
Q3E	0	0.225594	0	Train	1	0	0
G8R	0	0.0599061	0	Train	1	0	0
G16E	0	0.0648133	0	Train	1	0	0
L20V	0	0.256234	0	Train	1	0	0
V25M	0	0.0887475	0	Train	1	0	0
G26E	0	0.0528578	0	Train	1	0	0
G30A	0	0.162973	0	Train	1	0	0
S34F	0	0.377436	0	Train	1	0	0
T35S	0	0.17381	0	Train	1	0	0
I53T	0	0.106522	0	Train	1	0	0
P57S	0	0.0367788	0	Train	1	0	0
R58C	0	0.0304365	0	Train	1	0	0
G60A	0	0.13505	0	Train	1	0	0
P67S	0	0.0228977	0	Train	1	0	0
P67A	0	0.0228977	0	Train	1	0	0
R75H	0	0.29438	0	Train	1	0	0
Q78K	0	0.433519	0	Train	1	0	0
W91G	1	0.509539	0	Train	0	0	0
V108M	1	0.511667	0	Train	0	0	0
K116R	0	0.0743684	0	Train	1	0	0
E117D	0	0.112958	0	Train	1	0	0
E117G	0	0.112958	0	Train	1	0	0
F142L	0	0.175103	0	Train	1	0	0
V143L	0	0.220881	0	Train	1	0	0
R160Q	1	0.591809	0	Train	0	0	0
K162R	0	0.318406	0	Train	1	0	0
R165W	0	0.46937	0	Train	1	0	0
P167L	0	0.300968	0	Train	1	0	0
L176V	0	0.28446	0	Train	1	0	0
V225I	1	0.559119	0	Train	0	0	0
G256E	1	0.783594	0	Train	0	0	0
D259H	1	0.632743	0	Train	0	0	0
D259N	1	0.632743	0	Train	0	0	0
A295S	1	0.605061	0	Train	0	0	0
H357R	1	0.616352	0	Train	0	0	0
R365Q	1	0.52214	0	Train	0	0	0
V367A	0	0.0422558	0	Train	1	0	0
T368N	0	0.0484175	0	Train	1	0	0
V369M	0	0.0479245	0	Train	1	0	0
M371V	1	0.541146	0	Train	0	0	0
Q375E	0	0.0510227	0	Train	1	0	0
G380A	0	0.495548	0	Train	1	0	0
G380R	0	0.170062	0	Train	1	0	0
I385L	0	0.164703	0	Train	1	0	0
P387R	0	0.12206	0	Train	1	0	0
S399G	1	0.569851	0	Train	0	0	0
L403F	0	0.168328	0	Train	1	0	0
D408E	0	0.0558122	0	Train	1	0	0
D408V	0	0.239326	0	Train	1	0	0
P411Q	0	0.0413747	0	Train	1	0	0
P413L	0	0.125182	0	Train	1	0	0
G418A	0	0.275523	0	Train	1	0	0
P420L	0	0.0590739	0	Train	1	0	0
P424L	0	0.343522	0	Train	1	0	0
G431R	0	0.0410231	0	Train	1	0	0
R432H	0	0.0405276	0	Train	1	0	0
Q435R	0	0.103148	0	Train	1	0	0
D441G	0	0.0619806	0	Train	1	0	0
R442C	0	0.101368	0	Train	1	0	0
A451V	0	0.0417498	0	Train	1	0	0
S457F	0	0.186169	0	Train	1	0	0
Q461P	0	0.272768	0	Train	1	0	0
R465Q	0	0.0958271	0	Train	1	0	0
R465W	0	0.35923	0	Train	1	0	0
A469T	0	0.0769649	0	Train	1	0	0
E474K	0	0.301537	0	Train	1	0	0
S478G	1	0.638572	0	Train	0	0	0
R489H	0	0.100915	0	Train	1	0	0
R493H	0	0.048693	0	Train	1	0	0
R497C	0	0.057357	0	Train	1	0	0
I498L	0	0.0464317	0	Train	1	0	0
K499R	0	0.040396	0	Train	1	0	0
A502T	0	0.0458579	0	Train	1	0	0
R504Q	0	0.0521928	0	Train	1	0	0
E509A	1	0.52501	0	Train	0	0	0
G514R	0	0.0425507	0	Train	1	0	0
S522N	0	0.149969	0	Train	1	0	0
C523Y	0	0.382995	0	Train	1	0	0
C525S	0	0.0449073	0	Train	1	0	0
E526Q	0	0.0410013	0	Train	1	0	0
L532P	0	0.186813	0	Train	1	0	0
K537R	0	0.336479	0	Train	1	0	0
V538I	0	0.443377	0	Train	1	0	0
V543M	0	0.422101	0	Train	1	0	0
V545I	0	0.18452	0	Train	1	0	0
V564L	1	0.588594	0	Train	0	0	0
A598V	0	0.0502464	0	Train	1	0	0
T600M	0	0.172529	0	Train	1	0	0
D601N	0	0.0430534	0	Train	1	0	0
T605I	0	0.191673	0	Train	1	0	0
P608L	0	0.0711592	0	Train	1	0	0
A611V	0	0.0634416	0	Train	1	0	0
R622W	0	0.322024	0	Train	1	0	0
G624W	0	0.308187	0	Train	1	0	0
M633T	0	0.357137	0	Train	1	0	0
M633V	0	0.357137	0	Train	1	0	0
E634Q	0	0.282776	0	Train	1	0	0
K635N	0	0.299172	0	Train	1	0	0
L640M	0	0.313042	0	Train	1	0	0
Q646R	0	0.275659	0	Train	1	0	0
R647W	0	0.336172	0	Train	1	0	0
G649V	0	0.0865315	0	Train	1	0	0
G649A	0	0.0865315	0	Train	1	0	0
E654V	0	0.0909925	0	Train	1	0	0
E656D	0	0.0237189	0	Train	1	0	0
E656K	0	0.0237189	0	Train	1	0	0
G660R	0	0.0204136	0	Train	1	0	0
G660V	0	0.0899957	0	Train	1	0	0
E663G	0	0.0203943	0	Train	1	0	0
P664T	0	0.0214616	0	Train	1	0	0
P666L	0	0.0238099	0	Train	1	0	0
P666Q	0	0.0238099	0	Train	1	0	0
A667V	0	0.0223898	0	Train	1	0	0
R677Q	0	0.0229057	0	Train	1	0	0
R677W	0	0.112739	0	Train	1	0	0
V680G	0	0.0375395	0	Train	1	0	0
H683R	0	0.0279746	0	Train	1	0	0
G684S	0	0.0232398	0	Train	1	0	0
I689F	0	0.0217854	0	Train	1	0	0
R691C	0	0.0214495	0	Train	1	0	0
S694T	0	0.0215801	0	Train	1	0	0
N700K	0	0.0208027	0	Train	1	0	0
S702L	0	0.0868539	0	Train	1	0	0
P704L	0	0.0513671	0	Train	1	0	0
P705L	0	0.0614127	0	Train	1	0	0
A706D	0	0.0553736	0	Train	1	0	0
A707V	0	0.0346039	0	Train	1	0	0
P713A	0	0.0912292	0	Train	1	0	0
P714H	0	0.110272	0	Train	1	0	0
P724S	0	0.0246065	0	Train	1	0	0
G727S	0	0.0208197	0	Train	1	0	0
T730A	0	0.108772	0	Train	1	0	0
S731A	0	0.105636	0	Train	1	0	0
P732S	0	0.0228109	0	Train	1	0	0
R741L	0	0.128599	0	Train	1	0	0
P743L	0	0.0306241	0	Train	1	0	0
P745L	0	0.0396325	0	Train	1	0	0
H748Q	0	0.0339651	0	Train	1	0	0
R760C	0	0.0215291	0	Train	1	0	0
R767W	0	0.136061	0	Train	1	0	0
Q768R	0	0.0242626	0	Train	1	0	0
P772A	0	0.0283189	0	Train	1	0	0
P777S	0	0.076115	0	Train	1	0	0
E778V	0	0.170785	0	Train	1	0	0
G779R	0	0.0936086	0	Train	1	0	0
L781P	0	0.0315755	0	Train	1	0	0
R782W	0	0.0908527	0	Train	1	0	0
S789T	0	0.153973	0	Train	1	0	0
E796K	0	0.0957009	0	Train	1	0	0
K811R	0	0.0613674	0	Train	1	0	0
D815E	0	0.234994	0	Train	1	0	0
A822V	0	0.0828113	0	Train	1	0	0
K829E	0	0.0448818	0	Train	1	0	0
A835V	0	0.0900124	0	Train	1	0	0
E838G	0	0.295462	0	Train	1	0	0
C846R	0	0.0329888	0	Train	1	0	0
G850R	0	0.0271915	0	Train	1	0	0
P852L	0	0.0212833	0	Train	1	0	0
R854H	0	0.0261053	0	Train	1	0	0
S855L	0	0.0944197	0	Train	1	0	0
T857A	0	0.0906782	0	Train	1	0	0
V865M	0	0.166444	0	Train	1	0	0
V865G	0	0.166444	0	Train	1	0	0
G869E	0	0.0243017	0	Train	1	0	0
R871S	0	0.0206199	0	Train	1	0	0
R871G	0	0.0206199	0	Train	1	0	0
G290S	1	0.948341	1	Test	1	1	1
R581G	1	0.950414	1	Test	1	1	1
S303C	1	0.949917	1	Test	1	1	1
S247L	1	0.746498	1	Test	1	1	1
A253S	1	0.935658	1	Test	1	1	1
D563G	1	0.716228	1	Test	1	1	1
L241P	1	0.818311	1	Test	1	1	1
V135M	1	0.517318	0	Test	0	1	0
L339Q	1	0.85182	1	Test	1	1	1
T359A	1	0.522474	1	Test	1	1	1
S374L	0	0.187732	0	Test	1	1	1
P458S	0	0.0411937	0	Test	1	1	1
P708A	0	0.0207932	0	Test	1	1	1
M1T	1	0.685145	1	Test	1	1	1
A337G	1	0.848235	1	Test	1	1	1
D212E	1	0.950414	1	Test	1	1	1
G737S	0	0.0372637	0	Test	1	1	1
A828V	0	0.0551513	0	Test	1	1	1
D675N	0	0.0285847	0	Test	1	1	1
R432C	0	0.0405276	0	Test	1	1	1
D212G	1	0.950414	1	Test	1	1	1
A611S	0	0.0634416	0	Test	1	1	1
E254A	1	0.924294	1	Test	1	1	1
T771I	0	0.0853904	0	Test	1	1	1
R210H	1	0.950414	1	Test	1	1	1
G315R	1	0.796705	1	Test	1	1	1
N396S	1	0.568299	0	Test	0	1	0
V143M	0	0.220881	0	Test	1	1	1
A306P	1	0.936685	1	Test	1	1	1
G756S	0	0.0249334	0	Test	1	1	1
T276I	1	0.919775	1	Test	1	1	1
G574D	1	0.950342	1	Test	1	1	1
Y280H	1	0.901751	1	Test	1	1	1
V103D	1	0.512036	1	Test	1	1	1
S358F	1	0.522029	1	Test	1	1	1
Q188P	1	0.93008	1	Test	1	1	1
L293P	1	0.875632	1	Test	1	1	1
Y284D	1	0.949903	1	Test	1	1	1
R210C	1	0.950414	1	Test	1	1	1
Y154H	1	0.761057	1	Test	1	1	1
V450M	0	0.0431351	0	Test	1	1	1
W270R	1	0.950399	1	Test	1	1	1
P308S	1	0.89491	1	Test	1	1	1
A761S	0	0.0205521	0	Test	1	1	1
Y237C	1	0.804413	1	Test	1	1	1
R333W	1	0.644209	1	Test	1	1	1
G281R	1	0.930527	1	Test	1	1	1
F261S	1	0.863475	1	Test	1	1	1
K327M	1	0.78355	1	Test	1	1	1
D282N	1	0.943451	1	Test	1	1	1
T194P	1	0.905448	1	Test	1	1	1
F496I	0	0.0572779	0	Test	1	1	1
R581Q	1	0.950414	1	Test	1	1	1
G159E	1	0.743241	1	Test	1	1	1
R332G	1	0.854072	1	Test	1	1	1
A495P	0	0.0462164	0	Test	1	1	1
S751L	0	0.167906	0	Test	1	1	1
S187Y	1	0.936107	1	Test	1	1	1
T274M	1	0.936535	1	Test	1	1	1
D563E	1	0.716228	1	Test	1	1	1
V567D	1	0.780721	1	Test	1	1	1
T277I	1	0.902648	1	Test	1	1	1
Y237F	1	0.804413	1	Test	1	1	1
R691H	0	0.0214495	0	Test	1	1	1
P772L	0	0.0283189	0	Test	1	1	1
M578V	1	0.711317	1	Test	1	1	1
H228Y	1	0.75937	1	Test	1	1	1
L339R	1	0.85182	1	Test	1	1	1
P776H	0	0.0510934	0	Test	1	1	1
A306V	1	0.936685	1	Test	1	1	1
F261I	1	0.863475	1	Test	1	1	1
A43V	0	0.20679	0	Test	1	1	1
R198Q	1	0.915875	1	Test	1	1	1
A97V	1	0.511311	0	Test	0	1	0
R581L	1	0.939187	1	Test	1	1	1
G869R	0	0.0243017	0	Test	1	1	1
R353H	1	0.802685	1	Test	1	1	1
G315E	1	0.796705	1	Test	1	1	1
L107F	1	0.511579	1	Test	1	1	1
A309V	1	0.881849	1	Test	1	1	1
D355E	1	0.893106	1	Test	1	1	1
H228R	1	0.740813	1	Test	1	1	1
G418V	0	0.275523	0	Test	1	1	1
R604C	0	0.0432332	0	Test	1	1	1
R504W	0	0.22485	1	Test	0	1	0
R800H	0	0.23328	0	Test	1	1	1
H96N	1	0.511569	1	Test	1	1	1
R560Q	1	0.759362	1	Test	1	1	1
G279C	1	0.857446	1	Test	1	1	1

## Sheet: Cross-Validation Scores
	Logistic Regression		K Nearest Neighbors		Support Vector Machine		Random Forest
	Mean	Std	Mean	Std	Mean	Std	Mean	Std
AUC-ROC	0.989593	0.00686642	0.983322	0.0138587	0.98642	0.00939599	0.987491	0.00958257
F1-Score	0.943565	0.0232209	0.924102	0.0273876	0.939634	0.0226692	0.943985	0.0233518
Balanced-Accuracy	0.946136	0.0223604	0.927585	0.0261657	0.942234	0.0223046	0.946761	0.022307
Sensitivity	0.959415	0.0285487	0.936585	0.0397889	0.968	0.0261769	0.942829	0.0340878
Specificity	0.932858	0.0411095	0.918586	0.0415389	0.916468	0.0385557	0.950694	0.0359827
	Light GBM		CatBoost		XGBoost		Gaussian Process
	Mean	Std	Mean	Std	Mean	Std	Mean	Std
AUC-ROC	0.95717	0.023381	0.96511	0.0166913	0.95604	0.0250458	0.96658	0.0135803
F1-Score	0.900837	0.0284176	0.916573	0.0263746	0.902381	0.0334351	0.90257	0.028583
Balanced-Accuracy	0.90522	0.0272462	0.920075	0.0257471	0.90659	0.0324345	0.907279	0.0265079
Sensitivity	0.913756	0.045371	0.934634	0.0363354	0.918439	0.0484948	0.914341	0.0520737
Specificity	0.896684	0.0473973	0.905515	0.0447818	0.89474	0.0476604	0.900216	0.041118

## Sheet: Test Scores
	Support Vector Machine	Light GBM	Logistic Regression	K Nearest Neighbors	XGBoost	Random Forest	CatBoost	Gaussian Process
AUC-ROC	0.994624	0.997013	0.989845	0.979988	0.994325	0.996416	0.991338	0.992234
F1-Score	0.976	0.99187	0.95082	0.95082	0.99187	0.99187	0.983871	0.968254
Balanced-Accuracy	0.954898	0.991935	0.930705	0.930705	0.991935	0.991935	0.973417	0.93638
Sensitivity	0.983871	0.983871	0.935484	0.935484	0.983871	0.983871	0.983871	0.983871
Specificity	0.925926	1	0.925926	0.925926	1	1	0.962963	0.888889

[truncated: 2 more sheets: Ensemble Model, Ensemble Predictions]
