# Supplementary material for: MLe-KCNQ2: An Artificial Intelligence Model for the Prognosis of Missense KCNQ2 Gene Variants
Source: Int J Mol Sci. 2024 Mar 2;25(5):2910. doi: 10.3390/ijms25052910 (PMC10932340; doi:10.3390/ijms25052910)
Supplement: Supplementary file 1 [file ijms-25-02910-s001.zip › Supp_Data_4_All_Possible_Predictions_no_codon.xlsx]

## Sheet: Sheet1
Variant	Prediction	Score
M1A	Pathogenic	0.868797
M1G	Pathogenic	0.875299
M1V	Pathogenic	0.911652
M1C	Pathogenic	0.902505
M1P	Pathogenic	0.900405
M1L	Pathogenic	0.915062
M1I	Pathogenic	0.916902
M1W	Pathogenic	0.901582
M1F	Pathogenic	0.900213
M1K	Pathogenic	0.904059
M1R	Pathogenic	0.905948
M1H	Pathogenic	0.906197
M1S	Pathogenic	0.883009
M1T	Pathogenic	0.890275
M1Y	Pathogenic	0.887495
M1N	Pathogenic	0.901611
M1Q	Pathogenic	0.904124
M1D	Pathogenic	0.899743
M1E	Pathogenic	0.771247
V2A	Benign	0.0590121
V2G	Benign	0.0738092
V2C	Benign	0.0571121
V2P	Benign	0.192306
V2L	Benign	0.056189
V2I	Benign	0.0575711
V2M	Benign	0.0580332
V2W	Benign	0.146853
V2F	Benign	0.121918
V2K	Benign	0.130404
V2R	Benign	0.137206
V2H	Benign	0.111449
V2S	Benign	0.0782557
V2T	Benign	0.0730228
V2Y	Benign	0.149635
V2N	Benign	0.120154
V2Q	Benign	0.117846
V2D	Benign	0.120607
V2E	Benign	0.117967
Q3A	Benign	0.290738
Q3G	Benign	0.0833838
Q3V	Benign	0.278738
Q3C	Benign	0.0930296
Q3P	Benign	0.406806
Q3L	Benign	0.272868
Q3I	Benign	0.273728
Q3M	Benign	0.269152
Q3W	Benign	0.277867
Q3F	Benign	0.263034
Q3K	Benign	0.0964735
Q3R	Benign	0.096786
Q3H	Benign	0.0877542
Q3S	Benign	0.0924986
Q3T	Benign	0.0910237
Q3Y	Benign	0.290139
Q3N	Benign	0.078624
Q3D	Benign	0.0901884
Q3E	Benign	0.0673825
K4A	Benign	0.286908
K4G	Benign	0.12445
K4V	Benign	0.271632
K4C	Benign	0.139013
K4P	Benign	0.389691
K4L	Benign	0.265706
K4I	Benign	0.265782
K4M	Benign	0.264243
K4W	Benign	0.288914
K4F	Benign	0.269695
K4R	Benign	0.0710549
K4H	Benign	0.0681693
K4S	Benign	0.135365
K4T	Benign	0.133664
K4Y	Benign	0.302029
K4N	Benign	0.120473
K4Q	Benign	0.136259
K4D	Benign	0.131646
K4E	Benign	0.0991806
S5A	Benign	0.364622
S5G	Benign	0.122357
S5V	Benign	0.348488
S5C	Benign	0.128251
S5P	Benign	0.453764
S5L	Benign	0.342561
S5I	Benign	0.341913
S5M	Benign	0.342038
S5W	Benign	0.351278
S5F	Benign	0.335149
S5K	Benign	0.169463
S5R	Benign	0.186388
S5H	Benign	0.145597
S5T	Benign	0.137974
S5Y	Benign	0.363441
S5N	Benign	0.138998
S5Q	Benign	0.155648
S5D	Benign	0.148939
S5E	Benign	0.105886
R6A	Benign	0.223075
R6G	Benign	0.0737835
R6V	Benign	0.209879
R6C	Benign	0.087555
R6P	Benign	0.36286
R6L	Benign	0.204132
R6I	Benign	0.20491
R6M	Benign	0.201519
R6W	Benign	0.225203
R6F	Benign	0.208888
R6K	Benign	0.0617882
R6H	Benign	0.0627146
R6S	Benign	0.0821262
R6T	Benign	0.0808237
R6Y	Benign	0.237817
R6N	Benign	0.0671627
R6Q	Benign	0.0828494
R6D	Benign	0.0793016
R6E	Benign	0.0851231
N7A	Benign	0.107073
N7G	Benign	0.0228857
N7V	Benign	0.111332
N7C	Benign	0.0246081
N7P	Benign	0.211332
N7L	Benign	0.108098
N7I	Benign	0.112804
N7M	Benign	0.100357
N7W	Benign	0.116721
N7F	Benign	0.112881
N7K	Benign	0.0261624
N7R	Benign	0.025965
N7H	Benign	0.024078
N7S	Benign	0.024403
N7T	Benign	0.0241408
N7Y	Benign	0.121462
N7Q	Benign	0.0251573
N7D	Benign	0.0252284
N7E	Benign	0.0303119
G8A	Benign	0.0432906
G8V	Benign	0.0433253
G8C	Benign	0.0118447
G8P	Benign	0.137188
G8L	Benign	0.0427808
G8I	Benign	0.045385
G8M	Benign	0.0421507
G8W	Benign	0.0605804
G8F	Benign	0.0533405
G8K	Benign	0.0154115
G8R	Benign	0.0160333
G8H	Benign	0.0123186
G8S	Benign	0.0124481
G8T	Benign	0.0125472
G8Y	Benign	0.0626517
G8N	Benign	0.012043
G8Q	Benign	0.0125619
G8D	Benign	0.0183653
G8E	Benign	0.0176783
G9A	Benign	0.0336819
G9V	Benign	0.0338094
G9C	Benign	0.0092014
G9P	Benign	0.118144
G9L	Benign	0.033599
G9I	Benign	0.0338397
G9M	Benign	0.0333238
G9W	Benign	0.0437196
G9F	Benign	0.03952
G9K	Benign	0.0155612
G9R	Benign	0.0138935
G9H	Benign	0.0115585
G9S	Benign	0.00943535
G9T	Benign	0.00948247
G9Y	Benign	0.0448519
G9N	Benign	0.0113685
G9Q	Benign	0.00947153
G9D	Benign	0.0176409
G9E	Benign	0.0166943
V10A	Benign	0.0122422
V10G	Benign	0.0133801
V10C	Benign	0.0101628
V10P	Benign	0.0954264
V10L	Benign	0.0102658
V10I	Benign	0.0101883
V10M	Benign	0.0101796
V10W	Benign	0.0357026
V10F	Benign	0.0193789
V10K	Benign	0.0222005
V10R	Benign	0.0228179
V10H	Benign	0.0158585
V10S	Benign	0.0134967
V10T	Benign	0.0113819
V10Y	Benign	0.0387037
V10N	Benign	0.0207944
V10Q	Benign	0.0166462
V10D	Benign	0.0207988
V10E	Benign	0.0180406
Y11A	Benign	0.0179433
Y11G	Benign	0.0175917
Y11V	Benign	0.0158677
Y11C	Benign	0.0156666
Y11P	Benign	0.105177
Y11L	Benign	0.0158024
Y11I	Benign	0.0158761
Y11M	Benign	0.0177147
Y11W	Benign	0.0184175
Y11F	Benign	0.0161258
Y11K	Benign	0.025132
Y11R	Benign	0.0190152
Y11H	Benign	0.0182361
Y11S	Benign	0.0180306
Y11T	Benign	0.0158885
Y11N	Benign	0.0221001
Y11Q	Benign	0.0185131
Y11D	Benign	0.0243238
Y11E	Benign	0.0234727
P12A	Benign	0.0200373
P12G	Benign	0.0190832
P12V	Benign	0.0209134
P12C	Benign	0.0198105
P12L	Benign	0.0204614
P12I	Benign	0.0231199
P12M	Benign	0.0196165
P12W	Benign	0.0588555
P12F	Benign	0.0582701
P12K	Benign	0.0217821
P12R	Benign	0.0221137
P12H	Benign	0.0201049
P12S	Benign	0.020039
P12T	Benign	0.019991
P12Y	Benign	0.0606515
P12N	Benign	0.0198196
P12Q	Benign	0.0210837
P12D	Benign	0.0263769
P12E	Benign	0.0267085
G13A	Benign	0.0794431
G13V	Benign	0.0778754
G13C	Benign	0.018481
G13P	Benign	0.188832
G13L	Benign	0.0764573
G13I	Benign	0.0793534
G13M	Benign	0.0753596
G13W	Benign	0.104806
G13F	Benign	0.0920174
G13K	Benign	0.030354
G13R	Benign	0.0316525
G13H	Benign	0.0203222
G13S	Benign	0.0196509
G13T	Benign	0.019632
G13Y	Benign	0.108892
G13N	Benign	0.0196766
G13Q	Benign	0.0210873
G13D	Benign	0.0262024
G13E	Benign	0.0281729
P14A	Benign	0.0123989
P14G	Benign	0.0119977
P14V	Benign	0.0128215
P14C	Benign	0.0123048
P14L	Benign	0.0126086
P14I	Benign	0.0149719
P14M	Benign	0.0122171
P14W	Benign	0.0390391
P14F	Benign	0.0393038
P14K	Benign	0.0130273
P14R	Benign	0.0131872
P14H	Benign	0.0124245
P14S	Benign	0.0124263
P14T	Benign	0.0123969
P14Y	Benign	0.0399905
P14N	Benign	0.0121462
P14Q	Benign	0.0127148
P14D	Benign	0.0185338
P14E	Benign	0.0161202
S15A	Benign	0.0463485
S15G	Benign	0.0142291
S15V	Benign	0.0465711
S15C	Benign	0.014297
S15P	Benign	0.129755
S15L	Benign	0.0463348
S15I	Benign	0.0466098
S15M	Benign	0.045967
S15W	Benign	0.0544085
S15F	Benign	0.0516896
S15K	Benign	0.0124735
S15R	Benign	0.0133075
S15H	Benign	0.0123983
S15T	Benign	0.0143461
S15Y	Benign	0.0553921
S15N	Benign	0.012234
S15Q	Benign	0.0123532
S15D	Benign	0.0143415
S15E	Benign	0.0136801
G16A	Benign	0.0463485
G16V	Benign	0.0464813
G16C	Benign	0.0131537
G16P	Benign	0.130552
G16L	Benign	0.0463488
G16I	Benign	0.0465268
G16M	Benign	0.0461759
G16W	Benign	0.053579
G16F	Benign	0.0504993
G16K	Benign	0.013225
G16R	Benign	0.0136616
G16H	Benign	0.0113362
G16S	Benign	0.0133566
G16T	Benign	0.0134099
G16Y	Benign	0.0544263
G16N	Benign	0.0111779
G16Q	Benign	0.0133988
G16D	Benign	0.0132718
G16E	Benign	0.011191
E17A	Benign	0.0701617
E17G	Benign	0.0207921
E17V	Benign	0.0746603
E17C	Benign	0.0228877
E17P	Benign	0.156607
E17L	Benign	0.0738477
E17I	Benign	0.0751381
E17M	Benign	0.071664
E17W	Benign	0.0770224
E17F	Benign	0.0778861
E17K	Benign	0.0208738
E17R	Benign	0.0207822
E17H	Benign	0.0186704
E17S	Benign	0.0208825
E17T	Benign	0.0208668
E17Y	Benign	0.0775482
E17N	Benign	0.0208779
E17Q	Benign	0.0210064
E17D	Benign	0.0208918
K18A	Benign	0.0851128
K18G	Benign	0.0304765
K18V	Benign	0.086713
K18C	Benign	0.0323526
K18P	Benign	0.187915
K18L	Benign	0.0859902
K18I	Benign	0.086994
K18M	Benign	0.0844341
K18W	Benign	0.0878887
K18F	Benign	0.0878709
K18R	Benign	0.0434947
K18H	Benign	0.0413833
K18S	Benign	0.0305248
K18T	Benign	0.030521
K18Y	Benign	0.0886397
K18N	Benign	0.0302739
K18Q	Benign	0.0305132
K18D	Benign	0.0286798
K18E	Benign	0.0359308
K19A	Benign	0.127689
K19G	Benign	0.0494172
K19V	Benign	0.129605
K19C	Benign	0.0519325
K19P	Benign	0.232603
K19L	Benign	0.128705
K19I	Benign	0.129835
K19M	Benign	0.126572
K19W	Benign	0.130437
K19F	Benign	0.13011
K19R	Benign	0.0531573
K19H	Benign	0.0507679
K19S	Benign	0.0495194
K19T	Benign	0.0495078
K19Y	Benign	0.131504
K19N	Benign	0.0483004
K19Q	Benign	0.0487085
K19D	Benign	0.0454756
K19E	Benign	0.0484831
L20A	Benign	0.0574904
L20G	Benign	0.0626517
L20V	Benign	0.0540037
L20C	Benign	0.0541865
L20P	Benign	0.174973
L20I	Benign	0.0544433
L20M	Benign	0.0549925
L20W	Benign	0.105482
L20F	Benign	0.0753548
L20K	Benign	0.0832954
L20R	Benign	0.0904964
L20H	Benign	0.0735982
L20S	Benign	0.0643286
L20T	Benign	0.063974
L20Y	Benign	0.106489
L20N	Benign	0.0773346
L20Q	Benign	0.0787684
L20D	Benign	0.0776835
L20E	Benign	0.0783745
K21A	Pathogenic	0.594965
K21G	Pathogenic	0.53059
K21V	Pathogenic	0.594801
K21C	Pathogenic	0.534573
K21P	Pathogenic	0.62973
K21L	Pathogenic	0.593028
K21I	Pathogenic	0.594116
K21M	Pathogenic	0.588208
K21W	Pathogenic	0.596826
K21F	Pathogenic	0.593983
K21R	Benign	0.406851
K21H	Benign	0.410853
K21S	Pathogenic	0.531362
K21T	Pathogenic	0.531239
K21Y	Pathogenic	0.600175
K21N	Benign	0.493339
K21Q	Benign	0.494694
K21D	Benign	0.448326
K21E	Benign	0.353339
V22A	Benign	0.368722
V22G	Benign	0.409191
V22C	Benign	0.381778
V22P	Benign	0.457107
V22L	Benign	0.376346
V22I	Benign	0.368898
V22M	Benign	0.377299
V22W	Benign	0.469066
V22F	Benign	0.411352
V22K	Benign	0.441187
V22R	Benign	0.452062
V22H	Benign	0.42969
V22S	Benign	0.413918
V22T	Benign	0.409249
V22Y	Benign	0.472788
V22N	Benign	0.433948
V22Q	Benign	0.436472
V22D	Benign	0.434055
V22E	Benign	0.353182
G23A	Pathogenic	0.649647
G23V	Pathogenic	0.64107
G23C	Pathogenic	0.558178
G23P	Pathogenic	0.6775
G23L	Pathogenic	0.635975
G23I	Pathogenic	0.635868
G23M	Pathogenic	0.635603
G23W	Pathogenic	0.64552
G23F	Pathogenic	0.646276
G23K	Pathogenic	0.564382
G23R	Pathogenic	0.563612
G23H	Pathogenic	0.524919
G23S	Pathogenic	0.537036
G23T	Pathogenic	0.534391
G23Y	Pathogenic	0.654251
G23N	Pathogenic	0.52282
G23Q	Pathogenic	0.529236
G23D	Pathogenic	0.511321
G23E	Benign	0.40252
F24A	Benign	0.0580441
F24G	Benign	0.0542096
F24V	Benign	0.0484731
F24C	Benign	0.0479745
F24P	Benign	0.190166
F24L	Benign	0.0478492
F24I	Benign	0.0501583
F24M	Benign	0.0478522
F24W	Benign	0.0738381
F24K	Benign	0.103008
F24R	Benign	0.108694
F24H	Benign	0.0814949
F24S	Benign	0.0707236
F24T	Benign	0.0689407
F24Y	Benign	0.0812959
F24N	Benign	0.0817246
F24Q	Benign	0.0895548
F24D	Benign	0.0848594
F24E	Benign	0.0855554
V25A	Benign	0.0276322
V25G	Benign	0.0289361
V25C	Benign	0.0233446
V25P	Benign	0.122283
V25L	Benign	0.0236957
V25I	Benign	0.021418
V25M	Benign	0.0193969
V25W	Benign	0.0745586
V25F	Benign	0.0474116
V25K	Benign	0.0446221
V25R	Benign	0.0494848
V25H	Benign	0.0368439
V25S	Benign	0.0293525
V25T	Benign	0.0292379
V25Y	Benign	0.0802864
V25N	Benign	0.0410548
V25Q	Benign	0.0389958
V25D	Benign	0.0412043
V25E	Benign	0.0430756
G26A	Benign	0.0378239
G26V	Benign	0.0379658
G26C	Benign	0.00987056
G26P	Benign	0.12917
G26L	Benign	0.0375092
G26I	Benign	0.0400627
G26M	Benign	0.036941
G26W	Benign	0.0537072
G26F	Benign	0.0474717
G26K	Benign	0.0132913
G26R	Benign	0.0135383
G26H	Benign	0.0123232
G26S	Benign	0.010058
G26T	Benign	0.010067
G26Y	Benign	0.055535
G26N	Benign	0.0100337
G26Q	Benign	0.0102858
G26D	Benign	0.0184228
G26E	Benign	0.0163529
L27A	Benign	0.0085983
L27G	Benign	0.00940992
L27V	Benign	0.00821001
L27C	Benign	0.00815115
L27P	Benign	0.0971311
L27I	Benign	0.0101834
L27M	Benign	0.0081625
L27W	Benign	0.0505542
L27F	Benign	0.0297236
L27K	Benign	0.0232295
L27R	Benign	0.0242787
L27H	Benign	0.0134587
L27S	Benign	0.0102335
L27T	Benign	0.0100724
L27Y	Benign	0.053861
L27N	Benign	0.0200783
L27Q	Benign	0.0188817
L27D	Benign	0.0204323
L27E	Benign	0.0184659
D28A	Benign	0.0264038
D28G	Benign	0.00703616
D28V	Benign	0.0313009
D28C	Benign	0.00907151
D28P	Benign	0.098699
D28L	Benign	0.030459
D28I	Benign	0.0339568
D28M	Benign	0.0280732
D28W	Benign	0.0361151
D28F	Benign	0.0379575
D28K	Benign	0.00709698
D28R	Benign	0.00701397
D28H	Benign	0.00700673
D28S	Benign	0.00709749
D28T	Benign	0.0090099
D28Y	Benign	0.0364991
D28N	Benign	0.0071023
D28Q	Benign	0.00718903
D28E	Benign	0.0092402
P29A	Benign	0.00651644
P29G	Benign	0.00858012
P29V	Benign	0.00660114
P29C	Benign	0.00656368
P29L	Benign	0.00658611
P29I	Benign	0.00869322
P29M	Benign	0.00655807
P29W	Benign	0.0118885
P29F	Benign	0.0125461
P29K	Benign	0.00874026
P29R	Benign	0.00880368
P29H	Benign	0.00871172
P29S	Benign	0.00651569
P29T	Benign	0.00652887
P29Y	Benign	0.0121075
P29N	Benign	0.00856114
P29Q	Benign	0.00858632
P29D	Benign	0.0149561
P29E	Benign	0.011278
G30A	Benign	0.0261898
G30V	Benign	0.0264774
G30C	Benign	0.00716947
G30P	Benign	0.110226
G30L	Benign	0.0262393
G30I	Benign	0.0286299
G30M	Benign	0.0258677
G30W	Benign	0.0380558
G30F	Benign	0.0339435
G30K	Benign	0.00833814
G30R	Benign	0.00853738
G30H	Benign	0.00754266
G30S	Benign	0.00725569
G30T	Benign	0.007285
G30Y	Benign	0.0392182
G30N	Benign	0.00726359
G30Q	Benign	0.00736868
G30D	Benign	0.0136727
G30E	Benign	0.0140313
A31G	Benign	0.0136776
A31V	Benign	0.012294
A31C	Benign	0.0122158
A31P	Benign	0.108515
A31L	Benign	0.0121894
A31I	Benign	0.0143723
A31M	Benign	0.0123288
A31W	Benign	0.0651175
A31F	Benign	0.0541836
A31K	Benign	0.0266502
A31R	Benign	0.0301543
A31H	Benign	0.0231949
A31S	Benign	0.0145893
A31T	Benign	0.0143515
A31Y	Benign	0.067203
A31N	Benign	0.0219323
A31Q	Benign	0.0224195
A31D	Benign	0.0303835
A31E	Benign	0.0272393
P32A	Benign	0.0184312
P32G	Benign	0.0201832
P32V	Benign	0.0187214
P32C	Benign	0.0183557
P32L	Benign	0.0185635
P32I	Benign	0.0208358
P32M	Benign	0.0182937
P32W	Benign	0.039087
P32F	Benign	0.0388485
P32K	Benign	0.0213367
P32R	Benign	0.0214968
P32H	Benign	0.0205631
P32S	Benign	0.0184804
P32T	Benign	0.018477
P32Y	Benign	0.0399842
P32N	Benign	0.0205606
P32Q	Benign	0.0210638
P32D	Benign	0.0269323
P32E	Benign	0.0272253
D33A	Benign	0.0758207
D33G	Benign	0.023191
D33V	Benign	0.0815038
D33C	Benign	0.0256068
D33P	Benign	0.172878
D33L	Benign	0.079614
D33I	Benign	0.0818126
D33M	Benign	0.0750959
D33W	Benign	0.0862216
D33F	Benign	0.0857689
D33K	Benign	0.0232334
D33R	Benign	0.0231501
D33H	Benign	0.0229857
D33S	Benign	0.0237511
D33T	Benign	0.0255763
D33Y	Benign	0.0883536
D33N	Benign	0.0232808
D33Q	Benign	0.0240479
D33E	Benign	0.0315663
S34A	Benign	0.071206
S34G	Benign	0.0252945
S34V	Benign	0.070752
S34C	Benign	0.02574
S34P	Benign	0.170109
S34L	Benign	0.0700591
S34I	Benign	0.0705264
S34M	Benign	0.069349
S34W	Benign	0.0836349
S34F	Benign	0.0768648
S34K	Benign	0.0315148
S34R	Benign	0.0387072
S34H	Benign	0.0268009
S34T	Benign	0.026005
S34Y	Benign	0.085931
S34N	Benign	0.0305522
S34Q	Benign	0.0271856
S34D	Benign	0.0327558
S34E	Benign	0.0339747
T35A	Benign	0.133572
T35G	Benign	0.0430684
T35V	Benign	0.124928
T35C	Benign	0.0428819
T35P	Benign	0.264708
T35L	Benign	0.121335
T35I	Benign	0.120132
T35M	Benign	0.120218
T35W	Benign	0.137647
T35F	Benign	0.126413
T35K	Benign	0.0566824
T35R	Benign	0.0627005
T35H	Benign	0.0515057
T35S	Benign	0.0456553
T35Y	Benign	0.14728
T35N	Benign	0.0484337
T35Q	Benign	0.0541688
T35D	Benign	0.0519516
T35E	Benign	0.0526253
R36A	Pathogenic	0.685684
R36G	Pathogenic	0.585266
R36V	Pathogenic	0.675306
R36C	Pathogenic	0.59634
R36P	Pathogenic	0.70836
R36L	Pathogenic	0.667918
R36I	Pathogenic	0.670012
R36M	Pathogenic	0.664329
R36W	Pathogenic	0.684851
R36F	Pathogenic	0.672283
R36K	Benign	0.403645
R36H	Benign	0.43179
R36S	Pathogenic	0.591453
R36T	Pathogenic	0.590463
R36Y	Pathogenic	0.69634
R36N	Pathogenic	0.531404
R36Q	Pathogenic	0.57326
R36D	Pathogenic	0.527978
R36E	Benign	0.41341
D37A	Pathogenic	0.796201
D37G	Pathogenic	0.573884
D37V	Pathogenic	0.786034
D37C	Pathogenic	0.593476
D37P	Pathogenic	0.881749
D37L	Pathogenic	0.779576
D37I	Pathogenic	0.779284
D37M	Pathogenic	0.780976
D37W	Pathogenic	0.782379
D37F	Pathogenic	0.768607
D37K	Pathogenic	0.54445
D37R	Pathogenic	0.5485
D37H	Pathogenic	0.526903
D37S	Pathogenic	0.601027
D37T	Pathogenic	0.59757
D37Y	Pathogenic	0.79017
D37N	Pathogenic	0.54438
D37Q	Pathogenic	0.577526
D37E	Pathogenic	0.550482
G38A	Pathogenic	0.942739
G38V	Pathogenic	0.939453
G38C	Pathogenic	0.861234
G38P	Pathogenic	0.945752
G38L	Pathogenic	0.936056
G38I	Pathogenic	0.937208
G38M	Pathogenic	0.938212
G38W	Pathogenic	0.937781
G38F	Pathogenic	0.933033
G38K	Pathogenic	0.897881
G38R	Pathogenic	0.901059
G38H	Pathogenic	0.880209
G38S	Pathogenic	0.885803
G38T	Pathogenic	0.883185
G38Y	Pathogenic	0.939954
G38N	Pathogenic	0.865431
G38Q	Pathogenic	0.892057
G38D	Pathogenic	0.862261
G38E	Pathogenic	0.776122
A39G	Pathogenic	0.87849
A39V	Pathogenic	0.883322
A39C	Pathogenic	0.880255
A39P	Pathogenic	0.915114
A39L	Pathogenic	0.877059
A39I	Pathogenic	0.876667
A39M	Pathogenic	0.879819
A39W	Pathogenic	0.895621
A39F	Pathogenic	0.885127
A39K	Pathogenic	0.905439
A39R	Pathogenic	0.907763
A39H	Pathogenic	0.899112
A39S	Pathogenic	0.898668
A39T	Pathogenic	0.899877
A39Y	Pathogenic	0.902834
A39N	Pathogenic	0.886052
A39Q	Pathogenic	0.910528
A39D	Pathogenic	0.886882
A39E	Pathogenic	0.807156
L40A	Pathogenic	0.813688
L40G	Pathogenic	0.827562
L40V	Pathogenic	0.783652
L40C	Pathogenic	0.791995
L40P	Pathogenic	0.892633
L40I	Pathogenic	0.800061
L40M	Pathogenic	0.803035
L40W	Pathogenic	0.860859
L40F	Pathogenic	0.841612
L40K	Pathogenic	0.864597
L40R	Pathogenic	0.867448
L40H	Pathogenic	0.856849
L40S	Pathogenic	0.850691
L40T	Pathogenic	0.85446
L40Y	Pathogenic	0.865854
L40N	Pathogenic	0.841606
L40Q	Pathogenic	0.86484
L40D	Pathogenic	0.846926
L40E	Pathogenic	0.7751
L41A	Benign	0.499762
L41G	Pathogenic	0.542211
L41V	Benign	0.462562
L41C	Benign	0.476354
L41P	Pathogenic	0.678754
L41I	Benign	0.499823
L41M	Benign	0.486225
L41W	Pathogenic	0.613235
L41F	Pathogenic	0.575447
L41K	Pathogenic	0.627662
L41R	Pathogenic	0.630665
L41H	Pathogenic	0.604192
L41S	Pathogenic	0.578753
L41T	Pathogenic	0.580056
L41Y	Pathogenic	0.622467
L41N	Pathogenic	0.582721
L41Q	Pathogenic	0.617442
L41D	Pathogenic	0.591486
L41E	Pathogenic	0.539659
I42A	Benign	0.169555
I42G	Benign	0.183822
I42V	Benign	0.145063
I42C	Benign	0.145835
I42P	Benign	0.300447
I42L	Benign	0.142952
I42M	Benign	0.148242
I42W	Benign	0.258659
I42F	Benign	0.2228
I42K	Benign	0.282007
I42R	Benign	0.285205
I42H	Benign	0.24937
I42S	Benign	0.214195
I42T	Benign	0.208884
I42Y	Benign	0.267918
I42N	Benign	0.239168
I42Q	Benign	0.266454
I42D	Benign	0.248249
I42E	Benign	0.193279
A43G	Benign	0.0647589
A43V	Benign	0.0601664
A43C	Benign	0.0588756
A43P	Benign	0.204364
A43L	Benign	0.0593086
A43I	Benign	0.0614086
A43M	Benign	0.0593445
A43W	Benign	0.130132
A43F	Benign	0.117999
A43K	Benign	0.110631
A43R	Benign	0.116172
A43H	Benign	0.0938738
A43S	Benign	0.0719572
A43T	Benign	0.0714527
A43Y	Benign	0.133702
A43N	Benign	0.0971496
A43Q	Benign	0.1041
A43D	Benign	0.103069
A43E	Benign	0.101674
G44A	Benign	0.282298
G44V	Benign	0.268774
G44C	Benign	0.109335
G44P	Benign	0.377536
G44L	Benign	0.264259
G44I	Benign	0.265363
G44M	Benign	0.264041
G44W	Benign	0.28702
G44F	Benign	0.267979
G44K	Benign	0.135893
G44R	Benign	0.134134
G44H	Benign	0.116986
G44S	Benign	0.114645
G44T	Benign	0.113675
G44Y	Benign	0.298675
G44N	Benign	0.11711
G44Q	Benign	0.120884
G44D	Benign	0.123279
G44E	Benign	0.073684
S45A	Pathogenic	0.625002
S45G	Benign	0.345838
S45V	Pathogenic	0.610363
S45C	Benign	0.398014
S45P	Pathogenic	0.726783
S45L	Pathogenic	0.603564
S45I	Pathogenic	0.602864
S45M	Pathogenic	0.602504
S45W	Pathogenic	0.603452
S45F	Pathogenic	0.608903
S45K	Benign	0.362971
S45R	Benign	0.407902
S45H	Benign	0.353142
S45T	Benign	0.368857
S45Y	Pathogenic	0.620669
S45N	Benign	0.354977
S45Q	Benign	0.367408
S45D	Benign	0.346591
S45E	Benign	0.316505
E46A	Pathogenic	0.754747
E46G	Pathogenic	0.637705
E46V	Pathogenic	0.746931
E46C	Pathogenic	0.641812
E46P	Pathogenic	0.79863
E46L	Pathogenic	0.738662
E46I	Pathogenic	0.73916
E46M	Pathogenic	0.734681
E46W	Pathogenic	0.743758
E46F	Pathogenic	0.731125
E46K	Pathogenic	0.62518
E46R	Pathogenic	0.622991
E46H	Pathogenic	0.620265
E46S	Pathogenic	0.645323
E46T	Pathogenic	0.644056
E46Y	Pathogenic	0.755721
E46N	Pathogenic	0.625698
E46Q	Pathogenic	0.635766
E46D	Pathogenic	0.61433
A47G	Pathogenic	0.682717
A47V	Pathogenic	0.678917
A47C	Pathogenic	0.679135
A47P	Pathogenic	0.717973
A47L	Pathogenic	0.676201
A47I	Pathogenic	0.675915
A47M	Pathogenic	0.679774
A47W	Pathogenic	0.739764
A47F	Pathogenic	0.726658
A47K	Pathogenic	0.713527
A47R	Pathogenic	0.722888
A47H	Pathogenic	0.70556
A47S	Pathogenic	0.691525
A47T	Pathogenic	0.693079
A47Y	Pathogenic	0.743406
A47N	Pathogenic	0.704515
A47Q	Pathogenic	0.71727
A47D	Pathogenic	0.697817
A47E	Pathogenic	0.614969
P48A	Pathogenic	0.623595
P48G	Pathogenic	0.606804
P48V	Pathogenic	0.632788
P48C	Pathogenic	0.631183
P48L	Pathogenic	0.630068
P48I	Pathogenic	0.630856
P48M	Pathogenic	0.630892
P48W	Pathogenic	0.657857
P48F	Pathogenic	0.657901
P48K	Pathogenic	0.599717
P48R	Pathogenic	0.60891
P48H	Pathogenic	0.591774
P48S	Pathogenic	0.606181
P48T	Pathogenic	0.632027
P48Y	Pathogenic	0.650612
P48N	Pathogenic	0.598477
P48Q	Pathogenic	0.608616
P48D	Pathogenic	0.592667
P48E	Pathogenic	0.510071
K49A	Pathogenic	0.70919
K49G	Pathogenic	0.514924
K49V	Pathogenic	0.699774
K49C	Pathogenic	0.525255
K49P	Pathogenic	0.738411
K49L	Pathogenic	0.692994
K49I	Pathogenic	0.69276
K49M	Pathogenic	0.689834
K49W	Pathogenic	0.704268
K49F	Pathogenic	0.692884
K49R	Benign	0.393496
K49H	Benign	0.397676
K49S	Pathogenic	0.52
K49T	Pathogenic	0.519164
K49Y	Pathogenic	0.714805
K49N	Benign	0.483707
K49Q	Benign	0.488897
K49D	Benign	0.440573
K49E	Benign	0.337179
R50A	Pathogenic	0.652491
R50G	Pathogenic	0.556744
R50V	Pathogenic	0.644572
R50C	Pathogenic	0.566084
R50P	Pathogenic	0.707126
R50L	Pathogenic	0.637898
R50I	Pathogenic	0.640093
R50M	Pathogenic	0.634085
R50W	Pathogenic	0.650712
R50F	Pathogenic	0.641045
R50K	Benign	0.40835
R50H	Benign	0.438721
R50S	Pathogenic	0.561166
R50T	Pathogenic	0.56045
R50Y	Pathogenic	0.660643
R50N	Pathogenic	0.501327
R50Q	Pathogenic	0.542825
R50D	Benign	0.498585
R50E	Benign	0.410621
G51A	Benign	0.203179
G51V	Benign	0.193641
G51C	Benign	0.0671532
G51P	Benign	0.326972
G51L	Benign	0.190211
G51I	Benign	0.192102
G51M	Benign	0.189652
G51W	Benign	0.215613
G51F	Benign	0.198813
G51K	Benign	0.087177
G51R	Benign	0.0846707
G51H	Benign	0.0712678
G51S	Benign	0.0701578
G51T	Benign	0.0696117
G51Y	Benign	0.224954
G51N	Benign	0.0731446
G51Q	Benign	0.0738429
G51D	Benign	0.0785084
G51E	Benign	0.0587747
S52A	Benign	0.146405
S52G	Benign	0.0297006
S52V	Benign	0.137693
S52C	Benign	0.0304983
S52P	Benign	0.286823
S52L	Benign	0.133763
S52I	Benign	0.135951
S52M	Benign	0.131893
S52W	Benign	0.158424
S52F	Benign	0.142097
S52K	Benign	0.0447562
S52R	Benign	0.0478101
S52H	Benign	0.0350205
S52T	Benign	0.0332662
S52Y	Benign	0.168024
S52N	Benign	0.0364309
S52Q	Benign	0.0376833
S52D	Benign	0.0419426
S52E	Benign	0.043328
I53A	Benign	0.025951
I53G	Benign	0.0308131
I53V	Benign	0.0236153
I53C	Benign	0.0236901
I53P	Benign	0.132717
I53L	Benign	0.02331
I53M	Benign	0.0239087
I53W	Benign	0.0943436
I53F	Benign	0.0607331
I53K	Benign	0.0675207
I53R	Benign	0.0750256
I53H	Benign	0.0485317
I53S	Benign	0.034894
I53T	Benign	0.0340943
I53Y	Benign	0.0990668
I53N	Benign	0.0559987
I53Q	Benign	0.0581149
I53D	Benign	0.0570387
I53E	Benign	0.0580032
L54A	Benign	0.0186559
L54G	Benign	0.0233401
L54V	Benign	0.0173638
L54C	Benign	0.0172684
L54P	Benign	0.117523
L54I	Benign	0.0192361
L54M	Benign	0.0176244
L54W	Benign	0.072905
L54F	Benign	0.0438242
L54K	Benign	0.0438274
L54R	Benign	0.0473781
L54H	Benign	0.0313393
L54S	Benign	0.0253585
L54T	Benign	0.0249724
L54Y	Benign	0.07702
L54N	Benign	0.037729
L54Q	Benign	0.0378943
L54D	Benign	0.038279
L54E	Benign	0.0378882
S55A	Benign	0.0479247
S55G	Benign	0.0124333
S55V	Benign	0.0476024
S55C	Benign	0.0126691
S55P	Benign	0.141877
S55L	Benign	0.047179
S55I	Benign	0.0495408
S55M	Benign	0.0461833
S55W	Benign	0.0638619
S55F	Benign	0.0572117
S55K	Benign	0.0135405
S55R	Benign	0.0168676
S55H	Benign	0.0130471
S55T	Benign	0.0129096
S55Y	Benign	0.066174
S55N	Benign	0.0126417
S55Q	Benign	0.0132728
S55D	Benign	0.0190048
S55E	Benign	0.0163494
K56A	Benign	0.0393207
K56G	Benign	0.0123147
K56V	Benign	0.0406071
K56C	Benign	0.0133408
K56P	Benign	0.125219
K56L	Benign	0.0400027
K56I	Benign	0.0428597
K56M	Benign	0.0385913
K56W	Benign	0.0454025
K56F	Benign	0.045105
K56R	Benign	0.0158546
K56H	Benign	0.0158523
K56S	Benign	0.0124156
K56T	Benign	0.0124004
K56Y	Benign	0.0462116
K56N	Benign	0.0121395
K56Q	Benign	0.0123906
K56D	Benign	0.0115843
K56E	Benign	0.0125306
P57A	Benign	0.00777485
P57G	Benign	0.00765657
P57V	Benign	0.00802502
P57C	Benign	0.007828
P57L	Benign	0.00794671
P57I	Benign	0.0101474
P57M	Benign	0.00779634
P57W	Benign	0.0235305
P57F	Benign	0.0247305
P57K	Benign	0.00804541
P57R	Benign	0.00814582
P57H	Benign	0.00787908
P57S	Benign	0.00777083
P57T	Benign	0.00779723
P57Y	Benign	0.0240437
P57N	Benign	0.00766719
P57Q	Benign	0.00781967
P57D	Benign	0.0140929
P57E	Benign	0.0123145
R58A	Benign	0.0241691
R58G	Benign	0.00734107
R58V	Benign	0.0254679
R58C	Benign	0.0079681
R58P	Benign	0.0921822
R58L	Benign	0.0250799
R58I	Benign	0.027797
R58M	Benign	0.0260913
R58W	Benign	0.0301275
R58F	Benign	0.0291327
R58K	Benign	0.00991773
R58H	Benign	0.00996966
R58S	Benign	0.00734814
R58T	Benign	0.00734851
R58Y	Benign	0.0282875
R58N	Benign	0.00718093
R58Q	Benign	0.00724857
R58D	Benign	0.0110283
R58E	Benign	0.0085588
A59G	Benign	0.00712254
A59V	Benign	0.00688412
A59C	Benign	0.00687761
A59P	Benign	0.0756094
A59L	Benign	0.00687182
A59I	Benign	0.00689299
A59M	Benign	0.006901
A59W	Benign	0.0349897
A59F	Benign	0.0261745
A59K	Benign	0.0129
A59R	Benign	0.0141541
A59H	Benign	0.0120348
A59S	Benign	0.00729976
A59T	Benign	0.00722682
A59Y	Benign	0.0367938
A59N	Benign	0.0121064
A59Q	Benign	0.0121268
A59D	Benign	0.0164169
A59E	Benign	0.0124008
G60A	Benign	0.0202538
G60V	Benign	0.0203675
G60C	Benign	0.00635876
G60P	Benign	0.0828529
G60L	Benign	0.0203091
G60I	Benign	0.0203999
G60M	Benign	0.0202075
G60W	Benign	0.0250025
G60F	Benign	0.0232416
G60K	Benign	0.00946189
G60R	Benign	0.00755303
G60H	Benign	0.00666826
G60S	Benign	0.00639779
G60T	Benign	0.00643703
G60Y	Benign	0.0255102
G60N	Benign	0.00850451
G60Q	Benign	0.0064544
G60D	Benign	0.012813
G60E	Benign	0.0121198
G61A	Benign	0.0204099
G61V	Benign	0.0204877
G61C	Benign	0.00601179
G61P	Benign	0.0841902
G61L	Benign	0.0204573
G61I	Benign	0.0205114
G61M	Benign	0.0204003
G61W	Benign	0.0232773
G61F	Benign	0.0221878
G61K	Benign	0.0090978
G61R	Benign	0.00806843
G61H	Benign	0.0071958
G61S	Benign	0.00604455
G61T	Benign	0.00608508
G61Y	Benign	0.0235941
G61N	Benign	0.0081553
G61Q	Benign	0.00609565
G61D	Benign	0.0124614
G61E	Benign	0.0111014
A62G	Benign	0.0059547
A62V	Benign	0.00583266
A62C	Benign	0.00582832
A62P	Benign	0.0692903
A62L	Benign	0.00582654
A62I	Benign	0.0058389
A62M	Benign	0.00584028
A62W	Benign	0.0264335
A62F	Benign	0.0194557
A62K	Benign	0.0100164
A62R	Benign	0.0107461
A62H	Benign	0.00944145
A62S	Benign	0.00607065
A62T	Benign	0.00599623
A62Y	Benign	0.0279492
A62N	Benign	0.00965588
A62Q	Benign	0.00965828
A62D	Benign	0.0138231
A62E	Benign	0.00965659
G63A	Benign	0.0140514
G63V	Benign	0.0140973
G63C	Benign	0.00560191
G63P	Benign	0.0639903
G63L	Benign	0.0140818
G63I	Benign	0.0141108
G63M	Benign	0.0140498
G63W	Benign	0.0158516
G63F	Benign	0.0152366
G63K	Benign	0.00817549
G63R	Benign	0.00609651
G63H	Benign	0.0056284
G63S	Benign	0.00556603
G63T	Benign	0.00560184
G63Y	Benign	0.0160418
G63N	Benign	0.0077683
G63Q	Benign	0.00570694
G63D	Benign	0.0119351
G63E	Benign	0.00985177
A64G	Benign	0.0060415
A64V	Benign	0.00593667
A64C	Benign	0.0059335
A64P	Benign	0.0583484
A64L	Benign	0.00593199
A64I	Benign	0.00594185
A64M	Benign	0.00594307
A64W	Benign	0.0233176
A64F	Benign	0.0171908
A64K	Benign	0.0101134
A64R	Benign	0.0106875
A64H	Benign	0.00966274
A64S	Benign	0.00615412
A64T	Benign	0.00615429
A64Y	Benign	0.0246841
A64N	Benign	0.00983234
A64Q	Benign	0.00983256
A64D	Benign	0.0139991
A64E	Benign	0.0098324
G65A	Benign	0.0141168
G65V	Benign	0.0141705
G65C	Benign	0.00577204
G65P	Benign	0.0618896
G65L	Benign	0.0141525
G65I	Benign	0.0141857
G65M	Benign	0.0141143
G65W	Benign	0.0164112
G65F	Benign	0.0156048
G65K	Benign	0.00868147
G65R	Benign	0.00671538
G65H	Benign	0.00582232
G65S	Benign	0.00583218
G65T	Benign	0.00587854
G65Y	Benign	0.0166202
G65N	Benign	0.00791221
G65Q	Benign	0.00591345
G65D	Benign	0.0141624
G65E	Benign	0.0120791
K66A	Benign	0.015059
K66G	Benign	0.00573395
K66V	Benign	0.0154842
K66C	Benign	0.00585166
K66P	Benign	0.0687414
K66L	Benign	0.0153729
K66I	Benign	0.0176617
K66M	Benign	0.01506
K66W	Benign	0.0166711
K66F	Benign	0.0171401
K66R	Benign	0.00564618
K66H	Benign	0.00564571
K66S	Benign	0.00573044
K66T	Benign	0.00573132
K66Y	Benign	0.0167358
K66N	Benign	0.00567963
K66Q	Benign	0.00572262
K66D	Benign	0.00559031
K66E	Benign	0.00559059
P67A	Benign	0.00602232
P67G	Benign	0.0060061
P67V	Benign	0.00615216
P67C	Benign	0.00611398
P67L	Benign	0.0061373
P67I	Benign	0.0082458
P67M	Benign	0.00610835
P67W	Benign	0.0117553
P67F	Benign	0.0127383
P67K	Benign	0.00613746
P67R	Benign	0.00621318
P67H	Benign	0.0061163
P67S	Benign	0.00601949
P67T	Benign	0.00606382
P67Y	Benign	0.0119485
P67N	Benign	0.00596936
P67Q	Benign	0.00598733
P67D	Benign	0.0123626
P67E	Benign	0.0104272
P68A	Benign	0.0081612
P68G	Benign	0.007989
P68V	Benign	0.00903841
P68C	Benign	0.00874942
P68L	Benign	0.00892473
P68I	Benign	0.0111786
P68M	Benign	0.0087022
P68W	Benign	0.0285234
P68F	Benign	0.0298079
P68K	Benign	0.00850792
P68R	Benign	0.00862345
P68H	Benign	0.00826888
P68S	Benign	0.00815189
P68T	Benign	0.00816965
P68Y	Benign	0.0291342
P68N	Benign	0.00802658
P68Q	Benign	0.00824407
P68D	Benign	0.014468
P68E	Benign	0.0124254
K69A	Benign	0.0847694
K69G	Benign	0.0238622
K69V	Benign	0.0834098
K69C	Benign	0.0276901
K69P	Benign	0.190189
K69L	Benign	0.0814477
K69I	Benign	0.0843911
K69M	Benign	0.078878
K69W	Benign	0.0960859
K69F	Benign	0.0909077
K69R	Benign	0.0341064
K69H	Benign	0.0339399
K69S	Benign	0.0249415
K69T	Benign	0.0247651
K69Y	Benign	0.100392
K69N	Benign	0.023144
K69Q	Benign	0.024953
K69D	Benign	0.0220654
K69E	Benign	0.0267887
R70A	Benign	0.224584
R70G	Benign	0.0790311
R70V	Benign	0.212307
R70C	Benign	0.0919427
R70P	Benign	0.357025
R70L	Benign	0.20885
R70I	Benign	0.207836
R70M	Benign	0.203879
R70W	Benign	0.226738
R70F	Benign	0.211512
R70K	Benign	0.0612775
R70H	Benign	0.0622875
R70S	Benign	0.0863647
R70T	Benign	0.0852095
R70Y	Benign	0.23899
R70N	Benign	0.0727788
R70Q	Benign	0.0850042
R70D	Benign	0.0835882
R70E	Benign	0.0790645
N71A	Pathogenic	0.71131
N71G	Pathogenic	0.502855
N71V	Pathogenic	0.6968
N71C	Pathogenic	0.519696
N71P	Pathogenic	0.786338
N71L	Pathogenic	0.692792
N71I	Pathogenic	0.690336
N71M	Pathogenic	0.686603
N71W	Pathogenic	0.694782
N71F	Pathogenic	0.678327
N71K	Pathogenic	0.509898
N71R	Pathogenic	0.512368
N71H	Benign	0.487081
N71S	Pathogenic	0.517793
N71T	Pathogenic	0.515519
N71Y	Pathogenic	0.706959
N71Q	Benign	0.499327
N71D	Benign	0.436447
N71E	Benign	0.375324
A72G	Pathogenic	0.579595
A72V	Pathogenic	0.616341
A72C	Pathogenic	0.59848
A72P	Pathogenic	0.687145
A72L	Pathogenic	0.61776
A72I	Pathogenic	0.612936
A72M	Pathogenic	0.584299
A72W	Pathogenic	0.662708
A72F	Pathogenic	0.649802
A72K	Pathogenic	0.672656
A72R	Pathogenic	0.677818
A72H	Pathogenic	0.651304
A72S	Pathogenic	0.607547
A72T	Pathogenic	0.62631
A72Y	Pathogenic	0.670193
A72N	Pathogenic	0.642706
A72Q	Pathogenic	0.668503
A72D	Pathogenic	0.646746
A72E	Pathogenic	0.53719
F73A	Benign	0.445582
F73G	Benign	0.446314
F73V	Benign	0.450739
F73C	Benign	0.442717
F73P	Pathogenic	0.58981
F73L	Benign	0.475085
F73I	Benign	0.489523
F73M	Benign	0.456924
F73W	Pathogenic	0.539553
F73K	Pathogenic	0.578345
F73R	Pathogenic	0.586868
F73H	Pathogenic	0.544153
F73S	Pathogenic	0.517362
F73T	Pathogenic	0.516021
F73Y	Pathogenic	0.552028
F73N	Pathogenic	0.533424
F73Q	Pathogenic	0.559408
F73D	Pathogenic	0.546117
F73E	Benign	0.472217
Y74A	Benign	0.178204
Y74G	Benign	0.160466
Y74V	Benign	0.182482
Y74C	Benign	0.171638
Y74P	Benign	0.243848
Y74L	Benign	0.177793
Y74I	Benign	0.180963
Y74M	Benign	0.169309
Y74W	Benign	0.189601
Y74F	Benign	0.190439
Y74K	Benign	0.210224
Y74R	Benign	0.211627
Y74H	Benign	0.187265
Y74S	Benign	0.179651
Y74T	Benign	0.172832
Y74N	Benign	0.174481
Y74Q	Benign	0.195795
Y74D	Benign	0.183304
Y74E	Benign	0.127101
R75A	Benign	0.329363
R75G	Benign	0.135788
R75V	Benign	0.316278
R75C	Benign	0.149431
R75P	Benign	0.435867
R75L	Benign	0.310431
R75I	Benign	0.309166
R75M	Benign	0.307648
R75W	Benign	0.32856
R75F	Benign	0.312431
R75K	Benign	0.0758299
R75H	Benign	0.0784436
R75S	Benign	0.144423
R75T	Benign	0.143073
R75Y	Benign	0.341261
R75N	Benign	0.122259
R75Q	Benign	0.140134
R75D	Benign	0.130401
R75E	Benign	0.10765
K76A	Pathogenic	0.675264
K76G	Pathogenic	0.564792
K76V	Pathogenic	0.662948
K76C	Pathogenic	0.575163
K76P	Pathogenic	0.721876
K76L	Pathogenic	0.659808
K76I	Pathogenic	0.656724
K76M	Pathogenic	0.653237
K76W	Pathogenic	0.675984
K76F	Pathogenic	0.66037
K76R	Benign	0.425561
K76H	Benign	0.425389
K76S	Pathogenic	0.571617
K76T	Pathogenic	0.570515
K76Y	Pathogenic	0.688034
K76N	Pathogenic	0.529382
K76Q	Pathogenic	0.543274
K76D	Benign	0.475913
K76E	Benign	0.376772
L77A	Benign	0.426335
L77G	Benign	0.46829
L77V	Benign	0.393558
L77C	Benign	0.404113
L77P	Pathogenic	0.579833
L77I	Benign	0.438988
L77M	Benign	0.414361
L77W	Pathogenic	0.557409
L77F	Pathogenic	0.515176
L77K	Pathogenic	0.564904
L77R	Pathogenic	0.572134
L77H	Pathogenic	0.536214
L77S	Benign	0.498909
L77T	Pathogenic	0.500904
L77Y	Pathogenic	0.561349
L77N	Pathogenic	0.517355
L77Q	Pathogenic	0.551549
L77D	Pathogenic	0.53191
L77E	Benign	0.453014
Q78A	Pathogenic	0.703616
Q78G	Benign	0.401197
Q78V	Pathogenic	0.691439
Q78C	Benign	0.423103
Q78P	Pathogenic	0.842705
Q78L	Pathogenic	0.68846
Q78I	Pathogenic	0.683689
Q78M	Pathogenic	0.68345
Q78W	Pathogenic	0.688634
Q78F	Pathogenic	0.67383
Q78K	Benign	0.347615
Q78R	Benign	0.381032
Q78H	Benign	0.380132
Q78S	Benign	0.42714
Q78T	Benign	0.423914
Q78Y	Pathogenic	0.697887
Q78N	Benign	0.312124
Q78D	Benign	0.322897
Q78E	Benign	0.33418
N79A	Pathogenic	0.889871
N79G	Pathogenic	0.717821
N79V	Pathogenic	0.881633
N79C	Pathogenic	0.736606
N79P	Pathogenic	0.898172
N79L	Pathogenic	0.880323
N79I	Pathogenic	0.876137
N79M	Pathogenic	0.878023
N79W	Pathogenic	0.878717
N79F	Pathogenic	0.867688
N79K	Pathogenic	0.743919
N79R	Pathogenic	0.751362
N79H	Pathogenic	0.716982
N79S	Pathogenic	0.746678
N79T	Pathogenic	0.743823
N79Y	Pathogenic	0.884617
N79Q	Pathogenic	0.732742
N79D	Pathogenic	0.650728
N79E	Pathogenic	0.553289
F80A	Pathogenic	0.850514
F80G	Pathogenic	0.842765
F80V	Pathogenic	0.83334
F80C	Pathogenic	0.834611
F80P	Pathogenic	0.896399
F80L	Pathogenic	0.839903
F80I	Pathogenic	0.834632
F80M	Pathogenic	0.842688
F80W	Pathogenic	0.889522
F80K	Pathogenic	0.891617
F80R	Pathogenic	0.895084
F80H	Pathogenic	0.878952
F80S	Pathogenic	0.871781
F80T	Pathogenic	0.874099
F80Y	Pathogenic	0.893998
F80N	Pathogenic	0.868406
F80Q	Pathogenic	0.889346
F80D	Pathogenic	0.873645
F80E	Pathogenic	0.789811
L81A	Pathogenic	0.836788
L81G	Pathogenic	0.838685
L81V	Pathogenic	0.804388
L81C	Pathogenic	0.811159
L81P	Pathogenic	0.898056
L81I	Pathogenic	0.805472
L81M	Pathogenic	0.819101
L81W	Pathogenic	0.891475
L81F	Pathogenic	0.871328
L81K	Pathogenic	0.900281
L81R	Pathogenic	0.904156
L81H	Pathogenic	0.882959
L81S	Pathogenic	0.867058
L81T	Pathogenic	0.869614
L81Y	Pathogenic	0.897955
L81N	Pathogenic	0.868242
L81Q	Pathogenic	0.898112
L81D	Pathogenic	0.875849
L81E	Pathogenic	0.817586
Y82A	Pathogenic	0.808973
Y82G	Pathogenic	0.781435
Y82V	Pathogenic	0.814355
Y82C	Pathogenic	0.800918
Y82P	Pathogenic	0.83333
Y82L	Pathogenic	0.806215
Y82I	Pathogenic	0.807501
Y82M	Pathogenic	0.79798
Y82W	Pathogenic	0.83643
Y82F	Pathogenic	0.825884
Y82K	Pathogenic	0.845031
Y82R	Pathogenic	0.848543
Y82H	Pathogenic	0.81727
Y82S	Pathogenic	0.81439
Y82T	Pathogenic	0.810945
Y82N	Pathogenic	0.804974
Y82Q	Pathogenic	0.837436
Y82D	Pathogenic	0.811634
Y82E	Pathogenic	0.781967
N83A	Pathogenic	0.81904
N83G	Pathogenic	0.712548
N83V	Pathogenic	0.808573
N83C	Pathogenic	0.718584
N83P	Pathogenic	0.844759
N83L	Pathogenic	0.80176
N83I	Pathogenic	0.801334
N83M	Pathogenic	0.796554
N83W	Pathogenic	0.80159
N83F	Pathogenic	0.787245
N83K	Pathogenic	0.73556
N83R	Pathogenic	0.736766
N83H	Pathogenic	0.719274
N83S	Pathogenic	0.724177
N83T	Pathogenic	0.722298
N83Y	Pathogenic	0.814469
N83Q	Pathogenic	0.730083
N83D	Pathogenic	0.693501
N83E	Pathogenic	0.686887
V84A	Pathogenic	0.721075
V84G	Pathogenic	0.742227
V84C	Pathogenic	0.718386
V84P	Pathogenic	0.778096
V84L	Pathogenic	0.708198
V84I	Pathogenic	0.705881
V84M	Pathogenic	0.722303
V84W	Pathogenic	0.795152
V84F	Pathogenic	0.769516
V84K	Pathogenic	0.792187
V84R	Pathogenic	0.796363
V84H	Pathogenic	0.776056
V84S	Pathogenic	0.756568
V84T	Pathogenic	0.754007
V84Y	Pathogenic	0.799421
V84N	Pathogenic	0.780664
V84Q	Pathogenic	0.791231
V84D	Pathogenic	0.776576
V84E	Pathogenic	0.773811
L85A	Pathogenic	0.775525
L85G	Pathogenic	0.771478
L85V	Pathogenic	0.746383
L85C	Pathogenic	0.749266
L85P	Pathogenic	0.844774
L85I	Pathogenic	0.74681
L85M	Pathogenic	0.754259
L85W	Pathogenic	0.839199
L85F	Pathogenic	0.808922
L85K	Pathogenic	0.859162
L85R	Pathogenic	0.865273
L85H	Pathogenic	0.830692
L85S	Pathogenic	0.805062
L85T	Pathogenic	0.806223
L85Y	Pathogenic	0.850217
L85N	Pathogenic	0.814621
L85Q	Pathogenic	0.851495
L85D	Pathogenic	0.822678
L85E	Pathogenic	0.821499
E86A	Pathogenic	0.909948
E86G	Pathogenic	0.767002
E86V	Pathogenic	0.902305
E86C	Pathogenic	0.782316
E86P	Pathogenic	0.920801
E86L	Pathogenic	0.898457
E86I	Pathogenic	0.896771
E86M	Pathogenic	0.897454
E86W	Pathogenic	0.893659
E86F	Pathogenic	0.879582
E86K	Pathogenic	0.770119
E86R	Pathogenic	0.772773
E86H	Pathogenic	0.749297
E86S	Pathogenic	0.796727
E86T	Pathogenic	0.793117
E86Y	Pathogenic	0.900513
E86N	Pathogenic	0.77322
E86Q	Pathogenic	0.807972
E86D	Pathogenic	0.79575
R87A	Pathogenic	0.910508
R87G	Pathogenic	0.831972
R87V	Pathogenic	0.903887
R87C	Pathogenic	0.843331
R87P	Pathogenic	0.918123
R87L	Pathogenic	0.901801
R87I	Pathogenic	0.900205
R87M	Pathogenic	0.902885
R87W	Pathogenic	0.902965
R87F	Pathogenic	0.891122
R87K	Pathogenic	0.741852
R87H	Pathogenic	0.743721
R87S	Pathogenic	0.861602
R87T	Pathogenic	0.858152
R87Y	Pathogenic	0.907498
R87N	Pathogenic	0.821494
R87Q	Pathogenic	0.865401
R87D	Pathogenic	0.835481
R87E	Pathogenic	0.802549
P88A	Pathogenic	0.905496
P88G	Pathogenic	0.882094
P88V	Pathogenic	0.90097
P88C	Pathogenic	0.892873
P88L	Pathogenic	0.900155
P88I	Pathogenic	0.894318
P88M	Pathogenic	0.893368
P88W	Pathogenic	0.908676
P88F	Pathogenic	0.898034
P88K	Pathogenic	0.903992
P88R	Pathogenic	0.906436
P88H	Pathogenic	0.893672
P88S	Pathogenic	0.903169
P88T	Pathogenic	0.910149
P88Y	Pathogenic	0.916354
P88N	Pathogenic	0.880698
P88Q	Pathogenic	0.908743
P88D	Pathogenic	0.886261
P88E	Pathogenic	0.822418
R89A	Pathogenic	0.906091
R89G	Pathogenic	0.824593
R89V	Pathogenic	0.899352
R89C	Pathogenic	0.833938
R89P	Pathogenic	0.924457
R89L	Pathogenic	0.899989
R89I	Pathogenic	0.896102
R89M	Pathogenic	0.899823
R89W	Pathogenic	0.902772
R89F	Pathogenic	0.891489
R89K	Pathogenic	0.729753
R89H	Pathogenic	0.731163
R89S	Pathogenic	0.852284
R89T	Pathogenic	0.849587
R89Y	Pathogenic	0.906398
R89N	Pathogenic	0.813015
R89Q	Pathogenic	0.857358
R89D	Pathogenic	0.839437
R89E	Pathogenic	0.76408
G90A	Pathogenic	0.768169
G90V	Pathogenic	0.760052
G90C	Pathogenic	0.528318
G90P	Pathogenic	0.889402
G90L	Pathogenic	0.758942
G90I	Pathogenic	0.754813
G90M	Pathogenic	0.756946
G90W	Pathogenic	0.751468
G90F	Pathogenic	0.748592
G90K	Pathogenic	0.588934
G90R	Pathogenic	0.595918
G90H	Pathogenic	0.536086
G90S	Pathogenic	0.542934
G90T	Pathogenic	0.536325
G90Y	Pathogenic	0.75699
G90N	Pathogenic	0.50808
G90Q	Pathogenic	0.551624
G90D	Pathogenic	0.508191
G90E	Pathogenic	0.526082
W91A	Benign	0.497094
W91G	Benign	0.416047
W91V	Pathogenic	0.52492
W91C	Pathogenic	0.514253
W91P	Pathogenic	0.619353
W91L	Pathogenic	0.536448
W91I	Pathogenic	0.528205
W91M	Pathogenic	0.519104
W91F	Pathogenic	0.544599
W91K	Benign	0.494874
W91R	Pathogenic	0.543556
W91H	Benign	0.470135
W91S	Benign	0.448415
W91T	Benign	0.461539
W91Y	Pathogenic	0.502385
W91N	Benign	0.457731
W91Q	Benign	0.480413
W91D	Benign	0.475465
W91E	Benign	0.494791
A92G	Pathogenic	0.779859
A92V	Pathogenic	0.810167
A92C	Pathogenic	0.79872
A92P	Pathogenic	0.860951
A92L	Pathogenic	0.80883
A92I	Pathogenic	0.804357
A92M	Pathogenic	0.78524
A92W	Pathogenic	0.859159
A92F	Pathogenic	0.848412
A92K	Pathogenic	0.865109
A92R	Pathogenic	0.869104
A92H	Pathogenic	0.847209
A92S	Pathogenic	0.804334
A92T	Pathogenic	0.829534
A92Y	Pathogenic	0.865121
A92N	Pathogenic	0.851082
A92Q	Pathogenic	0.8695
A92D	Pathogenic	0.847935
A92E	Pathogenic	0.831914
F93A	Pathogenic	0.858096
F93G	Pathogenic	0.874071
F93V	Pathogenic	0.856476
F93C	Pathogenic	0.863638
F93P	Pathogenic	0.916274
F93L	Pathogenic	0.882215
F93I	Pathogenic	0.877211
F93M	Pathogenic	0.872382
F93W	Pathogenic	0.909934
F93K	Pathogenic	0.89963
F93R	Pathogenic	0.902123
F93H	Pathogenic	0.897613
F93S	Pathogenic	0.905316
F93T	Pathogenic	0.907474
F93Y	Pathogenic	0.902594
F93N	Pathogenic	0.903145
F93Q	Pathogenic	0.9092
F93D	Pathogenic	0.890519
F93E	Pathogenic	0.877249
I94A	Pathogenic	0.879192
I94G	Pathogenic	0.901893
I94V	Pathogenic	0.844922
I94C	Pathogenic	0.863492
I94P	Pathogenic	0.921457
I94L	Pathogenic	0.872797
I94M	Pathogenic	0.875192
I94W	Pathogenic	0.915735
I94F	Pathogenic	0.900975
I94K	Pathogenic	0.908103
I94R	Pathogenic	0.910422
I94H	Pathogenic	0.90744
I94S	Pathogenic	0.909783
I94T	Pathogenic	0.915223
I94Y	Pathogenic	0.911949
I94N	Pathogenic	0.904537
I94Q	Pathogenic	0.913279
I94D	Pathogenic	0.89959
I94E	Pathogenic	0.882459
Y95A	Pathogenic	0.853388
Y95G	Pathogenic	0.828632
Y95V	Pathogenic	0.854793
Y95C	Pathogenic	0.85346
Y95P	Pathogenic	0.854184
Y95L	Pathogenic	0.856956
Y95I	Pathogenic	0.855358
Y95M	Pathogenic	0.846561
Y95W	Pathogenic	0.865213
Y95F	Pathogenic	0.867409
Y95K	Pathogenic	0.868105
Y95R	Pathogenic	0.87112
Y95H	Pathogenic	0.855099
Y95S	Pathogenic	0.832526
Y95T	Pathogenic	0.847947
Y95N	Pathogenic	0.849797
Y95Q	Pathogenic	0.86169
Y95D	Pathogenic	0.853501
Y95E	Pathogenic	0.834619
H96A	Pathogenic	0.930957
H96G	Pathogenic	0.864769
H96V	Pathogenic	0.926739
H96C	Pathogenic	0.866968
H96P	Pathogenic	0.936158
H96L	Pathogenic	0.925253
H96I	Pathogenic	0.924779
H96M	Pathogenic	0.917048
H96W	Pathogenic	0.92692
H96F	Pathogenic	0.920889
H96K	Pathogenic	0.705727
H96R	Pathogenic	0.709163
H96S	Pathogenic	0.889109
H96T	Pathogenic	0.887006
H96Y	Pathogenic	0.928777
H96N	Pathogenic	0.861896
H96Q	Pathogenic	0.893016
H96D	Pathogenic	0.842179
H96E	Pathogenic	0.827607
A97G	Benign	0.255381
A97V	Benign	0.247142
A97C	Benign	0.243325
A97P	Benign	0.47859
A97L	Benign	0.243073
A97I	Benign	0.238131
A97M	Benign	0.240999
A97W	Benign	0.328443
A97F	Benign	0.303918
A97K	Benign	0.366359
A97R	Benign	0.370331
A97H	Benign	0.335911
A97S	Benign	0.286888
A97T	Benign	0.285845
A97Y	Benign	0.340602
A97N	Benign	0.322345
A97Q	Benign	0.355596
A97D	Benign	0.338417
A97E	Benign	0.457791
Y98A	Pathogenic	0.836074
Y98G	Pathogenic	0.831837
Y98V	Pathogenic	0.823062
Y98C	Pathogenic	0.82369
Y98P	Pathogenic	0.880039
Y98L	Pathogenic	0.820267
Y98I	Pathogenic	0.817767
Y98M	Pathogenic	0.801637
Y98W	Pathogenic	0.843613
Y98F	Pathogenic	0.833291
Y98K	Pathogenic	0.880244
Y98R	Pathogenic	0.884176
Y98H	Pathogenic	0.867929
Y98S	Pathogenic	0.848814
Y98T	Pathogenic	0.847977
Y98N	Pathogenic	0.857256
Y98Q	Pathogenic	0.874202
Y98D	Pathogenic	0.865215
Y98E	Pathogenic	0.87679
V99A	Pathogenic	0.780012
V99G	Pathogenic	0.816599
V99C	Pathogenic	0.774832
V99P	Pathogenic	0.867567
V99L	Pathogenic	0.763117
V99I	Pathogenic	0.748018
V99M	Pathogenic	0.76423
V99W	Pathogenic	0.836898
V99F	Pathogenic	0.7933
V99K	Pathogenic	0.856074
V99R	Pathogenic	0.857215
V99H	Pathogenic	0.843479
V99S	Pathogenic	0.850831
V99T	Pathogenic	0.845818
V99Y	Pathogenic	0.846876
V99N	Pathogenic	0.817343
V99Q	Pathogenic	0.855705
V99D	Pathogenic	0.822191
V99E	Pathogenic	0.801934
F100A	Pathogenic	0.934382
F100G	Pathogenic	0.939681
F100V	Pathogenic	0.926706
F100C	Pathogenic	0.934258
F100P	Pathogenic	0.941144
F100L	Pathogenic	0.927426
F100I	Pathogenic	0.923386
F100M	Pathogenic	0.931329
F100W	Pathogenic	0.940346
F100K	Pathogenic	0.944331
F100R	Pathogenic	0.944484
F100H	Pathogenic	0.943625
F100S	Pathogenic	0.941925
F100T	Pathogenic	0.941708
F100Y	Pathogenic	0.938848
F100N	Pathogenic	0.942646
F100Q	Pathogenic	0.944033
F100D	Pathogenic	0.943481
F100E	Pathogenic	0.931863
L101A	Pathogenic	0.931423
L101G	Pathogenic	0.933653
L101V	Pathogenic	0.923365
L101C	Pathogenic	0.929426
L101P	Pathogenic	0.940123
L101I	Pathogenic	0.921872
L101M	Pathogenic	0.928191
L101W	Pathogenic	0.935857
L101F	Pathogenic	0.93401
L101K	Pathogenic	0.937366
L101R	Pathogenic	0.937457
L101H	Pathogenic	0.936712
L101S	Pathogenic	0.935523
L101T	Pathogenic	0.937409
L101Y	Pathogenic	0.935021
L101N	Pathogenic	0.935598
L101Q	Pathogenic	0.937103
L101D	Pathogenic	0.936491
L101E	Pathogenic	0.927006
L102A	Pathogenic	0.908596
L102G	Pathogenic	0.920101
L102V	Pathogenic	0.892541
L102C	Pathogenic	0.90317
L102P	Pathogenic	0.933139
L102I	Pathogenic	0.906341
L102M	Pathogenic	0.908292
L102W	Pathogenic	0.928937
L102F	Pathogenic	0.921372
L102K	Pathogenic	0.922711
L102R	Pathogenic	0.922866
L102H	Pathogenic	0.921502
L102S	Pathogenic	0.923554
L102T	Pathogenic	0.927357
L102Y	Pathogenic	0.924081
L102N	Pathogenic	0.923592
L102Q	Pathogenic	0.926394
L102D	Pathogenic	0.918873
L102E	Pathogenic	0.903306
V103A	Pathogenic	0.87214
V103G	Pathogenic	0.874182
V103C	Pathogenic	0.856354
V103P	Pathogenic	0.904721
V103L	Pathogenic	0.835418
V103I	Pathogenic	0.819023
V103M	Pathogenic	0.830572
V103W	Pathogenic	0.877327
V103F	Pathogenic	0.850197
V103K	Pathogenic	0.910708
V103R	Pathogenic	0.910077
V103H	Pathogenic	0.89971
V103S	Pathogenic	0.900137
V103T	Pathogenic	0.897589
V103Y	Pathogenic	0.888793
V103N	Pathogenic	0.879659
V103Q	Pathogenic	0.906588
V103D	Pathogenic	0.893395
V103E	Pathogenic	0.883356
F104A	Pathogenic	0.902385
F104G	Pathogenic	0.912957
F104V	Pathogenic	0.885502
F104C	Pathogenic	0.899388
F104P	Pathogenic	0.923326
F104L	Pathogenic	0.886392
F104I	Pathogenic	0.881117
F104M	Pathogenic	0.887639
F104W	Pathogenic	0.92071
F104K	Pathogenic	0.929537
F104R	Pathogenic	0.930037
F104H	Pathogenic	0.926842
F104S	Pathogenic	0.923149
F104T	Pathogenic	0.922351
F104Y	Pathogenic	0.92065
F104N	Pathogenic	0.92295
F104Q	Pathogenic	0.928416
F104D	Pathogenic	0.925769
F104E	Pathogenic	0.917706
S105A	Pathogenic	0.882088
S105G	Pathogenic	0.774014
S105V	Pathogenic	0.880726
S105C	Pathogenic	0.766475
S105P	Pathogenic	0.940117
S105L	Pathogenic	0.880239
S105I	Pathogenic	0.879828
S105M	Pathogenic	0.869929
S105W	Pathogenic	0.878665
S105F	Pathogenic	0.8781
S105K	Pathogenic	0.810997
S105R	Pathogenic	0.816572
S105H	Pathogenic	0.804773
S105T	Pathogenic	0.787113
S105Y	Pathogenic	0.879873
S105N	Pathogenic	0.795494
S105Q	Pathogenic	0.809919
S105D	Pathogenic	0.797996
S105E	Pathogenic	0.846606
C106A	Pathogenic	0.911992
C106G	Pathogenic	0.894956
C106V	Pathogenic	0.912412
C106P	Pathogenic	0.935102
[truncated: 14,569 more rows]
