# Supplementary material for: MLe-KCNQ2: An Artificial Intelligence Model for the Prognosis of Missense KCNQ2 Gene Variants
Source: Int J Mol Sci. 2024 Mar 2;25(5):2910. doi: 10.3390/ijms25052910 (PMC10932340; doi:10.3390/ijms25052910)
Supplement: Supplementary file 1 [file ijms-25-02910-s001.zip › Supp_Data_5_All_Possible_Predictions.csv]

	Variant	Prediction	Score	Init_Codon	Final_Codon
0	M1A	Pathogenic	0.8687973908052042	AUG	GCU
1	M1A	Pathogenic	0.8687973908052042	AUG	GCC
2	M1A	Pathogenic	0.8687973908052042	AUG	GCA
3	M1A	Pathogenic	0.8687973908052042	AUG	GAG
4	M1G	Pathogenic	0.8752990077049172	AUG	GGU
5	M1G	Pathogenic	0.8752990077049172	AUG	GGC
6	M1G	Pathogenic	0.8752990077049172	AUG	GGA
7	M1G	Pathogenic	0.8752990077049172	AUG	GGG
8	M1V	Pathogenic	0.9116516382026747	AUG	GUU
9	M1V	Pathogenic	0.9116516382026747	AUG	GUC
10	M1V	Pathogenic	0.9116516382026747	AUG	GUA
11	M1V	Pathogenic	0.9116516382026747	AUG	GUG
12	M1C	Pathogenic	0.9025045033634631	AUG	UGU
13	M1C	Pathogenic	0.9025045033634631	AUG	UGC
14	M1P	Pathogenic	0.9004049584618294	AUG	CCU
15	M1P	Pathogenic	0.9004049584618294	AUG	CCC
16	M1P	Pathogenic	0.9004049584618294	AUG	CCA
17	M1P	Pathogenic	0.9004049584618294	AUG	CCG
18	M1L	Pathogenic	0.9150623830862501	AUG	UUA
19	M1L	Pathogenic	0.9150623830862501	AUG	UUG
20	M1L	Pathogenic	0.9150623830862501	AUG	CUU
21	M1L	Pathogenic	0.9150623830862501	AUG	CUC
22	M1L	Pathogenic	0.9150623830862501	AUG	CUA
23	M1L	Pathogenic	0.9150623830862501	AUG	CUG
24	M1I	Pathogenic	0.9169017217227076	AUG	AUU
25	M1I	Pathogenic	0.9169017217227076	AUG	AUC
26	M1I	Pathogenic	0.9169017217227076	AUG	AUA
27	M1W	Pathogenic	0.9015818865402296	AUG	UGG
28	M1F	Pathogenic	0.9002131200751283	AUG	UUU
29	M1F	Pathogenic	0.9002131200751283	AUG	UUC
30	M1K	Pathogenic	0.9040594745948792	AUG	ACA
31	M1K	Pathogenic	0.9040594745948792	AUG	ACG
32	M1R	Pathogenic	0.9059478856406691	AUG	CGU
33	M1R	Pathogenic	0.9059478856406691	AUG	CGC
34	M1R	Pathogenic	0.9059478856406691	AUG	CGA
35	M1R	Pathogenic	0.9059478856406691	AUG	CGG
36	M1R	Pathogenic	0.9059478856406691	AUG	AGA
37	M1R	Pathogenic	0.9059478856406691	AUG	AGG
38	M1H	Pathogenic	0.9061966264164276	AUG	CAU
39	M1H	Pathogenic	0.9061966264164276	AUG	CAC
40	M1S	Pathogenic	0.8830094174980739	AUG	UCU
41	M1S	Pathogenic	0.8830094174980739	AUG	UCC
42	M1S	Pathogenic	0.8830094174980739	AUG	UCA
43	M1S	Pathogenic	0.8830094174980739	AUG	UCG
44	M1S	Pathogenic	0.8830094174980739	AUG	AGU
45	M1S	Pathogenic	0.8830094174980739	AUG	AGC
46	M1T	Pathogenic	0.8902751603119703	AUG	ACU
47	M1T	Pathogenic	0.8902751603119703	AUG	ACC
48	M1T	Pathogenic	0.8902751603119703	AUG	ACA
49	M1T	Pathogenic	0.8902751603119703	AUG	ACG
50	M1Y	Pathogenic	0.8874945452742726	AUG	UAU
51	M1Y	Pathogenic	0.8874945452742726	AUG	UAC
52	M1N	Pathogenic	0.9016113068654965	AUG	ACU
53	M1N	Pathogenic	0.9016113068654965	AUG	ACC
54	M1Q	Pathogenic	0.9041238221738166	AUG	CAA
55	M1Q	Pathogenic	0.9041238221738166	AUG	CAG
56	M1D	Pathogenic	0.8997426044635788	AUG	GAU
57	M1D	Pathogenic	0.8997426044635788	AUG	GAC
58	M1E	Pathogenic	0.7712472142387619	AUG	GAA
59	M1E	Pathogenic	0.7712472142387619	AUG	GCG
60	V2A	Benign	0.0590120803787236	GUU	GCU
61	V2A	Benign	0.0590120803787236	GUU	GCC
62	V2A	Benign	0.0590120803787236	GUU	GCA
63	V2A	Benign	0.0590120803787236	GUU	GAG
64	V2A	Benign	0.0590120803787236	GUC	GCU
65	V2A	Benign	0.0590120803787236	GUC	GCC
66	V2A	Benign	0.0590120803787236	GUC	GCA
67	V2A	Benign	0.0590120803787236	GUC	GAG
68	V2A	Benign	0.0590120803787236	GUA	GCU
69	V2A	Benign	0.0590120803787236	GUA	GCC
70	V2A	Benign	0.0590120803787236	GUA	GCA
71	V2A	Benign	0.0590120803787236	GUA	GAG
72	V2A	Benign	0.0590120803787236	GUG	GCU
73	V2A	Benign	0.0590120803787236	GUG	GCC
74	V2A	Benign	0.0590120803787236	GUG	GCA
75	V2A	Benign	0.0590120803787236	GUG	GAG
76	V2G	Benign	0.07380924058885416	GUU	GGU
77	V2G	Benign	0.07380924058885416	GUU	GGC
78	V2G	Benign	0.07380924058885416	GUU	GGA
79	V2G	Benign	0.07380924058885416	GUU	GGG
80	V2G	Benign	0.07380924058885416	GUC	GGU
81	V2G	Benign	0.07380924058885416	GUC	GGC
82	V2G	Benign	0.07380924058885416	GUC	GGA
83	V2G	Benign	0.07380924058885416	GUC	GGG
84	V2G	Benign	0.07380924058885416	GUA	GGU
85	V2G	Benign	0.07380924058885416	GUA	GGC
86	V2G	Benign	0.07380924058885416	GUA	GGA
87	V2G	Benign	0.07380924058885416	GUA	GGG
88	V2G	Benign	0.07380924058885416	GUG	GGU
89	V2G	Benign	0.07380924058885416	GUG	GGC
90	V2G	Benign	0.07380924058885416	GUG	GGA
91	V2G	Benign	0.07380924058885416	GUG	GGG
92	V2C	Benign	0.05711210274697993	GUU	UGU
93	V2C	Benign	0.05711210274697993	GUU	UGC
94	V2C	Benign	0.05711210274697993	GUC	UGU
95	V2C	Benign	0.05711210274697993	GUC	UGC
96	V2C	Benign	0.05711210274697993	GUA	UGU
97	V2C	Benign	0.05711210274697993	GUA	UGC
98	V2C	Benign	0.05711210274697993	GUG	UGU
99	V2C	Benign	0.05711210274697993	GUG	UGC
100	V2P	Benign	0.1923063248477617	GUU	CCU
101	V2P	Benign	0.1923063248477617	GUU	CCC
102	V2P	Benign	0.1923063248477617	GUU	CCA
103	V2P	Benign	0.1923063248477617	GUU	CCG
104	V2P	Benign	0.1923063248477617	GUC	CCU
105	V2P	Benign	0.1923063248477617	GUC	CCC
106	V2P	Benign	0.1923063248477617	GUC	CCA
107	V2P	Benign	0.1923063248477617	GUC	CCG
108	V2P	Benign	0.1923063248477617	GUA	CCU
109	V2P	Benign	0.1923063248477617	GUA	CCC
110	V2P	Benign	0.1923063248477617	GUA	CCA
111	V2P	Benign	0.1923063248477617	GUA	CCG
112	V2P	Benign	0.1923063248477617	GUG	CCU
113	V2P	Benign	0.1923063248477617	GUG	CCC
114	V2P	Benign	0.1923063248477617	GUG	CCA
115	V2P	Benign	0.1923063248477617	GUG	CCG
116	V2L	Benign	0.05618902663463054	GUU	UUA
117	V2L	Benign	0.05618902663463054	GUU	UUG
118	V2L	Benign	0.05618902663463054	GUU	CUU
119	V2L	Benign	0.05618902663463054	GUU	CUC
120	V2L	Benign	0.05618902663463054	GUU	CUA
121	V2L	Benign	0.05618902663463054	GUU	CUG
122	V2L	Benign	0.05618902663463054	GUC	UUA
123	V2L	Benign	0.05618902663463054	GUC	UUG
124	V2L	Benign	0.05618902663463054	GUC	CUU
125	V2L	Benign	0.05618902663463054	GUC	CUC
126	V2L	Benign	0.05618902663463054	GUC	CUA
127	V2L	Benign	0.05618902663463054	GUC	CUG
128	V2L	Benign	0.05618902663463054	GUA	UUA
129	V2L	Benign	0.05618902663463054	GUA	UUG
130	V2L	Benign	0.05618902663463054	GUA	CUU
131	V2L	Benign	0.05618902663463054	GUA	CUC
132	V2L	Benign	0.05618902663463054	GUA	CUA
133	V2L	Benign	0.05618902663463054	GUA	CUG
134	V2L	Benign	0.05618902663463054	GUG	UUA
135	V2L	Benign	0.05618902663463054	GUG	UUG
136	V2L	Benign	0.05618902663463054	GUG	CUU
137	V2L	Benign	0.05618902663463054	GUG	CUC
138	V2L	Benign	0.05618902663463054	GUG	CUA
139	V2L	Benign	0.05618902663463054	GUG	CUG
140	V2I	Benign	0.05757112942557299	GUU	AUU
141	V2I	Benign	0.05757112942557299	GUU	AUC
142	V2I	Benign	0.05757112942557299	GUU	AUA
143	V2I	Benign	0.05757112942557299	GUC	AUU
144	V2I	Benign	0.05757112942557299	GUC	AUC
145	V2I	Benign	0.05757112942557299	GUC	AUA
146	V2I	Benign	0.05757112942557299	GUA	AUU
147	V2I	Benign	0.05757112942557299	GUA	AUC
148	V2I	Benign	0.05757112942557299	GUA	AUA
149	V2I	Benign	0.05757112942557299	GUG	AUU
150	V2I	Benign	0.05757112942557299	GUG	AUC
151	V2I	Benign	0.05757112942557299	GUG	AUA
152	V2M	Benign	0.05803323479532899	GUU	AUG
153	V2M	Benign	0.05803323479532899	GUC	AUG
154	V2M	Benign	0.05803323479532899	GUA	AUG
155	V2M	Benign	0.05803323479532899	GUG	AUG
156	V2W	Benign	0.1468525696863442	GUU	UGG
157	V2W	Benign	0.1468525696863442	GUC	UGG
158	V2W	Benign	0.1468525696863442	GUA	UGG
159	V2W	Benign	0.1468525696863442	GUG	UGG
160	V2F	Benign	0.1219181083287307	GUU	UUU
161	V2F	Benign	0.1219181083287307	GUU	UUC
162	V2F	Benign	0.1219181083287307	GUC	UUU
163	V2F	Benign	0.1219181083287307	GUC	UUC
164	V2F	Benign	0.1219181083287307	GUA	UUU
165	V2F	Benign	0.1219181083287307	GUA	UUC
166	V2F	Benign	0.1219181083287307	GUG	UUU
167	V2F	Benign	0.1219181083287307	GUG	UUC
168	V2K	Benign	0.1304038973121916	GUU	ACA
169	V2K	Benign	0.1304038973121916	GUU	ACG
170	V2K	Benign	0.1304038973121916	GUC	ACA
171	V2K	Benign	0.1304038973121916	GUC	ACG
172	V2K	Benign	0.1304038973121916	GUA	ACA
173	V2K	Benign	0.1304038973121916	GUA	ACG
174	V2K	Benign	0.1304038973121916	GUG	ACA
175	V2K	Benign	0.1304038973121916	GUG	ACG
176	V2R	Benign	0.1372057784811634	GUU	CGU
177	V2R	Benign	0.1372057784811634	GUU	CGC
178	V2R	Benign	0.1372057784811634	GUU	CGA
179	V2R	Benign	0.1372057784811634	GUU	CGG
180	V2R	Benign	0.1372057784811634	GUU	AGA
181	V2R	Benign	0.1372057784811634	GUU	AGG
182	V2R	Benign	0.1372057784811634	GUC	CGU
183	V2R	Benign	0.1372057784811634	GUC	CGC
184	V2R	Benign	0.1372057784811634	GUC	CGA
185	V2R	Benign	0.1372057784811634	GUC	CGG
186	V2R	Benign	0.1372057784811634	GUC	AGA
187	V2R	Benign	0.1372057784811634	GUC	AGG
188	V2R	Benign	0.1372057784811634	GUA	CGU
189	V2R	Benign	0.1372057784811634	GUA	CGC
190	V2R	Benign	0.1372057784811634	GUA	CGA
191	V2R	Benign	0.1372057784811634	GUA	CGG
192	V2R	Benign	0.1372057784811634	GUA	AGA
193	V2R	Benign	0.1372057784811634	GUA	AGG
194	V2R	Benign	0.1372057784811634	GUG	CGU
195	V2R	Benign	0.1372057784811634	GUG	CGC
196	V2R	Benign	0.1372057784811634	GUG	CGA
197	V2R	Benign	0.1372057784811634	GUG	CGG
198	V2R	Benign	0.1372057784811634	GUG	AGA
199	V2R	Benign	0.1372057784811634	GUG	AGG
200	V2H	Benign	0.111448971280468	GUU	CAU
201	V2H	Benign	0.111448971280468	GUU	CAC
202	V2H	Benign	0.111448971280468	GUC	CAU
203	V2H	Benign	0.111448971280468	GUC	CAC
204	V2H	Benign	0.111448971280468	GUA	CAU
205	V2H	Benign	0.111448971280468	GUA	CAC
206	V2H	Benign	0.111448971280468	GUG	CAU
207	V2H	Benign	0.111448971280468	GUG	CAC
208	V2S	Benign	0.07825573020736024	GUU	UCU
209	V2S	Benign	0.07825573020736024	GUU	UCC
210	V2S	Benign	0.07825573020736024	GUU	UCA
211	V2S	Benign	0.07825573020736024	GUU	UCG
212	V2S	Benign	0.07825573020736024	GUU	AGU
213	V2S	Benign	0.07825573020736024	GUU	AGC
214	V2S	Benign	0.07825573020736024	GUC	UCU
215	V2S	Benign	0.07825573020736024	GUC	UCC
216	V2S	Benign	0.07825573020736024	GUC	UCA
217	V2S	Benign	0.07825573020736024	GUC	UCG
218	V2S	Benign	0.07825573020736024	GUC	AGU
219	V2S	Benign	0.07825573020736024	GUC	AGC
220	V2S	Benign	0.07825573020736024	GUA	UCU
221	V2S	Benign	0.07825573020736024	GUA	UCC
222	V2S	Benign	0.07825573020736024	GUA	UCA
223	V2S	Benign	0.07825573020736024	GUA	UCG
224	V2S	Benign	0.07825573020736024	GUA	AGU
225	V2S	Benign	0.07825573020736024	GUA	AGC
226	V2S	Benign	0.07825573020736024	GUG	UCU
227	V2S	Benign	0.07825573020736024	GUG	UCC
228	V2S	Benign	0.07825573020736024	GUG	UCA
229	V2S	Benign	0.07825573020736024	GUG	UCG
230	V2S	Benign	0.07825573020736024	GUG	AGU
231	V2S	Benign	0.07825573020736024	GUG	AGC
232	V2T	Benign	0.07302277529957531	GUU	ACU
233	V2T	Benign	0.07302277529957531	GUU	ACC
234	V2T	Benign	0.07302277529957531	GUU	ACA
235	V2T	Benign	0.07302277529957531	GUU	ACG
236	V2T	Benign	0.07302277529957531	GUC	ACU
237	V2T	Benign	0.07302277529957531	GUC	ACC
238	V2T	Benign	0.07302277529957531	GUC	ACA
239	V2T	Benign	0.07302277529957531	GUC	ACG
240	V2T	Benign	0.07302277529957531	GUA	ACU
241	V2T	Benign	0.07302277529957531	GUA	ACC
242	V2T	Benign	0.07302277529957531	GUA	ACA
243	V2T	Benign	0.07302277529957531	GUA	ACG
244	V2T	Benign	0.07302277529957531	GUG	ACU
245	V2T	Benign	0.07302277529957531	GUG	ACC
246	V2T	Benign	0.07302277529957531	GUG	ACA
247	V2T	Benign	0.07302277529957531	GUG	ACG
248	V2Y	Benign	0.1496348691833832	GUU	UAU
249	V2Y	Benign	0.1496348691833832	GUU	UAC
250	V2Y	Benign	0.1496348691833832	GUC	UAU
251	V2Y	Benign	0.1496348691833832	GUC	UAC
252	V2Y	Benign	0.1496348691833832	GUA	UAU
253	V2Y	Benign	0.1496348691833832	GUA	UAC
254	V2Y	Benign	0.1496348691833832	GUG	UAU
255	V2Y	Benign	0.1496348691833832	GUG	UAC
256	V2N	Benign	0.1201536307219653	GUU	ACU
257	V2N	Benign	0.1201536307219653	GUU	ACC
258	V2N	Benign	0.1201536307219653	GUC	ACU
259	V2N	Benign	0.1201536307219653	GUC	ACC
260	V2N	Benign	0.1201536307219653	GUA	ACU
261	V2N	Benign	0.1201536307219653	GUA	ACC
262	V2N	Benign	0.1201536307219653	GUG	ACU
263	V2N	Benign	0.1201536307219653	GUG	ACC
264	V2Q	Benign	0.1178459390613861	GUU	CAA
265	V2Q	Benign	0.1178459390613861	GUU	CAG
266	V2Q	Benign	0.1178459390613861	GUC	CAA
267	V2Q	Benign	0.1178459390613861	GUC	CAG
268	V2Q	Benign	0.1178459390613861	GUA	CAA
269	V2Q	Benign	0.1178459390613861	GUA	CAG
270	V2Q	Benign	0.1178459390613861	GUG	CAA
271	V2Q	Benign	0.1178459390613861	GUG	CAG
272	V2D	Benign	0.1206072237262978	GUU	GAU
273	V2D	Benign	0.1206072237262978	GUU	GAC
274	V2D	Benign	0.1206072237262978	GUC	GAU
275	V2D	Benign	0.1206072237262978	GUC	GAC
276	V2D	Benign	0.1206072237262978	GUA	GAU
277	V2D	Benign	0.1206072237262978	GUA	GAC
278	V2D	Benign	0.1206072237262978	GUG	GAU
279	V2D	Benign	0.1206072237262978	GUG	GAC
280	V2E	Benign	0.1179666080054912	GUU	GAA
281	V2E	Benign	0.1179666080054912	GUU	GCG
282	V2E	Benign	0.1179666080054912	GUC	GAA
283	V2E	Benign	0.1179666080054912	GUC	GCG
284	V2E	Benign	0.1179666080054912	GUA	GAA
285	V2E	Benign	0.1179666080054912	GUA	GCG
286	V2E	Benign	0.1179666080054912	GUG	GAA
287	V2E	Benign	0.1179666080054912	GUG	GCG
288	Q3A	Benign	0.290737802989631	CAA	GCU
289	Q3A	Benign	0.290737802989631	CAA	GCC
290	Q3A	Benign	0.290737802989631	CAA	GCA
291	Q3A	Benign	0.290737802989631	CAA	GAG
292	Q3A	Benign	0.290737802989631	CAG	GCU
293	Q3A	Benign	0.290737802989631	CAG	GCC
294	Q3A	Benign	0.290737802989631	CAG	GCA
295	Q3A	Benign	0.290737802989631	CAG	GAG
296	Q3G	Benign	0.08338381774844968	CAA	GGU
297	Q3G	Benign	0.08338381774844968	CAA	GGC
298	Q3G	Benign	0.08338381774844968	CAA	GGA
299	Q3G	Benign	0.08338381774844968	CAA	GGG
300	Q3G	Benign	0.08338381774844968	CAG	GGU
301	Q3G	Benign	0.08338381774844968	CAG	GGC
302	Q3G	Benign	0.08338381774844968	CAG	GGA
303	Q3G	Benign	0.08338381774844968	CAG	GGG
304	Q3V	Benign	0.2787375861836209	CAA	GUU
305	Q3V	Benign	0.2787375861836209	CAA	GUC
306	Q3V	Benign	0.2787375861836209	CAA	GUA
307	Q3V	Benign	0.2787375861836209	CAA	GUG
308	Q3V	Benign	0.2787375861836209	CAG	GUU
309	Q3V	Benign	0.2787375861836209	CAG	GUC
310	Q3V	Benign	0.2787375861836209	CAG	GUA
311	Q3V	Benign	0.2787375861836209	CAG	GUG
312	Q3C	Benign	0.09302964625634816	CAA	UGU
313	Q3C	Benign	0.09302964625634816	CAA	UGC
314	Q3C	Benign	0.09302964625634816	CAG	UGU
315	Q3C	Benign	0.09302964625634816	CAG	UGC
316	Q3P	Benign	0.4068056674594016	CAA	CCU
317	Q3P	Benign	0.4068056674594016	CAA	CCC
318	Q3P	Benign	0.4068056674594016	CAA	CCA
319	Q3P	Benign	0.4068056674594016	CAA	CCG
320	Q3P	Benign	0.4068056674594016	CAG	CCU
321	Q3P	Benign	0.4068056674594016	CAG	CCC
322	Q3P	Benign	0.4068056674594016	CAG	CCA
323	Q3P	Benign	0.4068056674594016	CAG	CCG
324	Q3L	Benign	0.2728677236642736	CAA	UUA
325	Q3L	Benign	0.2728677236642736	CAA	UUG
326	Q3L	Benign	0.2728677236642736	CAA	CUU
327	Q3L	Benign	0.2728677236642736	CAA	CUC
328	Q3L	Benign	0.2728677236642736	CAA	CUA
329	Q3L	Benign	0.2728677236642736	CAA	CUG
330	Q3L	Benign	0.2728677236642736	CAG	UUA
331	Q3L	Benign	0.2728677236642736	CAG	UUG
332	Q3L	Benign	0.2728677236642736	CAG	CUU
333	Q3L	Benign	0.2728677236642736	CAG	CUC
334	Q3L	Benign	0.2728677236642736	CAG	CUA
335	Q3L	Benign	0.2728677236642736	CAG	CUG
336	Q3I	Benign	0.2737275810816002	CAA	AUU
337	Q3I	Benign	0.2737275810816002	CAA	AUC
338	Q3I	Benign	0.2737275810816002	CAA	AUA
339	Q3I	Benign	0.2737275810816002	CAG	AUU
340	Q3I	Benign	0.2737275810816002	CAG	AUC
341	Q3I	Benign	0.2737275810816002	CAG	AUA
342	Q3M	Benign	0.2691522317287212	CAA	AUG
343	Q3M	Benign	0.2691522317287212	CAG	AUG
344	Q3W	Benign	0.2778665082774017	CAA	UGG
345	Q3W	Benign	0.2778665082774017	CAG	UGG
346	Q3F	Benign	0.2630336897028667	CAA	UUU
347	Q3F	Benign	0.2630336897028667	CAA	UUC
348	Q3F	Benign	0.2630336897028667	CAG	UUU
349	Q3F	Benign	0.2630336897028667	CAG	UUC
350	Q3K	Benign	0.09647352478764612	CAA	ACA
351	Q3K	Benign	0.09647352478764612	CAA	ACG
352	Q3K	Benign	0.09647352478764612	CAG	ACA
353	Q3K	Benign	0.09647352478764612	CAG	ACG
354	Q3R	Benign	0.09678601585211591	CAA	CGU
355	Q3R	Benign	0.09678601585211591	CAA	CGC
356	Q3R	Benign	0.09678601585211591	CAA	CGA
357	Q3R	Benign	0.09678601585211591	CAA	CGG
358	Q3R	Benign	0.09678601585211591	CAA	AGA
359	Q3R	Benign	0.09678601585211591	CAA	AGG
360	Q3R	Benign	0.09678601585211591	CAG	CGU
361	Q3R	Benign	0.09678601585211591	CAG	CGC
362	Q3R	Benign	0.09678601585211591	CAG	CGA
363	Q3R	Benign	0.09678601585211591	CAG	CGG
364	Q3R	Benign	0.09678601585211591	CAG	AGA
365	Q3R	Benign	0.09678601585211591	CAG	AGG
366	Q3H	Benign	0.08775421728855626	CAA	CAU
367	Q3H	Benign	0.08775421728855626	CAA	CAC
368	Q3H	Benign	0.08775421728855626	CAG	CAU
369	Q3H	Benign	0.08775421728855626	CAG	CAC
370	Q3S	Benign	0.09249861490073877	CAA	UCU
371	Q3S	Benign	0.09249861490073877	CAA	UCC
372	Q3S	Benign	0.09249861490073877	CAA	UCA
373	Q3S	Benign	0.09249861490073877	CAA	UCG
374	Q3S	Benign	0.09249861490073877	CAA	AGU
375	Q3S	Benign	0.09249861490073877	CAA	AGC
376	Q3S	Benign	0.09249861490073877	CAG	UCU
377	Q3S	Benign	0.09249861490073877	CAG	UCC
378	Q3S	Benign	0.09249861490073877	CAG	UCA
379	Q3S	Benign	0.09249861490073877	CAG	UCG
380	Q3S	Benign	0.09249861490073877	CAG	AGU
381	Q3S	Benign	0.09249861490073877	CAG	AGC
382	Q3T	Benign	0.0910236950012286	CAA	ACU
383	Q3T	Benign	0.0910236950012286	CAA	ACC
384	Q3T	Benign	0.0910236950012286	CAA	ACA
385	Q3T	Benign	0.0910236950012286	CAA	ACG
386	Q3T	Benign	0.0910236950012286	CAG	ACU
387	Q3T	Benign	0.0910236950012286	CAG	ACC
388	Q3T	Benign	0.0910236950012286	CAG	ACA
389	Q3T	Benign	0.0910236950012286	CAG	ACG
390	Q3Y	Benign	0.2901393067014767	CAA	UAU
391	Q3Y	Benign	0.2901393067014767	CAA	UAC
392	Q3Y	Benign	0.2901393067014767	CAG	UAU
393	Q3Y	Benign	0.2901393067014767	CAG	UAC
394	Q3N	Benign	0.07862396005490804	CAA	ACU
395	Q3N	Benign	0.07862396005490804	CAA	ACC
396	Q3N	Benign	0.07862396005490804	CAG	ACU
397	Q3N	Benign	0.07862396005490804	CAG	ACC
398	Q3D	Benign	0.09018838860805184	CAA	GAU
399	Q3D	Benign	0.09018838860805184	CAA	GAC
400	Q3D	Benign	0.09018838860805184	CAG	GAU
401	Q3D	Benign	0.09018838860805184	CAG	GAC
402	Q3E	Benign	0.06738252519450222	CAA	GAA
403	Q3E	Benign	0.06738252519450222	CAA	GCG
404	Q3E	Benign	0.06738252519450222	CAG	GAA
405	Q3E	Benign	0.06738252519450222	CAG	GCG
406	K4A	Benign	0.2869075855560001	ACA	GCU
407	K4A	Benign	0.2869075855560001	ACA	GCC
408	K4A	Benign	0.2869075855560001	ACA	GCA
409	K4A	Benign	0.2869075855560001	ACA	GAG
410	K4A	Benign	0.2869075855560001	ACG	GCU
411	K4A	Benign	0.2869075855560001	ACG	GCC
412	K4A	Benign	0.2869075855560001	ACG	GCA
413	K4A	Benign	0.2869075855560001	ACG	GAG
414	K4G	Benign	0.1244496197189144	ACA	GGU
415	K4G	Benign	0.1244496197189144	ACA	GGC
416	K4G	Benign	0.1244496197189144	ACA	GGA
417	K4G	Benign	0.1244496197189144	ACA	GGG
418	K4G	Benign	0.1244496197189144	ACG	GGU
419	K4G	Benign	0.1244496197189144	ACG	GGC
420	K4G	Benign	0.1244496197189144	ACG	GGA
421	K4G	Benign	0.1244496197189144	ACG	GGG
422	K4V	Benign	0.2716319293822126	ACA	GUU
423	K4V	Benign	0.2716319293822126	ACA	GUC
424	K4V	Benign	0.2716319293822126	ACA	GUA
425	K4V	Benign	0.2716319293822126	ACA	GUG
426	K4V	Benign	0.2716319293822126	ACG	GUU
427	K4V	Benign	0.2716319293822126	ACG	GUC
428	K4V	Benign	0.2716319293822126	ACG	GUA
429	K4V	Benign	0.2716319293822126	ACG	GUG
430	K4C	Benign	0.1390128339146843	ACA	UGU
431	K4C	Benign	0.1390128339146843	ACA	UGC
432	K4C	Benign	0.1390128339146843	ACG	UGU
433	K4C	Benign	0.1390128339146843	ACG	UGC
434	K4P	Benign	0.3896913749258637	ACA	CCU
435	K4P	Benign	0.3896913749258637	ACA	CCC
436	K4P	Benign	0.3896913749258637	ACA	CCA
437	K4P	Benign	0.3896913749258637	ACA	CCG
438	K4P	Benign	0.3896913749258637	ACG	CCU
439	K4P	Benign	0.3896913749258637	ACG	CCC
440	K4P	Benign	0.3896913749258637	ACG	CCA
441	K4P	Benign	0.3896913749258637	ACG	CCG
442	K4L	Benign	0.2657063758873647	ACA	UUA
443	K4L	Benign	0.2657063758873647	ACA	UUG
444	K4L	Benign	0.2657063758873647	ACA	CUU
445	K4L	Benign	0.2657063758873647	ACA	CUC
446	K4L	Benign	0.2657063758873647	ACA	CUA
447	K4L	Benign	0.2657063758873647	ACA	CUG
448	K4L	Benign	0.2657063758873647	ACG	UUA
449	K4L	Benign	0.2657063758873647	ACG	UUG
450	K4L	Benign	0.2657063758873647	ACG	CUU
451	K4L	Benign	0.2657063758873647	ACG	CUC
452	K4L	Benign	0.2657063758873647	ACG	CUA
453	K4L	Benign	0.2657063758873647	ACG	CUG
454	K4I	Benign	0.2657819029453002	ACA	AUU
455	K4I	Benign	0.2657819029453002	ACA	AUC
456	K4I	Benign	0.2657819029453002	ACA	AUA
457	K4I	Benign	0.2657819029453002	ACG	AUU
458	K4I	Benign	0.2657819029453002	ACG	AUC
459	K4I	Benign	0.2657819029453002	ACG	AUA
460	K4M	Benign	0.264242668233785	ACA	AUG
461	K4M	Benign	0.264242668233785	ACG	AUG
462	K4W	Benign	0.2889139640957927	ACA	UGG
463	K4W	Benign	0.2889139640957927	ACG	UGG
464	K4F	Benign	0.2696946888198603	ACA	UUU
465	K4F	Benign	0.2696946888198603	ACA	UUC
466	K4F	Benign	0.2696946888198603	ACG	UUU
467	K4F	Benign	0.2696946888198603	ACG	UUC
468	K4R	Benign	0.071054939856117	ACA	CGU
469	K4R	Benign	0.071054939856117	ACA	CGC
470	K4R	Benign	0.071054939856117	ACA	CGA
471	K4R	Benign	0.071054939856117	ACA	CGG
472	K4R	Benign	0.071054939856117	ACA	AGA
473	K4R	Benign	0.071054939856117	ACA	AGG
474	K4R	Benign	0.071054939856117	ACG	CGU
475	K4R	Benign	0.071054939856117	ACG	CGC
476	K4R	Benign	0.071054939856117	ACG	CGA
477	K4R	Benign	0.071054939856117	ACG	CGG
478	K4R	Benign	0.071054939856117	ACG	AGA
479	K4R	Benign	0.071054939856117	ACG	AGG
480	K4H	Benign	0.06816928938773423	ACA	CAU
481	K4H	Benign	0.06816928938773423	ACA	CAC
482	K4H	Benign	0.06816928938773423	ACG	CAU
483	K4H	Benign	0.06816928938773423	ACG	CAC
484	K4S	Benign	0.1353653466334942	ACA	UCU
485	K4S	Benign	0.1353653466334942	ACA	UCC
486	K4S	Benign	0.1353653466334942	ACA	UCA
487	K4S	Benign	0.1353653466334942	ACA	UCG
488	K4S	Benign	0.1353653466334942	ACA	AGU
489	K4S	Benign	0.1353653466334942	ACA	AGC
490	K4S	Benign	0.1353653466334942	ACG	UCU
491	K4S	Benign	0.1353653466334942	ACG	UCC
492	K4S	Benign	0.1353653466334942	ACG	UCA
493	K4S	Benign	0.1353653466334942	ACG	UCG
494	K4S	Benign	0.1353653466334942	ACG	AGU
495	K4S	Benign	0.1353653466334942	ACG	AGC
496	K4T	Benign	0.1336641106718783	ACA	ACU
497	K4T	Benign	0.1336641106718783	ACA	ACC
498	K4T	Benign	0.1336641106718783	ACA	ACA
499	K4T	Benign	0.1336641106718783	ACA	ACG
500	K4T	Benign	0.1336641106718783	ACG	ACU
501	K4T	Benign	0.1336641106718783	ACG	ACC
502	K4T	Benign	0.1336641106718783	ACG	ACA
503	K4T	Benign	0.1336641106718783	ACG	ACG
504	K4Y	Benign	0.3020293920382252	ACA	UAU
505	K4Y	Benign	0.3020293920382252	ACA	UAC
506	K4Y	Benign	0.3020293920382252	ACG	UAU
507	K4Y	Benign	0.3020293920382252	ACG	UAC
508	K4N	Benign	0.1204728642109606	ACA	ACU
509	K4N	Benign	0.1204728642109606	ACA	ACC
510	K4N	Benign	0.1204728642109606	ACG	ACU
511	K4N	Benign	0.1204728642109606	ACG	ACC
512	K4Q	Benign	0.136258974208967	ACA	CAA
513	K4Q	Benign	0.136258974208967	ACA	CAG
514	K4Q	Benign	0.136258974208967	ACG	CAA
515	K4Q	Benign	0.136258974208967	ACG	CAG
516	K4D	Benign	0.1316460128939702	ACA	GAU
517	K4D	Benign	0.1316460128939702	ACA	GAC
518	K4D	Benign	0.1316460128939702	ACG	GAU
519	K4D	Benign	0.1316460128939702	ACG	GAC
520	K4E	Benign	0.099180562386888	ACA	GAA
521	K4E	Benign	0.099180562386888	ACA	GCG
522	K4E	Benign	0.099180562386888	ACG	GAA
523	K4E	Benign	0.099180562386888	ACG	GCG
524	S5A	Benign	0.3646220345395788	UCU	GCU
525	S5A	Benign	0.3646220345395788	UCU	GCC
526	S5A	Benign	0.3646220345395788	UCU	GCA
527	S5A	Benign	0.3646220345395788	UCU	GAG
528	S5A	Benign	0.3646220345395788	UCC	GCU
529	S5A	Benign	0.3646220345395788	UCC	GCC
530	S5A	Benign	0.3646220345395788	UCC	GCA
531	S5A	Benign	0.3646220345395788	UCC	GAG
532	S5A	Benign	0.3646220345395788	UCA	GCU
533	S5A	Benign	0.3646220345395788	UCA	GCC
534	S5A	Benign	0.3646220345395788	UCA	GCA
535	S5A	Benign	0.3646220345395788	UCA	GAG
536	S5A	Benign	0.3646220345395788	UCG	GCU
537	S5A	Benign	0.3646220345395788	UCG	GCC
538	S5A	Benign	0.3646220345395788	UCG	GCA
539	S5A	Benign	0.3646220345395788	UCG	GAG
540	S5A	Benign	0.3646220345395788	AGU	GCU
541	S5A	Benign	0.3646220345395788	AGU	GCC
542	S5A	Benign	0.3646220345395788	AGU	GCA
543	S5A	Benign	0.3646220345395788	AGU	GAG
544	S5A	Benign	0.3646220345395788	AGC	GCU
545	S5A	Benign	0.3646220345395788	AGC	GCC
546	S5A	Benign	0.3646220345395788	AGC	GCA
547	S5A	Benign	0.3646220345395788	AGC	GAG
548	S5G	Benign	0.122357025547422	UCU	GGU
549	S5G	Benign	0.122357025547422	UCU	GGC
550	S5G	Benign	0.122357025547422	UCU	GGA
551	S5G	Benign	0.122357025547422	UCU	GGG
552	S5G	Benign	0.122357025547422	UCC	GGU
553	S5G	Benign	0.122357025547422	UCC	GGC
554	S5G	Benign	0.122357025547422	UCC	GGA
555	S5G	Benign	0.122357025547422	UCC	GGG
556	S5G	Benign	0.122357025547422	UCA	GGU
557	S5G	Benign	0.122357025547422	UCA	GGC
558	S5G	Benign	0.122357025547422	UCA	GGA
559	S5G	Benign	0.122357025547422	UCA	GGG
560	S5G	Benign	0.122357025547422	UCG	GGU
561	S5G	Benign	0.122357025547422	UCG	GGC
562	S5G	Benign	0.122357025547422	UCG	GGA
563	S5G	Benign	0.122357025547422	UCG	GGG
564	S5G	Benign	0.122357025547422	AGU	GGU
565	S5G	Benign	0.122357025547422	AGU	GGC
566	S5G	Benign	0.122357025547422	AGU	GGA
567	S5G	Benign	0.122357025547422	AGU	GGG
568	S5G	Benign	0.122357025547422	AGC	GGU
569	S5G	Benign	0.122357025547422	AGC	GGC
570	S5G	Benign	0.122357025547422	AGC	GGA
571	S5G	Benign	0.122357025547422	AGC	GGG
572	S5V	Benign	0.3484884485461521	UCU	GUU
573	S5V	Benign	0.3484884485461521	UCU	GUC
574	S5V	Benign	0.3484884485461521	UCU	GUA
575	S5V	Benign	0.3484884485461521	UCU	GUG
576	S5V	Benign	0.3484884485461521	UCC	GUU
577	S5V	Benign	0.3484884485461521	UCC	GUC
578	S5V	Benign	0.3484884485461521	UCC	GUA
579	S5V	Benign	0.3484884485461521	UCC	GUG
580	S5V	Benign	0.3484884485461521	UCA	GUU
581	S5V	Benign	0.3484884485461521	UCA	GUC
582	S5V	Benign	0.3484884485461521	UCA	GUA
583	S5V	Benign	0.3484884485461521	UCA	GUG
584	S5V	Benign	0.3484884485461521	UCG	GUU
585	S5V	Benign	0.3484884485461521	UCG	GUC
586	S5V	Benign	0.3484884485461521	UCG	GUA
587	S5V	Benign	0.3484884485461521	UCG	GUG
588	S5V	Benign	0.3484884485461521	AGU	GUU
589	S5V	Benign	0.3484884485461521	AGU	GUC
590	S5V	Benign	0.3484884485461521	AGU	GUA
591	S5V	Benign	0.3484884485461521	AGU	GUG
592	S5V	Benign	0.3484884485461521	AGC	GUU
593	S5V	Benign	0.3484884485461521	AGC	GUC
594	S5V	Benign	0.3484884485461521	AGC	GUA
595	S5V	Benign	0.3484884485461521	AGC	GUG
596	S5C	Benign	0.1282511032160292	UCU	UGU
597	S5C	Benign	0.1282511032160292	UCU	UGC
598	S5C	Benign	0.1282511032160292	UCC	UGU
599	S5C	Benign	0.1282511032160292	UCC	UGC
600	S5C	Benign	0.1282511032160292	UCA	UGU
601	S5C	Benign	0.1282511032160292	UCA	UGC
602	S5C	Benign	0.1282511032160292	UCG	UGU
603	S5C	Benign	0.1282511032160292	UCG	UGC
604	S5C	Benign	0.1282511032160292	AGU	UGU
605	S5C	Benign	0.1282511032160292	AGU	UGC
606	S5C	Benign	0.1282511032160292	AGC	UGU
607	S5C	Benign	0.1282511032160292	AGC	UGC
608	S5P	Benign	0.4537644445204687	UCU	CCU
609	S5P	Benign	0.4537644445204687	UCU	CCC
610	S5P	Benign	0.4537644445204687	UCU	CCA
611	S5P	Benign	0.4537644445204687	UCU	CCG
612	S5P	Benign	0.4537644445204687	UCC	CCU
613	S5P	Benign	0.4537644445204687	UCC	CCC
614	S5P	Benign	0.4537644445204687	UCC	CCA
615	S5P	Benign	0.4537644445204687	UCC	CCG
616	S5P	Benign	0.4537644445204687	UCA	CCU
617	S5P	Benign	0.4537644445204687	UCA	CCC
618	S5P	Benign	0.4537644445204687	UCA	CCA
619	S5P	Benign	0.4537644445204687	UCA	CCG
620	S5P	Benign	0.4537644445204687	UCG	CCU
621	S5P	Benign	0.4537644445204687	UCG	CCC
622	S5P	Benign	0.4537644445204687	UCG	CCA
623	S5P	Benign	0.4537644445204687	UCG	CCG
624	S5P	Benign	0.4537644445204687	AGU	CCU
625	S5P	Benign	0.4537644445204687	AGU	CCC
626	S5P	Benign	0.4537644445204687	AGU	CCA
627	S5P	Benign	0.4537644445204687	AGU	CCG
628	S5P	Benign	0.4537644445204687	AGC	CCU
629	S5P	Benign	0.4537644445204687	AGC	CCC
630	S5P	Benign	0.4537644445204687	AGC	CCA
631	S5P	Benign	0.4537644445204687	AGC	CCG
632	S5L	Benign	0.3425610026179623	UCU	UUA
633	S5L	Benign	0.3425610026179623	UCU	UUG
634	S5L	Benign	0.3425610026179623	UCU	CUU
635	S5L	Benign	0.3425610026179623	UCU	CUC
636	S5L	Benign	0.3425610026179623	UCU	CUA
637	S5L	Benign	0.3425610026179623	UCU	CUG
638	S5L	Benign	0.3425610026179623	UCC	UUA
639	S5L	Benign	0.3425610026179623	UCC	UUG
640	S5L	Benign	0.3425610026179623	UCC	CUU
641	S5L	Benign	0.3425610026179623	UCC	CUC
642	S5L	Benign	0.3425610026179623	UCC	CUA
643	S5L	Benign	0.3425610026179623	UCC	CUG
644	S5L	Benign	0.3425610026179623	UCA	UUA
645	S5L	Benign	0.3425610026179623	UCA	UUG
646	S5L	Benign	0.3425610026179623	UCA	CUU
647	S5L	Benign	0.3425610026179623	UCA	CUC
648	S5L	Benign	0.3425610026179623	UCA	CUA
649	S5L	Benign	0.3425610026179623	UCA	CUG
650	S5L	Benign	0.3425610026179623	UCG	UUA
651	S5L	Benign	0.3425610026179623	UCG	UUG
652	S5L	Benign	0.3425610026179623	UCG	CUU
653	S5L	Benign	0.3425610026179623	UCG	CUC
654	S5L	Benign	0.3425610026179623	UCG	CUA
655	S5L	Benign	0.3425610026179623	UCG	CUG
656	S5L	Benign	0.3425610026179623	AGU	UUA
657	S5L	Benign	0.3425610026179623	AGU	UUG
658	S5L	Benign	0.3425610026179623	AGU	CUU
659	S5L	Benign	0.3425610026179623	AGU	CUC
660	S5L	Benign	0.3425610026179623	AGU	CUA
661	S5L	Benign	0.3425610026179623	AGU	CUG
662	S5L	Benign	0.3425610026179623	AGC	UUA
663	S5L	Benign	0.3425610026179623	AGC	UUG
664	S5L	Benign	0.3425610026179623	AGC	CUU
665	S5L	Benign	0.3425610026179623	AGC	CUC
666	S5L	Benign	0.3425610026179623	AGC	CUA
667	S5L	Benign	0.3425610026179623	AGC	CUG
668	S5I	Benign	0.3419127422014503	UCU	AUU
669	S5I	Benign	0.3419127422014503	UCU	AUC
670	S5I	Benign	0.3419127422014503	UCU	AUA
671	S5I	Benign	0.3419127422014503	UCC	AUU
672	S5I	Benign	0.3419127422014503	UCC	AUC
673	S5I	Benign	0.3419127422014503	UCC	AUA
674	S5I	Benign	0.3419127422014503	UCA	AUU
675	S5I	Benign	0.3419127422014503	UCA	AUC
676	S5I	Benign	0.3419127422014503	UCA	AUA
677	S5I	Benign	0.3419127422014503	UCG	AUU
678	S5I	Benign	0.3419127422014503	UCG	AUC
679	S5I	Benign	0.3419127422014503	UCG	AUA
680	S5I	Benign	0.3419127422014503	AGU	AUU
681	S5I	Benign	0.3419127422014503	AGU	AUC
682	S5I	Benign	0.3419127422014503	AGU	AUA
683	S5I	Benign	0.3419127422014503	AGC	AUU
684	S5I	Benign	0.3419127422014503	AGC	AUC
685	S5I	Benign	0.3419127422014503	AGC	AUA
686	S5M	Benign	0.342038352219483	UCU	AUG
687	S5M	Benign	0.342038352219483	UCC	AUG
688	S5M	Benign	0.342038352219483	UCA	AUG
689	S5M	Benign	0.342038352219483	UCG	AUG
690	S5M	Benign	0.342038352219483	AGU	AUG
691	S5M	Benign	0.342038352219483	AGC	AUG
692	S5W	Benign	0.3512783226295451	UCU	UGG
693	S5W	Benign	0.3512783226295451	UCC	UGG
694	S5W	Benign	0.3512783226295451	UCA	UGG
695	S5W	Benign	0.3512783226295451	UCG	UGG
696	S5W	Benign	0.3512783226295451	AGU	UGG
697	S5W	Benign	0.3512783226295451	AGC	UGG
698	S5F	Benign	0.3351485057116468	UCU	UUU
699	S5F	Benign	0.3351485057116468	UCU	UUC
700	S5F	Benign	0.3351485057116468	UCC	UUU
701	S5F	Benign	0.3351485057116468	UCC	UUC
702	S5F	Benign	0.3351485057116468	UCA	UUU
703	S5F	Benign	0.3351485057116468	UCA	UUC
704	S5F	Benign	0.3351485057116468	UCG	UUU
705	S5F	Benign	0.3351485057116468	UCG	UUC
706	S5F	Benign	0.3351485057116468	AGU	UUU
707	S5F	Benign	0.3351485057116468	AGU	UUC
708	S5F	Benign	0.3351485057116468	AGC	UUU
709	S5F	Benign	0.3351485057116468	AGC	UUC
710	S5K	Benign	0.1694631867610421	UCU	ACA
711	S5K	Benign	0.1694631867610421	UCU	ACG
712	S5K	Benign	0.1694631867610421	UCC	ACA
713	S5K	Benign	0.1694631867610421	UCC	ACG
714	S5K	Benign	0.1694631867610421	UCA	ACA
715	S5K	Benign	0.1694631867610421	UCA	ACG
716	S5K	Benign	0.1694631867610421	UCG	ACA
717	S5K	Benign	0.1694631867610421	UCG	ACG
718	S5K	Benign	0.1694631867610421	AGU	ACA
719	S5K	Benign	0.1694631867610421	AGU	ACG
720	S5K	Benign	0.1694631867610421	AGC	ACA
721	S5K	Benign	0.1694631867610421	AGC	ACG
722	S5R	Benign	0.186387649609269	UCU	CGU
723	S5R	Benign	0.186387649609269	UCU	CGC
724	S5R	Benign	0.186387649609269	UCU	CGA
725	S5R	Benign	0.186387649609269	UCU	CGG
726	S5R	Benign	0.186387649609269	UCU	AGA
727	S5R	Benign	0.186387649609269	UCU	AGG
728	S5R	Benign	0.186387649609269	UCC	CGU
729	S5R	Benign	0.186387649609269	UCC	CGC
730	S5R	Benign	0.186387649609269	UCC	CGA
731	S5R	Benign	0.186387649609269	UCC	CGG
732	S5R	Benign	0.186387649609269	UCC	AGA
733	S5R	Benign	0.186387649609269	UCC	AGG
734	S5R	Benign	0.186387649609269	UCA	CGU
735	S5R	Benign	0.186387649609269	UCA	CGC
736	S5R	Benign	0.186387649609269	UCA	CGA
737	S5R	Benign	0.186387649609269	UCA	CGG
738	S5R	Benign	0.186387649609269	UCA	AGA
739	S5R	Benign	0.186387649609269	UCA	AGG
740	S5R	Benign	0.186387649609269	UCG	CGU
741	S5R	Benign	0.186387649609269	UCG	CGC
742	S5R	Benign	0.186387649609269	UCG	CGA
743	S5R	Benign	0.186387649609269	UCG	CGG
744	S5R	Benign	0.186387649609269	UCG	AGA
745	S5R	Benign	0.186387649609269	UCG	AGG
746	S5R	Benign	0.186387649609269	AGU	CGU
747	S5R	Benign	0.186387649609269	AGU	CGC
748	S5R	Benign	0.186387649609269	AGU	CGA
749	S5R	Benign	0.186387649609269	AGU	CGG
750	S5R	Benign	0.186387649609269	AGU	AGA
751	S5R	Benign	0.186387649609269	AGU	AGG
752	S5R	Benign	0.186387649609269	AGC	CGU
753	S5R	Benign	0.186387649609269	AGC	CGC
754	S5R	Benign	0.186387649609269	AGC	CGA
755	S5R	Benign	0.186387649609269	AGC	CGG
756	S5R	Benign	0.186387649609269	AGC	AGA
757	S5R	Benign	0.186387649609269	AGC	AGG
758	S5H	Benign	0.1455971289245253	UCU	CAU
759	S5H	Benign	0.1455971289245253	UCU	CAC
760	S5H	Benign	0.1455971289245253	UCC	CAU
761	S5H	Benign	0.1455971289245253	UCC	CAC
762	S5H	Benign	0.1455971289245253	UCA	CAU
763	S5H	Benign	0.1455971289245253	UCA	CAC
764	S5H	Benign	0.1455971289245253	UCG	CAU
765	S5H	Benign	0.1455971289245253	UCG	CAC
766	S5H	Benign	0.1455971289245253	AGU	CAU
767	S5H	Benign	0.1455971289245253	AGU	CAC
768	S5H	Benign	0.1455971289245253	AGC	CAU
769	S5H	Benign	0.1455971289245253	AGC	CAC
770	S5T	Benign	0.1379739647932066	UCU	ACU
771	S5T	Benign	0.1379739647932066	UCU	ACC
772	S5T	Benign	0.1379739647932066	UCU	ACA
773	S5T	Benign	0.1379739647932066	UCU	ACG
774	S5T	Benign	0.1379739647932066	UCC	ACU
775	S5T	Benign	0.1379739647932066	UCC	ACC
776	S5T	Benign	0.1379739647932066	UCC	ACA
777	S5T	Benign	0.1379739647932066	UCC	ACG
778	S5T	Benign	0.1379739647932066	UCA	ACU
779	S5T	Benign	0.1379739647932066	UCA	ACC
780	S5T	Benign	0.1379739647932066	UCA	ACA
781	S5T	Benign	0.1379739647932066	UCA	ACG
782	S5T	Benign	0.1379739647932066	UCG	ACU
783	S5T	Benign	0.1379739647932066	UCG	ACC
784	S5T	Benign	0.1379739647932066	UCG	ACA
785	S5T	Benign	0.1379739647932066	UCG	ACG
786	S5T	Benign	0.1379739647932066	AGU	ACU
787	S5T	Benign	0.1379739647932066	AGU	ACC
788	S5T	Benign	0.1379739647932066	AGU	ACA
789	S5T	Benign	0.1379739647932066	AGU	ACG
790	S5T	Benign	0.1379739647932066	AGC	ACU
791	S5T	Benign	0.1379739647932066	AGC	ACC
792	S5T	Benign	0.1379739647932066	AGC	ACA
793	S5T	Benign	0.1379739647932066	AGC	ACG
794	S5Y	Benign	0.3634405364021464	UCU	UAU
795	S5Y	Benign	0.3634405364021464	UCU	UAC
796	S5Y	Benign	0.3634405364021464	UCC	UAU
797	S5Y	Benign	0.3634405364021464	UCC	UAC
798	S5Y	Benign	0.3634405364021464	UCA	UAU
799	S5Y	Benign	0.3634405364021464	UCA	UAC
800	S5Y	Benign	0.3634405364021464	UCG	UAU
801	S5Y	Benign	0.3634405364021464	UCG	UAC
802	S5Y	Benign	0.3634405364021464	AGU	UAU
803	S5Y	Benign	0.3634405364021464	AGU	UAC
804	S5Y	Benign	0.3634405364021464	AGC	UAU
805	S5Y	Benign	0.3634405364021464	AGC	UAC
806	S5N	Benign	0.1389984297786809	UCU	ACU
807	S5N	Benign	0.1389984297786809	UCU	ACC
808	S5N	Benign	0.1389984297786809	UCC	ACU
809	S5N	Benign	0.1389984297786809	UCC	ACC
810	S5N	Benign	0.1389984297786809	UCA	ACU
811	S5N	Benign	0.1389984297786809	UCA	ACC
812	S5N	Benign	0.1389984297786809	UCG	ACU
813	S5N	Benign	0.1389984297786809	UCG	ACC
814	S5N	Benign	0.1389984297786809	AGU	ACU
815	S5N	Benign	0.1389984297786809	AGU	ACC
816	S5N	Benign	0.1389984297786809	AGC	ACU
817	S5N	Benign	0.1389984297786809	AGC	ACC
818	S5Q	Benign	0.1556477566336509	UCU	CAA
819	S5Q	Benign	0.1556477566336509	UCU	CAG
820	S5Q	Benign	0.1556477566336509	UCC	CAA
821	S5Q	Benign	0.1556477566336509	UCC	CAG
822	S5Q	Benign	0.1556477566336509	UCA	CAA
823	S5Q	Benign	0.1556477566336509	UCA	CAG
824	S5Q	Benign	0.1556477566336509	UCG	CAA
825	S5Q	Benign	0.1556477566336509	UCG	CAG
826	S5Q	Benign	0.1556477566336509	AGU	CAA
827	S5Q	Benign	0.1556477566336509	AGU	CAG
828	S5Q	Benign	0.1556477566336509	AGC	CAA
829	S5Q	Benign	0.1556477566336509	AGC	CAG
830	S5D	Benign	0.1489394459611296	UCU	GAU
831	S5D	Benign	0.1489394459611296	UCU	GAC
832	S5D	Benign	0.1489394459611296	UCC	GAU
833	S5D	Benign	0.1489394459611296	UCC	GAC
834	S5D	Benign	0.1489394459611296	UCA	GAU
835	S5D	Benign	0.1489394459611296	UCA	GAC
836	S5D	Benign	0.1489394459611296	UCG	GAU
837	S5D	Benign	0.1489394459611296	UCG	GAC
838	S5D	Benign	0.1489394459611296	AGU	GAU
839	S5D	Benign	0.1489394459611296	AGU	GAC
840	S5D	Benign	0.1489394459611296	AGC	GAU
841	S5D	Benign	0.1489394459611296	AGC	GAC
842	S5E	Benign	0.1058858073894001	UCU	GAA
843	S5E	Benign	0.1058858073894001	UCU	GCG
844	S5E	Benign	0.1058858073894001	UCC	GAA
845	S5E	Benign	0.1058858073894001	UCC	GCG
846	S5E	Benign	0.1058858073894001	UCA	GAA
847	S5E	Benign	0.1058858073894001	UCA	GCG
848	S5E	Benign	0.1058858073894001	UCG	GAA
849	S5E	Benign	0.1058858073894001	UCG	GCG
850	S5E	Benign	0.1058858073894001	AGU	GAA
851	S5E	Benign	0.1058858073894001	AGU	GCG
852	S5E	Benign	0.1058858073894001	AGC	GAA
853	S5E	Benign	0.1058858073894001	AGC	GCG
854	R6A	Benign	0.2230752989625146	CGU	GCU
855	R6A	Benign	0.2230752989625146	CGU	GCC
856	R6A	Benign	0.2230752989625146	CGU	GCA
857	R6A	Benign	0.2230752989625146	CGU	GAG
858	R6A	Benign	0.2230752989625146	CGC	GCU
859	R6A	Benign	0.2230752989625146	CGC	GCC
860	R6A	Benign	0.2230752989625146	CGC	GCA
861	R6A	Benign	0.2230752989625146	CGC	GAG
862	R6A	Benign	0.2230752989625146	CGA	GCU
863	R6A	Benign	0.2230752989625146	CGA	GCC
864	R6A	Benign	0.2230752989625146	CGA	GCA
865	R6A	Benign	0.2230752989625146	CGA	GAG
866	R6A	Benign	0.2230752989625146	CGG	GCU
867	R6A	Benign	0.2230752989625146	CGG	GCC
868	R6A	Benign	0.2230752989625146	CGG	GCA
869	R6A	Benign	0.2230752989625146	CGG	GAG
870	R6A	Benign	0.2230752989625146	AGA	GCU
871	R6A	Benign	0.2230752989625146	AGA	GCC
872	R6A	Benign	0.2230752989625146	AGA	GCA
873	R6A	Benign	0.2230752989625146	AGA	GAG
874	R6A	Benign	0.2230752989625146	AGG	GCU
875	R6A	Benign	0.2230752989625146	AGG	GCC
876	R6A	Benign	0.2230752989625146	AGG	GCA
877	R6A	Benign	0.2230752989625146	AGG	GAG
878	R6G	Benign	0.07378347210378178	CGU	GGU
879	R6G	Benign	0.07378347210378178	CGU	GGC
880	R6G	Benign	0.07378347210378178	CGU	GGA
881	R6G	Benign	0.07378347210378178	CGU	GGG
882	R6G	Benign	0.07378347210378178	CGC	GGU
883	R6G	Benign	0.07378347210378178	CGC	GGC
884	R6G	Benign	0.07378347210378178	CGC	GGA
885	R6G	Benign	0.07378347210378178	CGC	GGG
886	R6G	Benign	0.07378347210378178	CGA	GGU
887	R6G	Benign	0.07378347210378178	CGA	GGC
888	R6G	Benign	0.07378347210378178	CGA	GGA
889	R6G	Benign	0.07378347210378178	CGA	GGG
890	R6G	Benign	0.07378347210378178	CGG	GGU
891	R6G	Benign	0.07378347210378178	CGG	GGC
892	R6G	Benign	0.07378347210378178	CGG	GGA
893	R6G	Benign	0.07378347210378178	CGG	GGG
894	R6G	Benign	0.07378347210378178	AGA	GGU
895	R6G	Benign	0.07378347210378178	AGA	GGC
896	R6G	Benign	0.07378347210378178	AGA	GGA
897	R6G	Benign	0.07378347210378178	AGA	GGG
898	R6G	Benign	0.07378347210378178	AGG	GGU
899	R6G	Benign	0.07378347210378178	AGG	GGC
900	R6G	Benign	0.07378347210378178	AGG	GGA
901	R6G	Benign	0.07378347210378178	AGG	GGG
902	R6V	Benign	0.2098787796691361	CGU	GUU
903	R6V	Benign	0.2098787796691361	CGU	GUC
904	R6V	Benign	0.2098787796691361	CGU	GUA
905	R6V	Benign	0.2098787796691361	CGU	GUG
906	R6V	Benign	0.2098787796691361	CGC	GUU
907	R6V	Benign	0.2098787796691361	CGC	GUC
908	R6V	Benign	0.2098787796691361	CGC	GUA
909	R6V	Benign	0.2098787796691361	CGC	GUG
910	R6V	Benign	0.2098787796691361	CGA	GUU
911	R6V	Benign	0.2098787796691361	CGA	GUC
912	R6V	Benign	0.2098787796691361	CGA	GUA
913	R6V	Benign	0.2098787796691361	CGA	GUG
914	R6V	Benign	0.2098787796691361	CGG	GUU
915	R6V	Benign	0.2098787796691361	CGG	GUC
916	R6V	Benign	0.2098787796691361	CGG	GUA
917	R6V	Benign	0.2098787796691361	CGG	GUG
918	R6V	Benign	0.2098787796691361	AGA	GUU
919	R6V	Benign	0.2098787796691361	AGA	GUC
920	R6V	Benign	0.2098787796691361	AGA	GUA
921	R6V	Benign	0.2098787796691361	AGA	GUG
922	R6V	Benign	0.2098787796691361	AGG	GUU
923	R6V	Benign	0.2098787796691361	AGG	GUC
924	R6V	Benign	0.2098787796691361	AGG	GUA
925	R6V	Benign	0.2098787796691361	AGG	GUG
926	R6C	Benign	0.08755498509623952	CGU	UGU
927	R6C	Benign	0.08755498509623952	CGU	UGC
928	R6C	Benign	0.08755498509623952	CGC	UGU
929	R6C	Benign	0.08755498509623952	CGC	UGC
930	R6C	Benign	0.08755498509623952	CGA	UGU
931	R6C	Benign	0.08755498509623952	CGA	UGC
932	R6C	Benign	0.08755498509623952	CGG	UGU
933	R6C	Benign	0.08755498509623952	CGG	UGC
934	R6C	Benign	0.08755498509623952	AGA	UGU
935	R6C	Benign	0.08755498509623952	AGA	UGC
936	R6C	Benign	0.08755498509623952	AGG	UGU
937	R6C	Benign	0.08755498509623952	AGG	UGC
938	R6P	Benign	0.3628600330799583	CGU	CCU
939	R6P	Benign	0.3628600330799583	CGU	CCC
940	R6P	Benign	0.3628600330799583	CGU	CCA
941	R6P	Benign	0.3628600330799583	CGU	CCG
942	R6P	Benign	0.3628600330799583	CGC	CCU
943	R6P	Benign	0.3628600330799583	CGC	CCC
944	R6P	Benign	0.3628600330799583	CGC	CCA
945	R6P	Benign	0.3628600330799583	CGC	CCG
946	R6P	Benign	0.3628600330799583	CGA	CCU
947	R6P	Benign	0.3628600330799583	CGA	CCC
948	R6P	Benign	0.3628600330799583	CGA	CCA
949	R6P	Benign	0.3628600330799583	CGA	CCG
950	R6P	Benign	0.3628600330799583	CGG	CCU
951	R6P	Benign	0.3628600330799583	CGG	CCC
952	R6P	Benign	0.3628600330799583	CGG	CCA
953	R6P	Benign	0.3628600330799583	CGG	CCG
954	R6P	Benign	0.3628600330799583	AGA	CCU
955	R6P	Benign	0.3628600330799583	AGA	CCC
956	R6P	Benign	0.3628600330799583	AGA	CCA
957	R6P	Benign	0.3628600330799583	AGA	CCG
958	R6P	Benign	0.3628600330799583	AGG	CCU
959	R6P	Benign	0.3628600330799583	AGG	CCC
960	R6P	Benign	0.3628600330799583	AGG	CCA
961	R6P	Benign	0.3628600330799583	AGG	CCG
962	R6L	Benign	0.2041324599090237	CGU	UUA
963	R6L	Benign	0.2041324599090237	CGU	UUG
964	R6L	Benign	0.2041324599090237	CGU	CUU
965	R6L	Benign	0.2041324599090237	CGU	CUC
966	R6L	Benign	0.2041324599090237	CGU	CUA
967	R6L	Benign	0.2041324599090237	CGU	CUG
968	R6L	Benign	0.2041324599090237	CGC	UUA
969	R6L	Benign	0.2041324599090237	CGC	UUG
970	R6L	Benign	0.2041324599090237	CGC	CUU
971	R6L	Benign	0.2041324599090237	CGC	CUC
972	R6L	Benign	0.2041324599090237	CGC	CUA
973	R6L	Benign	0.2041324599090237	CGC	CUG
974	R6L	Benign	0.2041324599090237	CGA	UUA
975	R6L	Benign	0.2041324599090237	CGA	UUG
976	R6L	Benign	0.2041324599090237	CGA	CUU
977	R6L	Benign	0.2041324599090237	CGA	CUC
978	R6L	Benign	0.2041324599090237	CGA	CUA
979	R6L	Benign	0.2041324599090237	CGA	CUG
980	R6L	Benign	0.2041324599090237	CGG	UUA
981	R6L	Benign	0.2041324599090237	CGG	UUG
982	R6L	Benign	0.2041324599090237	CGG	CUU
983	R6L	Benign	0.2041324599090237	CGG	CUC
984	R6L	Benign	0.2041324599090237	CGG	CUA
985	R6L	Benign	0.2041324599090237	CGG	CUG
986	R6L	Benign	0.2041324599090237	AGA	UUA
987	R6L	Benign	0.2041324599090237	AGA	UUG
988	R6L	Benign	0.2041324599090237	AGA	CUU
989	R6L	Benign	0.2041324599090237	AGA	CUC
990	R6L	Benign	0.2041324599090237	AGA	CUA
991	R6L	Benign	0.2041324599090237	AGA	CUG
992	R6L	Benign	0.2041324599090237	AGG	UUA
993	R6L	Benign	0.2041324599090237	AGG	UUG
994	R6L	Benign	0.2041324599090237	AGG	CUU
995	R6L	Benign	0.2041324599090237	AGG	CUC
996	R6L	Benign	0.2041324599090237	AGG	CUA
997	R6L	Benign	0.2041324599090237	AGG	CUG
998	R6I	Benign	0.2049100802324131	CGU	AUU
999	R6I	Benign	0.2049100802324131	CGU	AUC
1000	R6I	Benign	0.2049100802324131	CGU	AUA
1001	R6I	Benign	0.2049100802324131	CGC	AUU
1002	R6I	Benign	0.2049100802324131	CGC	AUC
1003	R6I	Benign	0.2049100802324131	CGC	AUA
1004	R6I	Benign	0.2049100802324131	CGA	AUU
1005	R6I	Benign	0.2049100802324131	CGA	AUC
1006	R6I	Benign	0.2049100802324131	CGA	AUA
1007	R6I	Benign	0.2049100802324131	CGG	AUU
1008	R6I	Benign	0.2049100802324131	CGG	AUC
1009	R6I	Benign	0.2049100802324131	CGG	AUA
1010	R6I	Benign	0.2049100802324131	AGA	AUU
1011	R6I	Benign	0.2049100802324131	AGA	AUC
1012	R6I	Benign	0.2049100802324131	AGA	AUA
1013	R6I	Benign	0.2049100802324131	AGG	AUU
1014	R6I	Benign	0.2049100802324131	AGG	AUC
1015	R6I	Benign	0.2049100802324131	AGG	AUA
1016	R6M	Benign	0.2015185117430764	CGU	AUG
1017	R6M	Benign	0.2015185117430764	CGC	AUG
1018	R6M	Benign	0.2015185117430764	CGA	AUG
1019	R6M	Benign	0.2015185117430764	CGG	AUG
1020	R6M	Benign	0.2015185117430764	AGA	AUG
1021	R6M	Benign	0.2015185117430764	AGG	AUG
1022	R6W	Benign	0.2252034081502422	CGU	UGG
1023	R6W	Benign	0.2252034081502422	CGC	UGG
1024	R6W	Benign	0.2252034081502422	CGA	UGG
1025	R6W	Benign	0.2252034081502422	CGG	UGG
1026	R6W	Benign	0.2252034081502422	AGA	UGG
1027	R6W	Benign	0.2252034081502422	AGG	UGG
1028	R6F	Benign	0.2088883460934348	CGU	UUU
1029	R6F	Benign	0.2088883460934348	CGU	UUC
1030	R6F	Benign	0.2088883460934348	CGC	UUU
1031	R6F	Benign	0.2088883460934348	CGC	UUC
1032	R6F	Benign	0.2088883460934348	CGA	UUU
1033	R6F	Benign	0.2088883460934348	CGA	UUC
1034	R6F	Benign	0.2088883460934348	CGG	UUU
1035	R6F	Benign	0.2088883460934348	CGG	UUC
1036	R6F	Benign	0.2088883460934348	AGA	UUU
1037	R6F	Benign	0.2088883460934348	AGA	UUC
1038	R6F	Benign	0.2088883460934348	AGG	UUU
1039	R6F	Benign	0.2088883460934348	AGG	UUC
1040	R6K	Benign	0.0617881754348389	CGU	ACA
1041	R6K	Benign	0.0617881754348389	CGU	ACG
1042	R6K	Benign	0.0617881754348389	CGC	ACA
1043	R6K	Benign	0.0617881754348389	CGC	ACG
1044	R6K	Benign	0.0617881754348389	CGA	ACA
1045	R6K	Benign	0.0617881754348389	CGA	ACG
1046	R6K	Benign	0.0617881754348389	CGG	ACA
1047	R6K	Benign	0.0617881754348389	CGG	ACG
1048	R6K	Benign	0.0617881754348389	AGA	ACA
1049	R6K	Benign	0.0617881754348389	AGA	ACG
1050	R6K	Benign	0.0617881754348389	AGG	ACA
1051	R6K	Benign	0.0617881754348389	AGG	ACG
1052	R6H	Benign	0.06271456348089426	CGU	CAU
1053	R6H	Benign	0.06271456348089426	CGU	CAC
1054	R6H	Benign	0.06271456348089426	CGC	CAU
1055	R6H	Benign	0.06271456348089426	CGC	CAC
1056	R6H	Benign	0.06271456348089426	CGA	CAU
1057	R6H	Benign	0.06271456348089426	CGA	CAC
1058	R6H	Benign	0.06271456348089426	CGG	CAU
1059	R6H	Benign	0.06271456348089426	CGG	CAC
1060	R6H	Benign	0.06271456348089426	AGA	CAU
1061	R6H	Benign	0.06271456348089426	AGA	CAC
1062	R6H	Benign	0.06271456348089426	AGG	CAU
1063	R6H	Benign	0.06271456348089426	AGG	CAC
1064	R6S	Benign	0.08212624352238	CGU	UCU
1065	R6S	Benign	0.08212624352238	CGU	UCC
1066	R6S	Benign	0.08212624352238	CGU	UCA
1067	R6S	Benign	0.08212624352238	CGU	UCG
1068	R6S	Benign	0.08212624352238	CGU	AGU
1069	R6S	Benign	0.08212624352238	CGU	AGC
1070	R6S	Benign	0.08212624352238	CGC	UCU
1071	R6S	Benign	0.08212624352238	CGC	UCC
1072	R6S	Benign	0.08212624352238	CGC	UCA
1073	R6S	Benign	0.08212624352238	CGC	UCG
1074	R6S	Benign	0.08212624352238	CGC	AGU
1075	R6S	Benign	0.08212624352238	CGC	AGC
1076	R6S	Benign	0.08212624352238	CGA	UCU
1077	R6S	Benign	0.08212624352238	CGA	UCC
1078	R6S	Benign	0.08212624352238	CGA	UCA
1079	R6S	Benign	0.08212624352238	CGA	UCG
1080	R6S	Benign	0.08212624352238	CGA	AGU
1081	R6S	Benign	0.08212624352238	CGA	AGC
1082	R6S	Benign	0.08212624352238	CGG	UCU
1083	R6S	Benign	0.08212624352238	CGG	UCC
1084	R6S	Benign	0.08212624352238	CGG	UCA
1085	R6S	Benign	0.08212624352238	CGG	UCG
1086	R6S	Benign	0.08212624352238	CGG	AGU
1087	R6S	Benign	0.08212624352238	CGG	AGC
1088	R6S	Benign	0.08212624352238	AGA	UCU
1089	R6S	Benign	0.08212624352238	AGA	UCC
1090	R6S	Benign	0.08212624352238	AGA	UCA
1091	R6S	Benign	0.08212624352238	AGA	UCG
1092	R6S	Benign	0.08212624352238	AGA	AGU
1093	R6S	Benign	0.08212624352238	AGA	AGC
1094	R6S	Benign	0.08212624352238	AGG	UCU
1095	R6S	Benign	0.08212624352238	AGG	UCC
1096	R6S	Benign	0.08212624352238	AGG	UCA
1097	R6S	Benign	0.08212624352238	AGG	UCG
1098	R6S	Benign	0.08212624352238	AGG	AGU
1099	R6S	Benign	0.08212624352238	AGG	AGC
1100	R6T	Benign	0.08082367683493435	CGU	ACU
1101	R6T	Benign	0.08082367683493435	CGU	ACC
1102	R6T	Benign	0.08082367683493435	CGU	ACA
1103	R6T	Benign	0.08082367683493435	CGU	ACG
1104	R6T	Benign	0.08082367683493435	CGC	ACU
1105	R6T	Benign	0.08082367683493435	CGC	ACC
1106	R6T	Benign	0.08082367683493435	CGC	ACA
1107	R6T	Benign	0.08082367683493435	CGC	ACG
1108	R6T	Benign	0.08082367683493435	CGA	ACU
1109	R6T	Benign	0.08082367683493435	CGA	ACC
1110	R6T	Benign	0.08082367683493435	CGA	ACA
1111	R6T	Benign	0.08082367683493435	CGA	ACG
1112	R6T	Benign	0.08082367683493435	CGG	ACU
1113	R6T	Benign	0.08082367683493435	CGG	ACC
1114	R6T	Benign	0.08082367683493435	CGG	ACA
1115	R6T	Benign	0.08082367683493435	CGG	ACG
1116	R6T	Benign	0.08082367683493435	AGA	ACU
1117	R6T	Benign	0.08082367683493435	AGA	ACC
1118	R6T	Benign	0.08082367683493435	AGA	ACA
1119	R6T	Benign	0.08082367683493435	AGA	ACG
1120	R6T	Benign	0.08082367683493435	AGG	ACU
1121	R6T	Benign	0.08082367683493435	AGG	ACC
1122	R6T	Benign	0.08082367683493435	AGG	ACA
1123	R6T	Benign	0.08082367683493435	AGG	ACG
1124	R6Y	Benign	0.2378173326053811	CGU	UAU
1125	R6Y	Benign	0.2378173326053811	CGU	UAC
1126	R6Y	Benign	0.2378173326053811	CGC	UAU
1127	R6Y	Benign	0.2378173326053811	CGC	UAC
1128	R6Y	Benign	0.2378173326053811	CGA	UAU
1129	R6Y	Benign	0.2378173326053811	CGA	UAC
1130	R6Y	Benign	0.2378173326053811	CGG	UAU
1131	R6Y	Benign	0.2378173326053811	CGG	UAC
1132	R6Y	Benign	0.2378173326053811	AGA	UAU
1133	R6Y	Benign	0.2378173326053811	AGA	UAC
1134	R6Y	Benign	0.2378173326053811	AGG	UAU
1135	R6Y	Benign	0.2378173326053811	AGG	UAC
1136	R6N	Benign	0.06716273475359683	CGU	ACU
1137	R6N	Benign	0.06716273475359683	CGU	ACC
1138	R6N	Benign	0.06716273475359683	CGC	ACU
1139	R6N	Benign	0.06716273475359683	CGC	ACC
1140	R6N	Benign	0.06716273475359683	CGA	ACU
1141	R6N	Benign	0.06716273475359683	CGA	ACC
1142	R6N	Benign	0.06716273475359683	CGG	ACU
1143	R6N	Benign	0.06716273475359683	CGG	ACC
1144	R6N	Benign	0.06716273475359683	AGA	ACU
1145	R6N	Benign	0.06716273475359683	AGA	ACC
1146	R6N	Benign	0.06716273475359683	AGG	ACU
1147	R6N	Benign	0.06716273475359683	AGG	ACC
1148	R6Q	Benign	0.0828494164426056	CGU	CAA
1149	R6Q	Benign	0.0828494164426056	CGU	CAG
1150	R6Q	Benign	0.0828494164426056	CGC	CAA
1151	R6Q	Benign	0.0828494164426056	CGC	CAG
1152	R6Q	Benign	0.0828494164426056	CGA	CAA
1153	R6Q	Benign	0.0828494164426056	CGA	CAG
1154	R6Q	Benign	0.0828494164426056	CGG	CAA
1155	R6Q	Benign	0.0828494164426056	CGG	CAG
1156	R6Q	Benign	0.0828494164426056	AGA	CAA
1157	R6Q	Benign	0.0828494164426056	AGA	CAG
1158	R6Q	Benign	0.0828494164426056	AGG	CAA
1159	R6Q	Benign	0.0828494164426056	AGG	CAG
1160	R6D	Benign	0.07930162530647666	CGU	GAU
1161	R6D	Benign	0.07930162530647666	CGU	GAC
1162	R6D	Benign	0.07930162530647666	CGC	GAU
1163	R6D	Benign	0.07930162530647666	CGC	GAC
1164	R6D	Benign	0.07930162530647666	CGA	GAU
1165	R6D	Benign	0.07930162530647666	CGA	GAC
1166	R6D	Benign	0.07930162530647666	CGG	GAU
1167	R6D	Benign	0.07930162530647666	CGG	GAC
1168	R6D	Benign	0.07930162530647666	AGA	GAU
1169	R6D	Benign	0.07930162530647666	AGA	GAC
1170	R6D	Benign	0.07930162530647666	AGG	GAU
1171	R6D	Benign	0.07930162530647666	AGG	GAC
1172	R6E	Benign	0.08512309487271254	CGU	GAA
1173	R6E	Benign	0.08512309487271254	CGU	GCG
1174	R6E	Benign	0.08512309487271254	CGC	GAA
1175	R6E	Benign	0.08512309487271254	CGC	GCG
1176	R6E	Benign	0.08512309487271254	CGA	GAA
1177	R6E	Benign	0.08512309487271254	CGA	GCG
1178	R6E	Benign	0.08512309487271254	CGG	GAA
1179	R6E	Benign	0.08512309487271254	CGG	GCG
1180	R6E	Benign	0.08512309487271254	AGA	GAA
1181	R6E	Benign	0.08512309487271254	AGA	GCG
1182	R6E	Benign	0.08512309487271254	AGG	GAA
1183	R6E	Benign	0.08512309487271254	AGG	GCG
1184	N7A	Benign	0.1070725112208192	ACU	GCU
1185	N7A	Benign	0.1070725112208192	ACU	GCC
1186	N7A	Benign	0.1070725112208192	ACU	GCA
1187	N7A	Benign	0.1070725112208192	ACU	GAG
1188	N7A	Benign	0.1070725112208192	ACC	GCU
1189	N7A	Benign	0.1070725112208192	ACC	GCC
1190	N7A	Benign	0.1070725112208192	ACC	GCA
1191	N7A	Benign	0.1070725112208192	ACC	GAG
1192	N7G	Benign	0.0228857426595837	ACU	GGU
1193	N7G	Benign	0.0228857426595837	ACU	GGC
1194	N7G	Benign	0.0228857426595837	ACU	GGA
1195	N7G	Benign	0.0228857426595837	ACU	GGG
1196	N7G	Benign	0.0228857426595837	ACC	GGU
1197	N7G	Benign	0.0228857426595837	ACC	GGC
1198	N7G	Benign	0.0228857426595837	ACC	GGA
1199	N7G	Benign	0.0228857426595837	ACC	GGG
1200	N7V	Benign	0.1113315825917397	ACU	GUU
1201	N7V	Benign	0.1113315825917397	ACU	GUC
1202	N7V	Benign	0.1113315825917397	ACU	GUA
1203	N7V	Benign	0.1113315825917397	ACU	GUG
1204	N7V	Benign	0.1113315825917397	ACC	GUU
1205	N7V	Benign	0.1113315825917397	ACC	GUC
1206	N7V	Benign	0.1113315825917397	ACC	GUA
1207	N7V	Benign	0.1113315825917397	ACC	GUG
1208	N7C	Benign	0.02460809575547547	ACU	UGU
1209	N7C	Benign	0.02460809575547547	ACU	UGC
1210	N7C	Benign	0.02460809575547547	ACC	UGU
1211	N7C	Benign	0.02460809575547547	ACC	UGC
1212	N7P	Benign	0.2113319153108272	ACU	CCU
1213	N7P	Benign	0.2113319153108272	ACU	CCC
1214	N7P	Benign	0.2113319153108272	ACU	CCA
1215	N7P	Benign	0.2113319153108272	ACU	CCG
1216	N7P	Benign	0.2113319153108272	ACC	CCU
1217	N7P	Benign	0.2113319153108272	ACC	CCC
1218	N7P	Benign	0.2113319153108272	ACC	CCA
1219	N7P	Benign	0.2113319153108272	ACC	CCG
1220	N7L	Benign	0.1080983626373825	ACU	UUA
1221	N7L	Benign	0.1080983626373825	ACU	UUG
1222	N7L	Benign	0.1080983626373825	ACU	CUU
1223	N7L	Benign	0.1080983626373825	ACU	CUC
1224	N7L	Benign	0.1080983626373825	ACU	CUA
1225	N7L	Benign	0.1080983626373825	ACU	CUG
1226	N7L	Benign	0.1080983626373825	ACC	UUA
1227	N7L	Benign	0.1080983626373825	ACC	UUG
1228	N7L	Benign	0.1080983626373825	ACC	CUU
1229	N7L	Benign	0.1080983626373825	ACC	CUC
1230	N7L	Benign	0.1080983626373825	ACC	CUA
1231	N7L	Benign	0.1080983626373825	ACC	CUG
1232	N7I	Benign	0.1128043281492045	ACU	AUU
1233	N7I	Benign	0.1128043281492045	ACU	AUC
1234	N7I	Benign	0.1128043281492045	ACU	AUA
1235	N7I	Benign	0.1128043281492045	ACC	AUU
1236	N7I	Benign	0.1128043281492045	ACC	AUC
1237	N7I	Benign	0.1128043281492045	ACC	AUA
1238	N7M	Benign	0.1003570038392075	ACU	AUG
1239	N7M	Benign	0.1003570038392075	ACC	AUG
1240	N7W	Benign	0.1167211961784844	ACU	UGG
1241	N7W	Benign	0.1167211961784844	ACC	UGG
1242	N7F	Benign	0.1128809537581793	ACU	UUU
1243	N7F	Benign	0.1128809537581793	ACU	UUC
1244	N7F	Benign	0.1128809537581793	ACC	UUU
1245	N7F	Benign	0.1128809537581793	ACC	UUC
1246	N7K	Benign	0.02616237030418139	ACU	ACA
1247	N7K	Benign	0.02616237030418139	ACU	ACG
1248	N7K	Benign	0.02616237030418139	ACC	ACA
1249	N7K	Benign	0.02616237030418139	ACC	ACG
1250	N7R	Benign	0.02596498854825696	ACU	CGU
1251	N7R	Benign	0.02596498854825696	ACU	CGC
1252	N7R	Benign	0.02596498854825696	ACU	CGA
1253	N7R	Benign	0.02596498854825696	ACU	CGG
1254	N7R	Benign	0.02596498854825696	ACU	AGA
1255	N7R	Benign	0.02596498854825696	ACU	AGG
1256	N7R	Benign	0.02596498854825696	ACC	CGU
1257	N7R	Benign	0.02596498854825696	ACC	CGC
1258	N7R	Benign	0.02596498854825696	ACC	CGA
1259	N7R	Benign	0.02596498854825696	ACC	CGG
1260	N7R	Benign	0.02596498854825696	ACC	AGA
1261	N7R	Benign	0.02596498854825696	ACC	AGG
1262	N7H	Benign	0.02407800561262017	ACU	CAU
1263	N7H	Benign	0.02407800561262017	ACU	CAC
1264	N7H	Benign	0.02407800561262017	ACC	CAU
1265	N7H	Benign	0.02407800561262017	ACC	CAC
1266	N7S	Benign	0.02440296972113013	ACU	UCU
1267	N7S	Benign	0.02440296972113013	ACU	UCC
1268	N7S	Benign	0.02440296972113013	ACU	UCA
1269	N7S	Benign	0.02440296972113013	ACU	UCG
1270	N7S	Benign	0.02440296972113013	ACU	AGU
1271	N7S	Benign	0.02440296972113013	ACU	AGC
1272	N7S	Benign	0.02440296972113013	ACC	UCU
1273	N7S	Benign	0.02440296972113013	ACC	UCC
1274	N7S	Benign	0.02440296972113013	ACC	UCA
1275	N7S	Benign	0.02440296972113013	ACC	UCG
1276	N7S	Benign	0.02440296972113013	ACC	AGU
1277	N7S	Benign	0.02440296972113013	ACC	AGC
1278	N7T	Benign	0.02414082572573337	ACU	ACU
1279	N7T	Benign	0.02414082572573337	ACU	ACC
1280	N7T	Benign	0.02414082572573337	ACU	ACA
1281	N7T	Benign	0.02414082572573337	ACU	ACG
1282	N7T	Benign	0.02414082572573337	ACC	ACU
1283	N7T	Benign	0.02414082572573337	ACC	ACC
1284	N7T	Benign	0.02414082572573337	ACC	ACA
1285	N7T	Benign	0.02414082572573337	ACC	ACG
1286	N7Y	Benign	0.1214615595014396	ACU	UAU
1287	N7Y	Benign	0.1214615595014396	ACU	UAC
1288	N7Y	Benign	0.1214615595014396	ACC	UAU
1289	N7Y	Benign	0.1214615595014396	ACC	UAC
1290	N7Q	Benign	0.02515731707265907	ACU	CAA
1291	N7Q	Benign	0.02515731707265907	ACU	CAG
1292	N7Q	Benign	0.02515731707265907	ACC	CAA
1293	N7Q	Benign	0.02515731707265907	ACC	CAG
1294	N7D	Benign	0.02522841477618661	ACU	GAU
1295	N7D	Benign	0.02522841477618661	ACU	GAC
1296	N7D	Benign	0.02522841477618661	ACC	GAU
1297	N7D	Benign	0.02522841477618661	ACC	GAC
1298	N7E	Benign	0.03031189939674357	ACU	GAA
1299	N7E	Benign	0.03031189939674357	ACU	GCG
1300	N7E	Benign	0.03031189939674357	ACC	GAA
1301	N7E	Benign	0.03031189939674357	ACC	GCG
1302	G8A	Benign	0.04329064625063313	GGU	GCU
1303	G8A	Benign	0.04329064625063313	GGU	GCC
1304	G8A	Benign	0.04329064625063313	GGU	GCA
1305	G8A	Benign	0.04329064625063313	GGU	GAG
1306	G8A	Benign	0.04329064625063313	GGC	GCU
1307	G8A	Benign	0.04329064625063313	GGC	GCC
1308	G8A	Benign	0.04329064625063313	GGC	GCA
1309	G8A	Benign	0.04329064625063313	GGC	GAG
1310	G8A	Benign	0.04329064625063313	GGA	GCU
1311	G8A	Benign	0.04329064625063313	GGA	GCC
1312	G8A	Benign	0.04329064625063313	GGA	GCA
1313	G8A	Benign	0.04329064625063313	GGA	GAG
1314	G8A	Benign	0.04329064625063313	GGG	GCU
1315	G8A	Benign	0.04329064625063313	GGG	GCC
1316	G8A	Benign	0.04329064625063313	GGG	GCA
1317	G8A	Benign	0.04329064625063313	GGG	GAG
1318	G8V	Benign	0.04332525686245686	GGU	GUU
1319	G8V	Benign	0.04332525686245686	GGU	GUC
1320	G8V	Benign	0.04332525686245686	GGU	GUA
1321	G8V	Benign	0.04332525686245686	GGU	GUG
1322	G8V	Benign	0.04332525686245686	GGC	GUU
1323	G8V	Benign	0.04332525686245686	GGC	GUC
1324	G8V	Benign	0.04332525686245686	GGC	GUA
1325	G8V	Benign	0.04332525686245686	GGC	GUG
1326	G8V	Benign	0.04332525686245686	GGA	GUU
1327	G8V	Benign	0.04332525686245686	GGA	GUC
1328	G8V	Benign	0.04332525686245686	GGA	GUA
1329	G8V	Benign	0.04332525686245686	GGA	GUG
1330	G8V	Benign	0.04332525686245686	GGG	GUU
1331	G8V	Benign	0.04332525686245686	GGG	GUC
1332	G8V	Benign	0.04332525686245686	GGG	GUA
1333	G8V	Benign	0.04332525686245686	GGG	GUG
1334	G8C	Benign	0.01184469847921465	GGU	UGU
1335	G8C	Benign	0.01184469847921465	GGU	UGC
1336	G8C	Benign	0.01184469847921465	GGC	UGU
1337	G8C	Benign	0.01184469847921465	GGC	UGC
1338	G8C	Benign	0.01184469847921465	GGA	UGU
1339	G8C	Benign	0.01184469847921465	GGA	UGC
1340	G8C	Benign	0.01184469847921465	GGG	UGU
1341	G8C	Benign	0.01184469847921465	GGG	UGC
1342	G8P	Benign	0.137188218107244	GGU	CCU
1343	G8P	Benign	0.137188218107244	GGU	CCC
1344	G8P	Benign	0.137188218107244	GGU	CCA
1345	G8P	Benign	0.137188218107244	GGU	CCG
1346	G8P	Benign	0.137188218107244	GGC	CCU
1347	G8P	Benign	0.137188218107244	GGC	CCC
1348	G8P	Benign	0.137188218107244	GGC	CCA
1349	G8P	Benign	0.137188218107244	GGC	CCG
1350	G8P	Benign	0.137188218107244	GGA	CCU
1351	G8P	Benign	0.137188218107244	GGA	CCC
1352	G8P	Benign	0.137188218107244	GGA	CCA
1353	G8P	Benign	0.137188218107244	GGA	CCG
1354	G8P	Benign	0.137188218107244	GGG	CCU
1355	G8P	Benign	0.137188218107244	GGG	CCC
1356	G8P	Benign	0.137188218107244	GGG	CCA
1357	G8P	Benign	0.137188218107244	GGG	CCG
1358	G8L	Benign	0.042780833822205	GGU	UUA
1359	G8L	Benign	0.042780833822205	GGU	UUG
1360	G8L	Benign	0.042780833822205	GGU	CUU
1361	G8L	Benign	0.042780833822205	GGU	CUC
1362	G8L	Benign	0.042780833822205	GGU	CUA
1363	G8L	Benign	0.042780833822205	GGU	CUG
1364	G8L	Benign	0.042780833822205	GGC	UUA
1365	G8L	Benign	0.042780833822205	GGC	UUG
1366	G8L	Benign	0.042780833822205	GGC	CUU
1367	G8L	Benign	0.042780833822205	GGC	CUC
1368	G8L	Benign	0.042780833822205	GGC	CUA
1369	G8L	Benign	0.042780833822205	GGC	CUG
1370	G8L	Benign	0.042780833822205	GGA	UUA
1371	G8L	Benign	0.042780833822205	GGA	UUG
1372	G8L	Benign	0.042780833822205	GGA	CUU
1373	G8L	Benign	0.042780833822205	GGA	CUC
1374	G8L	Benign	0.042780833822205	GGA	CUA
1375	G8L	Benign	0.042780833822205	GGA	CUG
1376	G8L	Benign	0.042780833822205	GGG	UUA
1377	G8L	Benign	0.042780833822205	GGG	UUG
1378	G8L	Benign	0.042780833822205	GGG	CUU
1379	G8L	Benign	0.042780833822205	GGG	CUC
1380	G8L	Benign	0.042780833822205	GGG	CUA
1381	G8L	Benign	0.042780833822205	GGG	CUG
1382	G8I	Benign	0.04538495370561348	GGU	AUU
1383	G8I	Benign	0.04538495370561348	GGU	AUC
1384	G8I	Benign	0.04538495370561348	GGU	AUA
1385	G8I	Benign	0.04538495370561348	GGC	AUU
1386	G8I	Benign	0.04538495370561348	GGC	AUC
1387	G8I	Benign	0.04538495370561348	GGC	AUA
1388	G8I	Benign	0.04538495370561348	GGA	AUU
1389	G8I	Benign	0.04538495370561348	GGA	AUC
1390	G8I	Benign	0.04538495370561348	GGA	AUA
1391	G8I	Benign	0.04538495370561348	GGG	AUU
1392	G8I	Benign	0.04538495370561348	GGG	AUC
1393	G8I	Benign	0.04538495370561348	GGG	AUA
1394	G8M	Benign	0.0421506935040158	GGU	AUG
1395	G8M	Benign	0.0421506935040158	GGC	AUG
1396	G8M	Benign	0.0421506935040158	GGA	AUG
1397	G8M	Benign	0.0421506935040158	GGG	AUG
1398	G8W	Benign	0.06058035326819512	GGU	UGG
1399	G8W	Benign	0.06058035326819512	GGC	UGG
1400	G8W	Benign	0.06058035326819512	GGA	UGG
1401	G8W	Benign	0.06058035326819512	GGG	UGG
1402	G8F	Benign	0.05334045152420006	GGU	UUU
1403	G8F	Benign	0.05334045152420006	GGU	UUC
1404	G8F	Benign	0.05334045152420006	GGC	UUU
1405	G8F	Benign	0.05334045152420006	GGC	UUC
1406	G8F	Benign	0.05334045152420006	GGA	UUU
1407	G8F	Benign	0.05334045152420006	GGA	UUC
1408	G8F	Benign	0.05334045152420006	GGG	UUU
1409	G8F	Benign	0.05334045152420006	GGG	UUC
1410	G8K	Benign	0.0154115132722322	GGU	ACA
1411	G8K	Benign	0.0154115132722322	GGU	ACG
1412	G8K	Benign	0.0154115132722322	GGC	ACA
1413	G8K	Benign	0.0154115132722322	GGC	ACG
1414	G8K	Benign	0.0154115132722322	GGA	ACA
1415	G8K	Benign	0.0154115132722322	GGA	ACG
1416	G8K	Benign	0.0154115132722322	GGG	ACA
1417	G8K	Benign	0.0154115132722322	GGG	ACG
1418	G8R	Benign	0.01603328590253101	GGU	CGU
1419	G8R	Benign	0.01603328590253101	GGU	CGC
1420	G8R	Benign	0.01603328590253101	GGU	CGA
1421	G8R	Benign	0.01603328590253101	GGU	CGG
1422	G8R	Benign	0.01603328590253101	GGU	AGA
1423	G8R	Benign	0.01603328590253101	GGU	AGG
1424	G8R	Benign	0.01603328590253101	GGC	CGU
1425	G8R	Benign	0.01603328590253101	GGC	CGC
1426	G8R	Benign	0.01603328590253101	GGC	CGA
1427	G8R	Benign	0.01603328590253101	GGC	CGG
1428	G8R	Benign	0.01603328590253101	GGC	AGA
1429	G8R	Benign	0.01603328590253101	GGC	AGG
1430	G8R	Benign	0.01603328590253101	GGA	CGU
1431	G8R	Benign	0.01603328590253101	GGA	CGC
1432	G8R	Benign	0.01603328590253101	GGA	CGA
1433	G8R	Benign	0.01603328590253101	GGA	CGG
1434	G8R	Benign	0.01603328590253101	GGA	AGA
1435	G8R	Benign	0.01603328590253101	GGA	AGG
1436	G8R	Benign	0.01603328590253101	GGG	CGU
1437	G8R	Benign	0.01603328590253101	GGG	CGC
1438	G8R	Benign	0.01603328590253101	GGG	CGA
1439	G8R	Benign	0.01603328590253101	GGG	CGG
1440	G8R	Benign	0.01603328590253101	GGG	AGA
1441	G8R	Benign	0.01603328590253101	GGG	AGG
1442	G8H	Benign	0.01231856121212323	GGU	CAU
1443	G8H	Benign	0.01231856121212323	GGU	CAC
1444	G8H	Benign	0.01231856121212323	GGC	CAU
1445	G8H	Benign	0.01231856121212323	GGC	CAC
1446	G8H	Benign	0.01231856121212323	GGA	CAU
1447	G8H	Benign	0.01231856121212323	GGA	CAC
1448	G8H	Benign	0.01231856121212323	GGG	CAU
1449	G8H	Benign	0.01231856121212323	GGG	CAC
1450	G8S	Benign	0.01244814169225443	GGU	UCU
1451	G8S	Benign	0.01244814169225443	GGU	UCC
1452	G8S	Benign	0.01244814169225443	GGU	UCA
1453	G8S	Benign	0.01244814169225443	GGU	UCG
1454	G8S	Benign	0.01244814169225443	GGU	AGU
1455	G8S	Benign	0.01244814169225443	GGU	AGC
1456	G8S	Benign	0.01244814169225443	GGC	UCU
1457	G8S	Benign	0.01244814169225443	GGC	UCC
1458	G8S	Benign	0.01244814169225443	GGC	UCA
1459	G8S	Benign	0.01244814169225443	GGC	UCG
1460	G8S	Benign	0.01244814169225443	GGC	AGU
1461	G8S	Benign	0.01244814169225443	GGC	AGC
1462	G8S	Benign	0.01244814169225443	GGA	UCU
1463	G8S	Benign	0.01244814169225443	GGA	UCC
1464	G8S	Benign	0.01244814169225443	GGA	UCA
1465	G8S	Benign	0.01244814169225443	GGA	UCG
1466	G8S	Benign	0.01244814169225443	GGA	AGU
1467	G8S	Benign	0.01244814169225443	GGA	AGC
1468	G8S	Benign	0.01244814169225443	GGG	UCU
1469	G8S	Benign	0.01244814169225443	GGG	UCC
1470	G8S	Benign	0.01244814169225443	GGG	UCA
1471	G8S	Benign	0.01244814169225443	GGG	UCG
1472	G8S	Benign	0.01244814169225443	GGG	AGU
1473	G8S	Benign	0.01244814169225443	GGG	AGC
1474	G8T	Benign	0.01254718929188578	GGU	ACU
1475	G8T	Benign	0.01254718929188578	GGU	ACC
1476	G8T	Benign	0.01254718929188578	GGU	ACA
1477	G8T	Benign	0.01254718929188578	GGU	ACG
1478	G8T	Benign	0.01254718929188578	GGC	ACU
1479	G8T	Benign	0.01254718929188578	GGC	ACC
1480	G8T	Benign	0.01254718929188578	GGC	ACA
1481	G8T	Benign	0.01254718929188578	GGC	ACG
1482	G8T	Benign	0.01254718929188578	GGA	ACU
1483	G8T	Benign	0.01254718929188578	GGA	ACC
1484	G8T	Benign	0.01254718929188578	GGA	ACA
1485	G8T	Benign	0.01254718929188578	GGA	ACG
1486	G8T	Benign	0.01254718929188578	GGG	ACU
1487	G8T	Benign	0.01254718929188578	GGG	ACC
1488	G8T	Benign	0.01254718929188578	GGG	ACA
1489	G8T	Benign	0.01254718929188578	GGG	ACG
1490	G8Y	Benign	0.06265168343992412	GGU	UAU
1491	G8Y	Benign	0.06265168343992412	GGU	UAC
1492	G8Y	Benign	0.06265168343992412	GGC	UAU
1493	G8Y	Benign	0.06265168343992412	GGC	UAC
1494	G8Y	Benign	0.06265168343992412	GGA	UAU
1495	G8Y	Benign	0.06265168343992412	GGA	UAC
1496	G8Y	Benign	0.06265168343992412	GGG	UAU
1497	G8Y	Benign	0.06265168343992412	GGG	UAC
1498	G8N	Benign	0.01204295554809932	GGU	ACU
1499	G8N	Benign	0.01204295554809932	GGU	ACC
1500	G8N	Benign	0.01204295554809932	GGC	ACU
1501	G8N	Benign	0.01204295554809932	GGC	ACC
1502	G8N	Benign	0.01204295554809932	GGA	ACU
1503	G8N	Benign	0.01204295554809932	GGA	ACC
1504	G8N	Benign	0.01204295554809932	GGG	ACU
1505	G8N	Benign	0.01204295554809932	GGG	ACC
1506	G8Q	Benign	0.01256192305890815	GGU	CAA
1507	G8Q	Benign	0.01256192305890815	GGU	CAG
1508	G8Q	Benign	0.01256192305890815	GGC	CAA
1509	G8Q	Benign	0.01256192305890815	GGC	CAG
1510	G8Q	Benign	0.01256192305890815	GGA	CAA
1511	G8Q	Benign	0.01256192305890815	GGA	CAG
1512	G8Q	Benign	0.01256192305890815	GGG	CAA
1513	G8Q	Benign	0.01256192305890815	GGG	CAG
1514	G8D	Benign	0.01836526555009625	GGU	GAU
1515	G8D	Benign	0.01836526555009625	GGU	GAC
1516	G8D	Benign	0.01836526555009625	GGC	GAU
1517	G8D	Benign	0.01836526555009625	GGC	GAC
1518	G8D	Benign	0.01836526555009625	GGA	GAU
1519	G8D	Benign	0.01836526555009625	GGA	GAC
1520	G8D	Benign	0.01836526555009625	GGG	GAU
1521	G8D	Benign	0.01836526555009625	GGG	GAC
1522	G8E	Benign	0.01767825954396741	GGU	GAA
1523	G8E	Benign	0.01767825954396741	GGU	GCG
1524	G8E	Benign	0.01767825954396741	GGC	GAA
1525	G8E	Benign	0.01767825954396741	GGC	GCG
1526	G8E	Benign	0.01767825954396741	GGA	GAA
1527	G8E	Benign	0.01767825954396741	GGA	GCG
1528	G8E	Benign	0.01767825954396741	GGG	GAA
1529	G8E	Benign	0.01767825954396741	GGG	GCG
1530	G9A	Benign	0.03368193948196053	GGU	GCU
1531	G9A	Benign	0.03368193948196053	GGU	GCC
1532	G9A	Benign	0.03368193948196053	GGU	GCA
1533	G9A	Benign	0.03368193948196053	GGU	GAG
1534	G9A	Benign	0.03368193948196053	GGC	GCU
1535	G9A	Benign	0.03368193948196053	GGC	GCC
1536	G9A	Benign	0.03368193948196053	GGC	GCA
1537	G9A	Benign	0.03368193948196053	GGC	GAG
1538	G9A	Benign	0.03368193948196053	GGA	GCU
1539	G9A	Benign	0.03368193948196053	GGA	GCC
1540	G9A	Benign	0.03368193948196053	GGA	GCA
1541	G9A	Benign	0.03368193948196053	GGA	GAG
1542	G9A	Benign	0.03368193948196053	GGG	GCU
1543	G9A	Benign	0.03368193948196053	GGG	GCC
1544	G9A	Benign	0.03368193948196053	GGG	GCA
1545	G9A	Benign	0.03368193948196053	GGG	GAG
1546	G9V	Benign	0.03380939069334436	GGU	GUU
1547	G9V	Benign	0.03380939069334436	GGU	GUC
1548	G9V	Benign	0.03380939069334436	GGU	GUA
1549	G9V	Benign	0.03380939069334436	GGU	GUG
1550	G9V	Benign	0.03380939069334436	GGC	GUU
1551	G9V	Benign	0.03380939069334436	GGC	GUC
1552	G9V	Benign	0.03380939069334436	GGC	GUA
1553	G9V	Benign	0.03380939069334436	GGC	GUG
1554	G9V	Benign	0.03380939069334436	GGA	GUU
1555	G9V	Benign	0.03380939069334436	GGA	GUC
1556	G9V	Benign	0.03380939069334436	GGA	GUA
1557	G9V	Benign	0.03380939069334436	GGA	GUG
1558	G9V	Benign	0.03380939069334436	GGG	GUU
1559	G9V	Benign	0.03380939069334436	GGG	GUC
1560	G9V	Benign	0.03380939069334436	GGG	GUA
1561	G9V	Benign	0.03380939069334436	GGG	GUG
1562	G9C	Benign	0.00920140187987805	GGU	UGU
1563	G9C	Benign	0.00920140187987805	GGU	UGC
1564	G9C	Benign	0.00920140187987805	GGC	UGU
1565	G9C	Benign	0.00920140187987805	GGC	UGC
1566	G9C	Benign	0.00920140187987805	GGA	UGU
1567	G9C	Benign	0.00920140187987805	GGA	UGC
1568	G9C	Benign	0.00920140187987805	GGG	UGU
1569	G9C	Benign	0.00920140187987805	GGG	UGC
1570	G9P	Benign	0.118143927708904	GGU	CCU
1571	G9P	Benign	0.118143927708904	GGU	CCC
1572	G9P	Benign	0.118143927708904	GGU	CCA
1573	G9P	Benign	0.118143927708904	GGU	CCG
1574	G9P	Benign	0.118143927708904	GGC	CCU
1575	G9P	Benign	0.118143927708904	GGC	CCC
1576	G9P	Benign	0.118143927708904	GGC	CCA
1577	G9P	Benign	0.118143927708904	GGC	CCG
1578	G9P	Benign	0.118143927708904	GGA	CCU
1579	G9P	Benign	0.118143927708904	GGA	CCC
1580	G9P	Benign	0.118143927708904	GGA	CCA
1581	G9P	Benign	0.118143927708904	GGA	CCG
1582	G9P	Benign	0.118143927708904	GGG	CCU
1583	G9P	Benign	0.118143927708904	GGG	CCC
1584	G9P	Benign	0.118143927708904	GGG	CCA
1585	G9P	Benign	0.118143927708904	GGG	CCG
1586	G9L	Benign	0.03359903076474931	GGU	UUA
1587	G9L	Benign	0.03359903076474931	GGU	UUG
1588	G9L	Benign	0.03359903076474931	GGU	CUU
1589	G9L	Benign	0.03359903076474931	GGU	CUC
1590	G9L	Benign	0.03359903076474931	GGU	CUA
1591	G9L	Benign	0.03359903076474931	GGU	CUG
1592	G9L	Benign	0.03359903076474931	GGC	UUA
1593	G9L	Benign	0.03359903076474931	GGC	UUG
1594	G9L	Benign	0.03359903076474931	GGC	CUU
1595	G9L	Benign	0.03359903076474931	GGC	CUC
1596	G9L	Benign	0.03359903076474931	GGC	CUA
1597	G9L	Benign	0.03359903076474931	GGC	CUG
1598	G9L	Benign	0.03359903076474931	GGA	UUA
1599	G9L	Benign	0.03359903076474931	GGA	UUG
1600	G9L	Benign	0.03359903076474931	GGA	CUU
1601	G9L	Benign	0.03359903076474931	GGA	CUC
1602	G9L	Benign	0.03359903076474931	GGA	CUA
1603	G9L	Benign	0.03359903076474931	GGA	CUG
1604	G9L	Benign	0.03359903076474931	GGG	UUA
1605	G9L	Benign	0.03359903076474931	GGG	UUG
1606	G9L	Benign	0.03359903076474931	GGG	CUU
1607	G9L	Benign	0.03359903076474931	GGG	CUC
1608	G9L	Benign	0.03359903076474931	GGG	CUA
1609	G9L	Benign	0.03359903076474931	GGG	CUG
1610	G9I	Benign	0.03383965389160647	GGU	AUU
1611	G9I	Benign	0.03383965389160647	GGU	AUC
1612	G9I	Benign	0.03383965389160647	GGU	AUA
1613	G9I	Benign	0.03383965389160647	GGC	AUU
1614	G9I	Benign	0.03383965389160647	GGC	AUC
1615	G9I	Benign	0.03383965389160647	GGC	AUA
1616	G9I	Benign	0.03383965389160647	GGA	AUU
1617	G9I	Benign	0.03383965389160647	GGA	AUC
1618	G9I	Benign	0.03383965389160647	GGA	AUA
1619	G9I	Benign	0.03383965389160647	GGG	AUU
1620	G9I	Benign	0.03383965389160647	GGG	AUC
1621	G9I	Benign	0.03383965389160647	GGG	AUA
1622	G9M	Benign	0.03332381130867915	GGU	AUG
1623	G9M	Benign	0.03332381130867915	GGC	AUG
1624	G9M	Benign	0.03332381130867915	GGA	AUG
1625	G9M	Benign	0.03332381130867915	GGG	AUG
1626	G9W	Benign	0.04371955207055001	GGU	UGG
1627	G9W	Benign	0.04371955207055001	GGC	UGG
1628	G9W	Benign	0.04371955207055001	GGA	UGG
1629	G9W	Benign	0.04371955207055001	GGG	UGG
1630	G9F	Benign	0.03951997197092783	GGU	UUU
1631	G9F	Benign	0.03951997197092783	GGU	UUC
1632	G9F	Benign	0.03951997197092783	GGC	UUU
1633	G9F	Benign	0.03951997197092783	GGC	UUC
1634	G9F	Benign	0.03951997197092783	GGA	UUU
1635	G9F	Benign	0.03951997197092783	GGA	UUC
1636	G9F	Benign	0.03951997197092783	GGG	UUU
1637	G9F	Benign	0.03951997197092783	GGG	UUC
1638	G9K	Benign	0.01556119878072385	GGU	ACA
1639	G9K	Benign	0.01556119878072385	GGU	ACG
1640	G9K	Benign	0.01556119878072385	GGC	ACA
1641	G9K	Benign	0.01556119878072385	GGC	ACG
1642	G9K	Benign	0.01556119878072385	GGA	ACA
1643	G9K	Benign	0.01556119878072385	GGA	ACG
1644	G9K	Benign	0.01556119878072385	GGG	ACA
1645	G9K	Benign	0.01556119878072385	GGG	ACG
1646	G9R	Benign	0.01389351249586183	GGU	CGU
1647	G9R	Benign	0.01389351249586183	GGU	CGC
1648	G9R	Benign	0.01389351249586183	GGU	CGA
1649	G9R	Benign	0.01389351249586183	GGU	CGG
1650	G9R	Benign	0.01389351249586183	GGU	AGA
1651	G9R	Benign	0.01389351249586183	GGU	AGG
1652	G9R	Benign	0.01389351249586183	GGC	CGU
1653	G9R	Benign	0.01389351249586183	GGC	CGC
1654	G9R	Benign	0.01389351249586183	GGC	CGA
1655	G9R	Benign	0.01389351249586183	GGC	CGG
1656	G9R	Benign	0.01389351249586183	GGC	AGA
1657	G9R	Benign	0.01389351249586183	GGC	AGG
1658	G9R	Benign	0.01389351249586183	GGA	CGU
1659	G9R	Benign	0.01389351249586183	GGA	CGC
1660	G9R	Benign	0.01389351249586183	GGA	CGA
1661	G9R	Benign	0.01389351249586183	GGA	CGG
1662	G9R	Benign	0.01389351249586183	GGA	AGA
1663	G9R	Benign	0.01389351249586183	GGA	AGG
1664	G9R	Benign	0.01389351249586183	GGG	CGU
1665	G9R	Benign	0.01389351249586183	GGG	CGC
1666	G9R	Benign	0.01389351249586183	GGG	CGA
1667	G9R	Benign	0.01389351249586183	GGG	CGG
1668	G9R	Benign	0.01389351249586183	GGG	AGA
1669	G9R	Benign	0.01389351249586183	GGG	AGG
1670	G9H	Benign	0.01155852941701825	GGU	CAU
1671	G9H	Benign	0.01155852941701825	GGU	CAC
1672	G9H	Benign	0.01155852941701825	GGC	CAU
1673	G9H	Benign	0.01155852941701825	GGC	CAC
1674	G9H	Benign	0.01155852941701825	GGA	CAU
1675	G9H	Benign	0.01155852941701825	GGA	CAC
1676	G9H	Benign	0.01155852941701825	GGG	CAU
1677	G9H	Benign	0.01155852941701825	GGG	CAC
1678	G9S	Benign	0.009435346581544744	GGU	UCU
1679	G9S	Benign	0.009435346581544744	GGU	UCC
1680	G9S	Benign	0.009435346581544744	GGU	UCA
1681	G9S	Benign	0.009435346581544744	GGU	UCG
1682	G9S	Benign	0.009435346581544744	GGU	AGU
1683	G9S	Benign	0.009435346581544744	GGU	AGC
1684	G9S	Benign	0.009435346581544744	GGC	UCU
1685	G9S	Benign	0.009435346581544744	GGC	UCC
1686	G9S	Benign	0.009435346581544744	GGC	UCA
1687	G9S	Benign	0.009435346581544744	GGC	UCG
1688	G9S	Benign	0.009435346581544744	GGC	AGU
1689	G9S	Benign	0.009435346581544744	GGC	AGC
1690	G9S	Benign	0.009435346581544744	GGA	UCU
1691	G9S	Benign	0.009435346581544744	GGA	UCC
1692	G9S	Benign	0.009435346581544744	GGA	UCA
1693	G9S	Benign	0.009435346581544744	GGA	UCG
1694	G9S	Benign	0.009435346581544744	GGA	AGU
1695	G9S	Benign	0.009435346581544744	GGA	AGC
1696	G9S	Benign	0.009435346581544744	GGG	UCU
1697	G9S	Benign	0.009435346581544744	GGG	UCC
1698	G9S	Benign	0.009435346581544744	GGG	UCA
1699	G9S	Benign	0.009435346581544744	GGG	UCG
1700	G9S	Benign	0.009435346581544744	GGG	AGU
1701	G9S	Benign	0.009435346581544744	GGG	AGC
1702	G9T	Benign	0.009482467307581826	GGU	ACU
1703	G9T	Benign	0.009482467307581826	GGU	ACC
1704	G9T	Benign	0.009482467307581826	GGU	ACA
1705	G9T	Benign	0.009482467307581826	GGU	ACG
1706	G9T	Benign	0.009482467307581826	GGC	ACU
1707	G9T	Benign	0.009482467307581826	GGC	ACC
1708	G9T	Benign	0.009482467307581826	GGC	ACA
1709	G9T	Benign	0.009482467307581826	GGC	ACG
1710	G9T	Benign	0.009482467307581826	GGA	ACU
1711	G9T	Benign	0.009482467307581826	GGA	ACC
1712	G9T	Benign	0.009482467307581826	GGA	ACA
1713	G9T	Benign	0.009482467307581826	GGA	ACG
1714	G9T	Benign	0.009482467307581826	GGG	ACU
1715	G9T	Benign	0.009482467307581826	GGG	ACC
1716	G9T	Benign	0.009482467307581826	GGG	ACA
1717	G9T	Benign	0.009482467307581826	GGG	ACG
1718	G9Y	Benign	0.04485191385111703	GGU	UAU
1719	G9Y	Benign	0.04485191385111703	GGU	UAC
1720	G9Y	Benign	0.04485191385111703	GGC	UAU
1721	G9Y	Benign	0.04485191385111703	GGC	UAC
1722	G9Y	Benign	0.04485191385111703	GGA	UAU
1723	G9Y	Benign	0.04485191385111703	GGA	UAC
1724	G9Y	Benign	0.04485191385111703	GGG	UAU
1725	G9Y	Benign	0.04485191385111703	GGG	UAC
1726	G9N	Benign	0.0113685007659709	GGU	ACU
1727	G9N	Benign	0.0113685007659709	GGU	ACC
1728	G9N	Benign	0.0113685007659709	GGC	ACU
1729	G9N	Benign	0.0113685007659709	GGC	ACC
1730	G9N	Benign	0.0113685007659709	GGA	ACU
1731	G9N	Benign	0.0113685007659709	GGA	ACC
1732	G9N	Benign	0.0113685007659709	GGG	ACU
1733	G9N	Benign	0.0113685007659709	GGG	ACC
1734	G9Q	Benign	0.009471533975856886	GGU	CAA
1735	G9Q	Benign	0.009471533975856886	GGU	CAG
1736	G9Q	Benign	0.009471533975856886	GGC	CAA
1737	G9Q	Benign	0.009471533975856886	GGC	CAG
1738	G9Q	Benign	0.009471533975856886	GGA	CAA
1739	G9Q	Benign	0.009471533975856886	GGA	CAG
1740	G9Q	Benign	0.009471533975856886	GGG	CAA
1741	G9Q	Benign	0.009471533975856886	GGG	CAG
1742	G9D	Benign	0.01764085558480765	GGU	GAU
1743	G9D	Benign	0.01764085558480765	GGU	GAC
1744	G9D	Benign	0.01764085558480765	GGC	GAU
1745	G9D	Benign	0.01764085558480765	GGC	GAC
1746	G9D	Benign	0.01764085558480765	GGA	GAU
1747	G9D	Benign	0.01764085558480765	GGA	GAC
1748	G9D	Benign	0.01764085558480765	GGG	GAU
1749	G9D	Benign	0.01764085558480765	GGG	GAC
1750	G9E	Benign	0.01669428758303016	GGU	GAA
1751	G9E	Benign	0.01669428758303016	GGU	GCG
1752	G9E	Benign	0.01669428758303016	GGC	GAA
1753	G9E	Benign	0.01669428758303016	GGC	GCG
1754	G9E	Benign	0.01669428758303016	GGA	GAA
1755	G9E	Benign	0.01669428758303016	GGA	GCG
1756	G9E	Benign	0.01669428758303016	GGG	GAA
1757	G9E	Benign	0.01669428758303016	GGG	GCG
1758	V10A	Benign	0.01224218667573911	GUU	GCU
1759	V10A	Benign	0.01224218667573911	GUU	GCC
1760	V10A	Benign	0.01224218667573911	GUU	GCA
1761	V10A	Benign	0.01224218667573911	GUU	GAG
1762	V10A	Benign	0.01224218667573911	GUC	GCU
1763	V10A	Benign	0.01224218667573911	GUC	GCC
1764	V10A	Benign	0.01224218667573911	GUC	GCA
1765	V10A	Benign	0.01224218667573911	GUC	GAG
1766	V10A	Benign	0.01224218667573911	GUA	GCU
1767	V10A	Benign	0.01224218667573911	GUA	GCC
1768	V10A	Benign	0.01224218667573911	GUA	GCA
1769	V10A	Benign	0.01224218667573911	GUA	GAG
1770	V10A	Benign	0.01224218667573911	GUG	GCU
1771	V10A	Benign	0.01224218667573911	GUG	GCC
1772	V10A	Benign	0.01224218667573911	GUG	GCA
1773	V10A	Benign	0.01224218667573911	GUG	GAG
1774	V10G	Benign	0.01338014567192463	GUU	GGU
1775	V10G	Benign	0.01338014567192463	GUU	GGC
1776	V10G	Benign	0.01338014567192463	GUU	GGA
1777	V10G	Benign	0.01338014567192463	GUU	GGG
1778	V10G	Benign	0.01338014567192463	GUC	GGU
1779	V10G	Benign	0.01338014567192463	GUC	GGC
1780	V10G	Benign	0.01338014567192463	GUC	GGA
1781	V10G	Benign	0.01338014567192463	GUC	GGG
1782	V10G	Benign	0.01338014567192463	GUA	GGU
1783	V10G	Benign	0.01338014567192463	GUA	GGC
1784	V10G	Benign	0.01338014567192463	GUA	GGA
1785	V10G	Benign	0.01338014567192463	GUA	GGG
1786	V10G	Benign	0.01338014567192463	GUG	GGU
1787	V10G	Benign	0.01338014567192463	GUG	GGC
1788	V10G	Benign	0.01338014567192463	GUG	GGA
1789	V10G	Benign	0.01338014567192463	GUG	GGG
1790	V10C	Benign	0.01016283659536639	GUU	UGU
1791	V10C	Benign	0.01016283659536639	GUU	UGC
1792	V10C	Benign	0.01016283659536639	GUC	UGU
1793	V10C	Benign	0.01016283659536639	GUC	UGC
1794	V10C	Benign	0.01016283659536639	GUA	UGU
1795	V10C	Benign	0.01016283659536639	GUA	UGC
1796	V10C	Benign	0.01016283659536639	GUG	UGU
1797	V10C	Benign	0.01016283659536639	GUG	UGC
1798	V10P	Benign	0.09542643661555128	GUU	CCU
1799	V10P	Benign	0.09542643661555128	GUU	CCC
1800	V10P	Benign	0.09542643661555128	GUU	CCA
1801	V10P	Benign	0.09542643661555128	GUU	CCG
1802	V10P	Benign	0.09542643661555128	GUC	CCU
1803	V10P	Benign	0.09542643661555128	GUC	CCC
1804	V10P	Benign	0.09542643661555128	GUC	CCA
1805	V10P	Benign	0.09542643661555128	GUC	CCG
1806	V10P	Benign	0.09542643661555128	GUA	CCU
1807	V10P	Benign	0.09542643661555128	GUA	CCC
1808	V10P	Benign	0.09542643661555128	GUA	CCA
1809	V10P	Benign	0.09542643661555128	GUA	CCG
1810	V10P	Benign	0.09542643661555128	GUG	CCU
1811	V10P	Benign	0.09542643661555128	GUG	CCC
1812	V10P	Benign	0.09542643661555128	GUG	CCA
1813	V10P	Benign	0.09542643661555128	GUG	CCG
1814	V10L	Benign	0.01026579795994531	GUU	UUA
1815	V10L	Benign	0.01026579795994531	GUU	UUG
1816	V10L	Benign	0.01026579795994531	GUU	CUU
1817	V10L	Benign	0.01026579795994531	GUU	CUC
1818	V10L	Benign	0.01026579795994531	GUU	CUA
1819	V10L	Benign	0.01026579795994531	GUU	CUG
1820	V10L	Benign	0.01026579795994531	GUC	UUA
1821	V10L	Benign	0.01026579795994531	GUC	UUG
1822	V10L	Benign	0.01026579795994531	GUC	CUU
1823	V10L	Benign	0.01026579795994531	GUC	CUC
1824	V10L	Benign	0.01026579795994531	GUC	CUA
1825	V10L	Benign	0.01026579795994531	GUC	CUG
1826	V10L	Benign	0.01026579795994531	GUA	UUA
1827	V10L	Benign	0.01026579795994531	GUA	UUG
1828	V10L	Benign	0.01026579795994531	GUA	CUU
1829	V10L	Benign	0.01026579795994531	GUA	CUC
1830	V10L	Benign	0.01026579795994531	GUA	CUA
1831	V10L	Benign	0.01026579795994531	GUA	CUG
1832	V10L	Benign	0.01026579795994531	GUG	UUA
1833	V10L	Benign	0.01026579795994531	GUG	UUG
1834	V10L	Benign	0.01026579795994531	GUG	CUU
1835	V10L	Benign	0.01026579795994531	GUG	CUC
1836	V10L	Benign	0.01026579795994531	GUG	CUA
1837	V10L	Benign	0.01026579795994531	GUG	CUG
1838	V10I	Benign	0.01018831249099534	GUU	AUU
1839	V10I	Benign	0.01018831249099534	GUU	AUC
1840	V10I	Benign	0.01018831249099534	GUU	AUA
1841	V10I	Benign	0.01018831249099534	GUC	AUU
1842	V10I	Benign	0.01018831249099534	GUC	AUC
1843	V10I	Benign	0.01018831249099534	GUC	AUA
1844	V10I	Benign	0.01018831249099534	GUA	AUU
1845	V10I	Benign	0.01018831249099534	GUA	AUC
1846	V10I	Benign	0.01018831249099534	GUA	AUA
1847	V10I	Benign	0.01018831249099534	GUG	AUU
1848	V10I	Benign	0.01018831249099534	GUG	AUC
1849	V10I	Benign	0.01018831249099534	GUG	AUA
1850	V10M	Benign	0.01017957468640103	GUU	AUG
1851	V10M	Benign	0.01017957468640103	GUC	AUG
1852	V10M	Benign	0.01017957468640103	GUA	AUG
1853	V10M	Benign	0.01017957468640103	GUG	AUG
1854	V10W	Benign	0.03570263203174065	GUU	UGG
1855	V10W	Benign	0.03570263203174065	GUC	UGG
1856	V10W	Benign	0.03570263203174065	GUA	UGG
1857	V10W	Benign	0.03570263203174065	GUG	UGG
1858	V10F	Benign	0.01937886480850982	GUU	UUU
1859	V10F	Benign	0.01937886480850982	GUU	UUC
1860	V10F	Benign	0.01937886480850982	GUC	UUU
1861	V10F	Benign	0.01937886480850982	GUC	UUC
1862	V10F	Benign	0.01937886480850982	GUA	UUU
1863	V10F	Benign	0.01937886480850982	GUA	UUC
1864	V10F	Benign	0.01937886480850982	GUG	UUU
1865	V10F	Benign	0.01937886480850982	GUG	UUC
1866	V10K	Benign	0.02220053824193766	GUU	ACA
1867	V10K	Benign	0.02220053824193766	GUU	ACG
1868	V10K	Benign	0.02220053824193766	GUC	ACA
1869	V10K	Benign	0.02220053824193766	GUC	ACG
1870	V10K	Benign	0.02220053824193766	GUA	ACA
1871	V10K	Benign	0.02220053824193766	GUA	ACG
1872	V10K	Benign	0.02220053824193766	GUG	ACA
1873	V10K	Benign	0.02220053824193766	GUG	ACG
1874	V10R	Benign	0.02281787393178577	GUU	CGU
1875	V10R	Benign	0.02281787393178577	GUU	CGC
1876	V10R	Benign	0.02281787393178577	GUU	CGA
1877	V10R	Benign	0.02281787393178577	GUU	CGG
1878	V10R	Benign	0.02281787393178577	GUU	AGA
1879	V10R	Benign	0.02281787393178577	GUU	AGG
1880	V10R	Benign	0.02281787393178577	GUC	CGU
1881	V10R	Benign	0.02281787393178577	GUC	CGC
1882	V10R	Benign	0.02281787393178577	GUC	CGA
1883	V10R	Benign	0.02281787393178577	GUC	CGG
1884	V10R	Benign	0.02281787393178577	GUC	AGA
1885	V10R	Benign	0.02281787393178577	GUC	AGG
1886	V10R	Benign	0.02281787393178577	GUA	CGU
1887	V10R	Benign	0.02281787393178577	GUA	CGC
1888	V10R	Benign	0.02281787393178577	GUA	CGA
1889	V10R	Benign	0.02281787393178577	GUA	CGG
1890	V10R	Benign	0.02281787393178577	GUA	AGA
1891	V10R	Benign	0.02281787393178577	GUA	AGG
1892	V10R	Benign	0.02281787393178577	GUG	CGU
1893	V10R	Benign	0.02281787393178577	GUG	CGC
1894	V10R	Benign	0.02281787393178577	GUG	CGA
1895	V10R	Benign	0.02281787393178577	GUG	CGG
1896	V10R	Benign	0.02281787393178577	GUG	AGA
1897	V10R	Benign	0.02281787393178577	GUG	AGG
1898	V10H	Benign	0.01585851824347049	GUU	CAU
1899	V10H	Benign	0.01585851824347049	GUU	CAC
1900	V10H	Benign	0.01585851824347049	GUC	CAU
1901	V10H	Benign	0.01585851824347049	GUC	CAC
1902	V10H	Benign	0.01585851824347049	GUA	CAU
1903	V10H	Benign	0.01585851824347049	GUA	CAC
1904	V10H	Benign	0.01585851824347049	GUG	CAU
1905	V10H	Benign	0.01585851824347049	GUG	CAC
1906	V10S	Benign	0.01349665737303941	GUU	UCU
1907	V10S	Benign	0.01349665737303941	GUU	UCC
1908	V10S	Benign	0.01349665737303941	GUU	UCA
1909	V10S	Benign	0.01349665737303941	GUU	UCG
1910	V10S	Benign	0.01349665737303941	GUU	AGU
1911	V10S	Benign	0.01349665737303941	GUU	AGC
1912	V10S	Benign	0.01349665737303941	GUC	UCU
1913	V10S	Benign	0.01349665737303941	GUC	UCC
1914	V10S	Benign	0.01349665737303941	GUC	UCA
1915	V10S	Benign	0.01349665737303941	GUC	UCG
1916	V10S	Benign	0.01349665737303941	GUC	AGU
1917	V10S	Benign	0.01349665737303941	GUC	AGC
1918	V10S	Benign	0.01349665737303941	GUA	UCU
1919	V10S	Benign	0.01349665737303941	GUA	UCC
1920	V10S	Benign	0.01349665737303941	GUA	UCA
1921	V10S	Benign	0.01349665737303941	GUA	UCG
1922	V10S	Benign	0.01349665737303941	GUA	AGU
1923	V10S	Benign	0.01349665737303941	GUA	AGC
1924	V10S	Benign	0.01349665737303941	GUG	UCU
1925	V10S	Benign	0.01349665737303941	GUG	UCC
1926	V10S	Benign	0.01349665737303941	GUG	UCA
1927	V10S	Benign	0.01349665737303941	GUG	UCG
1928	V10S	Benign	0.01349665737303941	GUG	AGU
1929	V10S	Benign	0.01349665737303941	GUG	AGC
1930	V10T	Benign	0.01138191131719556	GUU	ACU
1931	V10T	Benign	0.01138191131719556	GUU	ACC
1932	V10T	Benign	0.01138191131719556	GUU	ACA
1933	V10T	Benign	0.01138191131719556	GUU	ACG
1934	V10T	Benign	0.01138191131719556	GUC	ACU
1935	V10T	Benign	0.01138191131719556	GUC	ACC
1936	V10T	Benign	0.01138191131719556	GUC	ACA
1937	V10T	Benign	0.01138191131719556	GUC	ACG
1938	V10T	Benign	0.01138191131719556	GUA	ACU
1939	V10T	Benign	0.01138191131719556	GUA	ACC
1940	V10T	Benign	0.01138191131719556	GUA	ACA
1941	V10T	Benign	0.01138191131719556	GUA	ACG
1942	V10T	Benign	0.01138191131719556	GUG	ACU
1943	V10T	Benign	0.01138191131719556	GUG	ACC
1944	V10T	Benign	0.01138191131719556	GUG	ACA
1945	V10T	Benign	0.01138191131719556	GUG	ACG
1946	V10Y	Benign	0.03870372653785405	GUU	UAU
1947	V10Y	Benign	0.03870372653785405	GUU	UAC
1948	V10Y	Benign	0.03870372653785405	GUC	UAU
1949	V10Y	Benign	0.03870372653785405	GUC	UAC
1950	V10Y	Benign	0.03870372653785405	GUA	UAU
1951	V10Y	Benign	0.03870372653785405	GUA	UAC
1952	V10Y	Benign	0.03870372653785405	GUG	UAU
1953	V10Y	Benign	0.03870372653785405	GUG	UAC
1954	V10N	Benign	0.02079438076037602	GUU	ACU
1955	V10N	Benign	0.02079438076037602	GUU	ACC
1956	V10N	Benign	0.02079438076037602	GUC	ACU
1957	V10N	Benign	0.02079438076037602	GUC	ACC
1958	V10N	Benign	0.02079438076037602	GUA	ACU
1959	V10N	Benign	0.02079438076037602	GUA	ACC
1960	V10N	Benign	0.02079438076037602	GUG	ACU
1961	V10N	Benign	0.02079438076037602	GUG	ACC
1962	V10Q	Benign	0.01664615554790525	GUU	CAA
1963	V10Q	Benign	0.01664615554790525	GUU	CAG
1964	V10Q	Benign	0.01664615554790525	GUC	CAA
1965	V10Q	Benign	0.01664615554790525	GUC	CAG
1966	V10Q	Benign	0.01664615554790525	GUA	CAA
1967	V10Q	Benign	0.01664615554790525	GUA	CAG
1968	V10Q	Benign	0.01664615554790525	GUG	CAA
1969	V10Q	Benign	0.01664615554790525	GUG	CAG
1970	V10D	Benign	0.02079882986721172	GUU	GAU
1971	V10D	Benign	0.02079882986721172	GUU	GAC
1972	V10D	Benign	0.02079882986721172	GUC	GAU
1973	V10D	Benign	0.02079882986721172	GUC	GAC
1974	V10D	Benign	0.02079882986721172	GUA	GAU
1975	V10D	Benign	0.02079882986721172	GUA	GAC
1976	V10D	Benign	0.02079882986721172	GUG	GAU
1977	V10D	Benign	0.02079882986721172	GUG	GAC
1978	V10E	Benign	0.01804062294261224	GUU	GAA
1979	V10E	Benign	0.01804062294261224	GUU	GCG
1980	V10E	Benign	0.01804062294261224	GUC	GAA
1981	V10E	Benign	0.01804062294261224	GUC	GCG
1982	V10E	Benign	0.01804062294261224	GUA	GAA
1983	V10E	Benign	0.01804062294261224	GUA	GCG
1984	V10E	Benign	0.01804062294261224	GUG	GAA
1985	V10E	Benign	0.01804062294261224	GUG	GCG
1986	Y11A	Benign	0.01794330263855832	UAU	GCU
1987	Y11A	Benign	0.01794330263855832	UAU	GCC
1988	Y11A	Benign	0.01794330263855832	UAU	GCA
1989	Y11A	Benign	0.01794330263855832	UAU	GAG
1990	Y11A	Benign	0.01794330263855832	UAC	GCU
1991	Y11A	Benign	0.01794330263855832	UAC	GCC
1992	Y11A	Benign	0.01794330263855832	UAC	GCA
1993	Y11A	Benign	0.01794330263855832	UAC	GAG
1994	Y11G	Benign	0.01759169018375291	UAU	GGU
1995	Y11G	Benign	0.01759169018375291	UAU	GGC
1996	Y11G	Benign	0.01759169018375291	UAU	GGA
1997	Y11G	Benign	0.01759169018375291	UAU	GGG
1998	Y11G	Benign	0.01759169018375291	UAC	GGU
[truncated: 181,955 more rows]
