# Supplementary material for: MLe-KCNQ2: An Artificial Intelligence Model for the Prognosis of Missense KCNQ2 Gene Variants
Source: Int J Mol Sci. 2024 Mar 2;25(5):2910. doi: 10.3390/ijms25052910 (PMC10932340; doi:10.3390/ijms25052910)
Supplement: Supplementary file 1 [file ijms-25-02910-s001.zip › Supp_Species_UniProt_Codes.xlsx]

## Sheet: TableS1
Amino acid	Charge	Polarity	Aromaticity	Size (Da)	Standardized volume (%)	Medium solvent accessibility (%)	Hydrophobicity
(Ser) S	neutral	polar	non aromatic	105.09	18.1	40.5	-0.8
(Thr) T	neutral	polar	non aromatic	119.12	34	35.3	-0.7
(Gln) Q	neutral	polar	non aromatic	146.15	51.3	43.6	-3.5
(Asn) N	neutral	polar	non aromatic	132.12	35.4	46.1	-3.5
(Tyr) Y	neutral	non polar	aromatic	181.19	78.5	30.1	-1.3
(Cys) C	neutral	polar	non aromatic	121.16	28	7.4	2.5
(Gly) G	neutral	polar	non aromatic	75.07	0	54	-0.4
(Ala) A	neutral	non polar	non aromatic	89.09	15.9	37.4	1.8
(Val) V	neutral	non polar	non aromatic	117.15	47.7	19.6	4.2
(Leu) L	neutral	non polar	non aromatic	131.17	63.6	10.1	3.8
(Ile) I	neutral	non polar	non aromatic	131.17	63.6	7.5	4.5
(Met) M	neutral	non polar	non aromatic	149.21	62.8	3.9	1.9
(Pro) P	neutral	non polar	non aromatic	115.13	41	66.2	-1.6
(Phe) F	neutral	non polar	aromatic	165.19	77.2	5.5	2.8
(Trp) W	neutral	non polar	aromatic	204.23	100	13.8	-0.9
(Asp) D	negative	polar	non aromatic	133.1	31.3	45	-3.5
(Glu) E	negative	polar	non aromatic	147.13	47.2	48.6	-3.5
(Lys) K	positive	polar	non aromatic	146.19	68	54.3	-3.9
(Arg) R	positive	polar	non aromatic	174.2	70.8	50.1	-4.5
(His) H	positive	polar	non aromatic	155.16	49.2	28.1	-3.2

## Sheet: TableS2
Topological domain	Initial residue	Final residue	Reference
S1	A92	F112	UniProt (O43526)
S2	E123	V143	UniProt (O43526)
S3	P167	S187	UniProt (O43526)
S4	A196	W218	UniProt (O43526)
S5	L232	L252	UniProt (O43526)
Pore	A265	P285	UniProt (O43526)
S6	L292	L312	UniProt (O43526)
hA	R332	N350	RSCB PDB (7CR3)
hTW	H357	T366	RSCB PDB (7CR3)
hB	G535	L559	RSCB PDB (7CR3)
hC	D563	G594	RSCB PDB (7CR3)
hD	R622	R647	Bernardo-Seisdedos (2015)

## Sheet: TableS3
Functional domain	Initial residue	Final residue	Reference
Voltage sensor domain (S1-S4)	A92	W218	Ambrosino et al. (2015)
Selectivity filter	T277	D282	UniProt (O43526)
Pore domain (S5-S6)	L232	L312	Bañales-Belaunde (2019); Yus-Nájera et al. (2002)
CaM interaction (hA-hTW-hB)	R332	L559	Ambrosino et al. (2015)
SID domain (hC-hD)	D563	R647	Bernardo-Seisdedos (2015)
Unknown function	Residues not included in any of the above ranges

## Sheet: TableS4
UniProt Code	Specie	UniProt Code	Specie
A0A6J1YBD7	Acinonyx jubatus	A0A6J1VM80	Notechis scutatus
A0A7N5JUP3	Ailuropoda melanoleuca	A0A7L4BX40	Nyctiprogne leucopyga
A0A2K5EWT1	Aotus nancymaae	A0A6P3FS62	Octodon degus
A0A6P3GU07	Bison bison bison	A0A2U3WMF7	Odobenus rosmarus divergens
G3N2R2	Bos taurus	A0A6J0W124	Odocoileus virginianus texanus
F7CY15	Callithrix jacchus	A0A7L1ERT0	Oenanthe oenanthe
A0A452E7F3	Capra hircus	H0X1I7	Otolemur garnettii
A0A286XK97	Cavia porcellus	A0A6P3YM10	Ovis aries
A0A2K5QX14	Cebus imitator	A0A2R9AU86	Pan paniscus
A0A2K5L1K5	Cercocebus atys	H2QKS4	Pan troglodytes
A0A7L3EB03	Chaetops frenatus	A0A6P9E1I7	Pantherophis guttatus
A0A6J2VKS8	Chanos chanos	A0A2I3NHI2	Papio anubis
A0A6I9KEP6	Chrysochloris asiatica	A0A6J0CPL8	Peromyscus maniculatus bairdii
A0A6J2PDX4	Cottoperca gobio	A0A6P5JXG8	Phascolarctos cinereus
A0A2Y9Q6H4	Delphinapterus leucas	A0A6J2MPK5	Phyllostomus discolor
A0A4W4F1P1	Electrophorus electricus	A0A2Y9T7Y1	Physeter macrocephalus
F6VHK7	Equus caballus	A0A2K6ET95	Propithecus coquereli
A0A1S3WCY9	Erinaceus europaeus	O88943	Rattus norvegicus
M3WAG9	Felis catus	A0A671F4Z0	Rhinolophus ferrumequinum
G3QZ98	Gorilla gorilla gorilla	A0A2K6P629	Rhinopithecus roxellana
A0A7K9DPE3	Hemiprocne comata	A0A7N4NU17	Sarcophilus harrisii
O43526	Homo sapiens	A0A672MMS1	Sinocyclocheilus grahami
A0A2D0RWX1	Ictalurus punctatus	A0A286ZS06	Sus scrofa
A0A287DBX6	Ictidomys tridecemlineatus	A0A6J3Q231	Tursiops truncatus
A0A6J0IPQ1	Lepidothrix coronata	A0A452SKB9	Ursus americanus
A0A340XT99	Lipotes vexillifer	A0A3Q7W3Y1	Ursus arctos horribilis
A0A2K6C5Y1	Macaca nemestrina	A0A6J3BGW9	Vicugna pacos
A0A1U8BXY3	Mesocricetus auratus	A0A4X2LHR0	Vombatus ursinus
F6WQP9	Monodelphis domestica	A0A3Q7U035	Vulpes vulpes
B7ZBV9	Mus musculus	A0A6I8QM30	Xenopus tropicalis
A0A341BVZ4	Neophocaena asiaeorientalis	A0A6J2FFJ4	Zalophus californianus
